# Supplementary material for: An ancestral Wnt-Brachyury feedback loop and recruitment of mesoderm-determining target genes revealed by comparative Brachyury target screens
Source: Research Square preprint supplement (doi:10.21203/rs.3.rs-753399/v1), 2021-08-10
Supplement: Supplementary file 1 [file 6a6d2fe6f90754f9eab420f5.xlsx]

## Sheet: MMU
GENE	OMA	MMU_CHIP	MMU_DE	XTR_CHIP	XTR_DE	CIONA	SPU_CHIP	SPU_DE	NVE_CHIP	NVE_DE	COW	MMU	XTR	SPU	NVE
ENSMUSG00000000001	OMA05078	No	No	No	No	Yes	NA	NA	NA	NA	NA	Gnai3 guanine nucleotide binding protein (G protein), alpha inhibiting 3	guanine nucleotide-binding protein G(k) subunit alpha	NA	NA
ENSMUSG00000000031	NA	No	Act:-5.55	NA	NA	NA	NA	NA	NA	NA	NA	H19 H19, imprinted maternally expressed transcript	NA	NA	NA
ENSMUSG00000000037	NA	Yes	No	NA	NA	NA	NA	NA	NA	NA	NA	Scml2 sex comb on midleg-like 2 (Drosophila)	NA	NA	NA
ENSMUSG00000000058	OMA18057	No	No	No	Act:-2.31	NA	NA	NA	NA	NA	NA	Cav2 caveolin 2	caveolin-2	NA	NA
ENSMUSG00000000078	OMA09663	Yes	No	Yes	No	Yes	NA	NA	No	No	NA	Klf6 Kruppel-like factor 6	Krueppel-like factor 6	NA	Klf6/7
ENSMUSG00000000088	OMA15822	No	No	No	No	No	No	Act:-0.62	No	No	No	Cox5a cytochrome c oxidase subunit Va	cytochrome c oxidase subunit 5A, mitochondrial	cytochrome c oxidase subunit 5A, mitochondrial	Cytochrome c oxidase subunit 5A, mitochondrial;
ENSMUSG00000000093	OMA03416	No	No	Yes	No	No	NA	NA	NA	NA	NA	Tbx2 T-box 2	T-box transcription factor TBX2	NA	NA
ENSMUSG00000000094	OMA03244	No	Act:-1.85	No	No	NA	No	No	No	No	NA	Tbx4 T-box 4	PREDICTED: T-box transcription factor TBX4	T-box transcription factor TBX3 isoform X1	Tbx4/5
ENSMUSG00000000103	NA	Yes	No	NA	NA	NA	NA	NA	NA	NA	NA	Zfy2 zinc finger protein 2, Y-linked	NA	NA	NA
ENSMUSG00000000125	OMA05134	No	No	No	No	NA	No	No	Yes	Act:-1.06	NA	Wnt3 wingless-type MMTV integration site family, member 3	proto-oncogene Wnt-3	proto-oncogene Wnt-3	NvWnt3
ENSMUSG00000000126	OMA07117	No	No	Yes	No	NA	Yes	No	NA	NA	NA	Wnt9a wingless-type MMTV integration site family, member 9A	PREDICTED: protein Wnt-9a	protein Wnt-9a	NA
ENSMUSG00000000127	OMA01685	Yes	No	No	No	NA	NA	NA	No	No	No	Fer fer (fms/fps related) protein kinase	tyrosine-protein kinase Fer	NA	protein-tyrosine kinase HTK98 [Hydra vulgaris]
ENSMUSG00000000131	OMA00791	Yes	No	Yes	No	No	No	No	No	No	No	Xpo6 exportin 6	PREDICTED: exportin-6	exportin-6 isoform X1	KIAA0370 protein [Homo sapiens]
ENSMUSG00000000134	OMA16428	No	No	Yes	No	NA	NA	NA	NA	NA	NA	Tfe3 transcription factor E3	PREDICTED: transcription factor EC isoform X1	NA	NA
ENSMUSG00000000157	OMA17972	No	No	NA	NA	Yes	NA	NA	NA	NA	NA	Itgb2l integrin beta 2-like	NA	NA	NA
ENSMUSG00000000171	OMA19115	No	No	No	No	NA	No	Act:-0.45	NA	NA	No	Sdhd succinate dehydrogenase complex, subunit D, integral membrane protein	succinate dehydrogenase	succinate dehydrogenase	NA
ENSMUSG00000000183	OMA16611	No	No	No	Act:-2.87	NA	NA	NA	NA	NA	NA	Fgf6 fibroblast growth factor 6	fibroblast growth factor 6 precursor	NA	NA
ENSMUSG00000000184	OMA08820	No	No	No	No	Yes	No	No	Yes	No	NA	Ccnd2 cyclin D2	PREDICTED: G1/S-specific cyclin-D2 isoform X1	cyclin D	cyclin D [Saccoglossus kowalevskii]
ENSMUSG00000000247	OMA04719	No	No	No	No	Yes	No	No	Yes	No	NA	Lhx2 LIM homeobox protein 2	PREDICTED: LIM/homeobox protein Lhx2 isoform X1	LIM/homeobox protein Lhx9	LIM/homeobox protein Lhx9-like [Exaiptasia pallida]
ENSMUSG00000000253	OMA06811	No	No	No	Act:-1.03	NA	No	No	NA	NA	NA	Gmpr guanosine monophosphate reductase	GMP reductase 1	GMP reductase 1-like isoform X1	NA
ENSMUSG00000000263	OMA03883	Yes	No	No	No	NA	No	No	No	No	NA	Glra1 glycine receptor, alpha 1 subunit	PREDICTED: glycine receptor subunit alpha-1	gamma-aminobutyric acid receptor subunit alpha-5-like	glycine receptor subunit alpha-1 isoform 1 precursor [Mus musculus]
ENSMUSG00000000276	OMA04275	No	No	No	No	NA	No	Rep:0.64	NA	NA	NA	Dgke diacylglycerol kinase, epsilon	PREDICTED: diacylglycerol kinase epsilon isoform X1	diacylglycerol kinase theta isoform X6	NA
ENSMUSG00000000290	OMA04855	No	Act:-7.95	No	No	NA	NA	NA	No	Rep:1.02	NA	Itgb2 integrin beta 2	PREDICTED: integrin beta-2 isoform X1	NA	Itgb5 protein [Danio rerio]
ENSMUSG00000000296	OMA15707	Yes	No	No	No	NA	No	No	NA	NA	NA	Tpd52l1 tumor protein D52-like 1	PREDICTED: tumor protein D53 isoform X1	tumor protein D52 isoform X3	NA
ENSMUSG00000000301	OMA17297	No	No	Yes	No	NA	No	No	NA	NA	No	Pemt phosphatidylethanolamine N-methyltransferase	phosphatidylethanolamine N-methyltransferase	phosphatidylethanolamine N-methyltransferase-like	NA
ENSMUSG00000000303	OMA04758	Yes	No	No	No	No	NA	NA	NA	NA	NA	Cdh1 cadherin 1	PREDICTED: cadherin-1	NA	NA
ENSMUSG00000000305	OMA03022	Yes	No	No	No	NA	NA	NA	No	No	NA	Cdh4 cadherin 4	cadherin 4 precursor	NA	cadherin EGF LAG seven-pass G-type receptor [Cricetulus griseus]
ENSMUSG00000000308	OMA05285	No	No	No	No	No	No	No	No	Act:-1.96	NA	Ckmt1 creatine kinase, mitochondrial 1, ubiquitous	creatine kinase U-type, mitochondrial	creatine kinase U-type, mitochondrial	mitochondrial creatine kinase [Siphonosoma cumanense]
ENSMUSG00000000326	OMA15373	No	No	No	No	Yes	No	No	NA	NA	No	Comt catechol-O-methyltransferase	catechol-O-methyltransferase	catechol O-methyltransferase	NA
ENSMUSG00000000339	OMA07913	No	No	No	No	Yes	No	No	No	No	No	Rtca RNA 3'-terminal phosphate cyclase	RNA 3'-terminal phosphate cyclase	RNA 3'-terminal phosphate cyclase-like	MGC84552 protein [Xenopus laevis]
ENSMUSG00000000355	OMA10563	No	No	No	No	No	No	Act:-0.89	No	No	No	Mcts1 malignant T cell amplified sequence 1	malignant T-cell-amplified sequence 1	malignant T-cell-amplified sequence 1	malignant T cell amplified sequence 1 [Branchiostoma belcheri tsingtauense]
ENSMUSG00000000359	OMA16363	No	No	No	No	NA	No	Rep:4.90	NA	NA	NA	Rem1 rad and gem related GTP binding protein 1	GTP-binding protein REM 1	GTP-binding protein REM 1	NA
ENSMUSG00000000385	OMA13544	Yes	No	No	No	NA	No	No	No	No	NA	Tmprss2 transmembrane protease, serine 2	PREDICTED: transmembrane protease serine 2-like	transmembrane protease serine 9	airway trypsin-like protease precursor short isoform [Mus musculus]
ENSMUSG00000000402	OMA12035	No	No	No	Act:-1.79	NA	NA	NA	NA	NA	NA	Egfl6 EGF-like-domain, multiple 6	PREDICTED: epidermal growth factor-like protein 6 isoform X1	NA	NA
ENSMUSG00000000409	OMA04832	No	No	Yes	No	NA	NA	NA	NA	NA	NA	Lck lymphocyte protein tyrosine kinase	PREDICTED: tyrosine-protein kinase Lck	NA	NA
ENSMUSG00000000416	OMA01411	No	No	No	No	NA	No	Rep:0.81	NA	NA	NA	Cttnbp2 cortactin binding protein 2	PREDICTED: cortactin-binding protein 2 isoform X1	cortactin-binding protein 2 isoform X1	NA
ENSMUSG00000000420	OMA03555	Yes	No	No	No	NA	No	No	No	Rep:1.01	NA	Galnt1 UDP-N-acetyl-alpha-D-galactosamine:polypeptide N-acetylgalactosaminyltransferase 1	polypeptide N-acetylgalactosaminyltransferase 1	polypeptide N-acetylgalactosaminyltransferase 1 isoform X2	UDP-N-acetyl-alpha-D-galactosamine:polypeptide N-acetylgalactosaminyltransferase 1 [Mus musculus]
ENSMUSG00000000435	OMA12099	No	No	Yes	Act:-1.18	NA	NA	NA	NA	NA	NA	Myf5 myogenic factor 5	myogenic factor 5	NA	NA
ENSMUSG00000000530	OMA07797	No	No	No	No	NA	No	Rep:1.06	NA	NA	NA	Acvrl1 activin A receptor, type II-like 1	PREDICTED: serine/threonine-protein kinase receptor R3	activin receptor type-1 isoform X1	NA
ENSMUSG00000000531	OMA13690	No	No	No	No	NA	No	Act:-2.78	NA	NA	NA	Grasp GRP1 (general receptor for phosphoinositides 1)-associated scaffold protein	general receptor for phosphoinositides 1-associated scaffold protein	general receptor for phosphoinositides 1-associated scaffold protein isoform X2	NA
ENSMUSG00000000532	OMA03790	Yes	No	Yes	No	No	No	Rep:1.14	Yes	No	NA	Acvr1b activin A receptor, type 1B	activin receptor type-1B precursor	TGF-beta receptor type-1	TGF-beta receptor type-1-like [Exaiptasia pallida]
ENSMUSG00000000555	OMA02275	No	No	Yes	No	NA	No	Rep:1.28	NA	NA	NA	Itga5 integrin alpha 5 (fibronectin receptor alpha)	PREDICTED: integrin alpha-5	integrin alpha-V	NA
ENSMUSG00000000562	OMA14950	Yes	No	No	No	NA	No	No	No	No	NA	Adora3 adenosine A3 receptor	PREDICTED: adenosine receptor A3-like	adenosine receptor A2a-like	Adrenocorticotropic hormone receptor;
ENSMUSG00000000605	OMA01102	No	No	No	No	NA	No	Rep:0.70	NA	NA	NA	Clcn4 chloride channel, voltage-sensitive 4	H(+)/Cl(-) exchange transporter 4	H(+)/Cl(-) exchange transporter 3 isoform X1	NA
ENSMUSG00000000628	OMA01092	No	No	Yes	No	Yes	No	No	NA	NA	NA	Hk2 hexokinase 2	PREDICTED: hexokinase-2	hexokinase-2 isoform X1	NA
ENSMUSG00000000673	OMA13880	No	No	Yes	No	No	No	No	No	No	No	Haao 3-hydroxyanthranilate 3,4-dioxygenase	3-hydroxyanthranilate 3,4-dioxygenase	3-hydroxyanthranilate 3,4-dioxygenase	3-hydroxyanthranilate 3,4-dioxygenase {ECO:0000255|HAMAP-Rule:MF_03019};
ENSMUSG00000000686	OMA10708	No	No	No	No	NA	No	No	No	No	NA	Abhd15 abhydrolase domain containing 15	PREDICTED: protein ABHD15	protein ABHD15	Abhydrolase domain-containing protein 15 [Crassostrea gigas]
ENSMUSG00000000711	OMA09545	No	No	No	No	Yes	No	No	No	No	No	Rab5b RAB5B, member RAS oncogene family	ras-related protein Rab-5B	ras-related protein Rab-5B	Rab5 protein [Aiptasia pulchella]
ENSMUSG00000000740	OMA10473	No	No	No	No	No	No	Act:-1.37	No	No	No	Rpl13 ribosomal protein L13	60S ribosomal protein L13	60S ribosomal protein L13	60S ribosomal protein L13;
ENSMUSG00000000753	OMA10746	No	No	No	Rep:1.20	NA	NA	NA	NA	NA	NA	Serpinf1 serine (or cysteine) peptidase inhibitor, clade F, member 1	pigment epithelium-derived factor precursor	NA	NA
ENSMUSG00000000759	OMA01048	Yes	No	No	No	No	No	No	No	No	No	Tubgcp3 tubulin, gamma complex associated protein 3	gamma-tubulin complex component 3	gamma-tubulin complex component 3	tubulin, gamma complex associated protein 3 [Xenopus (Silurana) tropicalis]
ENSMUSG00000000766	OMA06226	Yes	No	No	No	No	No	No	NA	NA	NA	Oprm1 opioid receptor, mu 1	PREDICTED: mu-type opioid receptor	somatostatin receptor type 4	NA
ENSMUSG00000000776	OMA09887	No	No	No	No	No	No	No	No	Rep:1.34	NA	Polr3d polymerase (RNA) III (DNA directed) polypeptide D	DNA-directed RNA polymerase III subunit RPC4	DNA-directed RNA polymerase III subunit RPC4 isoform X2	DNA-directed RNA polymerase III subunit RPC4 [Homo sapiens]
ENSMUSG00000000787	OMA02212	No	No	No	No	No	No	Act:-0.58	No	No	No	Ddx3x DEAD/H (Asp-Glu-Ala-Asp/His) box polypeptide 3, X-linked	ATP-dependent RNA helicase DDX3X	putative ATP-dependent RNA helicase Pl10	PL10
ENSMUSG00000000792	OMA05582	No	No	No	Act:-2.07	NA	NA	NA	NA	NA	NA	Slc5a5 solute carrier family 5 (sodium iodide symporter), member 5	sodium/iodide cotransporter precursor	NA	NA
ENSMUSG00000000794	OMA08248	No	No	No	No	Yes	NA	NA	NA	NA	NA	Kcnn3 potassium intermediate/small conductance calcium-activated channel, subfamily N, member 3	PREDICTED: small conductance calcium-activated potassium channel protein 3	NA	NA
ENSMUSG00000000804	OMA00300	Yes	No	No	No	Yes	No	No	No	No	NA	Usp32 ubiquitin specific peptidase 32	PREDICTED: ubiquitin carboxyl-terminal hydrolase 32 isoform X1	ubiquitin carboxyl-terminal hydrolase 32 isoform X1	CG8334, isoform D [Drosophila melanogaster]
ENSMUSG00000000817	OMA18629	Yes	No	No	No	NA	NA	NA	NA	NA	NA	Fasl Fas ligand (TNF superfamily, member 6)	PREDICTED: tumor necrosis factor ligand superfamily member 6 isoform X1	NA	NA
ENSMUSG00000000861	OMA01161	Yes	No	No	No	NA	No	No	NA	NA	NA	Bcl11a B cell CLL/lymphoma 11A (zinc finger protein)	B-cell lymphoma/leukemia 11A	B-cell lymphoma/leukemia 11A, partial	NA
ENSMUSG00000000884	OMA13954	No	No	No	No	NA	No	No	No	Rep:1.18	No	Gnb1l guanine nucleotide binding protein (G protein), beta polypeptide 1-like	guanine nucleotide-binding protein subunit beta-like protein 1	guanine nucleotide-binding protein subunit beta-like protein 1	Guanine nucleotide-binding protein subunit beta-like 1 [Picoides pubescens]
ENSMUSG00000000901	OMA08086	No	No	No	No	NA	No	No	No	Rep:1.26	NA	Mmp11 matrix metallopeptidase 11	PREDICTED: stromelysin-3 isoform X1	matrilysin-like	Collagenase 3 precursor [Salmo salar]
ENSMUSG00000000915	OMA01328	No	No	No	No	NA	No	No	No	No	Yes	Hip1r huntingtin interacting protein 1 related	huntingtin-interacting protein 1-related protein	huntingtin-interacting protein 1 isoform X2	Huntingtin-interacting protein 1 [Crassostrea gigas]
ENSMUSG00000000934	NA	Yes	No	NA	NA	NA	NA	NA	NA	NA	NA	Top1mt DNA topoisomerase 1, mitochondrial	NA	NA	NA
ENSMUSG00000000942	OMA17386	No	No	No	No	Yes	NA	NA	NA	NA	NA	Hoxa4 homeobox A4	PREDICTED: homeobox protein Hox-A4	NA	NA
ENSMUSG00000000958	OMA04299	No	No	No	No	No	NA	NA	Yes	No	NA	Slc7a7 solute carrier family 7 (cationic amino acid transporter, y+ system), member 7	Y+L amino acid transporter 1	NA	B(0,+)-type amino acid transporter 1 [Homo sapiens]
ENSMUSG00000000982	OMA27837	No	No	No	Rep:1.89	NA	NA	NA	NA	NA	NA	Ccl3 chemokine (C-C motif) ligand 3	PREDICTED: C-C motif chemokine 4 homolog	NA	NA
ENSMUSG00000001018	OMA22071	No	No	NA	NA	No	No	Rep:0.93	No	No	No	Snapin SNAP-associated protein	NA	SNARE-associated protein Snapin	SNARE-associated protein Snapin [Bos taurus]
ENSMUSG00000001027	OMA00305	No	Act:-7.20	No	No	Yes	No	Act:-1.01	NA	NA	NA	Scn4a sodium channel, voltage-gated, type IV, alpha	PREDICTED: sodium channel protein type 4 subunit alpha	sodium channel protein 60E isoform X1	NA
ENSMUSG00000001034	OMA05389	No	No	No	No	Yes	No	No	Yes	No	No	Mapk7 mitogen-activated protein kinase 7	mitogen-activated protein kinase 7	cyclin-dependent kinase-like 5 isoform X1	Mitogen-activated protein kinase 7;
ENSMUSG00000001052	OMA01774	No	No	No	No	No	No	Rep:0.66	NA	NA	NA	Sec24b Sec24 related gene family, member B (S. cerevisiae)	PREDICTED: protein transport protein Sec24B isoform X1	protein transport protein Sec24A isoform X1	NA
ENSMUSG00000001053	OMA15544	No	No	No	No	NA	No	Act:-0.76	NA	NA	NA	N4bp3 NEDD4 binding protein 3	PREDICTED: NEDD4-binding protein 3	polyamine-modulated factor 1-binding protein 1 isoform X1	NA
ENSMUSG00000001056	OMA17078	Yes	No	No	No	NA	No	No	No	No	No	Nhp2 NHP2 ribonucleoprotein	H/ACA ribonucleoprotein complex subunit 2-like protein	H/ACA ribonucleoprotein complex subunit 2-like protein	Nhp2 H/ACA snoRNP protein [Candida orthopsilosis Co 90-125]
ENSMUSG00000001062	OMA08778	No	No	No	No	NA	No	Act:-0.73	No	No	NA	Vps9d1 VPS9 domain containing 1	VPS9 domain-containing protein 1	VPS9 domain-containing protein 1	VPS9 domain containing 1 [Danio rerio]
ENSMUSG00000001103	OMA25220	No	No	Yes	No	NA	NA	NA	NA	NA	NA	Sebox SEBOX homeobox	PREDICTED: homeobox protein SEBOX isoform X1	NA	NA
ENSMUSG00000001127	OMA16146	Yes	No	No	No	NA	NA	NA	NA	NA	NA	Araf Araf proto-oncogene, serine/threonine kinase	PREDICTED: serine/threonine-protein kinase A-Raf-like	NA	NA
ENSMUSG00000001143	OMA09405	Yes	No	No	No	NA	NA	NA	No	No	NA	Lman2l lectin, mannose-binding 2-like	VIP36-like protein	NA	PREDICTED: vesicular integral-membrane protein VIP36 [Microplitis demolitor]
ENSMUSG00000001150	OMA02645	No	No	No	No	No	No	Rep:0.49	No	No	NA	Mcm3ap minichromosome maintenance complex component 3 associated protein	PREDICTED: germinal-center associated nuclear protein isoform X1	germinal-center associated nuclear protein	80 kDa MCM3-associated protein [Crassostrea gigas]
ENSMUSG00000001151	OMA05794	No	No	No	No	NA	No	Act:-0.36	Yes	No	NA	Pcnt pericentrin (kendrin)	PREDICTED: pericentrin isoform X1	A-kinase anchor protein 9 isoform X5	A-kinase anchor protein 9;
ENSMUSG00000001156	OMA13230	No	No	No	No	Yes	No	No	Yes	No	NA	Mxd1 MAX dimerization protein 1	max dimerization protein 1	max-interacting protein 1 isoform X1	max dimerization protein 4 [Gallus gallus]
ENSMUSG00000001158	OMA15913	No	No	Yes	No	NA	No	No	NA	NA	NA	Snrnp27 small nuclear ribonucleoprotein 27 (U4/U6.U5)	U4/U6.U5 small nuclear ribonucleoprotein 27 kDa protein	U4/U6.U5 small nuclear ribonucleoprotein 27 kDa protein	NA
ENSMUSG00000001173	OMA01986	No	No	No	No	Yes	No	Rep:0.48	No	No	No	Ocrl OCRL, inositol polyphosphate-5-phosphatase	PREDICTED: inositol polyphosphate 5-phosphatase OCRL-1 isoform X1	inositol polyphosphate 5-phosphatase OCRL isoform X3	Type II inositol-1,4,5-trisphosphate 5-phosphatase [Zootermopsis nevadensis]
ENSMUSG00000001175	OMA11836	No	No	No	No	No	No	No	No	No	Yes	Calm1 calmodulin 1	PREDICTED: calmodulin isoform X1	calmodulin isoform X2	Calmodulin [Tupaia chinensis]
ENSMUSG00000001211	OMA06096	Yes	No	No	No	Yes	No	No	No	No	No	Agpat3 1-acylglycerol-3-phosphate O-acyltransferase 3	1-acyl-sn-glycerol-3-phosphate acyltransferase gamma	1-acyl-sn-glycerol-3-phosphate acyltransferase gamma	1-acyl-sn-glycerol-3-phosphate acyltransferase delta [Danio rerio]
ENSMUSG00000001225	OMA03596	No	No	No	Act:-1.91	No	No	No	NA	NA	NA	Slc26a3 solute carrier family 26, member 3	PREDICTED: chloride anion exchanger-like	sulfate transporter isoform X2	NA
ENSMUSG00000001227	OMA05494	No	No	No	No	Yes	No	No	NA	NA	NA	Sema6b sema domain, transmembrane domain (TM), and cytoplasmic domain, (semaphorin) 6B	PREDICTED: semaphorin-6B isoform X1	semaphorin-6D-like isoform X6	NA
ENSMUSG00000001228	OMA03898	No	No	No	No	NA	No	Act:-0.98	No	No	NA	Uhrf1 ubiquitin-like, containing PHD and RING finger domains, 1	PREDICTED: E3 ubiquitin-protein ligase UHRF1	E3 ubiquitin-protein ligase UHRF1 isoform X2	E3 ubiquitin-protein ligase UHRF1 [Xenopus laevis]
ENSMUSG00000001229	OMA02079	No	No	No	No	NA	No	Rep:1.32	NA	NA	NA	Dpp9 dipeptidylpeptidase 9	dipeptidyl peptidase 9	dipeptidyl peptidase 9	NA
ENSMUSG00000001248	OMA07320	No	No	No	No	Yes	No	No	NA	NA	NA	Gramd1a GRAM domain containing 1A	PREDICTED: GRAM domain-containing protein 1A	protein Aster-B	NA
ENSMUSG00000001280	OMA03577	No	No	Yes	No	NA	NA	NA	NA	NA	NA	Sp1 trans-acting transcription factor 1	transcription factor Sp1	NA	NA
ENSMUSG00000001288	OMA04519	No	No	Yes	No	NA	NA	NA	NA	NA	NA	Rarg retinoic acid receptor, gamma	PREDICTED: retinoic acid receptor gamma isoform X1	NA	NA
ENSMUSG00000001300	OMA07818	No	No	Yes	No	Yes	No	Act:-1.97	Yes	No	NA	Efnb2 ephrin B2	ephrin-B2	ephrin-B1	Ephrin-B2a;
ENSMUSG00000001305	OMA16391	No	No	No	No	No	No	Act:-1.32	No	No	NA	Rrp15 ribosomal RNA processing 15 homolog (S. cerevisiae)	PREDICTED: RRP15-like protein	RRP15-like protein	RRP15-like protein [Cricetulus griseus]
ENSMUSG00000001376	OMA00957	No	No	No	No	No	No	Rep:0.64	No	No	No	Vps50 VPS50 EARP/GARPII complex subunit	syndetin isoform 1	syndetin	Coiled-coil domain-containing protein 132 [Calypte anna]
ENSMUSG00000001403	OMA14853	No	No	No	No	Yes	No	No	No	No	No	Ube2c ubiquitin-conjugating enzyme E2C	ubiquitin-conjugating enzyme E2 C	ubiquitin-conjugating enzyme E2 C	ubiquitin-conjugating enzyme E2C isoform 4 [Salpingoeca rosetta]
ENSMUSG00000001416	OMA02975	No	No	No	No	No	No	Act:-0.79	No	No	No	Cct3 chaperonin containing Tcp1, subunit 3 (gamma)	T-complex protein 1 subunit gamma	T-complex protein 1 subunit gamma	T-complex protein 1 subunit gamma [Crassostrea gigas]
ENSMUSG00000001418	OMA17671	No	No	No	No	NA	No	No	Yes	No	No	Glmp glycosylated lysosomal membrane protein	PREDICTED: glycosylated lysosomal membrane protein	glycosylated lysosomal membrane protein A	Lysosomal protein NCU-G1 [Cerapachys biroi]
ENSMUSG00000001419	OMA05409	No	No	No	No	NA	NA	NA	NA	NA	NA	Mef2d myocyte enhancer factor 2D	myocyte-specific enhancer factor 2D	NA	NA
ENSMUSG00000001424	OMA02454	Yes	No	Yes	No	Yes	No	No	No	Rep:1.52	No	Snd1 staphylococcal nuclease and tudor domain containing 1	staphylococcal nuclease domain-containing protein 1	staphylococcal nuclease domain-containing protein 1 isoform X1	staphylococcal nuclease domain-containing protein 1 [Pongo abelii]
ENSMUSG00000001435	OMA02156	No	No	Yes	No	NA	NA	NA	NA	NA	NA	Col18a1 collagen, type XVIII, alpha 1	PREDICTED: collagen alpha-1(XVIII) chain isoform X1	NA	NA
ENSMUSG00000001436	OMA10158	Yes	No	No	No	NA	NA	NA	NA	NA	NA	Slc19a1 solute carrier family 19 (folate transporter), member 1	PREDICTED: folate transporter 1	NA	NA
ENSMUSG00000001440	OMA00759	No	No	No	No	No	No	No	No	No	Yes	Kpnb1 karyopherin (importin) beta 1	PREDICTED: importin subunit beta-1 isoform X1	importin subunit beta-1	importin subunit beta-1 isoform 1 [Homo sapiens]
ENSMUSG00000001441	OMA01059	Yes	No	No	No	NA	No	No	No	No	No	Npepps aminopeptidase puromycin sensitive	aminopeptidase puromycin sensitive	puromycin-sensitive aminopeptidase	puromycin-sensitive aminopeptidase [Saccoglossus kowalevskii]
ENSMUSG00000001493	OMA24176	No	Act:-2.71	NA	NA	No	NA	NA	NA	NA	NA	Meox1 mesenchyme homeobox 1	NA	NA	NA
ENSMUSG00000001496	OMA19424	No	No	NA	NA	Yes	NA	NA	NA	NA	NA	Nkx2-1 NK2 homeobox 1	NA	NA	NA
ENSMUSG00000001497	OMA07232	No	No	Yes	No	Yes	No	No	NA	NA	NA	Pax9 paired box 9	PREDICTED: paired box protein Pax-9	paired box protein Pax-1-like	NA
ENSMUSG00000001506	OMA00440	No	No	No	Act:-1.21	Yes	NA	NA	No	No	NA	Col1a1 collagen, type I, alpha 1	collagen alpha-1(I) chain precursor	NA	fibrillar collagen [Hydra vulgaris]
ENSMUSG00000001508	OMA15300	No	No	No	Act:-1.09	NA	No	No	NA	NA	NA	Sgca sarcoglycan, alpha (dystrophin-associated glycoprotein)	PREDICTED: alpha-sarcoglycan	epsilon-sarcoglycan-like isoform X1	NA
ENSMUSG00000001521	OMA11326	No	No	No	No	NA	No	Rep:0.90	No	No	NA	Tulp3 tubby-like protein 3	tubby-related protein 1	tubby-related protein 3	tubby bipartite transcription factor [Xenopus (Silurana) tropicalis]
ENSMUSG00000001525	OMA02685	No	No	No	Act:-1.02	No	No	No	NA	NA	No	Tubb5 tubulin, beta 5 class I	tubulin beta chain	LOW QUALITY PROTEIN: tubulin beta chain	NA
ENSMUSG00000001542	OMA04643	No	No	Yes	No	Yes	Yes	Rep:0.87	No	No	NA	Ell2 elongation factor RNA polymerase II 2	PREDICTED: RNA polymerase II elongation factor ELL2 isoform X1	RNA polymerase II elongation factor ELL	RNA polymerase II elongation factor ELL [Myotis davidii]
ENSMUSG00000001555	OMA04639	No	No	Yes	No	NA	NA	NA	NA	NA	NA	Fkbp10 FK506 binding protein 10	peptidyl-prolyl cis-trans isomerase FKBP10 precursor	NA	NA
ENSMUSG00000001566	OMA19800	Yes	No	No	No	NA	NA	NA	NA	NA	NA	Mnx1 motor neuron and pancreas homeobox 1	PREDICTED: motor neuron and pancreas homeobox protein 1-like	NA	NA
ENSMUSG00000001576	OMA07982	No	No	Yes	No	No	No	No	No	No	NA	Ergic1 endoplasmic reticulum-golgi intermediate compartment (ERGIC) 1	PREDICTED: endoplasmic reticulum-Golgi intermediate compartment protein 1	endoplasmic reticulum-Golgi intermediate compartment protein 1	endoplasmic reticulum-Golgi intermediate compartment protein 1 [Danio rerio]
ENSMUSG00000001583	OMA20076	No	No	NA	NA	Yes	NA	NA	NA	NA	No	Tnk1 tyrosine kinase, non-receptor, 1	NA	NA	NA
ENSMUSG00000001604	OMA13788	No	Rep:1.23	No	No	NA	No	No	NA	NA	NA	Tcea3 transcription elongation factor A (SII), 3	PREDICTED: transcription elongation factor A protein 3 isoform X1	transcription elongation factor S-II isoform X2	NA
ENSMUSG00000001627	OMA07608	No	No	No	No	No	No	Rep:0.65	No	No	No	Ifrd1 interferon-related developmental regulator 1	interferon-related developmental regulator 1	interferon-related developmental regulator 2	Interferon-related developmental regulator 2 [Chelonia mydas]
ENSMUSG00000001630	OMA03177	Yes	No	No	No	No	No	No	No	No	No	Stk38l serine/threonine kinase 38 like	serine/threonine kinase 38 like	serine/threonine-protein kinase tricorner	Serine/threonine-protein kinase 38-like protein [Crassostrea gigas]
ENSMUSG00000001642	OMA09735	No	No	No	No	No	No	Act:-1.31	No	No	NA	Akr1b3 aldo-keto reductase family 1, member B3 (aldose reductase)	aldose reductase	aldo-keto reductase family 1 member A1	Alcohol dehydrogenase [NADP(+)] [Pterocles gutturalis]
ENSMUSG00000001655	OMA09207	No	No	No	Act:-2.70	NA	NA	NA	NA	NA	NA	Hoxc13 homeobox C13	PREDICTED: homeobox protein Hox-C13	NA	NA
ENSMUSG00000001657	OMA08291	No	No	Yes	No	NA	NA	NA	NA	NA	NA	Hoxc8 homeobox C8	homeobox protein Hox-C8	NA	NA
ENSMUSG00000001665	OMA17307	No	No	No	No	NA	No	No	Yes	No	Yes	Gstt3 glutathione S-transferase, theta 3	PREDICTED: glutathione S-transferase theta-1	glutathione S-transferase theta-1	Glutathione S-transferase theta-1 [Crassostrea gigas]
ENSMUSG00000001666	OMA20294	No	No	No	No	NA	No	Act:-2.36	NA	NA	NA	Ddt D-dopachrome tautomerase	D-dopachrome decarboxylase	D-dopachrome decarboxylase	NA
ENSMUSG00000001670	OMA05770	Yes	No	No	No	NA	No	No	No	No	Yes	Tat tyrosine aminotransferase	tyrosine aminotransferase	tyrosine aminotransferase	tyrosine aminotransferase [Neovison vison]
ENSMUSG00000001674	OMA03462	Yes	No	No	No	No	No	No	No	No	Yes	Ddx18 DEAD (Asp-Glu-Ala-Asp) box polypeptide 18	ATP-dependent RNA helicase DDX18	ATP-dependent RNA helicase HAS1	uncharacterized protein LOC414715 [Xenopus laevis]
ENSMUSG00000001687	OMA14970	Yes	No	No	No	NA	No	No	No	No	NA	Ubl3 ubiquitin-like 3	ubiquitin-like protein 3	ubiquitin-like protein 3	ubiquitin-like 3 [Xenopus laevis]
ENSMUSG00000001729	OMA03080	No	No	Yes	No	No	No	No	No	No	No	Akt1 thymoma viral proto-oncogene 1	PREDICTED: RAC-alpha serine/threonine-protein kinase isoform X1	RAC-gamma serine/threonine-protein kinase	protein kinase B [Hydra vulgaris]
ENSMUSG00000001751	OMA06000	No	No	No	No	NA	No	No	No	No	Yes	Naglu alpha-N-acetylglucosaminidase (Sanfilippo disease IIIB)	PREDICTED: alpha-N-acetylglucosaminidase	alpha-N-acetylglucosaminidase-like	lysosomal alpha-N-acetyl glucosaminidase [Dromaius novaehollandiae]
ENSMUSG00000001767	OMA01574	No	No	No	No	NA	No	No	No	Act:-1.47	No	Crnkl1 Crn, crooked neck-like 1 (Drosophila)	crooked neck-like protein 1	crooked neck-like protein 1	PREDICTED: crooked neck-like protein 1 isoform X2 [Heterocephalus glaber]
ENSMUSG00000001773	OMA03368	Yes	No	No	No	No	No	Rep:1.80	No	No	No	Folh1 folate hydrolase 1	PREDICTED: putative N-acetylated-alpha-linked acidic dipeptidase	glutamate carboxypeptidase 2	N-acetylated-alpha-linked acidic dipeptidase 2 [Myotis brandtii]
ENSMUSG00000001774	OMA07916	Yes	No	No	No	No	No	No	No	No	No	Chordc1 cysteine and histidine-rich domain (CHORD)-containing, zinc-binding protein 1	cysteine and histidine-rich domain-containing protein 1	cysteine and histidine-rich domain-containing protein 1-like	cysteine and histidine-rich domain-containing protein 1 [Danio rerio]
ENSMUSG00000001783	OMA02605	No	No	No	No	No	No	Rep:2.48	No	No	No	Rtcb RNA 2',3'-cyclic phosphate and 5'-OH ligase	tRNA-splicing ligase RtcB homolog	tRNA-splicing ligase RtcB homolog	tRNA-splicing ligase RtcB-like protein [Camelus ferus]
ENSMUSG00000001786	OMA12395	No	No	No	No	Yes	No	No	No	No	NA	Fbxo7 F-box protein 7	F-box only protein 7	F-box only protein 7 isoform X1	F-box only protein 7 [Rattus norvegicus]
ENSMUSG00000001804	OMA09030	Yes	No	No	No	NA	NA	NA	NA	NA	NA	Dsg4 desmoglein 4	PREDICTED: desmoglein-1-beta	NA	NA
ENSMUSG00000001815	OMA07108	No	Act:-5.51	No	No	NA	Yes	No	NA	NA	NA	Evx2 even-skipped homeobox 2	PREDICTED: homeobox even-skipped homolog protein 2	even-skipped-like protein	NA
ENSMUSG00000001819	OMA09370	No	Act:-3.48	No	Act:-1.19	NA	NA	NA	NA	NA	NA	Hoxd13 homeobox D13	PREDICTED: homeobox protein Hox-D13	NA	NA
ENSMUSG00000001829	OMA04773	No	No	No	No	No	No	No	No	No	Yes	Clpb ClpB caseinolytic peptidase B	PREDICTED: caseinolytic peptidase B protein homolog	caseinolytic peptidase B protein homolog, partial	Caseinolytic peptidase B protein-like protein [Camponotus floridanus]
ENSMUSG00000001833	OMA03235	No	No	Yes	No	No	No	No	Yes	No	No	Sept7 septin 7	PREDICTED: septin-7 isoform X1	septin-7 isoform X3	septin-7 isoform 1 [Pongo abelii]
ENSMUSG00000001847	OMA09240	No	No	No	No	No	No	No	Yes	No	Yes	Rac1 RAS-related C3 botulinum substrate 1	ras-related C3 botulinum toxin substrate 1	ras-related C3 botulinum toxin substrate 1 (rho family, small GTP binding protein Rac1)-like	small GTPase Rac protein 1 [Ephydatia fluviatilis]
ENSMUSG00000001864	OMA18406	No	No	No	No	NA	No	No	Yes	No	NA	Aif1l allograft inflammatory factor 1-like	allograft inflammatory factor 1-like	allograft inflammatory factor 1-like	allograft inflammatory factor 1 [Crassostrea ariakensis]
ENSMUSG00000001870	OMA00706	Yes	No	Yes	No	NA	No	No	NA	NA	NA	Ltbp1 latent transforming growth factor beta binding protein 1	PREDICTED: latent-transforming growth factor beta-binding protein 1 isoform X1	fibrillin-1	NA
ENSMUSG00000001891	OMA03229	No	No	No	No	No	No	Act:-0.66	Yes	No	No	Ugp2 UDP-glucose pyrophosphorylase 2	UTP--glucose-1-phosphate uridylyltransferase	UTP--glucose-1-phosphate uridylyltransferase isoform X1	UTP--glucose-1-phosphate uridylyltransferase;
ENSMUSG00000001901	OMA02858	No	No	No	No	Yes	No	No	Yes	No	NA	Kcnh6 potassium voltage-gated channel, subfamily H (eag-related), member 6	PREDICTED: potassium voltage-gated channel subfamily H member 2 isoform X1	potassium voltage-gated channel subfamily H member 7 isoform X2	potassium voltage-gated channel subfamily H member 7 [Rattus norvegicus]
ENSMUSG00000001930	OMA00293	No	Act:-1.80	No	No	NA	No	No	No	No	NA	Vwf Von Willebrand factor	von Willebrand factor precursor	SCO-spondin-like	von Willebrand factor precursor [Xenopus (Silurana) tropicalis]
ENSMUSG00000001942	OMA10610	No	No	No	Rep:1.03	No	No	No	Yes	No	NA	Siae sialic acid acetylesterase	PREDICTED: sialate O-acetylesterase isoform X1	sialate O-acetylesterase isoform X1	Sialate O-acetylesterase;
ENSMUSG00000001985	OMA01019	Yes	No	No	No	NA	NA	NA	No	No	NA	Grik3 glutamate receptor, ionotropic, kainate 3	PREDICTED: glutamate receptor ionotropic, kainate 3	NA	NMDA receptor 2 [Drosophila melanogaster]
ENSMUSG00000001995	OMA00644	No	No	Yes	Act:-1.99	NA	No	Rep:0.78	NA	NA	NA	Sipa1l2 signal-induced proliferation-associated 1 like 2	PREDICTED: signal-induced proliferation-associated 1-like protein 2 isoform X1	signal-induced proliferation-associated 1-like protein 2 isoform X2	NA
ENSMUSG00000002014	OMA15240	No	No	No	No	No	No	Act:-0.91	No	No	No	Ssr4 signal sequence receptor, delta	PREDICTED: translocon-associated protein subunit delta isoform X1	translocon-associated protein subunit delta	Translocon-associated protein subunit delta [Crassostrea gigas]
ENSMUSG00000002033	OMA23821	No	No	No	Rep:1.92	NA	NA	NA	NA	NA	NA	Cd3g CD3 antigen, gamma polypeptide	T-cell surface glycoprotein CD3 gamma chain precursor	NA	NA
ENSMUSG00000002052	OMA00202	No	No	No	No	No	No	Rep:0.56	No	No	No	Supt6 suppressor of Ty 6	PREDICTED: transcription elongation factor SPT6	LOW QUALITY PROTEIN: transcription elongation factor SPT6	Transcription elongation factor SPT6 [Caprimulgus carolinensis]
ENSMUSG00000002058	OMA13128	No	No	No	No	NA	No	Rep:0.64	NA	NA	NA	Unc119 unc-119 lipid binding chaperone	PREDICTED: protein unc-119 homolog A	protein unc-119 homolog B-like	NA
ENSMUSG00000002059	OMA09952	No	No	Yes	No	NA	No	No	No	No	NA	Rab34 RAB34, member RAS oncogene family	ras-related protein Rab-34	ras-related protein Rab-34	ras-related protein Rab-36 [Mus musculus]
ENSMUSG00000002064	OMA13166	No	No	No	No	No	No	Rep:0.74	No	No	No	Sdf2 stromal cell derived factor 2	stromal cell-derived factor 2 precursor	stromal cell-derived factor 2	stromal cell-derived factor 2-like 1 precursor [Xenopus laevis]
ENSMUSG00000002076	OMA15026	Yes	No	No	No	NA	NA	NA	No	No	NA	Hsf2bp heat shock transcription factor 2 binding protein	PREDICTED: heat shock factor 2-binding protein	NA	heat shock factor 2-binding protein [Cricetulus griseus]
ENSMUSG00000002100	OMA01207	No	No	Yes	No	Yes	NA	NA	NA	NA	NA	Mybpc3 myosin binding protein C, cardiac	myosin-binding protein C, cardiac-type	NA	NA
ENSMUSG00000002102	OMA03782	No	No	No	No	No	No	Act:-0.60	No	No	No	Psmc3 proteasome (prosome, macropain) 26S subunit, ATPase 3	26S protease regulatory subunit 6A	26S proteasome regulatory subunit 6A-B	26S protease regulatory subunit 6A [Danaus plexippus]
ENSMUSG00000002104	OMA05563	No	No	No	No	Yes	No	No	NA	NA	NA	Rapsn receptor-associated protein of the synapse	43 kDa receptor-associated protein of the synapse	43 kDa receptor-associated protein of the synapse	NA
ENSMUSG00000002105	OMA12353	No	No	No	Act:-1.06	No	Yes	No	No	No	NA	Slc39a13 solute carrier family 39 (metal ion transporter), member 13	PREDICTED: zinc transporter ZIP13	zinc transporter ZIP13 isoform X1	solute carrier family 39 (zinc transporter), member 13 precursor [Callorhinchus milii]
ENSMUSG00000002107	OMA02800	Yes	No	Yes	No	No	No	No	No	No	NA	Celf2 CUGBP, Elav-like family member 2	CUGBP Elav-like family member 2	CUGBP Elav-like family member 3 isoform X6	bruno
ENSMUSG00000002129	OMA01341	No	No	No	No	NA	No	Rep:0.44	No	No	No	Sf3a1 splicing factor 3a, subunit 1	PREDICTED: splicing factor 3A subunit 1 isoform X1	splicing factor 3A subunit 1	splicing factor 3A subunit 1 [Macaca mulatta]
ENSMUSG00000002222	OMA04229	No	No	No	No	Yes	No	Rep:0.67	No	No	No	Rmnd5a required for meiotic nuclear division 5 homolog A	protein RMD5 homolog A	E3 ubiquitin-protein ligase RMND5A	RMD5-like protein A [Zootermopsis nevadensis]
ENSMUSG00000002228	NA	No	No	NA	NA	NA	NA	NA	NA	NA	NA	Ppm1j protein phosphatase 1J	NA	NA	NA
ENSMUSG00000002233	OMA10765	No	No	No	No	NA	No	Act:-1.04	NA	NA	NA	Rhoc ras homolog family member C	rho-related GTP-binding protein RhoC	ras homolog gene family, member C-like isoform X1	NA
ENSMUSG00000002279	OMA05042	Yes	No	Yes	No	NA	No	No	No	No	NA	Lmf1 lipase maturation factor 1	PREDICTED: lipase maturation factor 1	lipase maturation factor 1	Lipase maturation factor 1 [Crassostrea gigas]
ENSMUSG00000002280	OMA06115	No	No	No	No	NA	Yes	No	No	No	No	Narfl nuclear prelamin A recognition factor-like	cytosolic Fe-S cluster assembly factor narfl	cytosolic Fe-S cluster assembly factor narfl	nuclear prelamin A recognition factor-like [Gallus gallus]
ENSMUSG00000002297	OMA17339	No	No	Yes	No	NA	NA	NA	NA	NA	NA	Dbf4 DBF4 zinc finger	protein DBF4 homolog A	NA	NA
ENSMUSG00000002319	OMA04724	No	No	No	No	No	Yes	No	Yes	No	NA	Ipo4 importin 4	importin-4	importin-4	Importin-4 [Crassostrea gigas]
ENSMUSG00000002324	OMA13620	No	No	No	Rep:1.26	NA	No	No	No	No	NA	Rec8 REC8 meiotic recombination protein	meiotic recombination protein REC8 homolog	meiotic recombination protein REC8 homolog	Double-strand-break repair protein rad21 homolog;
ENSMUSG00000002325	OMA18808	No	No	No	No	No	NA	NA	No	Act:-1.01	NA	Irf9 interferon regulatory factor 9	PREDICTED: interferon regulatory factor 9 isoform X1	NA	Interferon regulatory factor 1 [Buceros rhinoceros silvestris]
ENSMUSG00000002326	OMA06517	No	No	No	No	No	No	No	No	No	NA	Gmpr2 guanosine monophosphate reductase 2	GMP reductase 2	GMP reductase 1-like isoform X1	GMP reductase 2 [Heterocephalus glaber]
ENSMUSG00000002329	OMA19591	No	No	NA	NA	No	NA	NA	Yes	No	NA	Mdp1 magnesium-dependent phosphatase 1	NA	NA	magnesium-dependent phosphatase 1 [Rattus norvegicus]
ENSMUSG00000002342	OMA08917	No	No	Yes	No	NA	NA	NA	NA	NA	NA	Tmem161a transmembrane protein 161A	transmembrane protein 161A precursor	NA	NA
ENSMUSG00000002346	OMA08785	No	No	No	No	NA	No	Rep:0.60	No	No	No	Slc25a42 solute carrier family 25, member 42	mitochondrial coenzyme A transporter SLC25A42	mitochondrial coenzyme A transporter SLC25A42	mitochondrial coenzyme A transporter SLC25A42 [Danio rerio]
ENSMUSG00000002365	OMA03804	No	No	No	No	Yes	No	No	NA	NA	NA	Snx9 sorting nexin 9	sorting nexin-9	sorting nexin-33 isoform X2	NA
ENSMUSG00000002379	OMA22075	No	No	No	No	NA	No	Act:-1.08	NA	NA	NA	Ndufa11 NADH dehydrogenase (ubiquinone) 1 alpha subcomplex 11	NADH dehydrogenase	NADH dehydrogenase	NA
ENSMUSG00000002393	OMA06204	No	No	Yes	No	NA	NA	NA	NA	NA	NA	Nr2f6 nuclear receptor subfamily 2, group F, member 6	nuclear receptor subfamily 2 group F member 6	NA	NA
ENSMUSG00000002428	OMA02740	No	No	No	No	NA	No	Rep:0.55	Yes	No	No	Hltf helicase-like transcription factor	PREDICTED: helicase-like transcription factor isoform X1	helicase-like transcription factor isoform X1	Helicase-like transcription factor;
ENSMUSG00000002455	OMA00586	No	No	No	No	No	No	No	Yes	No	Yes	Prpf6 pre-mRNA splicing factor 6	pre-mRNA-processing factor 6	pre-mRNA-processing factor 6	pre-mRNA splicing factor, putative [Ixodes scapularis]
ENSMUSG00000002458	OMA15096	No	No	No	No	Yes	NA	NA	NA	NA	NA	Rgs19 regulator of G-protein signaling 19	regulator of G-protein signaling 19	NA	NA
ENSMUSG00000002459	OMA12795	Yes	No	No	No	Yes	No	Rep:2.20	No	No	NA	Rgs20 regulator of G-protein signaling 20	regulator of G-protein signaling 20	regulator of G-protein signaling 20 isoform X2	AGAP007127-PA-like protein [Anopheles sinensis]
ENSMUSG00000002475	OMA06931	No	Act:-6.74	No	No	No	No	No	No	No	No	Abhd3 abhydrolase domain containing 3	phospholipase ABHD3	phospholipase ABHD3	PREDICTED: abhydrolase domain-containing protein 1 [Heterocephalus glaber]
ENSMUSG00000002477	OMA14723	No	No	No	No	No	No	No	No	No	Yes	Snrpd1 small nuclear ribonucleoprotein D1	small nuclear ribonucleoprotein Sm D1	small nuclear ribonucleoprotein Sm D1	small nuclear ribonucleoprotein Sm D1 [Xenopus (Silurana) tropicalis]
ENSMUSG00000002486	OMA09542	No	No	No	No	NA	No	Rep:0.81	No	No	NA	Tchp trichoplein, keratin filament binding	PREDICTED: trichoplein keratin filament-binding protein isoform X1	trichoplein keratin filament-binding protein	UPF0636 protein C4orf41-like protein [Crassostrea gigas]
ENSMUSG00000002489	OMA00455	No	No	Yes	No	NA	No	No	No	No	NA	Tiam1 T cell lymphoma invasion and metastasis 1	PREDICTED: T-lymphoma invasion and metastasis-inducing protein 1 isoform X1	protein still life, isoforms C/SIF type 2 isoform X1	T-lymphoma invasion and metastasis-inducing protein 1-like isoform X1 [Pocillopora damicornis]
ENSMUSG00000002524	OMA02772	No	No	No	No	No	No	No	No	Rep:1.33	No	Puf60 poly-U binding splicing factor 60	poly(U)-binding-splicing factor PUF60	poly(U)-binding-splicing factor PUF60 isoform X1	poly(U)-binding-splicing factor PUF60-B [Danio rerio]
ENSMUSG00000002578	OMA04800	No	No	No	No	Yes	NA	NA	NA	NA	NA	Ikzf4 IKAROS family zinc finger 4	PREDICTED: LOW QUALITY PROTEIN: zinc finger protein Eos	NA	NA
ENSMUSG00000002617	OMA10307	Yes	No	No	No	NA	No	No	NA	NA	NA	Zfp40 zinc finger protein 40	PREDICTED: oocyte zinc finger protein XlCOF7.1-like	zinc finger protein 271 isoform X3	NA
ENSMUSG00000002633	NA	No	Act:-3.31	NA	NA	NA	NA	NA	NA	NA	NA	Shh sonic hedgehog	NA	NA	NA
ENSMUSG00000002668	OMA09256	No	No	No	No	Yes	NA	NA	NA	NA	NA	Dennd1c DENN/MADD domain containing 1C	PREDICTED: DENN domain-containing protein 1C	NA	NA
ENSMUSG00000002688	OMA01453	Yes	No	No	No	No	No	Rep:0.63	No	No	No	Prkd1 protein kinase D1	serine/threonine-protein kinase D1	serine/threonine-protein kinase D3 isoform X4	PREDICTED: serine/threonine-protein kinase D3 isoform X1 [Heterocephalus glaber]
ENSMUSG00000002699	OMA14692	No	No	No	No	Yes	NA	NA	NA	NA	NA	Lcp2 lymphocyte cytosolic protein 2	lymphocyte cytosolic protein 2	NA	NA
ENSMUSG00000002741	OMA11356	No	No	No	No	NA	No	No	Yes	No	No	Ykt6 YKT6 v-SNARE homolog (S. cerevisiae)	synaptobrevin homolog YKT6	synaptobrevin homolog YKT6-like	Synaptobrevin-like protein YKT6 [Zootermopsis nevadensis]
ENSMUSG00000002769	OMA13907	No	No	NA	NA	NA	No	No	Yes	No	NA	Gnmt glycine N-methyltransferase	NA	glycine N-methyltransferase	Glycine N-methyltransferase [Harpegnathos saltator]
ENSMUSG00000002799	OMA01361	No	No	No	No	NA	NA	NA	Yes	No	NA	Jag2 jagged 2	PREDICTED: LOW QUALITY PROTEIN: protein jagged-2	NA	protein jagged-1-like [Exaiptasia pallida]
ENSMUSG00000002814	OMA01657	No	No	No	No	No	No	Rep:0.54	No	No	Yes	Top3a topoisomerase (DNA) III alpha	PREDICTED: DNA topoisomerase 3-alpha	DNA topoisomerase 3-alpha	DNA topoisomerase 3-alpha isoform 1 [Gallus gallus]
ENSMUSG00000002820	OMA10872	No	No	No	No	No	No	Rep:0.55	NA	NA	NA	Atg4d autophagy related 4D, cysteine peptidase	cysteine protease ATG4D	uncharacterized protein LOC581768 isoform X2	NA
ENSMUSG00000002825	OMA07351	No	No	No	No	NA	No	No	No	Act:-1.19	No	Qtrt1 queuine tRNA-ribosyltransferase catalytic subunit 1	queuine tRNA-ribosyltransferase catalytic subunit 1	queuine tRNA-ribosyltransferase catalytic subunit 1-like	queuine tRNA-ribosyltransferase [Danio rerio]
ENSMUSG00000002831	OMA26259	No	No	NA	NA	NA	NA	NA	No	Rep:1.65	NA	Plin4 perilipin 4	NA	NA	NA
ENSMUSG00000002870	OMA01086	No	No	No	No	No	No	Act:-0.89	No	No	No	Mcm2 minichromosome maintenance complex component 2	DNA replication licensing factor mcm2	LOW QUALITY PROTEIN: DNA replication licensing factor mcm2	minichromosome maintenance 2 [Patiria pectinifera]
ENSMUSG00000002900	OMA00388	No	No	Yes	No	No	Yes	Act:-0.36	NA	NA	NA	Lamb1 laminin B1	PREDICTED: laminin subunit beta-1	laminin subunit beta-1	NA
ENSMUSG00000002944	OMA09804	Yes	No	No	No	No	No	No	No	No	NA	Cd36 CD36 antigen	platelet glycoprotein 4	lysosome membrane protein 2	mLGP85/LIMP II [Callorhinchus milii]
ENSMUSG00000002963	OMA09339	No	No	Yes	No	No	No	No	NA	NA	No	Pnkp polynucleotide kinase 3'- phosphatase	bifunctional polynucleotide phosphatase/kinase	bifunctional polynucleotide phosphatase/kinase isoform X1	NA
ENSMUSG00000002981	OMA02838	No	No	No	No	No	No	Rep:0.86	No	No	NA	Clptm1 cleft lip and palate associated transmembrane protein 1	PREDICTED: cleft lip and palate transmembrane protein 1 isoform X1	cleft lip and palate transmembrane protein 1 homolog	cleft lip and palate transmembrane protein 1 homolog [Danio rerio]
ENSMUSG00000003033	OMA03098	No	No	No	No	No	No	Act:-0.69	No	No	No	Ap1m1 adaptor-related protein complex AP-1, mu subunit 1	AP-1 complex subunit mu-1	AP-1 complex subunit mu-1 isoform X2	clathrin coat assembly protein ap-1, putative [Pediculus humanus corporis]
ENSMUSG00000003038	OMA25472	Yes	No	No	No	NA	NA	NA	NA	NA	NA	Hmgn2 high mobility group nucleosomal binding domain 2	non-histone chromosomal protein HMG-14	NA	NA
ENSMUSG00000003053	OMA10310	No	No	No	No	No	No	No	No	Act:-1.07	NA	Cyp2c29 cytochrome P450, family 2, subfamily c, polypeptide 29	uncharacterized protein LOC100145695	cytochrome P450 2C15	RecName: Full=Steroid 17-alpha-hydroxylase/17,20 lyase; AltName: Full=17-alpha-hydroxyprogesterone aldolase; AltName: Full=CYPXVII; AltName: Full=Cytochrome P450 17A1; AltName: Full=Cytochrome P450-C17; Short=Cytochrome P450c17
ENSMUSG00000003062	OMA13773	No	No	No	No	No	No	No	No	No	Yes	Stard3nl STARD3 N-terminal like	MLN64 N-terminal domain homolog	stAR-related lipid transfer protein 3 isoform X1	PREDICTED: stAR-related lipid transfer protein 3 [Tribolium castaneum]
ENSMUSG00000003068	OMA05446	Yes	No	No	No	No	No	Rep:1.09	NA	NA	No	Stk11 serine/threonine kinase 11	serine/threonine-protein kinase STK11	serine/threonine-protein kinase stk11	NA
ENSMUSG00000003072	OMA17127	No	No	No	No	No	No	Act:-0.87	No	No	No	Atp5d ATP synthase, H+ transporting, mitochondrial F1 complex, delta subunit	ATP synthase subunit delta, mitochondrial	ATP synthase subunit delta, mitochondrial	ATP synthase subunit delta, mitochondrial precursor [Salmo salar]
ENSMUSG00000003123	OMA05192	No	No	No	No	No	No	No	Yes	No	No	Lipe lipase, hormone sensitive	hormone-sensitive lipase	hormone-sensitive lipase isoform X1	Hormone-sensitive lipase [Crassostrea gigas]
ENSMUSG00000003134	OMA00995	Yes	No	No	No	NA	NA	NA	NA	NA	NA	Tbc1d8 TBC1 domain family, member 8	PREDICTED: TBC1 domain family member 8 isoform X1	NA	NA
ENSMUSG00000003135	OMA03886	No	No	No	No	No	No	No	Yes	No	No	Cnot11 CCR4-NOT transcription complex, subunit 11	PREDICTED: CCR4-NOT transcription complex subunit 11 isoform X1	CCR4-NOT transcription complex subunit 11	C2orf29 homolog
ENSMUSG00000003153	OMA06647	No	No	No	Rep:1.79	No	No	No	No	No	NA	Slc2a3 solute carrier family 2 (facilitated glucose transporter), member 3	PREDICTED: solute carrier family 2, facilitated glucose transporter member 14	solute carrier family 2, facilitated glucose transporter member 1	Solute carrier family 2, facilitated glucose transporter member 3 [Pteropus alecto]
ENSMUSG00000003166	OMA04211	No	No	No	No	NA	No	Rep:0.72	No	No	NA	Dgcr2 DiGeorge syndrome critical region gene 2	integral membrane protein DGCR2/IDD precursor	integral membrane protein DGCR2/IDD isoform X2	Integral membrane protein DGCR2/IDD;
ENSMUSG00000003208	OMA10999	No	No	No	No	No	No	No	No	No	Yes	Ccdc94 coiled-coil domain containing 94	coiled-coil domain-containing protein 94	splicing factor YJU2	coiled-coil domain-containing protein 94 [Homo sapiens]
ENSMUSG00000003228	OMA02742	No	No	No	No	No	No	No	Yes	No	Yes	Grk5 G protein-coupled receptor kinase 5	PREDICTED: G protein-coupled receptor kinase 5 isoform X1	G protein-coupled receptor kinase 5	G protein-coupled receptor kinase 4 [Xenopus laevis]
ENSMUSG00000003233	OMA01874	No	No	Yes	No	Yes	NA	NA	NA	NA	NA	Dvl3 dishevelled segment polarity protein 3	segment polarity protein dishevelled homolog DVL-3	NA	NA
ENSMUSG00000003235	OMA03779	Yes	No	Yes	No	No	No	No	No	No	No	Eif2b5 eukaryotic translation initiation factor 2B, subunit 5 epsilon	PREDICTED: translation initiation factor eIF-2B subunit epsilon isoform X1	translation initiation factor eIF-2B subunit epsilon	Translation initiation factor eIF-2B subunit epsilon [Chelonia mydas]
ENSMUSG00000003271	OMA14916	No	No	No	No	Yes	No	Act:-1.90	NA	NA	NA	Sult2b1 sulfotransferase family, cytosolic, 2B, member 1	bile salt sulfotransferase	sulfotransferase 1C4	NA
ENSMUSG00000003279	OMA01167	Yes	No	No	Rep:1.08	NA	NA	NA	NA	NA	NA	Dlgap1 discs, large (Drosophila) homolog-associated protein 1	disks large-associated protein 1	NA	NA
ENSMUSG00000003308	OMA03380	No	No	No	No	No	No	Rep:0.73	NA	NA	NA	Keap1 kelch-like ECH-associated protein 1	kelch-like ECH-associated protein 1	kelch-like ECH-associated protein 1	NA
ENSMUSG00000003309	OMA04231	Yes	No	No	No	NA	NA	NA	NA	NA	NA	Ap1m2 adaptor protein complex AP-1, mu 2 subunit	AP-1 complex subunit mu-2	NA	NA
ENSMUSG00000003344	OMA03515	No	No	No	No	No	No	No	Yes	No	NA	Btbd2 BTB (POZ) domain containing 2	PREDICTED: BTB/POZ domain-containing protein 2 isoform X1	BTB/POZ domain-containing protein 2	BTB (POZ) domain containing 2 [Xenopus laevis]
ENSMUSG00000003348	OMA09632	No	No	No	No	No	No	Rep:0.48	NA	NA	NA	Mob3a MOB kinase activator 3A	MOB kinase activator 3A	MOB kinase activator 3B	NA
ENSMUSG00000003360	OMA01099	No	No	No	No	NA	No	No	Yes	No	No	Ddx23 DEAD (Asp-Glu-Ala-Asp) box polypeptide 23	probable ATP-dependent RNA helicase DDX23	probable ATP-dependent RNA helicase DDX23 isoform X2	probable ATP-dependent RNA helicase DDX23 [Exaiptasia pallida]
ENSMUSG00000003379	OMA22202	No	No	Yes	No	NA	NA	NA	NA	NA	NA	Cd79a CD79A antigen (immunoglobulin-associated alpha)	PREDICTED: B-cell antigen receptor complex-associated protein alpha chain	NA	NA
ENSMUSG00000003402	OMA07182	No	No	No	No	NA	NA	NA	Yes	No	No	Prkcsh protein kinase C substrate 80K-H	glucosidase 2 subunit beta precursor	NA	protein kinase C substrate 80K-H precursor [Xenopus laevis]
ENSMUSG00000003410	OMA05789	No	No	Yes	No	No	No	Rep:0.63	NA	NA	NA	Elavl3 ELAV (embryonic lethal, abnormal vision, Drosophila)-like 3 (Hu antigen C)	ELAV-like protein 3	ELAV-like protein 3 isoform X4	NA
ENSMUSG00000003411	OMA11756	Yes	No	No	No	NA	NA	NA	NA	NA	NA	Rab3b RAB3B, member RAS oncogene family	ras-related protein Rab-3B	NA	NA
ENSMUSG00000003418	OMA11913	No	Act:-3.94	Yes	No	NA	No	No	NA	NA	NA	St8sia6 ST8 alpha-N-acetyl-neuraminide alpha-2,8-sialyltransferase 6	alpha-2,8-sialyltransferase 8F	CMP-N-acetylneuraminate-poly-alpha-2,8-sialyltransferase-like	NA
ENSMUSG00000003429	OMA11803	No	No	Yes	No	No	No	Act:-1.22	No	No	No	Rps11 ribosomal protein S11	40S ribosomal protein S11	40S ribosomal protein S11	S11 [Suberites domuncula]
ENSMUSG00000003435	OMA00564	Yes	No	No	No	No	No	No	No	No	NA	Supt5 suppressor of Ty 5	transcription elongation factor SPT5	transcription elongation factor SPT5	PREDICTED: transcription elongation factor SPT5 isoform X1 [Bos mutus]
ENSMUSG00000003436	OMA19929	Yes	Act:-1.20	NA	NA	NA	No	Act:-1.13	No	No	NA	Dll3 delta-like 3 (Drosophila)	NA	latent-transforming growth factor beta-binding protein 2-like isoform X5	Zonadhesin [Crassostrea gigas]
ENSMUSG00000003438	OMA09486	No	No	Yes	No	NA	No	No	NA	NA	No	Timm50 translocase of inner mitochondrial membrane 50	mitochondrial import inner membrane translocase subunit TIM50	mitochondrial import inner membrane translocase subunit TIM50	NA
ENSMUSG00000003452	OMA02202	No	No	Yes	No	NA	No	No	NA	NA	NA	Bicd1 bicaudal D homolog 1 (Drosophila)	PREDICTED: protein bicaudal D homolog 1	protein bicaudal D homolog 2 isoform X1	NA
ENSMUSG00000003464	OMA15118	No	No	No	No	No	No	Act:-0.73	No	No	No	Pex19 peroxisomal biogenesis factor 19	peroxisomal biogenesis factor 19	peroxisomal biogenesis factor 19-like	Peroxisomal biogenesis factor 19 [Crassostrea gigas]
ENSMUSG00000003476	OMA20417	No	Act:-7.79	NA	NA	NA	No	No	NA	NA	NA	Crhr2 corticotropin releasing hormone receptor 2	NA	corticotropin-releasing factor receptor 1	NA
ENSMUSG00000003484	OMA07418	No	No	No	No	Yes	NA	NA	NA	NA	NA	Cyp4f18 cytochrome P450, family 4, subfamily f, polypeptide 18	cytochrome P450 family 4 subfamily F member 22	NA	NA
ENSMUSG00000003500	OMA02864	No	No	Yes	No	No	No	Act:-0.72	NA	NA	NA	Impdh1 inosine monophosphate dehydrogenase 1	inosine-5'-monophosphate dehydrogenase 1	inosine-5'-monophosphate dehydrogenase 1a-like isoform X3	NA
ENSMUSG00000003505	OMA27429	Yes	No	No	No	NA	NA	NA	NA	NA	NA	Psg18 pregnancy specific glycoprotein 18	PREDICTED: carcinoembryonic antigen-related cell adhesion molecule 3-like isoform X1	NA	NA
ENSMUSG00000003526	OMA04866	No	No	No	No	No	No	No	No	No	Yes	Prodh proline dehydrogenase	PREDICTED: proline dehydrogenase 1, mitochondrial-like	proline dehydrogenase 1, mitochondrial	proline dehydrogenase (oxidase) 1 [Xenopus laevis]
ENSMUSG00000003528	OMA07426	No	No	No	No	No	No	Act:-0.86	No	No	No	Slc25a1 solute carrier family 25 (mitochondrial carrier, citrate transporter), member 1	tricarboxylate transport protein, mitochondrial	tricarboxylate transport protein, mitochondrial	mitochondrial tricarboxylate transport protein [Ictalurus punctatus]
ENSMUSG00000003531	OMA15806	Yes	No	Yes	No	No	No	Rep:0.85	NA	NA	NA	Dgcr6 DiGeorge syndrome critical region gene 6	PREDICTED: protein DGCR6L	protein DGCR6	NA
ENSMUSG00000003534	OMA03408	No	Rep:1.32	No	No	NA	NA	NA	NA	NA	NA	Ddr1 discoidin domain receptor family, member 1	PREDICTED: epithelial discoidin domain-containing receptor 1 isoform X1	NA	NA
ENSMUSG00000003545	OMA15312	No	No	No	Rep:2.24	NA	NA	NA	No	No	NA	Fosb FBJ osteosarcoma oncogene B	PREDICTED: protein fosB	NA	cyclic AMP-dependent transcription factor ATF-3-like isoform X2 [Orbicella faveolata]
ENSMUSG00000003555	OMA11343	No	Act:-8.10	No	No	No	No	No	No	Rep:2.51	NA	Cyp17a1 cytochrome P450, family 17, subfamily a, polypeptide 1	cytochrome P450 family 17 subfamily A member 1 precursor	steroid 17-alpha-hydroxylase/17,20 lyase	steroid 17-alpha-hydroxylase/17,20 lyase precursor [Oryzias latipes]
ENSMUSG00000003617	OMA03061	Yes	No	No	No	NA	No	No	NA	NA	NA	Cp ceruloplasmin	PREDICTED: ceruloplasmin	LOW QUALITY PROTEIN: hephaestin-like protein	NA
ENSMUSG00000003657	OMA09875	No	No	No	No	NA	No	No	Yes	No	NA	Calb2 calbindin 2	PREDICTED: LOW QUALITY PROTEIN: calretinin	calbindin-32 isoform X5	Calretinin [Salmo salar]
ENSMUSG00000003660	OMA00083	No	No	No	No	No	No	Rep:0.83	No	No	No	Snrnp200 small nuclear ribonucleoprotein 200 (U5)	PREDICTED: U5 small nuclear ribonucleoprotein 200 kDa helicase	U5 small nuclear ribonucleoprotein 200 kDa helicase isoform X2	U5 small nuclear ribonucleoprotein 200 kDa helicase [Bos taurus]
ENSMUSG00000003662	OMA07097	No	No	No	No	Yes	No	No	NA	NA	No	Ciao1 cytosolic iron-sulfur protein assembly 1	probable cytosolic iron-sulfur protein assembly protein ciao1	probable cytosolic iron-sulfur protein assembly protein CIAO1 homolog	NA
ENSMUSG00000003680	OMA07241	No	No	No	No	No	No	Rep:0.77	No	No	NA	Taf6l TATA-box binding protein associated factor 6 like	PREDICTED: TAF6-like RNA polymerase II p300/CBP-associated factor-associated factor 65 kDa subunit 6L isoform X1	TAF6-like RNA polymerase II p300/CBP-associated factor-associated factor 65 kDa subunit 6L	TAF6-like RNA polymerase II p300/CBP-associated factor-associated factor 65 kDa subunit 6L;
ENSMUSG00000003752	OMA10378	No	No	No	No	Yes	NA	NA	NA	NA	NA	Itpkc inositol 1,4,5-trisphosphate 3-kinase C	inositol-trisphosphate 3-kinase C	NA	NA
ENSMUSG00000003812	OMA16534	Yes	No	No	No	NA	No	No	NA	NA	NA	Dnase2a deoxyribonuclease II alpha	deoxyribonuclease-2-alpha precursor	deoxyribonuclease-2-alpha isoform X3	NA
ENSMUSG00000003814	OMA05893	No	No	No	No	No	No	Act:-1.23	No	No	No	Calr calreticulin	calreticulin precursor	calreticulin-like	calreticulin [Crassostrea gigas]
ENSMUSG00000003824	OMA22400	No	No	No	Rep:1.85	NA	No	No	No	No	NA	Syce2 synaptonemal complex central element protein 2	PREDICTED: synaptonemal complex central element protein 2, partial	synaptonemal complex central element protein 2-like	Tenascin-X [Crassostrea gigas]
ENSMUSG00000003868	OMA03188	No	No	No	No	No	No	No	NA	NA	Yes	Ruvbl2 RuvB-like protein 2	ruvB-like 2	ruvB-like 2 isoform X1	NA
ENSMUSG00000003923	OMA19200	Yes	No	No	No	NA	NA	NA	NA	NA	NA	Tfam transcription factor A, mitochondrial	PREDICTED: transcription factor A, mitochondrial	NA	NA
ENSMUSG00000003934	OMA14024	Yes	No	No	No	NA	NA	NA	No	No	NA	Efnb3 ephrin B3	ephrin-B3 precursor	NA	ephrin precursor [Ciona intestinalis]
ENSMUSG00000003948	OMA08937	Yes	No	No	No	No	No	No	No	No	No	Mmd monocyte to macrophage differentiation-associated	PREDICTED: monocyte to macrophage differentiation factor isoform X1	monocyte to macrophage differentiation factor 2 isoform X1	GK19878 [Drosophila willistoni]
ENSMUSG00000003970	OMA07065	No	No	No	No	No	No	Act:-1.49	No	No	Yes	Rpl8 ribosomal protein L8	60S ribosomal protein L8	60S ribosomal protein L8	ribosomal protein rpl8 [Eurythoe complanata]
ENSMUSG00000003974	OMA01687	Yes	No	No	No	NA	NA	NA	NA	NA	NA	Grm3 glutamate receptor, metabotropic 3	PREDICTED: metabotropic glutamate receptor 3	NA	NA
ENSMUSG00000003992	OMA04578	Yes	Rep:1.23	No	No	No	No	No	NA	NA	NA	Ssbp2 single-stranded DNA binding protein 2	single-stranded DNA-binding protein 2	single-stranded DNA-binding protein 2 isoform X3	NA
ENSMUSG00000004043	OMA01607	No	No	No	No	Yes	No	No	NA	NA	NA	Stat5a signal transducer and activator of transcription 5A	PREDICTED: signal transducer and activator of transcription 5B isoform X1	signal transducer and activator of transcription 5B isoform X3	NA
ENSMUSG00000004056	OMA03591	No	No	No	No	No	No	Act:-1.37	NA	NA	NA	Akt2 thymoma viral proto-oncogene 2	RAC-beta serine/threonine-protein kinase	RAC-gamma serine/threonine-protein kinase	NA
ENSMUSG00000004085	OMA04505	No	No	No	No	Yes	NA	NA	NA	NA	No	Map3k20 mitogen-activated protein kinase kinase kinase 20	PREDICTED: mitogen-activated protein kinase kinase kinase MLT isoform X1	NA	NA
ENSMUSG00000004098	OMA14942	No	No	NA	NA	NA	NA	NA	No	Rep:2.29	NA	Col5a3 collagen, type V, alpha 3	NA	NA	collagen triple helix repeat (fragment), tail fiber protein from prophage, partial [Ralstonia solanacearum]
ENSMUSG00000004099	OMA00749	No	No	No	No	No	No	Act:-0.59	No	No	NA	Dnmt1 DNA methyltransferase (cytosine-5) 1	PREDICTED: DNA (cytosine-5)-methyltransferase 1	DNA (cytosine-5)-methyltransferase PliMCI	DNA (cytosine-5)-methyltransferase 1 [Monodelphis domestica]
ENSMUSG00000004110	OMA00184	Yes	No	No	No	Yes	No	Act:-0.86	No	No	NA	Cacna1e calcium channel, voltage-dependent, R type, alpha 1E subunit	PREDICTED: voltage-dependent R-type calcium channel subunit alpha-1E isoform X1	voltage-dependent calcium channel type A subunit alpha-1 isoform X1	voltage dependent L type calcium channel subunit [Echinococcus granulosus]
ENSMUSG00000004113	OMA01226	No	No	NA	NA	Yes	No	Act:-0.86	NA	NA	NA	Cacna1b calcium channel, voltage-dependent, N type, alpha 1B subunit	NA	voltage-dependent calcium channel type A subunit alpha-1 isoform X1	NA
ENSMUSG00000004151	OMA03511	No	No	No	No	NA	No	No	NA	NA	NA	Etv1 ets variant 1	ETS translocation variant 1	ETS translocation variant 1 isoform X2	NA
ENSMUSG00000004207	OMA14204	No	No	No	No	No	No	No	No	Act:-1.72	NA	Psap prosaposin	prosaposin precursor	prosaposin	prosaposin [Campylomormyrus compressirostris]
ENSMUSG00000004231	OMA12623	No	Rep:1.79	Yes	No	NA	No	No	NA	NA	NA	Pax2 paired box 2	paired box protein Pax-2	paired box protein Pax-2a isoform X3	NA
ENSMUSG00000004296	OMA28323	No	No	No	Rep:2.35	NA	NA	NA	NA	NA	NA	Il12b interleukin 12b	PREDICTED: interleukin-12 subunit beta-like	NA	NA
ENSMUSG00000004317	OMA01664	No	No	No	No	NA	No	Rep:0.70	NA	NA	NA	Clcn5 chloride channel, voltage-sensitive 5	H(+)/Cl(-) exchange transporter 5	H(+)/Cl(-) exchange transporter 3 isoform X1	NA
ENSMUSG00000004319	OMA00950	No	No	Yes	No	No	No	Rep:0.70	No	Rep:1.10	No	Clcn3 chloride channel, voltage-sensitive 3	H(+)/Cl(-) exchange transporter 3	H(+)/Cl(-) exchange transporter 3 isoform X1	H(+)/Cl(-) exchange transporter 3 [Nestor notabilis]
ENSMUSG00000004347	OMA03747	No	Act:-1.56	No	No	NA	NA	NA	NA	NA	NA	Pde1c phosphodiesterase 1C	PREDICTED: calcium/calmodulin-dependent 3',5'-cyclic nucleotide phosphodiesterase 1C isoform X1	NA	NA
ENSMUSG00000004356	OMA00239	No	No	No	No	No	No	No	No	Rep:1.14	No	Utp20 UTP20 small subunit processome component	PREDICTED: small subunit processome component 20 homolog	LOW QUALITY PROTEIN: small subunit processome component 20 homolog	PREDICTED: small subunit processome component 20 homolog [Pteropus alecto]
ENSMUSG00000004359	OMA19826	No	No	No	No	Yes	NA	NA	NA	NA	NA	Spic Spi-C transcription factor (Spi-1/PU.1 related)	PREDICTED: transcription factor Spi-C	NA	NA
ENSMUSG00000004364	OMA00827	No	No	No	No	No	No	Rep:0.46	No	No	Yes	Cul3 cullin 3	cullin-3	cullin-3-B	PREDICTED: cullin-3 isoform X1 [Microtus ochrogaster]
ENSMUSG00000004371	OMA24275	No	No	No	Rep:4.10	NA	NA	NA	NA	NA	NA	Il11 interleukin 11	PREDICTED: interleukin-11	NA	NA
ENSMUSG00000004383	OMA02255	No	No	No	No	NA	No	No	Yes	No	No	Large1 LARGE xylosyl- and glucuronyltransferase 1	PREDICTED: glycosyltransferase-like protein LARGE1, partial	LARGE xylosyl- and glucuronyltransferase 1-like	Glycosyltransferase-like LARGE1 [Nipponia nippon]
ENSMUSG00000004508	OMA04008	No	No	Yes	No	NA	NA	NA	NA	NA	NA	Gab2 growth factor receptor bound protein 2-associated protein 2	PREDICTED: GRB2-associated-binding protein 2 isoform X1	NA	NA
ENSMUSG00000004535	OMA03997	No	No	No	No	No	No	Act:-0.43	NA	NA	NA	Tax1bp1 Tax1 (human T cell leukemia virus type I) binding protein 1	tax1-binding protein 1 homolog	tax1-binding protein 1 homolog B	NA
ENSMUSG00000004562	OMA10179	No	No	Yes	No	NA	NA	NA	NA	NA	NA	Arhgef40 Rho guanine nucleotide exchange factor (GEF) 40	PREDICTED: rho guanine nucleotide exchange factor 40 isoform X1	NA	NA
ENSMUSG00000004568	OMA04759	No	No	No	No	NA	No	Rep:0.94	NA	NA	NA	Arhgef18 rho/rac guanine nucleotide exchange factor (GEF) 18	PREDICTED: rho guanine nucleotide exchange factor 18	uncharacterized protein LOC574669 isoform X7	NA
ENSMUSG00000004609	OMA25320	No	Act:-8.15	No	No	NA	NA	NA	NA	NA	NA	Cd33 CD33 antigen	PREDICTED: sialic acid-binding Ig-like lectin 12, partial	NA	NA
ENSMUSG00000004610	OMA10582	No	No	No	No	No	No	No	No	No	Yes	Etfb electron transferring flavoprotein, beta polypeptide	electron transfer flavoprotein subunit beta	electron transfer flavoprotein subunit beta	Electron transfer flavoprotein subunit beta [Crassostrea gigas]
ENSMUSG00000004642	OMA15324	No	No	Yes	No	NA	No	No	No	No	NA	Slbp stem-loop binding protein	histone RNA hairpin-binding protein	stem-loop binding protein	histone RNA hairpin-binding protein [Xenopus laevis]
ENSMUSG00000004651	OMA05580	Yes	No	No	No	NA	NA	NA	NA	NA	NA	Tyr tyrosinase	tyrosinase precursor	NA	NA
ENSMUSG00000004655	OMA10975	No	No	No	Act:-2.05	Yes	No	Act:-0.56	NA	NA	NA	Aqp1 aquaporin 1	aquaporin-1	lens fiber major intrinsic protein-like isoform X1	NA
ENSMUSG00000004665	OMA08482	No	No	Yes	No	Yes	No	No	No	No	NA	Cnn2 calponin 2	calponin-2	myophilin-like	Muscle-specific protein 20 [Crassostrea gigas]
ENSMUSG00000004668	NA	No	Act:-6.74	NA	NA	NA	NA	NA	NA	NA	NA	Abca13 ATP-binding cassette, sub-family A (ABC1), member 13	NA	NA	NA
ENSMUSG00000004698	OMA03844	Yes	No	No	No	NA	NA	NA	NA	NA	NA	Hdac9 histone deacetylase 9	PREDICTED: histone deacetylase 5 isoform X1	NA	NA
ENSMUSG00000004730	OMA13147	No	No	No	Rep:1.48	NA	NA	NA	NA	NA	NA	Adgre1 adhesion G protein-coupled receptor E1	PREDICTED: adhesion G protein-coupled receptor E1-like isoform X1	NA	NA
ENSMUSG00000004771	OMA08545	No	No	No	No	No	NA	NA	No	No	Yes	Rab11a RAB11A, member RAS oncogene family	ras-related protein Rab-11A	NA	Rab11 protein [Aiptasia pulchella]
ENSMUSG00000004815	OMA02501	No	No	No	No	Yes	NA	NA	NA	NA	NA	Dgkq diacylglycerol kinase, theta	PREDICTED: diacylglycerol kinase theta	NA	NA
ENSMUSG00000004842	OMA08999	No	Act:-7.69	No	Act:-2.27	NA	NA	NA	No	No	NA	Pou1f1 POU domain, class 1, transcription factor 1	PREDICTED: pituitary-specific positive transcription factor 1	NA	Pou1
ENSMUSG00000004846	OMA03128	No	No	No	No	Yes	No	No	NA	NA	NA	Plod3 procollagen-lysine, 2-oxoglutarate 5-dioxygenase 3	procollagen-lysine,2-oxoglutarate 5-dioxygenase 3 precursor	procollagen-lysine,2-oxoglutarate 5-dioxygenase 2-like	NA
ENSMUSG00000004872	OMA03179	Yes	Rep:1.51	Yes	No	Yes	NA	NA	NA	NA	NA	Pax3 paired box 3	paired box protein Pax-3	NA	NA
ENSMUSG00000004885	OMA15645	No	Rep:1.16	Yes	No	NA	No	No	NA	NA	NA	Crabp2 cellular retinoic acid binding protein II	cellular retinoic acid-binding protein 2	sodium/calcium exchanger regulatory protein 1	NA
ENSMUSG00000004891	NA	Yes	No	NA	NA	NA	NA	NA	NA	NA	NA	Nes nestin	NA	NA	NA
ENSMUSG00000004895	OMA10837	Yes	No	No	No	NA	No	Rep:0.74	No	No	NA	Prcc papillary renal cell carcinoma (translocation-associated)	proline-rich protein PRCC	proline-rich protein PRCC	Proline-rich protein PRCC;
ENSMUSG00000004929	OMA03210	No	No	No	No	No	No	No	No	Rep:1.50	No	Thop1 thimet oligopeptidase 1	thimet oligopeptidase	thimet oligopeptidase isoform X2	PREDICTED: thimet oligopeptidase [Myotis davidii]
ENSMUSG00000004947	OMA08363	No	No	Yes	No	NA	No	No	NA	NA	NA	Dtx2 deltex 2, E3 ubiquitin ligase	probable E3 ubiquitin-protein ligase DTX2	E3 ubiquitin-protein ligase DTX1 isoform X1	NA
ENSMUSG00000004951	OMA17387	No	No	No	Act:-1.64	NA	NA	NA	NA	NA	NA	Hspb1 heat shock protein 1	heat shock protein beta-1	NA	NA
ENSMUSG00000004994	OMA10116	No	No	No	No	No	No	No	Yes	No	No	Ccdc130 coiled-coil domain containing 130	coiled-coil domain-containing protein 130	coiled-coil domain-containing protein 130	coiled-coil domain containing 130 [Xenopus (Silurana) tropicalis]
ENSMUSG00000005045	OMA00179	No	No	No	No	Yes	No	Rep:1.28	NA	NA	NA	Chd5 chromodomain helicase DNA binding protein 5	PREDICTED: chromodomain-helicase-DNA-binding protein 5	chromodomain-helicase-DNA-binding protein Mi-2 homolog isoform X5	NA
ENSMUSG00000005054	OMA25171	No	No	No	No	NA	NA	NA	Yes	No	No	Cstb cystatin B	PREDICTED: cystatin-A-like	NA	Zgc:56530 [Danio rerio]
ENSMUSG00000005057	OMA06614	Yes	No	No	No	NA	No	No	NA	NA	NA	Sh2b2 SH2B adaptor protein 2	PREDICTED: SH2B adapter protein 2 isoform X1	SH2B adapter protein 2	NA
ENSMUSG00000005103	OMA03015	No	No	No	No	NA	No	Rep:0.62	No	No	No	Wdr1 WD repeat domain 1	WD repeat-containing protein 1	WD repeat-containing protein 1	WD repeat-containing protein 1 [Mus musculus]
ENSMUSG00000005107	OMA06477	Yes	No	No	No	NA	NA	NA	NA	NA	NA	Slc2a9 solute carrier family 2 (facilitated glucose transporter), member 9	PREDICTED: solute carrier family 2, facilitated glucose transporter member 9 isoform X1	NA	NA
ENSMUSG00000005124	OMA09911	No	No	No	No	Yes	NA	NA	NA	NA	NA	Wisp1 WNT1 inducible signaling pathway protein 1	PREDICTED: WNT1-inducible-signaling pathway protein 1	NA	NA
ENSMUSG00000005125	OMA07323	No	No	No	No	Yes	No	No	NA	NA	NA	Ndrg1 N-myc downstream regulated gene 1	protein NDRG1	protein NDRG3 isoform X2	NA
ENSMUSG00000005131	OMA14293	No	No	No	No	No	No	Rep:0.89	No	No	NA	4930550C14Rik RIKEN cDNA 4930550C14 gene	PREDICTED: uncharacterized protein C11orf65 homolog	uncharacterized protein C11orf65 homolog isoform X2	uncharacterized protein LOC496098 [Xenopus laevis]
ENSMUSG00000005142	OMA03221	No	No	No	No	Yes	No	No	No	No	No	Man2b1 mannosidase 2, alpha B1	lysosomal alpha-mannosidase precursor	lysosomal alpha-mannosidase isoform X2	Lysosomal alpha-mannosidase [Crassostrea gigas]
ENSMUSG00000005148++	OMA07540	Yes	No	No	No	NA	NA	NA	NA	NA	NA	Klf5 Kruppel-like factor 5	PREDICTED: Krueppel-like factor 5 isoform X1	NA	NA
ENSMUSG00000005161	OMA13610	No	No	No	No	Yes	NA	NA	NA	NA	NA	Prdx2 peroxiredoxin 2	peroxiredoxin-2	NA	NA
ENSMUSG00000005202	OMA23066	No	No	No	Act:-1.51	NA	NA	NA	NA	NA	NA	Shbg sex hormone binding globulin	PREDICTED: sex hormone-binding globulin-like	NA	NA
ENSMUSG00000005220	OMA01681	No	No	Yes	No	NA	NA	NA	NA	NA	NA	Corin corin	PREDICTED: atrial natriuretic peptide-converting enzyme	NA	NA
ENSMUSG00000005225	OMA06675	Yes	No	No	Act:-1.02	No	NA	NA	Yes	No	No	Plekha8 pleckstrin homology domain containing, family A (phosphoinositide binding specific) member 8	PREDICTED: pleckstrin homology domain-containing family A member 8 isoform X1	NA	glycolipid transfer protein [Homo sapiens]
ENSMUSG00000005237	OMA00033	Yes	No	No	No	No	No	No	No	No	NA	Dnah2 dynein, axonemal, heavy chain 2	PREDICTED: dynein heavy chain 2, axonemal	dynein heavy chain 2, axonemal	Dynein heavy chain 2, axonemal [Myotis davidii]
ENSMUSG00000005251	OMA04257	No	No	Yes	No	NA	No	No	No	No	NA	Ripk4 receptor-interacting serine-threonine kinase 4	PREDICTED: receptor-interacting serine/threonine-protein kinase 4	serine/threonine-protein phosphatase 6 regulatory ankyrin repeat subunit A-like	ankyrin 2,3/unc44 [Aedes aegypti]
ENSMUSG00000005268	OMA11699	Yes	No	No	No	NA	NA	NA	NA	NA	NA	Prlr prolactin receptor	PREDICTED: prolactin receptor	NA	NA
ENSMUSG00000005299	OMA03974	No	No	No	No	No	NA	NA	No	No	Yes	Letm1 leucine zipper-EF-hand containing transmembrane protein 1	mitochondrial proton/calcium exchanger protein precursor	NA	paramyosin, putative [Aedes aegypti]
ENSMUSG00000005312	OMA03964	Yes	No	No	No	No	No	No	No	No	No	Ubqln1 ubiquilin 1	ubiquilin-1	ubiquilin-1-like	ubiquilin-1 [Pongo abelii]
ENSMUSG00000005320	OMA03512	No	No	Yes	No	NA	NA	NA	No	No	NA	Fgfr4 fibroblast growth factor receptor 4	fibroblast growth factor receptor 4 precursor	NA	vascular endothelial growth factor receptor [Podocoryna carnea]
ENSMUSG00000005338	OMA10024	No	No	No	No	Yes	NA	NA	NA	NA	NA	Cadm3 cell adhesion molecule 3	PREDICTED: cell adhesion molecule 3 isoform X1	NA	NA
ENSMUSG00000005354	OMA17328	No	No	Yes	No	NA	No	No	No	No	Yes	Txn2 thioredoxin 2	thioredoxin, mitochondrial	probable thioredoxin-2	uncharacterized protein LOC100225362 [Taeniopygia guttata]
ENSMUSG00000005360	OMA03154	Yes	No	No	No	No	No	No	No	No	NA	Slc1a3 solute carrier family 1 (glial high affinity glutamate transporter), member 3	excitatory amino acid transporter 1	excitatory amino acid transporter 3	PREDICTED: excitatory amino acid transporter 4 isoform X1 [Myotis brandtii]
ENSMUSG00000005362	OMA06508	No	No	No	No	Yes	No	No	No	No	NA	Crbn cereblon	protein cereblon	protein cereblon	protein cereblon [Danio rerio]
ENSMUSG00000005374	OMA07687	No	No	No	No	NA	No	No	Yes	No	NA	Tbl2 transducin (beta)-like 2	transducin beta-like protein 2	transducin beta-like protein 2	Transducin beta-like protein 2 [Crassostrea gigas]
ENSMUSG00000005397	OMA01750	Yes	No	No	No	NA	NA	NA	No	No	NA	Nid1 nidogen 1	PREDICTED: nidogen-1 isoform X1	NA	putative Low-density lipoprotein receptor repeat class B [Trichinella spiralis]
ENSMUSG00000005410	OMA01713	No	No	Yes	No	No	No	Act:-1.31	No	Rep:1.01	No	Mcm5 minichromosome maintenance complex component 5	DNA replication licensing factor mcm5	DNA replication licensing factor mcm5	DNA replication licensing factor mcm5-A;
ENSMUSG00000005417	OMA01318	No	No	No	No	Yes	NA	NA	NA	NA	NA	Mprip myosin phosphatase Rho interacting protein	PREDICTED: myosin phosphatase Rho-interacting protein isoform X1	NA	NA
ENSMUSG00000005442	OMA00938	No	No	Yes	No	NA	No	Rep:0.93	NA	NA	NA	Cic capicua transcriptional repressor	PREDICTED: protein capicua homolog isoform X1	protein capicua homolog isoform X2	NA
ENSMUSG00000005469	OMA05174	No	No	Yes	No	No	No	No	No	No	NA	Prkaca protein kinase, cAMP dependent, catalytic, alpha	cAMP-dependent protein kinase catalytic subunit alpha	cAMP-dependent protein kinase catalytic subunit 1	cAMP-dependent protein kinase catalytic subunit [Schistosoma mansoni]
ENSMUSG00000005474	OMA18032	No	No	No	No	Yes	NA	NA	NA	NA	NA	Myl10 myosin, light chain 10, regulatory	myosin regulatory light chain 10	NA	NA
ENSMUSG00000005503	OMA08312	No	No	Yes	No	NA	NA	NA	NA	NA	NA	Evx1 even-skipped homeobox 1	PREDICTED: homeobox even-skipped homolog protein 1 isoform X1	NA	NA
ENSMUSG00000005506	OMA03263	No	No	Yes	No	NA	NA	NA	No	No	NA	Celf1 CUGBP, Elav-like family member 1	CUGBP Elav-like family member 1	NA	cugbp elav-like family member 4 [Ascaris suum]
ENSMUSG00000005514	OMA02626	No	No	No	No	No	No	No	Yes	No	Yes	Por P450 (cytochrome) oxidoreductase	PREDICTED: NADPH--cytochrome P450 reductase isoform X1	NADPH--cytochrome P450 reductase	NADPH--cytochrome P450 reductase [Crassostrea gigas]
ENSMUSG00000005534	OMA00782	Yes	No	No	Rep:1.72	NA	NA	NA	NA	NA	NA	Insr insulin receptor	PREDICTED: insulin receptor isoform X1	NA	NA
ENSMUSG00000005540	OMA24064	No	No	No	No	NA	No	No	No	Rep:1.42	NA	Fcer2a Fc receptor, IgE, low affinity II, alpha polypeptide	PREDICTED: asialoglycoprotein receptor 2-like	macrophage mannose receptor 1	mannose receptor, C type 2 precursor [Xenopus (Silurana) tropicalis]
ENSMUSG00000005583	OMA02948	Yes	No	Yes	No	NA	NA	NA	No	Act:-1.12	NA	Mef2c myocyte enhancer factor 2C	myocyte-specific enhancer factor 2C	NA	PREDICTED: myocyte-specific enhancer factor 2C-like isoform 7 [Dasypus novemcinctus]
ENSMUSG00000005609	OMA00555	No	No	No	No	No	No	Rep:0.57	No	No	No	Ctr9 CTR9 homolog, Paf1/RNA polymerase II complex component	RNA polymerase-associated protein CTR9 homolog	LOW QUALITY PROTEIN: RNA polymerase-associated protein CTR9 homolog	RNA polymerase-associated protein CTR9-like protein [Acromyrmex echinatior]
ENSMUSG00000005656	OMA04117	No	No	No	No	No	No	Act:-0.44	No	No	NA	Snx6 sorting nexin 6	sorting nexin-6	sorting nexin-6 isoform X3	Sorting nexin-6 [Crassostrea gigas]
ENSMUSG00000005687	OMA10398	Yes	No	No	No	No	No	No	No	No	No	Bcas2 breast carcinoma amplified sequence 2	pre-mRNA-splicing factor SPF27	pre-mRNA-splicing factor SPF27	Pre-mRNA-splicing factor SPF27 [Crassostrea gigas]
ENSMUSG00000005718	OMA07541	No	No	Yes	No	Yes	No	No	Yes	No	NA	Tfap4 transcription factor AP4	transcription factor AP-4	transcription factor AP-4	Transcription factor AP-4 [Crassostrea gigas]
ENSMUSG00000005800	OMA11065	Yes	No	No	No	NA	No	No	Yes	No	NA	Mmp8 matrix metallopeptidase 8	matrix metallopeptidase 1 precursor	matrix metalloproteinase-16	matrix metallopeptidase 19-like precursor [Saccoglossus kowalevskii]
ENSMUSG00000005803	OMA06507	Yes	No	No	No	NA	No	No	No	No	NA	Sqor sulfide quinone oxidoreductase	sulfide:quinone oxidoreductase, mitochondrial	sulfide:quinone oxidoreductase, mitochondrial-like isoform X3	PREDICTED: sulfide:quinone oxidoreductase, mitochondrial isoform X1 [Anas platyrhynchos]
ENSMUSG00000005813	OMA08914	No	No	No	No	NA	No	Act:-0.82	No	No	No	Metap1 methionyl aminopeptidase 1	methionine aminopeptidase 1	methionine aminopeptidase 1	Methionine aminopeptidase 1 [Crassostrea gigas]
ENSMUSG00000005823	OMA11102	Yes	No	No	No	NA	No	No	NA	NA	NA	Gpr108 G protein-coupled receptor 108	protein GPR107	protein GPR108-like isoform X2	NA
ENSMUSG00000005836	OMA09491	No	No	Yes	No	NA	NA	NA	NA	NA	NA	Gata6 GATA binding protein 6	transcription factor GATA-6	NA	NA
ENSMUSG00000005873++	OMA13958	Yes	No	No	No	NA	No	No	Yes	No	No	Reep5 receptor accessory protein 5	receptor expression-enhancing protein 5	receptor expression-enhancing protein 5 isoform X1	receptor accessory protein 5 [Procambarus clarkii]
ENSMUSG00000005881	OMA05479	No	No	No	No	No	No	No	No	Rep:1.09	No	Ergic3 ERGIC and golgi 3	endoplasmic reticulum-Golgi intermediate compartment protein 3	endoplasmic reticulum-Golgi intermediate compartment protein 3	endoplasmic reticulum-Golgi intermediate compartment protein 3 isoform 2 [Danio rerio]
ENSMUSG00000005882	OMA12667	Yes	No	No	No	No	No	No	No	No	NA	Uqcc1 ubiquinol-cytochrome c reductase complex assembly factor 1	ubiquinol-cytochrome c reductase complex assembly factor 1	ubiquinol-cytochrome-c reductase complex assembly factor 1	ubiquinol-cytochrome c reductase complex chaperone [Gallus gallus]
ENSMUSG00000005883	OMA13664	No	No	Yes	No	No	No	No	No	Act:-1.31	No	Spo11 SPO11 meiotic protein covalently bound to DSB	meiotic recombination protein SPO11	meiotic recombination protein SPO11-like	meiotic recombination protein SPO11 [Sus scrofa]
ENSMUSG00000005893	OMA02338	No	No	No	No	No	No	Rep:0.77	NA	NA	NA	Nr2c2 nuclear receptor subfamily 2, group C, member 2	PREDICTED: nuclear receptor subfamily 2 group C member 2 isoform X1	orphan steroid hormone receptor 2	NA
ENSMUSG00000005917	OMA07855	No	Act:-4.20	Yes	No	NA	No	Rep:0.56	NA	NA	NA	Otx1 orthodenticle homeobox 1	homeobox protein OTX1	homeobox protein OTX isoform alpha	NA
ENSMUSG00000005949	OMA10485	No	No	No	No	NA	No	Act:-1.08	No	No	No	Ctns cystinosis, nephropathic	cystinosin precursor	cystinosin	GA27047 [Drosophila pseudoobscura pseudoobscura]
ENSMUSG00000005950	OMA08327	No	No	No	Act:-1.56	NA	No	No	NA	NA	No	P2rx5 purinergic receptor P2X, ligand-gated ion channel, 5	PREDICTED: P2X purinoceptor 5	P2X purinoceptor 4	NA
ENSMUSG00000005951	OMA08342	No	No	No	No	Yes	No	No	No	No	No	Shpk sedoheptulokinase	sedoheptulokinase	sedoheptulokinase	Sedoheptulokinase [Chelonia mydas]
ENSMUSG00000005952	OMA03818	No	No	No	Rep:1.30	NA	No	No	NA	NA	NA	Trpv1 transient receptor potential cation channel, subfamily V, member 1	transient receptor potential cation channel subfamily V member 1	transient receptor potential cation channel subfamily V member 5	NA
ENSMUSG00000005958	OMA01230	Yes	No	Yes	No	NA	NA	NA	NA	NA	NA	Ephb3 Eph receptor B3	PREDICTED: ephrin type-B receptor 3	NA	NA
ENSMUSG00000005980	OMA17751	No	No	Yes	No	NA	No	No	NA	NA	NA	Dnase1 deoxyribonuclease I	PREDICTED: deoxyribonuclease-1-like isoform X1	uncharacterized protein LOC100891970 isoform X5	NA
ENSMUSG00000005982	OMA10322	Yes	No	No	No	No	Yes	No	NA	NA	NA	Naa60 N(alpha)-acetyltransferase 60, NatF catalytic subunit	N-alpha-acetyltransferase 60	uncharacterized protein LOC594473	NA
ENSMUSG00000005994	OMA05771	Yes	No	No	No	No	NA	NA	NA	NA	NA	Tyrp1 tyrosinase-related protein 1	5,6-dihydroxyindole-2-carboxylic acid oxidase precursor	NA	NA
ENSMUSG00000006010	OMA12326	No	No	No	No	No	No	Act:-0.80	No	No	No	BC003331 cDNA sequence BC003331	PREDICTED: protein odr-4 homolog isoform X1	protein odr-4 homolog	odr-4-like protein [Crassostrea gigas]
ENSMUSG00000006019	OMA01893	No	No	No	No	NA	No	Rep:0.82	No	No	No	Dhx34 DEAH (Asp-Glu-Ala-His) box polypeptide 34	probable ATP-dependent RNA helicase DHX34	probable ATP-dependent RNA helicase DHX34	DEAH (Asp-Glu-Ala-His) box polypeptide 34 [Xenopus (Silurana) tropicalis]
ENSMUSG00000006050	OMA18811	No	No	No	No	NA	No	Act:-1.04	No	No	NA	Sra1 steroid receptor RNA activator 1	steroid receptor RNA activator 1	steroid receptor RNA activator 1	Steroid receptor RNA activator 1;
ENSMUSG00000006058	OMA14296	No	No	No	No	No	No	No	No	Rep:1.03	No	Snf8 SNF8, ESCRT-II complex subunit, homolog (S. cerevisiae)	PREDICTED: vacuolar-sorting protein SNF8-like	vacuolar-sorting protein SNF8-like	vacuolar-sorting protein SNF8 [Bos taurus]
ENSMUSG00000006134	OMA10363	No	No	No	No	No	No	No	NA	NA	Yes	Crkl v-crk avian sarcoma virus CT10 oncogene homolog-like	crk-like protein	crk-like protein isoform X1	NA
ENSMUSG00000006169	OMA04387	Yes	No	No	No	No	No	No	No	No	NA	Clint1 clathrin interactor 1	PREDICTED: clathrin interactor 1	clathrin interactor 1 isoform X1	PREDICTED: clathrin interactor 1 isoform X1 [Camelus ferus]
ENSMUSG00000006191	OMA03312	Yes	No	No	No	No	No	No	No	No	NA	Cdkal1 CDK5 regulatory subunit associated protein 1-like 1	threonylcarbamoyladenosine tRNA methylthiotransferase	threonylcarbamoyladenosine tRNA methylthiotransferase isoform X1	PREDICTED: threonylcarbamoyladenosine tRNA methylthiotransferase isoform X1 [Macaca fascicularis]
ENSMUSG00000006200	NA	No	Act:-8.04	NA	NA	NA	NA	NA	NA	NA	NA	Rhox6 reproductive homeobox 6	NA	NA	NA
ENSMUSG00000006204	OMA16612	No	Act:-8.62	NA	NA	NA	No	No	NA	NA	NA	5430419D17Rik RIKEN cDNA 5430419D17 gene	NA	deleted in malignant brain tumors 1 protein isoform X2	NA
ENSMUSG00000006219++	OMA15563	Yes	No	Yes	No	NA	NA	NA	NA	NA	Yes	Fblim1 filamin binding LIM protein 1	filamin-binding LIM protein 1	NA	NA
ENSMUSG00000006269	OMA03289	No	No	Yes	No	NA	NA	NA	NA	NA	NA	Atp6v1b1 ATPase, H+ transporting, lysosomal V1 subunit B1	V-type proton ATPase subunit B, kidney isoform	NA	NA
ENSMUSG00000006276	OMA03343	No	No	No	No	No	No	No	No	Rep:1.36	No	Eps15l1 epidermal growth factor receptor pathway substrate 15-like 1	epidermal growth factor receptor substrate 15-like 1	epidermal growth factor receptor substrate 15-like 1 isoform X4	epidermal growth factor receptor substrate 15-like 1 [Bos taurus]
ENSMUSG00000006281	OMA02718	No	No	No	Rep:1.43	No	No	Rep:1.58	NA	NA	No	Tep1 telomerase associated protein 1	PREDICTED: telomerase protein component 1 isoform X1	telomerase protein component 1	NA
ENSMUSG00000006288	OMA08284	No	No	No	Act:-1.03	No	No	Rep:0.55	No	No	NA	Ttc5 tetratricopeptide repeat domain 5	tetratricopeptide repeat protein 5	tetratricopeptide repeat protein 5	Tetratricopeptide repeat protein 5 [Crassostrea gigas]
ENSMUSG00000006299	OMA07015	No	No	No	Act:-1.76	No	No	No	No	No	No	Aamp angio-associated migratory protein	angio-associated migratory cell protein	angio-associated migratory cell protein	Angio-associated migratory cell protein [Salmo salar]
ENSMUSG00000006304	OMA06588	No	No	No	No	Yes	No	No	Yes	No	No	Arpc2 actin related protein 2/3 complex, subunit 2	actin-related protein 2/3 complex subunit 2	actin-related protein 2/3 complex subunit 2	actin related protein 2/3 complex subunit 2 [Salmo salar]
ENSMUSG00000006313	OMA28707	No	No	NA	NA	Yes	NA	NA	NA	NA	NA	Upk1a uroplakin 1A	NA	NA	NA
ENSMUSG00000006333	OMA11666	No	No	No	No	No	No	Act:-1.08	No	No	No	Rps9 ribosomal protein S9	PREDICTED: 40S ribosomal protein S9	40S ribosomal protein S9	S9 [Suberites domuncula]
ENSMUSG00000006342	OMA05836	No	No	No	Act:-1.33	NA	No	No	No	Rep:1.81	NA	Susd2 sushi domain containing 2	PREDICTED: sushi domain-containing protein 2 isoform X1	sushi domain-containing protein 2-like	Sushi domain-containing protein 2 [Tupaia chinensis]
ENSMUSG00000006356	OMA12101	No	No	No	No	NA	No	No	No	Act:-1.13	NA	Crip2 cysteine rich protein 2	cysteine-rich protein 2	cysteine-rich protein 2	cysteine-rich protein 1 [Ictalurus furcatus]
ENSMUSG00000006362	OMA04306	No	No	No	No	NA	No	Act:-1.21	NA	NA	NA	Cbfa2t3 core-binding factor, runt domain, alpha subunit 2, translocated to, 3 (human)	PREDICTED: protein CBFA2T3 isoform X1	protein CBFA2T1 isoform X1	NA
ENSMUSG00000006369	OMA14160	No	No	NA	NA	No	No	Rep:1.16	No	No	NA	Fbln1 fibulin 1	NA	fibrillin-1	Ci-META1 precursor [Ciona intestinalis]
ENSMUSG00000006378	OMA06099	No	No	No	Act:-1.20	No	No	No	No	No	No	Gcat glycine C-acetyltransferase (2-amino-3-ketobutyrate-coenzyme A ligase)	2-amino-3-ketobutyrate coenzyme A ligase, mitochondrial	2-amino-3-ketobutyrate coenzyme A ligase, mitochondrial isoform X1	2-amino-3-ketobutyrate coenzyme a ligase [Anopheles darlingi]
ENSMUSG00000006386	OMA01824	No	No	No	No	Yes	NA	NA	NA	NA	NA	Tek endothelial-specific receptor tyrosine kinase	PREDICTED: angiopoietin-1 receptor	NA	NA
ENSMUSG00000006398	OMA04797	No	No	No	No	No	No	No	No	No	Yes	Cdc20 cell division cycle 20	cell division cycle protein 20 homolog	cell division cycle protein 20 homolog	Cdc20 [Branchiostoma floridae]
ENSMUSG00000006423	OMA09475	No	No	No	No	No	No	No	No	No	Yes	C330007P06Rik RIKEN cDNA C330007P06 gene	UPF0428 protein CXorf56 homolog	UPF0428 protein CXorf56 homolog	UPF0428 protein CXorf56 homolog-like [Taeniopygia guttata]
ENSMUSG00000006435	OMA04743	Yes	No	Yes	No	No	No	No	NA	NA	NA	Neurl1a neuralized E3 ubiquitin protein ligase 1A	E3 ubiquitin-protein ligase NEURL1	E3 ubiquitin-protein ligase NEURL1B	NA
ENSMUSG00000006442	OMA07835	No	No	No	No	No	Yes	Act:-1.17	No	Rep:1.01	No	Srm spermidine synthase	PREDICTED: spermidine synthase isoform X1	spermidine synthase	spermidine synthase [Xenopus laevis]
ENSMUSG00000006445	OMA01746	No	No	No	No	Yes	NA	NA	NA	NA	NA	Epha2 Eph receptor A2	ephrin type-A receptor 2 precursor	NA	NA
ENSMUSG00000006469	OMA07190	No	No	No	Act:-1.35	NA	No	No	No	No	NA	Slc34a3 solute carrier family 34 (sodium phosphate), member 3	PREDICTED: sodium-dependent phosphate transport protein 2C	sodium-dependent phosphate transport protein 2B-like	NaPi II-like protein [Eptatretus stoutii]
ENSMUSG00000006498	OMA03280	No	No	No	No	Yes	No	No	No	No	NA	Ptbp1 polypyrimidine tract binding protein 1	polypyrimidine tract-binding protein 1	polypyrimidine tract-binding protein 1 isoform X2	Chain A, Nmr, Representative Structure
ENSMUSG00000006519	OMA14882	No	No	No	Rep:1.00	NA	No	No	No	No	No	Cyba cytochrome b-245, alpha polypeptide	cytochrome b-245 alpha polypeptide	cytochrome b-245 light chain	p22phox protein [Takifugu rubripes]
ENSMUSG00000006538	OMA11887	No	No	No	No	Yes	Yes	Act:-2.31	Yes	No	NA	Ihh Indian hedgehog	PREDICTED: indian hedgehog protein isoform X1	hedgehog precursor	tiggy-winkle hedgehog protein-like [Exaiptasia pallida]
ENSMUSG00000006542	OMA09601	No	No	No	Act:-1.25	NA	NA	NA	NA	NA	NA	Prkag3 protein kinase, AMP-activated, gamma 3 non-catatlytic subunit	5'-AMP-activated protein kinase subunit gamma-3	NA	NA
ENSMUSG00000006574	OMA03628	No	No	No	No	NA	NA	NA	No	Rep:1.15	NA	Slc4a1 solute carrier family 4 (anion exchanger), member 1	PREDICTED: band 3 anion transport protein isoform X1	NA	Anion exchange protein 3 [Podiceps cristatus]
ENSMUSG00000006575	OMA05720	No	No	No	Rep:1.11	NA	No	No	NA	NA	NA	Rundc3a RUN domain containing 3A	RUN domain-containing protein 3A	RUN domain-containing protein 3B	NA
ENSMUSG00000006576	OMA02210	Yes	No	No	No	NA	No	Rep:0.92	No	No	NA	Slc4a3 solute carrier family 4 (anion exchanger), member 3	PREDICTED: anion exchange protein 3 isoform X1	band 3 anion transport protein isoform X3	solute carrier family 4 (anion exchanger), member 2b [Danio rerio]
ENSMUSG00000006586	OMA01806	Yes	No	No	No	NA	No	Act:-1.21	No	No	NA	Runx1t1 runt-related transcription factor 1; translocated to, 1 (cyclin D-related)	PREDICTED: protein CBFA2T1 isoform X1	protein CBFA2T1 isoform X1	protein CBFA2T3-like isoform X3 [Exaiptasia pallida]
ENSMUSG00000006589	OMA18399	No	No	No	Act:-1.85	No	No	Act:-0.65	No	No	No	Aprt adenine phosphoribosyl transferase	adenine phosphoribosyltransferase	adenine phosphoribosyltransferase, partial	adenine phosphoribosyltransferase [Danio rerio]
ENSMUSG00000006641	OMA09126	No	No	No	No	NA	No	No	No	Rep:1.56	NA	Slc5a6 solute carrier family 5 (sodium-dependent vitamin transporter), member 6	sodium-dependent multivitamin transporter	sodium-dependent multivitamin transporter	Sodium-dependent multivitamin transporter [Pteropus alecto]
ENSMUSG00000006675	OMA07176	No	No	Yes	No	NA	No	No	NA	NA	NA	P4htm prolyl 4-hydroxylase, transmembrane (endoplasmic reticulum)	PREDICTED: transmembrane prolyl 4-hydroxylase	transmembrane prolyl 4-hydroxylase isoform X1	NA
ENSMUSG00000006699	OMA09702	No	No	No	No	NA	No	Act:-0.43	No	No	No	Cdc42 cell division cycle 42	cell division control protein 42 homolog isoform 1	cell division cycle 42 (GTP binding protein, 25kDa)-like isoform X1	cell division cycle 42 isoform 2 [Xenopus (Silurana) tropicalis]
ENSMUSG00000006717	OMA18247	No	No	No	No	No	No	No	No	Act:-1.16	No	Acot13 acyl-CoA thioesterase 13	acyl-coenzyme A thioesterase 13	acyl-coenzyme A thioesterase 13 isoform X2	thioesterase superfamily member 2 [Anopheles darlingi]
ENSMUSG00000006724	OMA09811	No	No	No	Rep:1.02	NA	No	Act:-1.53	No	No	NA	Cyp27b1 cytochrome P450, family 27, subfamily b, polypeptide 1	25-hydroxyvitamin D-1 alpha hydroxylase, mitochondrial	cholesterol 24-hydroxylase	Putative cytochrome P450 CYP44 [Crassostrea gigas]
ENSMUSG00000006736	OMA14757	No	No	No	No	No	No	Rep:0.54	No	No	NA	Tspan31 tetraspanin 31	tetraspanin-31	tetraspanin-31 isoform X1	Tetraspanin-31 [Crassostrea gigas]
ENSMUSG00000006764	OMA04638	No	No	No	No	Yes	No	No	NA	NA	NA	Tph2 tryptophan hydroxylase 2	PREDICTED: tryptophan 5-hydroxylase 2	tryptophan 5-hydroxylase 1 isoform X2	NA
ENSMUSG00000006777	OMA17093	No	No	No	Act:-2.31	NA	NA	NA	NA	NA	NA	Krt23 keratin 23	PREDICTED: keratin, type I cytoskeletal 23-like	NA	NA
ENSMUSG00000006782	OMA12388	No	No	No	Rep:1.09	NA	No	No	NA	NA	NA	Cnp 2',3'-cyclic nucleotide 3' phosphodiesterase	PREDICTED: 2',3'-cyclic-nucleotide 3'-phosphodiesterase isoform X1	2',3'-cyclic-nucleotide 3'-phosphodiesterase-like isoform X1	NA
ENSMUSG00000006800	OMA01409	No	No	No	No	No	NA	NA	Yes	No	NA	Sulf2 sulfatase 2	extracellular sulfatase Sulf-2 precursor	NA	Extracellular sulfatase Sulf-2 [Pygoscelis adeliae]
ENSMUSG00000006818	OMA11083	No	No	No	No	No	No	Rep:0.92	No	No	No	Sod2 superoxide dismutase 2, mitochondrial	superoxide dismutase	superoxide dismutase	manganese superoxide dismutase [Oplegnathus fasciatus]
ENSMUSG00000006920	OMA02234	No	No	No	No	NA	No	Rep:0.52	NA	NA	NA	Ezh1 enhancer of zeste 1 polycomb repressive complex 2 subunit	PREDICTED: histone-lysine N-methyltransferase EZH1	histone-lysine N-methyltransferase EZH2 isoform X2	NA
ENSMUSG00000006931	OMA09538	No	No	Yes	No	NA	NA	NA	NA	NA	NA	P3h4 prolyl 3-hydroxylase family member 4 (non-enzymatic)	synaptonemal complex protein SC65 precursor	NA	NA
ENSMUSG00000006932	OMA00866	No	No	Yes	No	Yes	No	No	Yes	No	NA	Ctnnb1 catenin (cadherin associated protein), beta 1	catenin beta-1	beta-catenin	beta-catenin [Chaetopterus variopedatus]
ENSMUSG00000006958	OMA04933	Yes	No	Yes	No	NA	No	No	Yes	No	NA	Chrd chordin	chordin precursor	chordin-like isoform X1	chordin [Nematostella vectensis]
ENSMUSG00000006998	OMA00808	No	No	No	No	No	No	No	No	Rep:1.34	No	Psmd2 proteasome (prosome, macropain) 26S subunit, non-ATPase, 2	26S proteasome non-ATPase regulatory subunit 2	26S proteasome non-ATPase regulatory subunit 2	26S proteasome non-ATPase regulatory subunit 2 [Danio rerio]
ENSMUSG00000007034	OMA04806	No	No	No	No	NA	No	Rep:0.46	NA	NA	NA	Slc44a4 solute carrier family 44, member 4	PREDICTED: choline transporter-like protein 4	choline transporter-like protein 2 isoform X1	NA
ENSMUSG00000007035	OMA04871	No	No	No	No	NA	No	No	Yes	No	No	Msh5 mutS homolog 5	PREDICTED: mutS protein homolog 5	mutS protein homolog 5-like	MutS-like protein 5 [Crassostrea gigas]
ENSMUSG00000007038	OMA11320	No	No	No	No	NA	No	No	No	Act:-1.53	NA	Neu1 neuraminidase 1	PREDICTED: sialidase-1 isoform X1	sialidase-1	sialidase 1 (lysosomal sialidase) precursor [Oryzias latipes]
ENSMUSG00000007097	OMA00589	Yes	No	Yes	No	No	No	Act:-0.74	Yes	No	No	Atp1a2 ATPase, Na+/K+ transporting, alpha 2 polypeptide	ATPase, Na+/K+ transporting, alpha 2 polypeptide	sodium/potassium ATPase alpha subunit isoform X2	AGAP002858-PC [Anopheles gambiae str. PEST]
ENSMUSG00000007122	OMA08889	No	No	No	Act:-1.37	NA	NA	NA	NA	NA	NA	Casq1 calsequestrin 1	calsequestrin-1 precursor	NA	NA
ENSMUSG00000007209	OMA28521	No	No	No	Rep:1.82	NA	NA	NA	NA	NA	NA	Ceacam9 carcinoembryonic antigen-related cell adhesion molecule 9	PREDICTED: carcinoembryonic antigen-related cell adhesion molecule 1-like	NA	NA
ENSMUSG00000007279	OMA01590	No	No	Yes	No	NA	No	No	NA	NA	NA	Scube2 signal peptide, CUB domain, EGF-like 2	signal peptide, CUB and EGF-like domain-containing protein 2 precursor	signal peptide, CUB and EGF-like domain-containing protein 1 isoform X8	NA
ENSMUSG00000007379	OMA03400	Yes	Act:-3.59	Yes	No	NA	No	No	NA	NA	NA	Dennd2c DENN/MADD domain containing 2C	DENN domain-containing protein 2C	DENN domain-containing protein 2A isoform X1	NA
ENSMUSG00000007411	OMA01266	No	No	No	Rep:2.69	NA	NA	NA	Yes	No	NA	Mark3 MAP/microtubule affinity regulating kinase 3	PREDICTED: MAP/microtubule affinity-regulating kinase 3 isoform X1	NA	ELKL motif kinase 2 short form [Mus musculus]
ENSMUSG00000007480	OMA08005	No	No	Yes	No	NA	No	No	No	No	NA	Mc5r melanocortin 5 receptor	melanocortin receptor 5	dopamine receptor 2-like	dopamine D1/beta receptor [Branchiostoma lanceolatum]
ENSMUSG00000007594	OMA10894	No	No	No	Rep:1.08	NA	NA	NA	NA	NA	NA	Hapln4 hyaluronan and proteoglycan link protein 4	PREDICTED: hyaluronan and proteoglycan link protein 4, partial	NA	NA
ENSMUSG00000007613	OMA03837	Yes	No	No	No	NA	NA	NA	No	No	NA	Tgfbr1 transforming growth factor, beta receptor I	TGF-beta receptor type-1 precursor	NA	NvAlk2-like
ENSMUSG00000007653	OMA03199	Yes	No	No	No	No	No	No	No	No	NA	Gabrb2 gamma-aminobutyric acid (GABA) A receptor, subunit beta 2	gamma-aminobutyric acid receptor subunit beta-2 precursor	gamma-aminobutyric acid receptor subunit beta-2-like isoform X2	gamma-aminobutyric acid receptor subunit beta-4 isoform 1 precursor [Gallus gallus]
ENSMUSG00000007655	OMA15184	Yes	No	No	Act:-2.11	Yes	No	No	No	No	NA	Cav1 caveolin 1, caveolae protein	caveolin-1	caveolin-3-like	Caveolin domain containing protein [Haemonchus contortus]
ENSMUSG00000007670	OMA02747	No	No	No	No	Yes	NA	NA	NA	NA	NA	Khsrp KH-type splicing regulatory protein	far upstream element-binding protein 2	NA	NA
ENSMUSG00000007682	OMA10873	No	No	No	No	Yes	NA	NA	Yes	Rep:1.07	NA	Dio2 deiodinase, iodothyronine, type II	type II iodothyronine deiodinase	NA	type III iodothyronine deiodinase b [Takifugu rubripes]
ENSMUSG00000007815	OMA10120	No	No	No	No	No	No	Act:-1.04	No	No	No	Rhoa ras homolog family member A	transforming protein RhoA	ras homolog gene family, member C-like isoform X1	Rho GTPase protein [Platynereis dumerilii]
ENSMUSG00000007850	OMA05648	No	No	No	No	No	No	Act:-0.55	No	No	NA	Hnrnph1 heterogeneous nuclear ribonucleoprotein H1	heterogeneous nuclear ribonucleoprotein H	heterogeneous nuclear ribonucleoprotein H-like isoform X2	heterogeneous nuclear ribonucleoprotein H3 (2H9) [Xenopus (Silurana) tropicalis]
ENSMUSG00000007872	OMA22133	No	No	Yes	No	NA	NA	NA	NA	NA	NA	Id3 inhibitor of DNA binding 3	DNA-binding protein inhibitor ID-3	NA	NA
ENSMUSG00000007877	OMA22008	No	No	No	Act:-2.43	NA	NA	NA	NA	NA	NA	Tcap titin-cap	PREDICTED: telethonin	NA	NA
ENSMUSG00000007880	OMA00395	Yes	No	Yes	No	NA	No	No	NA	NA	NA	Arid1a AT rich interactive domain 1A (SWI-like)	PREDICTED: AT-rich interactive domain-containing protein 1A	AT-rich interactive domain-containing protein 1A isoform X4	NA
ENSMUSG00000007891	OMA08395	No	No	No	No	No	No	No	Yes	No	Yes	Ctsd cathepsin D	cathepsin D-like precursor	lysosomal aspartic protease	cathepsin D [Pinctada maxima]
ENSMUSG00000007987	OMA15910	No	No	No	No	No	No	No	Yes	No	NA	Ift22 intraflagellar transport 22	intraflagellar transport protein 22 homolog	intraflagellar transport protein 22 homolog	Rab-like protein 5 [Osmerus mordax]
ENSMUSG00000008090	OMA06771	No	No	Yes	No	No	Yes	Act:-0.99	NA	NA	NA	Fgfrl1 fibroblast growth factor receptor-like 1	fibroblast growth factor receptor-like 1 precursor	Fibroblast growth factor receptor-like 1 precursor	NA
ENSMUSG00000008136	OMA07954	Yes	No	No	No	NA	No	No	NA	NA	NA	Fhl2 four and a half LIM domains 2	four and a half LIM domains protein 2	prickle planar cell polarity protein 3-B-like	NA
ENSMUSG00000008167	OMA09902	No	No	No	No	NA	No	Rep:0.54	No	No	NA	Fbxw9 F-box and WD-40 domain protein 9	F-box/WD repeat-containing protein 9	F-box/WD repeat-containing protein 9	F-box/WD repeat-containing protein 9 [Crassostrea gigas]
ENSMUSG00000008200	OMA18181	Yes	No	NA	NA	No	No	No	No	No	NA	Fnbp4 formin binding protein 4	NA	formin-binding protein 4	Formin-binding protein 4;
ENSMUSG00000008206	OMA13561	No	No	Yes	No	NA	NA	NA	NA	NA	NA	Cers4 ceramide synthase 4	PREDICTED: ceramide synthase 4	NA	NA
ENSMUSG00000008305	OMA01085	Yes	No	Yes	No	Yes	No	No	NA	NA	NA	Tle1 transducin-like enhancer of split 1	transducin-like enhancer protein 1	transducin-like enhancer protein 4 isoform X4	NA
ENSMUSG00000008333	OMA10816	No	No	No	No	NA	No	Act:-0.86	NA	NA	NA	Snrpb2 U2 small nuclear ribonucleoprotein B	U2 small nuclear ribonucleoprotein B''	U2 small nuclear ribonucleoprotein B''-like	NA
ENSMUSG00000008348	OMA00993	No	No	No	No	Yes	No	Rep:1.29	NA	NA	NA	Ubc ubiquitin C	PREDICTED: polyubiquitin-B	polyubiquitin-C	NA
ENSMUSG00000008435	OMA09971	No	No	No	No	Yes	No	No	No	No	No	Rdh13 retinol dehydrogenase 13 (all-trans and 9-cis)	retinol dehydrogenase 13	retinol dehydrogenase 13	Retinol dehydrogenase 13 [Crassostrea gigas]
ENSMUSG00000008475	OMA14952	No	No	No	No	No	No	Act:-0.56	No	No	No	Arpc5 actin related protein 2/3 complex, subunit 5	actin-related protein 2/3 complex subunit 5	actin-related protein 2/3 complex subunit 5-B	actin-related protein 2/3 complex 16kDa subunit [Aurelia aurita]
ENSMUSG00000008540	OMA18691	Yes	No	No	No	No	No	No	NA	NA	NA	Mgst1 microsomal glutathione S-transferase 1	microsomal glutathione S-transferase 1	microsomal glutathione S-transferase 1-like	NA
ENSMUSG00000008590	OMA11412	No	No	No	No	NA	No	Act:-1.37	NA	NA	NA	Htr3b 5-hydroxytryptamine (serotonin) receptor 3B	PREDICTED: 5-hydroxytryptamine receptor 3B	neuronal acetylcholine receptor subunit alpha-10	NA
ENSMUSG00000008658	OMA05666	Yes	No	Yes	No	NA	No	Rep:0.93	NA	NA	NA	Rbfox1 RNA binding protein, fox-1 homolog (C. elegans) 1	PREDICTED: RNA binding protein fox-1 homolog 1 isoform X1	RNA binding protein fox-1 homolog 3 isoform X7	NA
ENSMUSG00000008668	OMA12148	No	No	No	No	No	No	Act:-1.08	No	No	Yes	Rps18 ribosomal protein S18	ribosomal protein S18	40S ribosomal protein S18	40S ribosomal protein S18 [Danio rerio]
ENSMUSG00000008683	OMA13410	No	No	No	No	No	No	Act:-1.23	No	No	No	Rps15a ribosomal protein S15A	40S ribosomal protein S15a	40S ribosomal protein S15a	40S ribosomal protein S15a [Pectinaria gouldii]
ENSMUSG00000008690	OMA09664	No	No	No	No	No	No	Rep:0.95	No	No	No	Ncaph2 non-SMC condensin II complex, subunit H2	condensin-2 complex subunit H2	condensin-2 complex subunit H2	condensin-2 complex subunit H2 isoform 2 [Homo sapiens]
ENSMUSG00000008730	OMA00581	No	No	Yes	No	Yes	NA	NA	NA	NA	NA	Hipk1 homeodomain interacting protein kinase 1	homeodomain-interacting protein kinase 1	NA	NA
ENSMUSG00000008734	OMA07742	No	No	No	No	Yes	NA	NA	NA	NA	NA	Gprc5b G protein-coupled receptor, family C, group 5, member B	PREDICTED: G-protein coupled receptor family C group 5 member B isoform X1	NA	NA
ENSMUSG00000008843	NA	No	Act:-7.71	NA	NA	NA	NA	NA	NA	NA	NA	Cldn13 claudin 13	NA	NA	NA
ENSMUSG00000008859	OMA08986	No	No	No	No	No	No	No	No	No	Yes	Rala v-ral simian leukemia viral oncogene A (ras related)	ras-related protein Ral-A	ras-related protein Ral-A	RAS, putative [Ixodes scapularis]
ENSMUSG00000008932	OMA03441	Yes	No	No	No	NA	NA	NA	Yes	No	NA	Slc1a7 solute carrier family 1 (glutamate transporter), member 7	PREDICTED: excitatory amino acid transporter 5	NA	excitatory amino acid transporter 4 [Danio rerio]
ENSMUSG00000008999	OMA04780	No	No	No	No	NA	No	No	NA	NA	NA	Bmp7 bone morphogenetic protein 7	bone morphogenetic protein 7	protein DVR-1 homolog precursor	NA
ENSMUSG00000009030	OMA12812	Yes	No	No	No	No	No	Act:-0.72	NA	NA	No	Pdcl phosducin-like	phosducin-like protein	phosducin-like protein	NA
ENSMUSG00000009035	OMA04925	No	No	Yes	No	No	NA	NA	No	No	No	Tmem184b transmembrane protein 184b	transmembrane protein 184B	NA	Transmembrane protein 184B [Haliaeetus albicilla]
ENSMUSG00000009073	OMA02404	No	No	No	No	NA	No	No	Yes	No	No	Nf2 neurofibromin 2	merlin	merlin	Merlin [Zootermopsis nevadensis]
ENSMUSG00000009076	OMA19431	No	No	No	No	Yes	No	No	No	No	NA	Zmat5 zinc finger, matrin type 5	zinc finger matrin-type protein 5	zinc finger matrin-type protein 5	zinc finger matrin-type protein 5 isoform 1 [Gallus gallus]
ENSMUSG00000009216	OMA16864	Yes	No	No	No	NA	NA	NA	NA	NA	NA	Fam163b family with sequence similarity 163, member B	protein FAM163B	NA	NA
ENSMUSG00000009246	OMA03969	No	No	Yes	No	NA	No	No	NA	NA	NA	Trpm5 transient receptor potential cation channel, subfamily M, member 5	PREDICTED: transient receptor potential cation channel subfamily M member 4 isoform X1	transient receptor potential cation channel subfamily M member 2 isoform X2	NA
ENSMUSG00000009350	OMA05075	No	No	No	Rep:1.52	NA	No	No	NA	NA	NA	Mpo myeloperoxidase	PREDICTED: myeloperoxidase-like	lactoperoxidase	NA
ENSMUSG00000009356	OMA20682	No	No	NA	NA	No	No	Rep:1.49	NA	NA	NA	Lpo lactoperoxidase	NA	peroxidasin homolog isoform X2	NA
ENSMUSG00000009376	OMA01105	Yes	No	No	No	NA	NA	NA	NA	NA	NA	Met met proto-oncogene	PREDICTED: hepatocyte growth factor receptor	NA	NA
ENSMUSG00000009378	OMA06300	No	No	No	No	No	No	Rep:3.60	No	No	NA	Slc16a12 solute carrier family 16 (monocarboxylic acid transporters), member 12	monocarboxylate transporter 12	monocarboxylate transporter 12-like	solute carrier family 16 (monocarboxylic acid transporters), member 14, isoform CRA_b [Mus musculus]
ENSMUSG00000009418	OMA00673	No	No	Yes	No	No	NA	NA	NA	NA	NA	Nav1 neuron navigator 1	PREDICTED: neuron navigator 1 isoform X1	NA	NA
ENSMUSG00000009471	OMA12019	No	No	Yes	Act:-1.86	NA	No	No	NA	NA	NA	Myod1 myogenic differentiation 1	myoblast determination protein 1	transcription factor SUM-1-like	NA
ENSMUSG00000009545	OMA03429	Yes	No	No	No	No	No	No	NA	NA	NA	Kcnq1 potassium voltage-gated channel, subfamily Q, member 1	PREDICTED: potassium voltage-gated channel subfamily KQT member 1	potassium voltage-gated channel subfamily KQT member 1 isoform X1	NA
ENSMUSG00000009549	OMA17630	No	No	No	No	NA	No	Rep:0.46	No	No	No	Srp14 signal recognition particle 14	signal recognition particle 14 kDa protein	signal recognition particle 14 kDa protein	signal recognition particle 14 kDa protein [Trichuris trichiura]
ENSMUSG00000009566	OMA06287	No	No	No	No	Yes	No	No	No	No	NA	Fpgs folylpolyglutamyl synthetase	folylpolyglutamate synthase, mitochondrial	folylpolyglutamate synthase, mitochondrial-like isoform X1	Folylpolyglutamate synthase [Chelonia mydas]
ENSMUSG00000009569	OMA02853	No	No	No	No	NA	No	No	Yes	No	NA	Mkl2 MKL/myocardin-like 2	MKL/myocardin-like protein 2	myocardin-related transcription factor A	MKL/myocardin-like protein 1 [Exaiptasia pallida]
ENSMUSG00000009588	OMA13651	No	No	No	No	NA	No	Rep:0.75	NA	NA	NA	St6galnac1 ST6 (alpha-N-acetyl-neuraminyl-2,3-beta-galactosyl-1,3)-N-acetylgalactosaminide alpha-2,6-sialyltransferase 1	PREDICTED: alpha-N-acetylgalactosaminide alpha-2,6-sialyltransferase 1	alpha-N-acetylgalactosaminide alpha-2,6-sialyltransferase 2-like	NA
ENSMUSG00000009640	OMA04453	No	No	Yes	No	No	No	No	No	No	No	Dmap1 DNA methyltransferase 1-associated protein 1	DNA methyltransferase 1-associated protein 1	DNA methyltransferase 1-associated protein 1 isoform X2	DNA methyltransferase 1 associated protein 1 [Xenopus (Silurana) tropicalis]
ENSMUSG00000009646++	OMA13976	Yes	No	Yes	No	NA	NA	NA	NA	NA	No	Pla2g12b phospholipase A2, group XIIB	group XIIB secretory phospholipase A2-like protein precursor	NA	NA
ENSMUSG00000009647	OMA07993	Yes	No	No	No	NA	No	No	No	No	No	Mcu mitochondrial calcium uniporter	calcium uniporter protein, mitochondrial	calcium uniporter protein, mitochondrial-like	calcium uniporter protein, mitochondrial [Danio rerio]
ENSMUSG00000009670	OMA09623	No	No	No	No	Yes	No	No	No	No	NA	Tex11 testis expressed gene 11	PREDICTED: testis-expressed sequence 11 protein	testis-expressed protein 11-like	testis protein TEX11 [Homo sapiens]
ENSMUSG00000009681	OMA01089	No	No	No	No	No	No	No	Yes	No	NA	Bcr breakpoint cluster region	breakpoint cluster region protein	active breakpoint cluster region-related protein isoform X1	PREDICTED: active breakpoint cluster region-related protein isoform X3 [Cricetulus griseus]
ENSMUSG00000009731	OMA03250	No	No	Yes	Act:-1.73	NA	NA	NA	NA	NA	NA	Kcnd1 potassium voltage-gated channel, Shal-related family, member 1	PREDICTED: potassium voltage-gated channel subfamily D member 1	NA	NA
ENSMUSG00000009739	OMA06986	No	Act:-5.89	No	No	NA	NA	NA	NA	NA	NA	Pou6f1 POU domain, class 6, transcription factor 1	POU domain, class 6, transcription factor 1	NA	NA
ENSMUSG00000009772	OMA07971	No	No	Yes	No	NA	NA	NA	NA	NA	NA	Nuak2 NUAK family, SNF1-like kinase, 2	NUAK family SNF1-like kinase 2	NA	NA
ENSMUSG00000009828	OMA07680	No	No	No	No	No	No	Rep:0.88	No	No	NA	Ick intestinal cell kinase	serine/threonine-protein kinase MAK	serine/threonine-protein kinase dyf-5	rck [Mus musculus]
ENSMUSG00000009876	OMA20231	Yes	No	Yes	No	No	NA	NA	NA	NA	NA	Cox4i2 cytochrome c oxidase subunit 4I2	cytochrome c oxidase subunit 4I2	NA	NA
ENSMUSG00000009927	OMA14524	No	No	No	No	No	No	Act:-1.17	No	No	No	Rps25 ribosomal protein S25	40S ribosomal protein S25	40S ribosomal protein S25	putative ribosomal protein S25 [Sipunculus nudus]
ENSMUSG00000009995	OMA10730	No	No	No	No	No	No	No	Yes	No	No	Taz tafazzin	tafazzin	tafazzin	tafazzin [Ictalurus punctatus]
ENSMUSG00000010021	OMA02416	No	No	No	No	NA	No	Rep:0.83	No	No	NA	Kif19a kinesin family member 19A	PREDICTED: kinesin-like protein KIF19	kinesin-like protein KIF19	kinesin-like protein KIF19 [Xenopus laevis]
ENSMUSG00000010025	OMA07283	Yes	No	No	No	No	No	Rep:0.62	No	No	No	Aldh3a2 aldehyde dehydrogenase family 3, subfamily A2	fatty aldehyde dehydrogenase	aldehyde dehydrogenase family 3 member A2 isoform X3	Fatty aldehyde dehydrogenase [Egretta garzetta]
ENSMUSG00000010047	OMA12229	No	No	Yes	No	NA	No	No	No	No	NA	Hyal2 hyaluronoglucosaminidase 2	hyaluronidase-2 precursor	hyaluronidase isoform X1	PREDICTED: hyaluronidase-1 [Columba livia]
ENSMUSG00000010048	OMA09889	Yes	No	No	No	NA	NA	NA	NA	NA	NA	Ifrd2 interferon-related developmental regulator 2	PREDICTED: interferon-related developmental regulator 2	NA	NA
ENSMUSG00000010064	OMA05348	No	Rep:1.60	No	No	No	No	Act:-0.84	NA	NA	NA	Slc38a3 solute carrier family 38, member 3	sodium-coupled neutral amino acid transporter 3	probable sodium-coupled neutral amino acid transporter 6 isoform X2	NA
ENSMUSG00000010080	OMA15220	No	No	NA	NA	NA	No	Rep:0.38	NA	NA	NA	Epn3 epsin 3	NA	epsin-2	NA
ENSMUSG00000010311	OMA16449	No	No	Yes	No	NA	NA	NA	NA	NA	NA	Optc opticin	opticin precursor	NA	NA
ENSMUSG00000010362	OMA17488	Yes	No	No	No	NA	NA	NA	No	No	NA	Rdm1 RAD52 motif 1	PREDICTED: RAD52 motif-containing protein 1 isoform X1	NA	RAD52 motif-containing protein 1 [Crassostrea gigas]
ENSMUSG00000010376	OMA18825	No	No	No	No	NA	No	No	NA	NA	Yes	Nedd8 neural precursor cell expressed, developmentally down-regulated gene 8	neural precursor cell expressed, developmentally down-regulated 8	NEDD8	NA
ENSMUSG00000010453	OMA02389	No	No	No	No	No	No	Rep:1.32	No	No	NA	Kansl3 KAT8 regulatory NSL complex subunit 3	KAT8 regulatory NSL complex subunit 3	KAT8 regulatory NSL complex subunit 3	KAT8 regulatory NSL complex subunit 3 [Mus musculus]
ENSMUSG00000010461	OMA02289	No	No	No	No	Yes	No	No	NA	NA	NA	Eya4 EYA transcriptional coactivator and phosphatase 4	PREDICTED: eyes absent homolog 4 isoform X1	eyes absent homolog 1 isoform X1	NA
ENSMUSG00000010476	OMA01666	No	No	Yes	No	No	NA	NA	Yes	No	NA	Ebf3 early B cell factor 3	PREDICTED: transcription factor COE3 isoform X10	NA	COE
ENSMUSG00000010517	OMA02354	Yes	No	No	No	No	No	No	Yes	No	No	Faf1 Fas-associated factor 1	PREDICTED: FAS-associated factor 1	FAS-associated factor 1	FAS-associated factor 1 [Mus musculus]
ENSMUSG00000010592	OMA15489	No	No	No	No	No	NA	NA	Yes	Act:-1.32	NA	Dazl deleted in azoospermia-like	deleted in azoospermia-like	NA	RecName: Full=DAZ protein 1 [Caenorhabditis elegans]
ENSMUSG00000010608	OMA01321	No	No	No	No	No	No	Rep:0.48	No	No	NA	Rbm25 RNA binding motif protein 25	RNA-binding protein 25	RNA-binding protein 25 isoform X1	RNA-binding protein 25 [Gallus gallus]
ENSMUSG00000010660	OMA04065	No	No	No	No	Yes	No	No	NA	NA	No	Plcd1 phospholipase C, delta 1	PREDICTED: 1-phosphatidylinositol 4,5-bisphosphate phosphodiesterase delta-1	1-phosphatidylinositol 4,5-bisphosphate phosphodiesterase delta-4 isoform X6	NA
ENSMUSG00000010721	OMA04648	Yes	No	No	No	NA	No	No	No	No	No	Lmbr1 limb region 1	limb region 1 protein homolog	protein LMBR1L-like	limb region 1 like, isoform CRA_a [Mus musculus]
ENSMUSG00000010751	OMA24892	Yes	No	No	No	NA	NA	NA	NA	NA	NA	Tnfrsf22 tumor necrosis factor receptor superfamily, member 22	tumor necrosis factor receptor superfamily member 10A precursor	NA	NA
ENSMUSG00000010803	OMA04567	No	No	No	Rep:1.21	NA	NA	NA	No	No	NA	Gabra1 gamma-aminobutyric acid (GABA) A receptor, subunit alpha 1	PREDICTED: gamma-aminobutyric acid receptor subunit alpha-1	NA	GABA-gated chloride channel [Apis mellifera]
ENSMUSG00000010825	OMA02876	No	No	No	Act:-1.73	Yes	No	No	NA	NA	NA	Grid2ip glutamate receptor, ionotropic, delta 2 (Grid2) interacting protein 1	PREDICTED: delphilin isoform X1	delphilin isoform X3	NA
ENSMUSG00000010911	OMA10726	No	No	No	No	Yes	No	Rep:0.69	No	No	No	Apip APAF1 interacting protein	methylthioribulose-1-phosphate dehydratase	uncharacterized protein LOC589826	class II aldolase/adducin, N-terminal domain-containing protein [Dictyostelium purpureum]
ENSMUSG00000011008	OMA05609	No	No	No	No	NA	NA	NA	No	No	Yes	Mcoln2 mucolipin 2	PREDICTED: mucolipin-2 isoform X1	NA	Mucolipin-3 [Columba livia]
ENSMUSG00000011148	OMA04115	No	No	No	Act:-3.05	No	No	Rep:0.51	No	No	No	Adssl1 adenylosuccinate synthetase like 1	adenylosuccinate synthetase isozyme 1	adenylosuccinate synthetase isozyme 1 A	adenylosuccinate synthetase [Homo sapiens]
ENSMUSG00000011171	OMA09403	No	No	No	No	Yes	NA	NA	NA	NA	NA	Vipr2 vasoactive intestinal peptide receptor 2	vasoactive intestinal polypeptide receptor 2 precursor	NA	NA
ENSMUSG00000011179	OMA05109	No	No	No	No	Yes	No	No	No	No	No	Odc1 ornithine decarboxylase, structural 1	ornithine decarboxylase	ornithine decarboxylase	ornithine decarboxylase 1 [Saccoglossus kowalevskii]
ENSMUSG00000011256	OMA04962	No	Act:-1.41	No	No	NA	No	Rep:0.91	NA	NA	NA	Adam19 a disintegrin and metallopeptidase domain 19 (meltrin beta)	disintegrin and metalloproteinase domain-containing protein 19 precursor	ADAM isoform 2	NA
ENSMUSG00000011382	OMA13578	No	No	No	No	No	No	No	Yes	No	No	Dhdh dihydrodiol dehydrogenase (dimeric)	trans-1,2-dihydrobenzene-1,2-diol dehydrogenase	trans-1,2-dihydrobenzene-1,2-diol dehydrogenase	Trans-1,2-dihydrobenzene-1,2-diol dehydrogenase;
ENSMUSG00000011463	OMA10285	Yes	No	No	Act:-1.78	No	No	No	No	Act:-1.03	NA	Cpb1 carboxypeptidase B1 (tissue)	PREDICTED: carboxypeptidase B	carboxypeptidase B	Carboxypeptidase A2 [Chaetura pelagica]
ENSMUSG00000011831	OMA01712	No	No	No	No	No	No	Act:-0.50	No	No	NA	Evi5 ecotropic viral integration site 5	PREDICTED: ecotropic viral integration site 5 protein homolog, partial	EVI5-like protein	EVI5-like protein [Camponotus floridanus]
ENSMUSG00000011832	OMA02875	No	No	No	No	No	No	Act:-0.50	NA	NA	NA	Evi5l ecotropic viral integration site 5 like	EVI5-like protein	EVI5-like protein	NA
ENSMUSG00000011884	OMA13757	No	No	No	No	No	No	Rep:1.19	NA	NA	NA	Gltp glycolipid transfer protein	glycolipid transfer protein	glycolipid transfer protein	NA
ENSMUSG00000012076	OMA06440	No	No	No	No	No	No	Rep:0.84	No	No	NA	Brms1l breast cancer metastasis-suppressor 1-like	breast cancer metastasis-suppressor 1-like protein	breast cancer metastasis-suppressor 1-like protein	breast cancer metastasis-suppressor 1-like protein-A [Danio rerio]
ENSMUSG00000012117	OMA10223	No	No	No	No	NA	No	Rep:1.14	No	No	No	Dhdds dehydrodolichyl diphosphate synthase	dehydrodolichyl diphosphate synthase complex subunit DHDDS	dehydrodolichyl diphosphate synthase complex subunit DHDDS	Dehydrodolichyl diphosphate synthase [Buceros rhinoceros silvestris]
ENSMUSG00000012187	OMA10613	Yes	No	No	No	No	No	Rep:1.24	Yes	No	NA	Mogat1 monoacylglycerol O-acyltransferase 1	2-acylglycerol O-acyltransferase 1	2-acylglycerol O-acyltransferase 2	diacylglycerol O-acyltransferase 2 [Anser anser]
ENSMUSG00000012282	OMA09381	No	No	Yes	No	NA	NA	NA	NA	NA	NA	Wnt8a wingless-type MMTV integration site family, member 8A	protein Wnt-8a precursor	NA	NA
ENSMUSG00000012350	OMA18448	No	No	No	Rep:1.32	NA	No	No	NA	NA	NA	Ehf ets homologous factor	PREDICTED: ETS-related transcription factor Elf-3	ETS-related transcription factor Elf-2 isoform X1	NA
ENSMUSG00000012405	OMA09675	No	No	No	No	No	No	Act:-1.25	No	No	Yes	Rpl15 ribosomal protein L15	60S ribosomal protein L15	60S ribosomal protein L15	60S ribosomal protein L15 [Sycon ciliatum]
ENSMUSG00000012422	OMA20672	No	No	Yes	No	NA	NA	NA	No	No	No	Tmem167 transmembrane protein 167	protein kish-A precursor	NA	Transmembrane protein 167 precursor [Salmo salar]
ENSMUSG00000012519	OMA18457	No	No	No	No	NA	NA	NA	NA	NA	Yes	Mlkl mixed lineage kinase domain-like	PREDICTED: mixed lineage kinase domain-like protein	NA	NA
ENSMUSG00000012520	OMA08075	No	No	Yes	No	NA	NA	NA	NA	NA	NA	Phox2b paired-like homeobox 2b	paired mesoderm homeobox protein 2B	NA	NA
ENSMUSG00000012609	OMA04389	Yes	No	No	No	No	No	Act:-0.70	No	No	NA	Ttll5 tubulin tyrosine ligase-like family, member 5	tubulin polyglutamylase TTLL5	tubulin polyglutamylase TTLL5-like	Tubulin polyglutamylase TTLL5 [Crassostrea gigas]
ENSMUSG00000012848	OMA09960	No	No	No	No	No	No	Act:-1.12	No	No	No	Rps5 ribosomal protein S5	40S ribosomal protein S5	40S ribosomal protein S5	40S ribosomal protein S5 [Sycon ciliatum]
ENSMUSG00000013033	OMA00500	No	No	No	No	NA	No	No	No	Rep:1.83	NA	Adgrl1 adhesion G protein-coupled receptor L1	PREDICTED: adhesion G protein-coupled receptor L1 isoform X1	adhesion G protein-coupled receptor L2 isoform X1	class B secretin-like G-protein coupled receptor GPRcir1, putative [Pediculus humanus corporis]
ENSMUSG00000013076	OMA03156	No	No	Yes	No	NA	No	No	NA	NA	NA	Amotl1 angiomotin-like 1	angiomotin like 1	angiomotin	NA
ENSMUSG00000013155	OMA15804	No	No	No	No	No	No	No	Yes	No	NA	Enkd1 enkurin domain containing 1	PREDICTED: enkurin domain-containing protein 1	enkurin domain-containing protein 1	RIKEN cDNA E130303B06, isoform CRA_c [Mus musculus]
ENSMUSG00000013236	OMA02325	No	No	No	No	NA	No	Act:-2.60	NA	NA	NA	Ptprs protein tyrosine phosphatase, receptor type, S	protein tyrosine phosphatase, receptor type S precursor	receptor-type tyrosine-protein phosphatase F	NA
ENSMUSG00000013418	OMA11991	Yes	No	No	No	NA	NA	NA	NA	NA	NA	B4galnt2 beta-1,4-N-acetyl-galactosaminyl transferase 2	PREDICTED: beta-1,4 N-acetylgalactosaminyltransferase 2	NA	NA
ENSMUSG00000013584	OMA02980	No	No	Yes	No	NA	NA	NA	Yes	No	NA	Aldh1a2 aldehyde dehydrogenase family 1, subfamily A2	retinal dehydrogenase 2	NA	aldehyde dehydrogenase class 1 [Xenopus laevis]
ENSMUSG00000013593	OMA03912	No	No	No	No	No	No	No	Yes	No	No	Ndufs2 NADH dehydrogenase (ubiquinone) Fe-S protein 2	NADH dehydrogenase	NADH dehydrogenase	NADH dehydrogenase (ubiquinone) Fe-S protein 2, 49kDa (NADH-coenzyme Q reductase) [Xenopus (Silurana) tropicalis]
ENSMUSG00000013629	OMA00165	No	No	No	No	No	No	No	Yes	No	No	Cad carbamoyl-phosphate synthetase 2, aspartate transcarbamylase, and dihydroorotase	PREDICTED: CAD protein	CAD protein	CAD protein [Danio rerio]
ENSMUSG00000013646	OMA10616	No	No	No	No	No	No	No	Yes	No	No	Sh3bp5l SH3 binding domain protein 5 like	SH3 domain-binding protein 5-like	uncharacterized protein LOC587527	AGAP011293-PA [Anopheles gambiae str. PEST]
ENSMUSG00000013787	OMA01611	No	No	No	No	No	No	Rep:0.71	NA	NA	NA	Ehmt2 euchromatic histone lysine N-methyltransferase 2	PREDICTED: histone-lysine N-methyltransferase EHMT2 isoform X1	histone-lysine N-methyltransferase EHMT2 isoform X2	NA
ENSMUSG00000013822	OMA17900	No	No	No	No	NA	No	Act:-0.98	No	No	NA	Elof1 ELF1 homolog, elongation factor 1	transcription elongation factor 1 homolog	transcription elongation factor 1 homolog	transcription elongation factor elf1 like protein [Coptotermes formosanus]
ENSMUSG00000013846	OMA13111	Yes	No	Yes	No	NA	No	No	NA	NA	NA	St3gal1 ST3 beta-galactoside alpha-2,3-sialyltransferase 1	CMP-N-acetylneuraminate-beta-galactosamide-alpha-2,3-sialyltransferase 1	uncharacterized protein LOC590209	NA
ENSMUSG00000014077	OMA11419	No	No	Yes	No	No	No	No	No	No	No	Chp1 calcineurin-like EF hand protein 1	calcineurin B homologous protein 1	calcineurin B homologous protein 1	Calcium-binding protein p22 [Harpegnathos saltator]
ENSMUSG00000014245	OMA15005	Yes	No	No	No	No	No	No	No	No	No	Pigl phosphatidylinositol glycan anchor biosynthesis, class L	PREDICTED: N-acetylglucosaminyl-phosphatidylinositol de-N-acetylase	N-acetylglucosaminyl-phosphatidylinositol de-N-acetylase	phosphatidylinositol glycan class L [Pyrenophora tritici-repentis Pt-1C-BFP]
ENSMUSG00000014294	OMA21680	No	No	No	No	NA	No	Act:-0.91	No	No	No	Ndufa2 NADH dehydrogenase (ubiquinone) 1 alpha subcomplex, 2	NADH dehydrogenase	NADH dehydrogenase	NADH-ubiquinone oxidoreductase complex [Bos taurus]
ENSMUSG00000014329	OMA01296	No	No	No	No	No	NA	NA	Yes	No	NA	Bicc1 BicC family RNA binding protein 1	PREDICTED: protein bicaudal C homolog 1	NA	protein bicaudal C homolog 1-B-like [Orbicella faveolata]
ENSMUSG00000014361	OMA03828	No	No	Yes	No	NA	NA	NA	NA	NA	NA	Mertk c-mer proto-oncogene tyrosine kinase	PREDICTED: tyrosine-protein kinase Mer isoform X1	NA	NA
ENSMUSG00000014402	OMA06386	No	No	No	No	Yes	NA	NA	No	No	No	Tsg101 tumor susceptibility gene 101	tumor susceptibility gene 101 protein	NA	tumor susceptibility gene 101 protein [Gallus gallus]
ENSMUSG00000014426	OMA00534	No	No	No	No	NA	No	Rep:0.80	NA	NA	No	Map3k4 mitogen-activated protein kinase kinase kinase 4	PREDICTED: mitogen-activated protein kinase kinase kinase 4 isoform X1	mitogen-activated protein kinase kinase kinase 4 isoform X2	NA
ENSMUSG00000014504	OMA18394	Yes	No	No	No	Yes	No	No	No	No	Yes	Srp19 signal recognition particle 19	signal recognition particle 19 kDa protein	signal recognition particle 19 kDa protein	signal recognition particle 19 kDa protein [Canis lupus familiaris]
ENSMUSG00000014542	OMA28479	Yes	No	NA	NA	No	NA	NA	NA	NA	NA	Clec4f C-type lectin domain family 4, member f	NA	NA	NA
ENSMUSG00000014592	OMA00449	Yes	No	No	No	NA	No	No	No	No	NA	Camta1 calmodulin binding transcription activator 1	PREDICTED: calmodulin-binding transcription activator 1	calmodulin-binding transcription activator 1-like	Calmodulin-binding transcription activator 1;
ENSMUSG00000014601	OMA01223	No	No	No	No	No	No	No	Yes	No	No	Strip1 striatin interacting protein 1	striatin-interacting protein 1	striatin-interacting protein 1 homolog isoform X1	striatin-interacting protein 1 homolog [Danio rerio]
ENSMUSG00000014747	OMA18752	No	No	No	Rep:1.12	NA	NA	NA	No	No	NA	Ankrd53 ankyrin repeat domain 53	PREDICTED: ankyrin repeat domain-containing protein 53	NA	Ankyrin repeat domain-containing protein 53 [Crassostrea gigas]
ENSMUSG00000014748	OMA11087	No	No	Yes	No	NA	No	No	No	No	No	Tex261 testis expressed gene 261	protein TEX261	protein TEX261	testis expressed 261 [Xenopus laevis]
ENSMUSG00000014763++	OMA10133	Yes	No	Yes	No	NA	No	No	NA	NA	NA	Fam120b family with sequence similarity 120, member B	constitutive coactivator of peroxisome proliferator-activated receptor gamma	constitutive coactivator of peroxisome proliferator-activated receptor gamma isoform X2	NA
ENSMUSG00000014769	OMA10763	No	No	Yes	No	NA	No	No	No	No	No	Psmb1 proteasome (prosome, macropain) subunit, beta type 1	proteasome subunit beta type-1	proteasome subunit beta type-1	Proteasome subunit beta type-1 [Fukomys damarensis]
ENSMUSG00000014773	OMA02526	No	Act:-2.95	Yes	No	NA	No	No	No	Act:-1.35	NA	Dll1 delta-like 1 (Drosophila)	delta-like protein 1 precursor	fibropellin-1-like	Sushi, von Willebrand factor type A, EGF and pentraxin domain-containing protein 1 [Chelonia mydas]
ENSMUSG00000014776	OMA27345	No	No	NA	NA	NA	No	Act:-0.69	NA	NA	NA	Nol3 nucleolar protein 3 (apoptosis repressor with CARD domain)	NA	Na(+)/H(+) exchange regulatory cofactor NHE-RF1 isoform X2	NA
ENSMUSG00000014782	OMA07076	No	No	Yes	No	Yes	Yes	No	NA	NA	NA	Plekhg4 pleckstrin homology domain containing, family G (with RhoGef domain) member 4	puratrophin-1	puratrophin-1	NA
ENSMUSG00000014786	OMA02640	No	No	No	No	NA	No	No	NA	NA	NA	Slc9a5 solute carrier family 9 (sodium/hydrogen exchanger), member 5	PREDICTED: sodium/hydrogen exchanger 5	probable Na(+)/H(+) antiporter nhx-9 isoform X3	NA
ENSMUSG00000014791	OMA05068	No	No	No	Rep:1.04	NA	NA	NA	NA	NA	NA	Elmo3 engulfment and cell motility 3	PREDICTED: engulfment and cell motility protein 3	NA	NA
ENSMUSG00000014846	OMA14873	No	No	No	No	No	No	Act:-0.44	No	No	NA	Tppp3 tubulin polymerization-promoting protein family member 3	tubulin polymerization-promoting protein family member 3	tubulin polymerization-promoting protein family member 2	tubulin polymerization promoting protein [Suberites domuncula]
ENSMUSG00000014850	OMA02487	No	No	No	Rep:1.11	NA	No	No	No	No	No	Msh3 mutS homolog 3	PREDICTED: DNA mismatch repair protein Msh3 isoform X1	DNA mismatch repair protein Msh3	DNA mismatch repair protein Msh3;
ENSMUSG00000014852	OMA03225	No	No	No	No	NA	Yes	No	NA	NA	NA	Adamts13 a disintegrin-like and metallopeptidase (reprolysin type) with thrombospondin type 1 motif, 13	PREDICTED: A disintegrin and metalloproteinase with thrombospondin motifs 13	A disintegrin and metalloproteinase with thrombospondin motifs 13	NA
ENSMUSG00000014859	OMA08736	No	No	No	No	No	No	Rep:1.18	No	No	NA	E2f4 E2F transcription factor 4	transcription factor E2F4	transcription factor E2F5	PREDICTED: transcription factor E2F5 isoform X1 [Bos taurus]
ENSMUSG00000014905	OMA12797	No	No	No	Act:-1.08	NA	NA	NA	NA	NA	No	Dnajb9 DnaJ heat shock protein family (Hsp40) member B9	dnaJ homolog subfamily B member 9 precursor	NA	NA
ENSMUSG00000014907	OMA14880	Yes	No	No	No	NA	No	Rep:0.61	No	No	No	Naf1 nuclear assembly factor 1 ribonucleoprotein	PREDICTED: H/ACA ribonucleoprotein complex non-core subunit NAF1	bromodomain-containing protein 4-like	H/ACA ribonucleoprotein complex non-core subunit NAF1;
ENSMUSG00000014956	OMA04582	Yes	No	Yes	No	No	No	Rep:0.48	No	No	NA	Ppp1cb protein phosphatase 1, catalytic subunit, beta isoform	serine/threonine-protein phosphatase PP1-beta catalytic subunit	serine/threonine-protein phosphatase PP1-beta catalytic subunit	Serine/threonine-protein phosphatase PP1-beta catalytic subunit;
ENSMUSG00000014980	OMA22764	No	No	No	No	NA	No	Rep:2.00	No	No	NA	Tsen15 tRNA splicing endonuclease subunit 15	tRNA-splicing endonuclease subunit Sen15	tRNA-splicing endonuclease subunit Sen15	tRNA-splicing endonuclease subunit Sen15 [Ophiophagus hannah]
ENSMUSG00000015013	OMA14242	No	No	No	Act:-1.00	No	No	No	No	No	No	Trappc2l trafficking protein particle complex 2-like	trafficking protein particle complex subunit 2-like protein	trafficking protein particle complex subunit 2-like protein	Trafficking protein particle complex subunit 2-like protein [Crassostrea gigas]
ENSMUSG00000015053	OMA04280	No	No	Yes	No	NA	NA	NA	NA	NA	NA	Gata2 GATA binding protein 2	PREDICTED: endothelial transcription factor GATA-2 isoform X1	NA	NA
ENSMUSG00000015112	OMA02022	No	No	Yes	No	No	No	No	No	No	No	Slc25a13 solute carrier family 25 (mitochondrial carrier, adenine nucleotide translocator), member 13	calcium-binding mitochondrial carrier protein Aralar2	calcium-binding mitochondrial carrier protein Aralar1 isoform X1	GA15263 [Drosophila pseudoobscura pseudoobscura]
ENSMUSG00000015120	OMA14046	No	No	No	No	No	No	Act:-1.90	No	No	No	Ube2i ubiquitin-conjugating enzyme E2I	SUMO-conjugating enzyme UBC9	SUMO-conjugating enzyme UBC9	ubiquitin-conjugating enzyme E2 c [Litopenaeus vannamei]
ENSMUSG00000015127	OMA06071	No	No	No	Rep:1.20	NA	NA	NA	NA	NA	NA	Unkl unkempt family like zinc finger	putative E3 ubiquitin-protein ligase UNKL	NA	NA
ENSMUSG00000015134	OMA04179	No	No	Yes	No	NA	NA	NA	NA	NA	NA	Aldh1a3 aldehyde dehydrogenase family 1, subfamily A3	PREDICTED: aldehyde dehydrogenase family 1 member A3	NA	NA
ENSMUSG00000015149	OMA08942	No	No	No	No	NA	No	No	No	No	Yes	Sirt2 sirtuin 2	PREDICTED: NAD-dependent protein deacetylase sirtuin-2 isoform X1	NAD-dependent protein deacetylase sirtuin-2 isoform X2	NAD-dependent protein deacetylase sirtuin-2 isoform 1 [Mus musculus]
ENSMUSG00000015176	OMA12616	No	No	No	Rep:1.22	No	No	No	No	No	NA	Nolc1 nucleolar and coiled-body phosphoprotein 1	nucleolar and coiled-body phosphoprotein 1	nucleolar and coiled-body phosphoprotein 1	Protein gar2;
ENSMUSG00000015189	OMA02320	No	No	No	No	No	No	Rep:0.85	No	No	No	Casd1 CAS1 domain containing 1	PREDICTED: CAS1 domain-containing protein 1 isoform X1	N-acetylneuraminate 9-O-acetyltransferase isoform X2	CAS1 domain-containing protein 1 [Crassostrea gigas]
ENSMUSG00000015202	OMA05923	Yes	No	No	No	NA	No	No	NA	NA	NA	Cnksr3 Cnksr family member 3	connector enhancer of kinase suppressor of ras 3	uncharacterized protein LOC580608 isoform X2	NA
ENSMUSG00000015222	OMA02352	Yes	No	No	No	NA	NA	NA	NA	NA	NA	Map2 microtubule-associated protein 2	PREDICTED: microtubule-associated protein 2 isoform X1	NA	NA
ENSMUSG00000015243	OMA00142	No	No	No	No	No	No	No	No	No	Yes	Abca1 ATP-binding cassette, sub-family A (ABC1), member 1	PREDICTED: ATP-binding cassette sub-family A member 1 isoform X1	phospholipid-transporting ATPase ABCA1 isoform X2	ABC transporter [Mus musculus]
ENSMUSG00000015290	OMA20968	No	No	Yes	No	NA	No	No	NA	NA	NA	Ubl4a ubiquitin-like 4A	ubiquitin-like protein 4A	ubiquitin-like protein 4A-A	NA
ENSMUSG00000015305	OMA03252	Yes	No	No	No	NA	No	No	NA	NA	NA	Sash1 SAM and SH3 domain containing 1	PREDICTED: SAM and SH3 domain-containing protein 1 isoform X1	SAM and SH3 domain-containing protein 1 isoform X3	NA
ENSMUSG00000015314	NA	Yes	No	NA	NA	NA	NA	NA	NA	NA	NA	Slamf6 SLAM family member 6	NA	NA	NA
ENSMUSG00000015340	OMA03451	No	No	No	No	No	No	Rep:1.04	No	No	Yes	Cybb cytochrome b-245, beta polypeptide	cytochrome b-245, beta polypeptide	NADPH oxidase	alphaintegrin3
ENSMUSG00000015354	OMA06357	No	No	No	No	Yes	NA	NA	Yes	No	NA	Pcolce2 procollagen C-endopeptidase enhancer 2	procollagen C-endopeptidase enhancer 2 precursor	NA	TPA: bone morphogenetic protein 1-like [Bos taurus]
ENSMUSG00000015396	NA	Yes	No	NA	NA	NA	NA	NA	NA	NA	NA	Cd83 CD83 antigen	NA	NA	NA
ENSMUSG00000015401	OMA19637	No	No	No	Act:-1.41	No	NA	NA	NA	NA	NA	Tmem27 transmembrane protein 27	PREDICTED: collectrin	NA	NA
ENSMUSG00000015405	OMA03810	No	No	No	Rep:2.79	NA	No	No	NA	NA	NA	Ace2 angiotensin I converting enzyme (peptidyl-dipeptidase A) 2	PREDICTED: angiotensin-converting enzyme 2	angiotensin-converting enzyme	NA
ENSMUSG00000015437	OMA21116	No	No	No	No	NA	NA	NA	No	Act:-1.10	NA	Gzmb granzyme B	granzyme H (cathepsin G-like 2, protein h-CCPX) precursor	NA	chymotrypsinogen 1 [Paralichthys olivaceus]
ENSMUSG00000015474	OMA12334	No	No	No	No	Yes	No	No	NA	NA	NA	Ppt2 palmitoyl-protein thioesterase 2	lysosomal thioesterase PPT2 precursor	lysosomal thioesterase PPT2-A isoform X1	NA
ENSMUSG00000015522	OMA02612	No	No	No	No	No	No	Rep:0.58	NA	NA	NA	Arnt aryl hydrocarbon receptor nuclear translocator	aryl hydrocarbon receptor nuclear translocator	aryl hydrocarbon receptor nuclear translocator 2 isoform X4	NA
ENSMUSG00000015542	OMA16761	No	No	No	No	Yes	No	No	No	No	No	Nat9 N-acetyltransferase 9 (GCN5-related, putative)	PREDICTED: N-acetyltransferase 9	N-acetyltransferase 9-like protein	N-acetyltransferase 9-like [Salmo salar]
ENSMUSG00000015568	OMA06212	No	No	No	Act:-1.15	NA	No	No	No	No	NA	Lpl lipoprotein lipase	PREDICTED: lipoprotein lipase	pancreatic triacylglycerol lipase	Pancreatic triacylglycerol lipase [Crassostrea gigas]
ENSMUSG00000015647	OMA00167	No	No	Yes	No	NA	No	Act:-0.67	No	No	NA	Lama5 laminin, alpha 5	PREDICTED: laminin subunit alpha-5 isoform X1	laminin subunit alpha isoform X1	alpha laminin
ENSMUSG00000015653	OMA04073	No	No	No	Rep:1.00	NA	NA	NA	NA	NA	No	Steap2 six transmembrane epithelial antigen of prostate 2	PREDICTED: metalloreductase STEAP2	NA	NA
ENSMUSG00000015656	OMA01450	No	No	No	No	Yes	No	No	Yes	No	Yes	Hspa8 heat shock protein 8	PREDICTED: heat shock cognate 71 kDa protein	heat shock cognate 71 kDa protein	PREDICTED: heat shock cognate 71 kDa protein [Chrysemys picta bellii]
ENSMUSG00000015668	OMA15252	No	No	No	No	No	No	Rep:0.64	NA	NA	NA	Pdzd11 PDZ domain containing 11	PDZ domain-containing protein 11	PDZ domain-containing protein 11	NA
ENSMUSG00000015709	OMA01785	No	No	No	No	No	No	Rep:0.58	No	No	No	Arnt2 aryl hydrocarbon receptor nuclear translocator 2	aryl hydrocarbon receptor nuclear translocator 2	aryl hydrocarbon receptor nuclear translocator 2 isoform X4	aryl hydrocarbon receptor nuclear translocator [Bos taurus]
ENSMUSG00000015733	OMA07042	Yes	No	No	No	No	No	Act:-0.47	No	No	No	Capza2 capping protein (actin filament) muscle Z-line, alpha 2	F-actin-capping protein subunit alpha-2	F-actin-capping protein subunit alpha	capping protein (actin filament) muscle Z-line, alpha 2 [Tetraodon nigroviridis]
ENSMUSG00000015748	OMA01887	No	No	Yes	No	NA	No	No	No	No	No	Prpf3 pre-mRNA processing factor 3	PREDICTED: U4/U6 small nuclear ribonucleoprotein Prp3	U4/U6 small nuclear ribonucleoprotein Prp3	U4/U6 small nuclear ribonucleoprotein Prp3 [Buceros rhinoceros silvestris]
ENSMUSG00000015750	OMA12065	No	No	Yes	No	No	No	No	Yes	No	No	Aph1a aph1 homolog A, gamma secretase subunit	gamma-secretase subunit APH-1A	gamma-secretase subunit Aph-1-like	Gamma-secretase subunit Aph-1 [Camponotus floridanus]
ENSMUSG00000015759	OMA12206	Yes	No	Yes	No	NA	No	Rep:0.53	No	No	NA	Cnih1 cornichon family AMPA receptor auxiliary protein 1	protein cornichon homolog 1	protein cornichon homolog 1	cornichon [Boltenia villosa]
ENSMUSG00000015766	OMA03327	No	No	No	No	No	No	Act:-0.70	No	No	NA	Eps8 epidermal growth factor receptor pathway substrate 8	epidermal growth factor receptor kinase substrate 8	epidermal growth factor receptor kinase substrate 8-like isoform X1	epidermal growth factor receptor pathway substrate 8 [Xenopus (Silurana) tropicalis]
ENSMUSG00000015776	OMA14755	No	No	No	No	No	No	Act:-0.72	No	No	No	Med22 mediator complex subunit 22	mediator of RNA polymerase II transcription subunit 22	mediator of RNA polymerase II transcription subunit 22	mediator of RNA polymerase II transcription subunit 22 [Gallus gallus]
ENSMUSG00000015812	OMA27068	No	No	No	Rep:2.42	NA	NA	NA	NA	NA	NA	Gnrh1 gonadotropin releasing hormone 1	progonadoliberin-1 precursor	NA	NA
ENSMUSG00000015829	OMA01219	No	Act:-5.30	No	No	No	NA	NA	NA	NA	NA	Tnr tenascin R	tenascin-R precursor	NA	NA
ENSMUSG00000015839	OMA09786	Yes	No	No	No	NA	NA	NA	NA	NA	NA	Nfe2l2 nuclear factor, erythroid derived 2, like 2	nuclear factor erythroid 2-related factor 2	NA	NA
ENSMUSG00000015846	OMA03697	No	No	No	No	No	Yes	No	NA	NA	NA	Rxra retinoid X receptor alpha	PREDICTED: retinoic acid receptor RXR-alpha isoform X1	retinoic acid receptor RXR isoform X2	NA
ENSMUSG00000015850	OMA05933	No	No	Yes	No	NA	NA	NA	NA	NA	NA	Adamtsl4 ADAMTS-like 4	PREDICTED: ADAMTS-like protein 4	NA	NA
ENSMUSG00000015879	OMA20949	Yes	No	No	No	NA	NA	NA	NA	NA	NA	Fam184b family with sequence similarity 184, member B	PREDICTED: protein FAM184B-like	NA	NA
ENSMUSG00000015880	OMA03068	No	No	No	No	No	No	No	No	No	Yes	Ncapg non-SMC condensin I complex, subunit G	condensin complex subunit 3	condensin complex subunit 3-like	Condensin complex subunit 3 [Crassostrea gigas]
ENSMUSG00000015889	OMA04796	No	No	No	No	NA	No	No	No	No	Yes	Lta4h leukotriene A4 hydrolase	leukotriene A-4 hydrolase	leukotriene A-4 hydrolase	aminopeptidase T [Sus scrofa]
ENSMUSG00000015943	OMA21613	No	No	Yes	No	NA	No	No	No	No	No	Bola1 bolA-like 1 (E. coli)	PREDICTED: bolA-like protein 1	bolA-like protein DDB_G0274169	bolA-like protein DDB_G0274169 [Exaiptasia pallida]
ENSMUSG00000015944	OMA06195	No	Rep:1.27	No	No	NA	No	Rep:1.27	No	No	No	Gatsl2 GATS protein-like 2	cytosolic arginine sensor for mTORC1 subunit 2	cytosolic arginine sensor for mTORC1 subunit 2	PREDICTED: GATS-like protein 3 isoform X1 [Heterocephalus glaber]
ENSMUSG00000015957	OMA06780	No	No	No	No	No	NA	NA	Yes	No	NA	Wnt11 wingless-type MMTV integration site family, member 11	protein Wnt-11 precursor	NA	NvWnt11
ENSMUSG00000015961	OMA04600	Yes	No	No	No	NA	NA	NA	No	No	NA	Adss adenylosuccinate synthetase, non muscle	adenylosuccinate synthetase isozyme 2	NA	Adenylosuccinate synthetase isozyme 2 {ECO:0000255|HAMAP-Rule:MF_03127};
ENSMUSG00000015962	NA	No	No	NA	NA	NA	NA	NA	NA	NA	NA	1700016C15Rik RIKEN cDNA 1700016C15 gene	NA	NA	NA
ENSMUSG00000015970	OMA05532	No	No	NA	NA	Yes	No	No	No	No	No	Chdh choline dehydrogenase	NA	choline dehydrogenase, mitochondrial	Choline dehydrogenase, mitochondrial [Columba livia]
ENSMUSG00000015981	OMA05555	No	No	No	No	NA	No	No	NA	NA	Yes	Stk32c serine/threonine kinase 32C	PREDICTED: serine/threonine-protein kinase 32C	serine/threonine-protein kinase 32B isoform X1	NA
ENSMUSG00000015994	OMA07937	No	No	No	No	No	No	No	Yes	No	No	Fnta farnesyltransferase, CAAX box, alpha	protein farnesyltransferase/geranylgeranyltransferase type-1 subunit alpha	protein farnesyltransferase/geranylgeranyltransferase type-1 subunit alpha	farnesyltransferase, CAAX box, alpha [Xenopus (Silurana) tropicalis]
ENSMUSG00000016024	OMA13409	No	No	No	No	No	No	No	No	Act:-1.03	No	Lbp lipopolysaccharide binding protein	bactericidal/permeability-increasing protein precursor	bactericidal permeability-increasing protein-like	Lipopolysaccharide-binding protein;
ENSMUSG00000016028	OMA00118	No	No	Yes	No	No	No	No	NA	NA	NA	Celsr1 cadherin, EGF LAG seven-pass G-type receptor 1	PREDICTED: cadherin EGF LAG seven-pass G-type receptor 1 isoform X1	cadherin EGF LAG seven-pass G-type receptor 2-like	NA
ENSMUSG00000016128	OMA01508	No	No	Yes	No	NA	No	Act:-0.78	NA	NA	NA	Stard13 StAR-related lipid transfer (START) domain containing 13	stAR-related lipid transfer protein 13	rho GTPase-activating protein 7 isoform X3	NA
ENSMUSG00000016150	OMA00081	No	No	No	No	NA	No	Rep:0.70	NA	NA	NA	Tenm1 teneurin transmembrane protein 1	PREDICTED: teneurin-1	teneurin-3 isoform X3	NA
ENSMUSG00000016253	OMA02167	No	No	No	No	No	No	Act:-0.69	NA	NA	No	Nelfcd negative elongation factor complex member C/D, Th1l	PREDICTED: negative elongation factor C/D	negative elongation factor D isoform X2	NA
ENSMUSG00000016255	NA	Yes	No	NA	NA	NA	NA	NA	NA	NA	NA	Tubb1 tubulin, beta 1 class VI	NA	NA	NA
ENSMUSG00000016256	OMA10386	No	No	No	No	NA	No	No	No	No	Yes	Ctsz cathepsin Z	cathepsin Z precursor	cathepsin Z	Cathepsin Z precursor [Osmerus mordax]
ENSMUSG00000016319	OMA06598	No	No	No	No	Yes	No	No	No	No	Yes	Slc25a5 solute carrier family 25 (mitochondrial carrier, adenine nucleotide translocator), member 5	ADP/ATP translocase 2	ADP,ATP carrier protein	ADP,ATP carrier protein [Crassostrea gigas]
ENSMUSG00000016349	OMA02725	No	No	No	No	No	No	Act:-0.66	Yes	No	Yes	Eef1a2 eukaryotic translation elongation factor 1 alpha 2	elongation factor Tu, mitochondrial	elongation factor 1 alpha	elongation factor 1-alpha [Pocillopora damicornis]
ENSMUSG00000016382	OMA02143	No	No	No	No	NA	No	Act:-0.51	No	No	Yes	Pls3 plastin 3 (T-isoform)	plastin-3	plastin-3	fimbrin [Capsaspora owczarzaki ATCC 30864]
ENSMUSG00000016386	OMA05734	Yes	No	No	No	NA	No	No	No	No	No	Mpped2 metallophosphoesterase domain containing 2	metallophosphoesterase MPPED2	metallophosphoesterase MPPED2 isoform X2	metallophosphoesterase domain-containing protein 1 [Salpingoeca rosetta]
ENSMUSG00000016477	OMA07928	No	No	Yes	No	No	No	No	NA	NA	No	E2f3 E2F transcription factor 3	transcription factor E2F3	E2F transcription factor 3	NA
ENSMUSG00000016487	OMA02883	Yes	No	No	No	Yes	NA	NA	No	No	NA	Ppfibp1 PTPRF interacting protein, binding protein 1 (liprin beta 1)	PREDICTED: liprin-beta-1, partial	NA	Liprin-beta-1 [Myotis davidii]
ENSMUSG00000016496	OMA22117	No	No	No	Rep:1.32	NA	NA	NA	NA	NA	NA	Cd274 CD274 antigen	PREDICTED: programmed cell death 1 ligand 1	NA	NA
ENSMUSG00000016526	OMA05569	No	No	Yes	No	NA	NA	NA	NA	NA	NA	Dyrk3 dual-specificity tyrosine-(Y)-phosphorylation regulated kinase 3	dual specificity tyrosine-phosphorylation-regulated kinase 3	NA	NA
ENSMUSG00000016552	OMA05143	No	No	Yes	No	No	No	No	No	No	NA	Foxred2 FAD-dependent oxidoreductase domain containing 2	FAD-dependent oxidoreductase domain-containing protein 2 precursor	FAD-dependent oxidoreductase domain-containing protein 2-like	PREDICTED: FAD-dependent oxidoreductase domain-containing protein 2 [Columba livia]
ENSMUSG00000016619	OMA10561	No	No	No	No	No	No	Act:-0.66	No	No	NA	Nup50 nucleoporin 50	nuclear pore complex protein Nup50	nuclear pore complex protein Nup50	nuclear pore complex protein Nup50 [Macaca mulatta]
ENSMUSG00000016664	OMA04330	Yes	No	No	No	Yes	No	No	Yes	No	No	Pacsin2 protein kinase C and casein kinase substrate in neurons 2	protein kinase C and casein kinase substrate in neurons protein 2	protein kinase C and casein kinase substrate in neurons protein 1 isoform X3	Protein kinase C and casein kinase substrate in neurons protein 2 [Acromyrmex echinatior]
ENSMUSG00000016918	OMA01560	Yes	No	Yes	No	NA	NA	NA	NA	NA	NA	Sulf1 sulfatase 1	extracellular sulfatase Sulf-1 precursor	NA	NA
ENSMUSG00000016921	OMA09897	No	No	No	No	NA	NA	NA	No	Act:-1.04	NA	Srsf6 serine/arginine-rich splicing factor 6	arginine/serine-rich splicing factor 4 isoform 1	NA	hnRNP protein [Chironomus tentans]
ENSMUSG00000016942	OMA04868	No	No	No	No	Yes	No	No	NA	NA	NA	Tmprss6 transmembrane serine protease 6	PREDICTED: transmembrane protease serine 6 isoform X1	probable threonine protease PRSS50 isoform X1	NA
ENSMUSG00000016995	OMA05566	No	No	Yes	No	No	NA	NA	No	No	NA	Matn4 matrilin 4	PREDICTED: matrilin-4 isoform X1	NA	Collagen alpha-1(XX) chain;
ENSMUSG00000017049	OMA24201	No	No	NA	NA	NA	NA	NA	No	Rep:3.07	NA	Ccdc70 coiled-coil domain containing 70	NA	NA	Actin cytoskeleton-regulatory complex protein sla1;
ENSMUSG00000017119	OMA06768	No	No	No	No	NA	No	Rep:0.45	NA	NA	NA	Nbr1 neighbor of Brca1 gene 1	PREDICTED: next to BRCA1 gene 1 protein isoform X1	next to BRCA1 gene 1 protein	NA
ENSMUSG00000017167	OMA01950	No	No	No	No	NA	NA	NA	Yes	Rep:1.16	NA	Cntnap1 contactin associated protein-like 1	contactin-associated protein 1 precursor	NA	contactin-associated protein-like 2 precursor [Pongo abelii]
ENSMUSG00000017221	OMA03419	No	No	No	No	Yes	No	No	No	Rep:2.29	Yes	Psmd3 proteasome (prosome, macropain) 26S subunit, non-ATPase, 3	PREDICTED: 26S proteasome non-ATPase regulatory subunit 3	26S proteasome non-ATPase regulatory subunit 3 isoform X2	26S proteasome non-ATPase regulatory subunit 3-like protein [Callorhinchus milii]
ENSMUSG00000017288	OMA01144	No	No	No	Act:-1.03	No	No	No	No	No	No	Vps53 VPS53 GARP complex subunit	PREDICTED: vacuolar protein sorting-associated protein 53 homolog	vacuolar protein sorting-associated protein 53 homolog	vacuolar protein sorting-associated protein 53 homolog [Gallus gallus]
ENSMUSG00000017291	OMA00514	No	No	No	No	Yes	No	Rep:0.71	No	No	NA	Taok1 TAO kinase 1	serine/threonine-protein kinase TAO1	serine/threonine-protein kinase TAO1	Serine/threonine-protein kinase TAO1 [Zootermopsis nevadensis]
ENSMUSG00000017299	OMA15844	Yes	No	No	No	NA	No	No	NA	NA	NA	Dnttip1 deoxynucleotidyltransferase, terminal, interacting protein 1	deoxynucleotidyltransferase terminal-interacting protein 1	deoxynucleotidyltransferase terminal-interacting protein 1	NA
ENSMUSG00000017300	OMA13219	No	No	No	Act:-1.60	NA	NA	NA	NA	NA	NA	Tnnc2 troponin C2, fast	troponin C, skeletal muscle	NA	NA
ENSMUSG00000017376	OMA02250	Yes	No	No	No	No	No	No	Yes	No	NA	Nlk nemo like kinase	serine/threonine-protein kinase NLK	serine/threonine-protein kinase NLK isoform X2	nemo-like kinase 2 [Danio rerio]
ENSMUSG00000017386	OMA04689	No	No	Yes	No	Yes	No	No	NA	NA	NA	Traf4 TNF receptor associated factor 4	TNF receptor-associated factor 4	TNF receptor-associated factor 4-like	NA
ENSMUSG00000017390	OMA06342	No	No	No	No	Yes	NA	NA	NA	NA	NA	Aldoc aldolase C, fructose-bisphosphate	fructose-bisphosphate aldolase C	NA	NA
ENSMUSG00000017404	OMA09567	No	No	No	No	NA	No	Act:-1.07	No	No	No	Rpl19 ribosomal protein L19	60S ribosomal protein L19	60S ribosomal protein L19	ribosomal protein L19e [Coptotermes formosanus]
ENSMUSG00000017405	OMA02842	No	No	Yes	No	NA	No	No	No	No	NA	Nek8 NIMA (never in mitosis gene a)-related expressed kinase 8	serine/threonine-protein kinase Nek8	serine/threonine-protein kinase Nek8	Serine/threonine-protein kinase Nek8;
ENSMUSG00000017412	OMA02733	Yes	No	Yes	No	NA	No	No	No	No	NA	Cacnb4 calcium channel, voltage-dependent, beta 4 subunit	voltage-dependent L-type calcium channel subunit beta-4	voltage-dependent L-type calcium channel subunit beta-1, partial	NveCa-beta
ENSMUSG00000017417	OMA08466	No	Act:-7.82	No	No	NA	No	Act:-0.74	NA	NA	NA	Plxdc1 plexin domain containing 1	PREDICTED: plexin domain-containing protein 1 isoform X1	plexin domain-containing protein 2	NA
ENSMUSG00000017418	OMA11008	No	No	No	No	NA	No	Act:-1.06	No	No	No	Arl5b ADP-ribosylation factor-like 5B	ADP-ribosylation factor-like protein 5B	ADP-ribosylation factor-like protein 5B	ADP-ribosylation factor-like protein 5B [Zootermopsis nevadensis]
ENSMUSG00000017428	OMA03785	No	No	No	No	No	No	Act:-1.01	No	No	No	Psmd11 proteasome (prosome, macropain) 26S subunit, non-ATPase, 11	PREDICTED: 26S proteasome non-ATPase regulatory subunit 11 isoform X1	26S proteasome non-ATPase regulatory subunit 11-like	PREDICTED: 26S proteasome non-ATPase regulatory subunit 11 [Xenopus (Silurana) tropicalis]
ENSMUSG00000017446	OMA15140	Yes	No	No	No	NA	No	Act:-0.63	NA	NA	NA	C1qtnf1 C1q and tumor necrosis factor related protein 1	complement C1q tumor necrosis factor-related protein 8 precursor	uncharacterized protein LOC577782	NA
ENSMUSG00000017453	OMA11268	No	No	No	No	NA	No	No	No	Rep:1.08	No	Pipox pipecolic acid oxidase	peroxisomal sarcosine oxidase	LOW QUALITY PROTEIN: peroxisomal sarcosine oxidase	L-pipecolic acid oxidase [Homo sapiens]
ENSMUSG00000017485	OMA00325	No	No	No	No	No	No	Rep:0.97	No	No	No	Top2b topoisomerase (DNA) II beta	PREDICTED: DNA topoisomerase 2-beta isoform X1	DNA topoisomerase 2-alpha	topoisomerase (DNA) II alpha 170kDa [Xenopus laevis]
ENSMUSG00000017491	OMA03727	No	No	Yes	No	Yes	No	No	NA	NA	NA	Rarb retinoic acid receptor, beta	PREDICTED: retinoic acid receptor beta	retinoic acid receptor alpha-A	NA
ENSMUSG00000017493	OMA15037	No	No	No	Act:-2.23	NA	NA	NA	NA	NA	NA	Igfbp4 insulin-like growth factor binding protein 4	PREDICTED: insulin-like growth factor-binding protein 4	NA	NA
ENSMUSG00000017499	OMA07379	No	No	No	No	NA	No	Rep:0.91	No	No	No	Cdc6 cell division cycle 6	cell division control protein 6 homolog	cell division control protein 6	cell division control protein 6 homolog [Homo sapiens]
ENSMUSG00000017588	OMA12776	No	No	No	Act:-2.14	NA	NA	NA	NA	NA	NA	Krt27 keratin 27	PREDICTED: keratin, type I cytoskeletal 12	NA	NA
ENSMUSG00000017607	OMA15575	No	No	NA	NA	Yes	No	No	NA	NA	NA	Tns4 tensin 4	NA	tensin-1-like isoform X2	NA
ENSMUSG00000017631	OMA01200	Yes	No	No	Rep:1.41	NA	No	No	NA	NA	NA	Abr active BCR-related gene	active breakpoint cluster region-related protein	active breakpoint cluster region-related protein isoform X1	NA
ENSMUSG00000017664	OMA14790	No	No	NA	NA	No	No	No	No	No	Yes	Slc35c2 solute carrier family 35, member C2	NA	solute carrier family 35 member C2	solute carrier family 35 (GDP-fucose transporter), member C2 [Xenopus laevis]
ENSMUSG00000017670	OMA01541	No	No	Yes	No	NA	NA	NA	NA	NA	NA	Elmo2 engulfment and cell motility 2	engulfment and cell motility protein 2	NA	NA
ENSMUSG00000017677	OMA05682	Yes	No	No	No	No	No	No	NA	NA	NA	Wsb1 WD repeat and SOCS box-containing 1	WD repeat and SOCS box-containing protein 1	WD repeat and SOCS box-containing protein 1	NA
ENSMUSG00000017686	OMA02112	Yes	No	No	No	No	No	No	No	No	No	Rhot1 ras homolog family member T1	PREDICTED: mitochondrial Rho GTPase 1 isoform X1	mitochondrial Rho GTPase 1-A	mitochondrial Rho GTPase 1-A [Danio rerio]
ENSMUSG00000017688	OMA04842	Yes	No	No	Act:-1.93	NA	No	No	NA	NA	NA	Hnf4g hepatocyte nuclear factor 4, gamma	PREDICTED: hepatocyte nuclear factor 4-gamma isoform X1	hepatocyte nuclear factor 4-gamma isoform X2	NA
ENSMUSG00000017692	OMA17809	No	No	No	Rep:1.17	NA	NA	NA	NA	NA	NA	Rhbdl3 rhomboid, veinlet-like 3 (Drosophila)	PREDICTED: rhomboid-related protein 3-like	NA	NA
ENSMUSG00000017697	OMA08872	Yes	No	No	No	Yes	No	No	No	No	No	Ada adenosine deaminase	adenosine deaminase	LOW QUALITY PROTEIN: adenosine deaminase	adenosine deaminase [Danio rerio]
ENSMUSG00000017707	OMA07585	No	No	No	No	NA	No	Act:-0.65	Yes	No	NA	Serinc3 serine incorporator 3	serine incorporator 3 precursor	probable serine incorporator isoform X1	Serine incorporator 1 [Harpegnathos saltator]
ENSMUSG00000017715	OMA05725	No	No	No	No	No	No	No	No	No	Yes	Pgs1 phosphatidylglycerophosphate synthase 1	CDP-diacylglycerol--glycerol-3-phosphate 3-phosphatidyltransferase, mitochondrial precursor	CDP-diacylglycerol--glycerol-3-phosphate 3-phosphatidyltransferase, mitochondrial	CDP-diacylglycerol--glycerol-3-phosphate 3-phosphatidyltransferase, mitochondrial [Dicentrarchus labrax]
ENSMUSG00000017721	OMA04510	Yes	No	No	No	No	No	No	No	No	Yes	Pigt phosphatidylinositol glycan anchor biosynthesis, class T	GPI transamidase component PIG-T precursor	GPI transamidase component PIG-T	GPI transamidase component PIG-T [Zootermopsis nevadensis]
ENSMUSG00000017733	OMA27900	No	No	NA	NA	Yes	NA	NA	NA	NA	NA	Eppin epididymal peptidase inhibitor	NA	NA	NA
ENSMUSG00000017734	OMA26987	No	No	No	Act:-1.55	NA	NA	NA	NA	NA	NA	Dbndd2 dysbindin (dystrobrevin binding protein 1) domain containing 2	PREDICTED: dysbindin domain-containing protein 2-like	NA	NA
ENSMUSG00000017740	OMA00609	No	No	No	No	No	No	Rep:0.82	No	No	No	Slc12a5 solute carrier family 12, member 5	solute carrier family 12 member 5	solute carrier family 12 member 4	Solute carrier family 12 member 7 [Cricetulus griseus]
ENSMUSG00000017754	OMA08592	Yes	Rep:1.99	No	No	Yes	NA	NA	NA	NA	NA	Pltp phospholipid transfer protein	phospholipid transfer protein precursor	NA	NA
ENSMUSG00000017774	OMA01020	No	No	Yes	No	Yes	NA	NA	NA	NA	NA	Myo1c myosin IC	PREDICTED: unconventional myosin-Ic isoform X1	NA	NA
ENSMUSG00000017776	OMA12808	No	No	No	No	NA	No	Rep:0.52	No	No	NA	Crk v-crk avian sarcoma virus CT10 oncogene homolog	adapter molecule crk	crk-like protein isoform X3	v-crk avian sarcoma virus CT10 oncogene homolog-like [Xenopus laevis]
ENSMUSG00000017778	NA	Yes	No	NA	NA	NA	NA	NA	NA	NA	NA	Cox7c cytochrome c oxidase subunit VIIc	NA	NA	NA
ENSMUSG00000017781	OMA08141	No	No	No	No	NA	No	No	No	No	Yes	Pitpna phosphatidylinositol transfer protein, alpha	phosphatidylinositol transfer protein alpha isoform	phosphatidylinositol transfer protein alpha isoform	phosphatidylinositol transfer protein/retinal degeneration b protein [Capsaspora owczarzaki ATCC 30864]
ENSMUSG00000017801	OMA11997	No	No	Yes	No	No	No	No	No	No	No	Mlx MAX-like protein X	PREDICTED: max-like protein X isoform X1	max-like protein X	Williams-Beuren syndrome chromosomal region 14 protein [Tupaia chinensis]
ENSMUSG00000017817	OMA05209	Yes	No	Yes	No	NA	No	No	NA	NA	NA	Jph2 junctophilin 2	PREDICTED: junctophilin-2	junctophilin-1	NA
ENSMUSG00000017830	OMA08099	No	No	No	No	NA	No	No	No	Act:-1.25	NA	Dhx58 DEXH (Asp-Glu-X-His) box polypeptide 58	PREDICTED: probable ATP-dependent RNA helicase DHX58 isoform X1	probable ATP-dependent RNA helicase DDX58, partial	Chain A, Structural Basis For Dsrna Duplex Backbone Recognition By Mda5
ENSMUSG00000017897	OMA04320	No	No	Yes	No	NA	NA	NA	NA	NA	NA	Eya2 EYA transcriptional coactivator and phosphatase 2	eyes absent homolog 2	NA	NA
ENSMUSG00000017929	OMA06036	Yes	No	No	No	No	No	No	No	No	No	B4galt5 UDP-Gal:betaGlcNAc beta 1,4-galactosyltransferase, polypeptide 5	beta-1,4-galactosyltransferase 5	uncharacterized protein LOC583786	Beta-1,4-N-acetylgalactosaminyltransferase bre-4 [Cerapachys biroi]
ENSMUSG00000017950	OMA04421	No	No	No	Act:-1.22	Yes	No	No	No	No	NA	Hnf4a hepatic nuclear factor 4, alpha	PREDICTED: hepatocyte nuclear factor 4-alpha isoform X1	hepatocyte nuclear factor 4-gamma isoform X2	Hepatocyte nuclear factor 4, partial [Nematostella vectensis]
ENSMUSG00000017969	OMA09595	No	No	No	Act:-1.55	No	NA	NA	NA	NA	NA	Ptgis prostaglandin I2 (prostacyclin) synthase	PREDICTED: prostacyclin synthase isoform X1	NA	NA
ENSMUSG00000017978++	OMA00502	Yes	No	Yes	No	NA	No	No	NA	NA	NA	Cadps2 Ca2+-dependent activator protein for secretion 2	PREDICTED: calcium-dependent secretion activator 2 isoform X1	calcium-dependent secretion activator 1 isoform X1	NA
ENSMUSG00000017999	OMA02630	No	No	No	No	No	No	Act:-0.95	No	No	Yes	Ddx27 DEAD (Asp-Glu-Ala-Asp) box polypeptide 27	PREDICTED: probable ATP-dependent RNA helicase DDX27	probable ATP-dependent RNA helicase DDX27	RNA helicase-like protein [Homo sapiens]
ENSMUSG00000018001	OMA03876	No	No	No	No	No	No	No	No	No	Yes	Cyth3 cytohesin 3	cytohesin-3	cytohesin-1 isoform X2	Cytohesin-1 [Zootermopsis nevadensis]
ENSMUSG00000018042	OMA12362	Yes	No	No	No	No	No	No	No	No	Yes	Cyb5r3 cytochrome b5 reductase 3	cytochrome b5 reductase 3	NADH-cytochrome b5 reductase 3-like isoform X2	diaphorase [Capsaspora owczarzaki ATCC 30864]
ENSMUSG00000018076	OMA00379	Yes	No	Yes	No	NA	No	No	NA	NA	NA	Med13l mediator complex subunit 13-like	PREDICTED: mediator of RNA polymerase II transcription subunit 13-like isoform X1	mediator of RNA polymerase II transcription subunit 13 isoform X3	NA
ENSMUSG00000018143	OMA13211	No	No	No	No	Yes	NA	NA	No	Rep:1.37	NA	Mafk v-maf musculoaponeurotic fibrosarcoma oncogene family, protein K (avian)	transcription factor MafK	NA	transcription factor MafK [Bos taurus]
ENSMUSG00000018160	OMA00585	No	No	No	No	NA	No	Rep:0.55	NA	NA	NA	Med1 mediator complex subunit 1	mediator of RNA polymerase II transcription subunit 1	mediator of RNA polymerase II transcription subunit 1	NA
ENSMUSG00000018166	OMA01807	No	No	No	No	NA	No	Rep:0.51	NA	NA	NA	Erbb3 erb-b2 receptor tyrosine kinase 3	PREDICTED: receptor tyrosine-protein kinase erbB-3	receptor tyrosine-protein kinase erbB-4 isoform X2	NA
ENSMUSG00000018171	OMA05874	No	No	No	No	No	No	No	No	No	Yes	Vmp1 vacuole membrane protein 1	vacuole membrane protein 1	vacuole membrane protein 1	vacuole membrane protein, putative [Ixodes scapularis]
ENSMUSG00000018196	OMA22372	No	No	No	No	Yes	No	No	No	No	No	Glrx2 glutaredoxin 2 (thioltransferase)	glutaredoxin 2	glutaredoxin-1	glutaredoxin, putative [Perkinsus marinus ATCC 50983]
ENSMUSG00000018238	OMA13727	No	No	Yes	No	NA	NA	NA	NA	NA	NA	Gdf9 growth differentiation factor 9	PREDICTED: growth/differentiation factor 9	NA	NA
ENSMUSG00000018239	OMA17378	No	No	Yes	No	NA	No	No	No	No	NA	Zcchc10 zinc finger, CCHC domain containing 10	zinc finger CCHC domain-containing protein 10	uncharacterized protein DDB_G0271670-like, partial	Craniofacial development protein 2;
ENSMUSG00000018286	OMA11566	No	No	No	No	No	No	Act:-1.46	No	No	No	Psmb6 proteasome (prosome, macropain) subunit, beta type 6	proteasome subunit beta type-6	proteasome subunit beta type-6	proteasome subunit Y [Lethenteron camtschaticum]
ENSMUSG00000018287	OMA18666	No	No	NA	NA	NA	No	No	NA	NA	Yes	Spag7 sperm associated antigen 7	NA	sperm-associated antigen 7-like	NA
ENSMUSG00000018334	OMA02417	No	No	No	No	No	No	Rep:0.85	NA	NA	NA	Ksr1 kinase suppressor of ras 1	kinase suppressor of Ras 1	kinase suppressor of Ras 2-like isoform X1	NA
ENSMUSG00000018340	OMA03089	No	No	No	No	NA	No	Rep:0.53	No	No	Yes	Anxa6 annexin A6	PREDICTED: annexin A6	uncharacterized protein LOC587473 isoform X1	Annexin A7 [Crassostrea gigas]
ENSMUSG00000018341	OMA16553	No	No	No	Rep:1.47	NA	NA	NA	NA	NA	NA	Il12rb2 interleukin 12 receptor, beta 2	PREDICTED: interleukin-12 receptor subunit beta-2	NA	NA
ENSMUSG00000018347	OMA26805	Yes	No	NA	NA	No	NA	NA	NA	NA	NA	Zkscan6 zinc finger with KRAB and SCAN domains 6	NA	NA	NA
ENSMUSG00000018363	OMA02226	No	No	No	No	Yes	No	Rep:0.65	NA	NA	NA	Smurf2 SMAD specific E3 ubiquitin protein ligase 2	PREDICTED: E3 ubiquitin-protein ligase SMURF2 isoform X1	E3 ubiquitin-protein ligase SMURF2-like	NA
ENSMUSG00000018377	OMA04089	No	No	Yes	No	NA	NA	NA	NA	NA	NA	Vezf1 vascular endothelial zinc finger 1	vascular endothelial zinc finger 1	NA	NA
ENSMUSG00000018378	OMA09766	No	No	No	No	No	No	No	Yes	No	NA	Cuedc1 CUE domain containing 1	CUE domain-containing protein 1	protein EARLY FLOWERING 5 isoform X1	CUE domain-containing protein 1 [Nipponia nippon]
ENSMUSG00000018379	OMA07459	No	No	No	No	Yes	No	No	No	No	NA	Srsf1 serine/arginine-rich splicing factor 1	serine/arginine-rich splicing factor 1	serine/arginine-rich splicing factor 1	RecName: Full=Serine/arginine-rich splicing factor 1; AltName: Full=Splicing factor, arginine/serine-rich 1 [Gallus gallus]
ENSMUSG00000018387	OMA26452	No	No	NA	NA	Yes	NA	NA	NA	NA	NA	Shroom1 shroom family member 1	NA	NA	NA
ENSMUSG00000018412	OMA09442	No	No	No	No	Yes	NA	NA	No	No	NA	Kansl1 KAT8 regulatory NSL complex subunit 1	PREDICTED: KAT8 regulatory NSL complex subunit 1	NA	KAT8 regulatory NSL complex subunit 1;
ENSMUSG00000018417	OMA02381	No	No	Yes	No	NA	No	No	No	No	NA	Myo1b myosin IB	unconventional myosin-Ia	unconventional myosin-Ia	Myosin-Ib [Crassostrea gigas]
ENSMUSG00000018427	OMA13790	No	No	Yes	No	Yes	No	No	Yes	No	No	Ypel2 yippee-like 2 (Drosophila)	protein yippee-like 2	protein yippee-like 2	Protein yippee-like protein [Cerapachys biroi]
ENSMUSG00000018428	OMA08295	No	No	No	No	No	No	No	No	Rep:2.30	NA	Akap1 A kinase (PRKA) anchor protein 1	PREDICTED: A-kinase anchor protein 1, mitochondrial isoform X1	A-kinase anchor protein 1, mitochondrial	A kinase anchor protein 1, mitochondrial [Crassostrea gigas]
ENSMUSG00000018442	OMA08721	No	No	No	No	NA	No	No	Yes	No	No	Derl2 Der1-like domain family, member 2	derlin-2	derlin-2	derlin 2 [Xenopus (Silurana) tropicalis]
ENSMUSG00000018459	OMA09474	No	Act:-7.92	No	No	No	No	No	NA	NA	NA	Slc13a3 solute carrier family 13 (sodium-dependent dicarboxylate transporter), member 3	solute carrier family 13 member 3	solute carrier family 13 member 3-like	NA
ENSMUSG00000018474	OMA00233	No	No	No	No	NA	No	Rep:1.28	NA	NA	NA	Chd3 chromodomain helicase DNA binding protein 3	PREDICTED: chromodomain-helicase-DNA-binding protein 3	chromodomain-helicase-DNA-binding protein Mi-2 homolog isoform X5	NA
ENSMUSG00000018481	OMA02059	No	No	No	No	NA	No	Act:-1.52	No	No	No	Appbp2 amyloid beta precursor protein (cytoplasmic tail) binding protein 2	PREDICTED: amyloid protein-binding protein 2	amyloid protein-binding protein 2	amyloid protein-binding protein 2 [Danio rerio]
ENSMUSG00000018500	OMA11334	Yes	No	No	Rep:1.18	Yes	NA	NA	NA	NA	NA	Adora2b adenosine A2b receptor	PREDICTED: adenosine receptor A2b	NA	NA
ENSMUSG00000018509	OMA14607	No	No	No	No	NA	No	No	No	Act:-1.37	NA	Cenpv centromere protein V	centromere protein V	centromere protein V	Centromere protein V [Chelonia mydas]
ENSMUSG00000018543	OMA21385	No	No	No	Act:-1.68	NA	No	No	NA	NA	NA	1700001P01Rik RIKEN cDNA 1700001P01 gene	PREDICTED: uncharacterized protein C17orf98-like isoform X1	uncharacterized protein LOC755292	NA
ENSMUSG00000018547	OMA04159	No	No	No	No	Yes	No	Act:-0.98	No	No	No	Pip4k2b phosphatidylinositol-5-phosphate 4-kinase, type II, beta	PREDICTED: phosphatidylinositol 5-phosphate 4-kinase type-2 beta	phosphatidylinositol 5-phosphate 4-kinase type-2 alpha-like	Phosphatidylinositol-5-phosphate 4-kinase type-2 beta [Harpegnathos saltator]
ENSMUSG00000018581	OMA00048	Yes	No	No	No	NA	NA	NA	NA	NA	NA	Dnah11 dynein, axonemal, heavy chain 11	PREDICTED: dynein heavy chain 11, axonemal	NA	NA
ENSMUSG00000018593	OMA08242	No	No	No	No	Yes	NA	NA	NA	NA	NA	Sparc secreted acidic cysteine rich glycoprotein	SPARC precursor	NA	NA
ENSMUSG00000018604	OMA03175	No	No	Yes	No	NA	Yes	Act:-0.85	Yes	No	NA	Tbx3 T-box 3	T-box transcription factor TBX3	T-box 2/3 protein	Tbx2/3
ENSMUSG00000018620	OMA06766	No	No	No	No	NA	No	Rep:1.47	No	No	NA	Mmp20 matrix metallopeptidase 20 (enamelysin)	PREDICTED: matrix metalloproteinase-20	matrix metalloproteinase 14 precursor	Stromelysin-2 [Pteropus alecto]
ENSMUSG00000018623	OMA18998	Yes	No	Yes	No	NA	No	Rep:0.85	NA	NA	NA	Mmp7 matrix metallopeptidase 7	matrix metallopeptidase 3 precursor	macrophage metalloelastase	NA
ENSMUSG00000018661	OMA02984	No	No	No	No	No	Yes	No	Yes	No	NA	Cog1 component of oligomeric golgi complex 1	PREDICTED: conserved oligomeric Golgi complex subunit 1 isoform X1	conserved oligomeric Golgi complex subunit 1	component of oligomeric golgi complex 1, isoform CRA_a [Mus musculus]
ENSMUSG00000018669	OMA07952	No	No	Yes	No	No	No	No	No	No	Yes	Cdk5rap3 CDK5 regulatory subunit associated protein 3	CDK5 regulatory subunit-associated protein 3	CDK5 regulatory subunit-associated protein 3 isoform X2	TPA: CDK5 regulatory subunit associated protein 3 [Bos taurus]
ENSMUSG00000018672	OMA18048	No	No	NA	NA	NA	No	Act:-0.77	NA	NA	NA	Copz2 coatomer protein complex, subunit zeta 2	NA	coatomer subunit zeta-1 isoform X1	NA
ENSMUSG00000018697	OMA08964	No	No	Yes	Rep:1.31	No	NA	NA	No	No	No	Aatf apoptosis antagonizing transcription factor	protein AATF	NA	Aatf protein [Danio rerio]
ENSMUSG00000018698	OMA04119	Yes	Act:-2.44	Yes	No	NA	No	No	Yes	No	NA	Lhx1 LIM homeobox protein 1	LIM/homeobox protein Lhx1	Lim homeodomain transcription factor 1	LIM homeobox protein 1 [Nematostella vectensis]
ENSMUSG00000018707	OMA00021	No	No	NA	NA	Yes	No	No	No	No	No	Dync1h1 dynein cytoplasmic 1 heavy chain 1	NA	cytoplasmic dynein 1 heavy chain 1	cytoplasmic dynein 1 heavy chain 1 [Mus musculus]
ENSMUSG00000018752	OMA23235	Yes	No	No	No	NA	NA	NA	NA	NA	NA	Tnfsfm13 tumor necrosis factor (ligand) superfamily, membrane-bound member 13	PREDICTED: tumor necrosis factor ligand superfamily member 13	NA	NA
ENSMUSG00000018761	OMA16915	No	No	NA	NA	No	No	Act:-1.10	No	No	Yes	Mpdu1 mannose-P-dolichol utilization defect 1	NA	mannose-P-dolichol utilization defect 1 protein	RecName: Full=Mannose-P-dolichol utilization defect 1 protein; AltName: Full=Suppressor of Lec15 and Lec35 glycosylation mutation homolog; Short=SL15 [Mus musculus]
ENSMUSG00000018770	OMA15885	No	No	Yes	No	No	No	Act:-0.94	No	No	NA	Atp5g3 ATP synthase, H+ transporting, mitochondrial F0 complex, subunit C3 (subunit 9)	ATP synthase F(0) complex subunit C3, mitochondrial	ATP synthase F(0) complex subunit C2, mitochondrial	ATP synthase lipid-binding protein, mitochondrial precursor [Osmerus mordax]
ENSMUSG00000018776	OMA28447	No	No	NA	NA	NA	NA	NA	No	Act:-1.27	NA	Slc35g3 solute carrier family 35, member G3	NA	NA	similar to transmembrane protein 20 [Rattus norvegicus]
ENSMUSG00000018796	OMA02621	No	No	No	No	No	No	Act:-0.55	No	Act:-1.03	NA	Acsl1 acyl-CoA synthetase long-chain family member 1	long-chain-fatty-acid--CoA ligase 1	long-chain-fatty-acid--CoA ligase 6	Long-chain-fatty-acid--CoA ligase [Cerapachys biroi]
ENSMUSG00000018809	OMA09541	No	No	No	No	NA	Yes	No	No	No	NA	Smyd4 SET and MYND domain containing 4	SET and MYND domain-containing protein 4	SET and MYND domain-containing protein 4	SET and MYND domain-containing protein (SMYD), putative [Ixodes scapularis]
ENSMUSG00000018821	OMA24153	No	No	Yes	No	NA	NA	NA	NA	NA	NA	Avpi1 arginine vasopressin-induced 1	PREDICTED: arginine vasopressin-induced protein 1	NA	NA
ENSMUSG00000018822	OMA10380	Yes	No	No	No	Yes	NA	NA	NA	NA	NA	Sfrp5 secreted frizzled-related sequence protein 5	secreted frizzled-related protein 5 precursor	NA	NA
ENSMUSG00000018830	OMA00164	No	No	No	No	NA	No	Act:-0.60	NA	NA	NA	Myh11 myosin, heavy polypeptide 11, smooth muscle	PREDICTED: myosin-11 isoform X1	myosin-10 isoform X2	NA
ENSMUSG00000018845	OMA01545	No	No	Yes	No	No	No	No	Yes	No	No	Unc45b unc-45 myosin chaperone B	protein unc-45 homolog B	protein unc-45 homolog B	unc-45-like protein A [Crassostrea gigas]
ENSMUSG00000018858	OMA18795	No	No	No	No	No	No	Act:-1.08	No	No	NA	Mrpl58 mitochondrial ribosomal protein L58	PREDICTED: peptidyl-tRNA hydrolase ICT1, mitochondrial	peptidyl-tRNA hydrolase ICT1, mitochondrial	Peptidyl-tRNA hydrolase [Morus notabilis]
ENSMUSG00000018861	OMA06966	No	No	No	Act:-1.26	NA	No	No	No	No	No	Fdxr ferredoxin reductase	NADPH:adrenodoxin oxidoreductase, mitochondrial precursor	NADPH:adrenodoxin oxidoreductase, mitochondrial-like	NADPH:adrenodoxin oxidoreductase, mitochondrial [Heterocephalus glaber]
ENSMUSG00000018862	OMA14241	No	No	No	Act:-1.01	NA	NA	NA	NA	NA	NA	Otop3 otopetrin 3	PREDICTED: otopetrin-3-like	NA	NA
ENSMUSG00000018865	OMA07165	No	No	Yes	Rep:1.19	NA	No	No	No	No	NA	Sult4a1 sulfotransferase family 4A, member 1	sulfotransferase 4A1	sulfotransferase 1C2-like	aryl sulfotransferase [Saccoglossus kowalevskii]
ENSMUSG00000018899	OMA15075	Yes	No	No	Rep:1.08	NA	No	No	NA	NA	NA	Irf1 interferon regulatory factor 1	interferon regulatory factor 1	uncharacterized protein LOC575472 isoform X3	NA
ENSMUSG00000018900	OMA05119	No	No	No	No	No	No	No	No	Rep:1.89	NA	Slc22a5 solute carrier family 22 (organic cation transporter), member 5	PREDICTED: solute carrier family 22 member 5	organic cation transporter protein	organic cation transporter protein [Culex quinquefasciatus]
ENSMUSG00000018906	OMA04974	No	No	Yes	No	NA	No	Rep:0.85	No	No	NA	P4ha2 procollagen-proline, 2-oxoglutarate 4-dioxygenase (proline 4-hydroxylase), alpha II polypeptide	prolyl 4-hydroxylase subunit alpha-2 precursor	prolyl 4-hydroxylase subunit alpha-1 isoform X4	Prolyl 4-hydroxylase subunit alpha-1 [Harpegnathos saltator]
ENSMUSG00000018907	OMA20027	No	No	NA	NA	NA	No	Act:-1.81	NA	NA	NA	Alox12e arachidonate lipoxygenase, epidermal	NA	arachidonate 5-lipoxygenase	NA
ENSMUSG00000018921	OMA06937	No	No	Yes	No	NA	NA	NA	No	No	NA	Pelp1 proline, glutamic acid and leucine rich protein 1	PREDICTED: proline-, glutamic acid- and leucine-rich protein 1	NA	proline-, glutamic acid- and leucine-rich protein 1 [Cricetulus griseus]
ENSMUSG00000018924	OMA19904	Yes	No	NA	NA	NA	No	No	NA	NA	NA	Alox15 arachidonate 15-lipoxygenase	NA	allene oxide synthase-lipoxygenase protein	NA
ENSMUSG00000018965	OMA08374	No	No	No	No	NA	NA	NA	NA	NA	Yes	Ywhah tyrosine 3-monooxygenase/tryptophan 5-monooxygenase activation protein, eta polypeptide	14-3-3 protein eta	NA	NA
ENSMUSG00000018973	OMA20077	Yes	No	Yes	No	NA	NA	NA	NA	NA	NA	Hoxb1 homeobox B1	homeobox protein Hox-A1	NA	NA
ENSMUSG00000019054	OMA17706	No	No	No	No	No	No	No	NA	NA	Yes	Fis1 fission, mitochondrial 1	mitochondrial fission 1 protein	mitochondrial fission 1 protein	NA
ENSMUSG00000019088	OMA19500	No	No	Yes	No	NA	NA	NA	NA	NA	NA	Dnase1l1 deoxyribonuclease 1-like 1	PREDICTED: deoxyribonuclease-1-like isoform X1	NA	NA
ENSMUSG00000019102	OMA07816	No	No	No	No	No	No	Rep:0.62	NA	NA	NA	Aldh3a1 aldehyde dehydrogenase family 3, subfamily A1	fatty aldehyde dehydrogenase	aldehyde dehydrogenase family 3 member A2 isoform X3	NA
ENSMUSG00000019139	OMA05488	No	No	No	No	NA	No	No	No	No	Yes	Isyna1 myo-inositol 1-phosphate synthase A1	inositol-3-phosphate synthase 1	inositol-3-phosphate synthase 1-A-like	inositol-3-phosphate synthase 1-B [Xenopus laevis]
ENSMUSG00000019146	OMA05509	No	No	Yes	No	NA	NA	NA	NA	NA	NA	Cacng2 calcium channel, voltage-dependent, gamma subunit 2	voltage-dependent calcium channel gamma-2 subunit	NA	NA
ENSMUSG00000019173	OMA09761	No	No	No	No	Yes	NA	NA	NA	NA	NA	Rab5c RAB5C, member RAS oncogene family	ras-related protein Rab-5C	NA	NA
ENSMUSG00000019178	OMA16111	No	No	No	No	No	No	No	Yes	No	NA	Styxl1 serine/threonine/tyrosine interacting-like 1	PREDICTED: serine/threonine/tyrosine-interacting-like protein 1	serine/threonine/tyrosine-interacting-like protein 1	Serine/threonine/tyrosine-interacting-like protein 1 [Crassostrea gigas]
ENSMUSG00000019179	OMA07200	No	No	No	Act:-1.51	No	No	Act:-0.77	No	No	No	Mdh2 malate dehydrogenase 2, NAD (mitochondrial)	malate dehydrogenase, mitochondrial	malate dehydrogenase, mitochondrial	malate dehydrogenase [Salpingoeca rosetta]
ENSMUSG00000019189	OMA07544	No	No	No	No	NA	No	Rep:1.30	NA	NA	NA	Rnf145 ring finger protein 145	RING finger protein 145	RING finger protein 145	NA
ENSMUSG00000019232	OMA05649	No	No	No	No	No	No	Rep:0.73	No	No	No	Etnppl ethanolamine phosphate phospholyase	ethanolamine-phosphate phospho-lyase	ethanolamine-phosphate phospho-lyase isoform X3	alanine--glyoxylate aminotransferase 2-like 1 [Cricetulus griseus]
ENSMUSG00000019254	OMA07067	No	No	No	No	Yes	NA	NA	NA	NA	NA	Ppp1r12c protein phosphatase 1, regulatory (inhibitor) subunit 12C	PREDICTED: protein phosphatase 1 regulatory subunit 12C isoform X1	NA	NA
ENSMUSG00000019256	OMA05596	Yes	No	No	No	No	No	No	NA	NA	NA	Ahr aryl-hydrocarbon receptor	PREDICTED: aryl hydrocarbon receptor	mediator of RNA polymerase II transcription subunit 15a	NA
ENSMUSG00000019301	OMA15905	No	No	No	Rep:1.06	NA	No	No	Yes	No	NA	Hsd17b1 hydroxysteroid (17-beta) dehydrogenase 1	PREDICTED: estradiol 17-beta-dehydrogenase 1	retinol dehydrogenase 8-like	retinol dehydrogenase 8 like 2 [Cyprinus carpio]
ENSMUSG00000019302	OMA01068	No	No	Yes	No	No	No	No	No	No	No	Atp6v0a1 ATPase, H+ transporting, lysosomal V0 subunit A1	V-type proton ATPase 116 kDa subunit a isoform 1	V-type proton ATPase 116 kDa subunit a-like isoform X1	V-type proton ATPase 116 kDa subunit a isoform 1 [Myotis brandtii]
ENSMUSG00000019320	OMA19286	No	No	No	No	NA	NA	NA	No	Act:-1.18	NA	Noxo1 NADPH oxidase organizer 1	NADPH oxidase organizer 1	NA	p47phox protein [Takifugu rubripes]
ENSMUSG00000019362	OMA24148	No	No	Yes	No	NA	NA	NA	Yes	No	NA	D8Ertd738e DNA segment, Chr 8, ERATO Doi 738, expressed	PREDICTED: leydig cell tumor 10 kDa protein homolog	NA	Leydig cell tumor 10 kDa-like protein [Crassostrea gigas]
ENSMUSG00000019433	OMA09369	No	No	No	No	Yes	No	No	No	No	No	Gipc1 GIPC PDZ domain containing family, member 1	PDZ domain-containing protein GIPC1	PDZ domain-containing protein GIPC1-like	PDZ domain-containing protein GIPC3 [Danio rerio]
ENSMUSG00000019467	OMA08735	No	No	No	No	Yes	No	No	NA	NA	NA	Arhgef25 Rho guanine nucleotide exchange factor (GEF) 25	rho guanine nucleotide exchange factor 25	triple functional domain protein-like isoform X4	NA
ENSMUSG00000019487	NA	No	No	NA	NA	NA	NA	NA	NA	NA	NA	Trip10 thyroid hormone receptor interactor 10	NA	NA	NA
ENSMUSG00000019489	NA	Yes	No	NA	NA	NA	NA	NA	NA	NA	NA	Cd70 CD70 antigen	NA	NA	NA
ENSMUSG00000019494	OMA06324	No	No	No	No	NA	No	No	No	No	Yes	Cops6 COP9 signalosome subunit 6	COP9 signalosome complex subunit 6 isoform 1	COP9 signalosome complex subunit 6	COP9 signalosome complex subunit 6 [Danio rerio]
ENSMUSG00000019505	OMA05345	No	No	No	No	No	NA	NA	No	No	Yes	Ubb ubiquitin B	PREDICTED: polyubiquitin-C	NA	Ubc protein [Rattus norvegicus]
ENSMUSG00000019590	OMA14737	No	No	No	No	No	No	No	NA	NA	No	Cyb561 cytochrome b-561	cytochrome b561	cytochrome b561-like	NA
ENSMUSG00000019647	OMA00910	Yes	No	Yes	No	Yes	No	No	NA	NA	NA	Sema6a sema domain, transmembrane domain (TM), and cytoplasmic domain, (semaphorin) 6A	PREDICTED: semaphorin-6A isoform X1	semaphorin-6D-like isoform X6	NA
ENSMUSG00000019659	OMA17065	No	No	No	No	Yes	No	No	No	No	No	Ccdc12 coiled-coil domain containing 12	coiled-coil domain-containing protein 12	coiled-coil domain-containing protein 12	Coiled-coil domain-containing protein 12 [Salmo salar]
ENSMUSG00000019699	OMA07319	Yes	No	NA	NA	No	No	Act:-1.51	NA	NA	NA	Akt3 thymoma viral proto-oncogene 3	NA	LOW QUALITY PROTEIN: RAC serine/threonine-protein kinase-like	NA
ENSMUSG00000019715	OMA07453	No	No	No	No	NA	No	Rep:0.63	No	No	NA	Gle1 GLE1 RNA export mediator (yeast)	PREDICTED: nucleoporin GLE1 isoform X1	nucleoporin GLE1	Nucleoporin GLE1 [Myotis brandtii]
ENSMUSG00000019726	OMA00103	Yes	No	No	No	NA	No	Rep:0.80	No	No	NA	Lyst lysosomal trafficking regulator	PREDICTED: lysosomal-trafficking regulator	lysosomal-trafficking regulator isoform X4	rCG19935, isoform CRA_b [Rattus norvegicus]
ENSMUSG00000019731	OMA07328	No	No	No	No	Yes	No	No	No	No	No	Slc35e1 solute carrier family 35, member E1	solute carrier family 35 member E1	solute carrier family 35 member E1-like	MGC81612 protein [Xenopus laevis]
ENSMUSG00000019738	OMA13963	No	No	No	No	NA	No	Rep:0.91	No	No	No	Polr2i polymerase (RNA) II (DNA directed) polypeptide I	PREDICTED: DNA-directed RNA polymerase II subunit RPB9	LOW QUALITY PROTEIN: DNA-directed RNA polymerase II subunit RPB9	DNA-directed RNA polymerase II subunit RPB9 [Cricetulus griseus]
ENSMUSG00000019767	OMA10049	No	No	No	No	NA	No	Rep:0.49	No	No	NA	Ccdc170 coiled-coil domain containing 170	PREDICTED: coiled-coil domain-containing protein 170	coiled-coil domain-containing protein 170	Coiled-coil domain-containing protein 170;
ENSMUSG00000019768	OMA05258	No	Act:-8.70	No	No	NA	NA	NA	No	No	NA	Esr1 estrogen receptor 1 (alpha)	estrogen receptor precursor	NA	RxRa RxRa
ENSMUSG00000019772	OMA19906	Yes	No	No	Rep:1.29	NA	NA	NA	NA	NA	NA	Vip vasoactive intestinal polypeptide	PREDICTED: VIP peptides	NA	NA
ENSMUSG00000019773	OMA19003	Yes	No	No	No	NA	NA	NA	NA	NA	NA	Fbxo5 F-box protein 5	F-box only protein 5	NA	NA
ENSMUSG00000019775	OMA11475	Yes	No	No	No	Yes	No	Rep:2.20	No	No	NA	Rgs17 regulator of G-protein signaling 17	PREDICTED: regulator of G-protein signaling 17 isoform X1	regulator of G-protein signaling 20 isoform X2	Regulator of G-protein signaling 20 [Chelonia mydas]
ENSMUSG00000019777	OMA04365	No	No	Yes	No	Yes	No	No	NA	NA	NA	Hdac2 histone deacetylase 2	histone deacetylase 2	histone deacetylase 1	NA
ENSMUSG00000019779	OMA07606	Yes	No	No	No	No	No	No	NA	NA	NA	Frk fyn-related kinase	PREDICTED: tyrosine-protein kinase FRK	uncharacterized protein LOC583550 isoform X1	NA
ENSMUSG00000019787	OMA19487	Yes	No	No	No	NA	NA	NA	NA	NA	NA	Trdn triadin	PREDICTED: triadin isoform X10	NA	NA
ENSMUSG00000019789	OMA07699	No	No	No	No	NA	No	No	Yes	No	NA	Hey2 hairy/enhancer-of-split related with YRPW motif 2	PREDICTED: hairy/enhancer-of-split related with YRPW motif protein 2	hairy/enhancer-of-split related with YRPW motif protein 1	Hes1 [Nematostella vectensis]
ENSMUSG00000019790	OMA00561	Yes	No	No	No	No	No	No	No	No	NA	Stxbp5 syntaxin binding protein 5 (tomosyn)	PREDICTED: syntaxin-binding protein 5 isoform X1	syntaxin-binding protein 5 isoform X1	syntaxin-binding protein 5-like isoform s [Mus musculus]
ENSMUSG00000019796	OMA13355	No	No	No	No	Yes	NA	NA	NA	NA	NA	Lrp11 low density lipoprotein receptor-related protein 11	PREDICTED: low-density lipoprotein receptor-related protein 11 isoform X1	NA	NA
ENSMUSG00000019803	OMA04429	No	No	No	No	NA	No	Act:-1.65	NA	NA	NA	Nr2e1 nuclear receptor subfamily 2, group E, member 1	PREDICTED: nuclear receptor subfamily 2 group E member 1 isoform X1	nuclear receptor subfamily 2 group E member 1	NA
ENSMUSG00000019818	OMA23503	Yes	No	No	No	NA	NA	NA	NA	NA	NA	Cd164 CD164 antigen	PREDICTED: sialomucin core protein 24	NA	NA
ENSMUSG00000019820	OMA00105	Yes	No	Yes	No	NA	No	No	Yes	No	NA	Utrn utrophin	PREDICTED: utrophin isoform X1	dystrophin-like protein	dystrophin-like protein [Strongylocentrotus purpuratus]
ENSMUSG00000019828	OMA00807	Yes	Act:-7.89	No	No	NA	NA	NA	No	No	NA	Grm1 glutamate receptor, metabotropic 1	PREDICTED: metabotropic glutamate receptor 1	NA	metabotropic glutamate receptor 8 [Macaca mulatta]
ENSMUSG00000019832	OMA12967	No	No	No	No	NA	NA	NA	NA	NA	Yes	Rab32 RAB32, member RAS oncogene family	ras-related protein Rab-32	NA	NA
ENSMUSG00000019834	OMA10025	Yes	No	No	Act:-2.75	No	No	Act:-2.49	No	No	NA	Slc22a16 solute carrier family 22 (organic cation transporter), member 16	PREDICTED: solute carrier family 22 member 16	organic cation transporter protein isoform X2	GF16120 [Drosophila ananassae]
ENSMUSG00000019838	OMA06551	Yes	No	No	No	NA	Yes	No	No	No	NA	Slc16a10 solute carrier family 16 (monocarboxylic acid transporters), member 10	PREDICTED: monocarboxylate transporter 10	monocarboxylate transporter 10	monocarboxylate transporter 2 [Bos taurus]
ENSMUSG00000019843	OMA02392	Yes	No	No	No	No	No	No	No	No	No	Fyn Fyn proto-oncogene	PREDICTED: tyrosine-protein kinase Fyn isoform X1	src family kinase 7	tyrosine-protein kinase STK [Hydra vulgaris]
ENSMUSG00000019848	OMA11808	Yes	No	No	No	No	No	No	NA	NA	NA	Popdc3 popeye domain containing 3	popeye domain-containing protein 3	popeye domain-containing protein 3	NA
ENSMUSG00000019850	OMA21977	Yes	No	NA	NA	NA	NA	NA	No	No	NA	Tnfaip3 tumor necrosis factor, alpha-induced protein 3	NA	NA	tumor necrosis factor alpha-induced protein 3-like [Exaiptasia pallida]
ENSMUSG00000019853	OMA22705	No	No	No	No	NA	No	No	Yes	No	NA	Hebp2 heme binding protein 2	heme binding protein 2 precursor	heme-binding protein 2	Heme-binding protein 2 [Salmo salar]
ENSMUSG00000019854	OMA04223	No	No	No	No	Yes	No	No	NA	NA	NA	Reps1 RalBP1 associated Eps domain containing protein	ralBP1-associated Eps domain-containing protein 1	ralBP1-associated Eps domain-containing protein 1 isoform X2	NA
ENSMUSG00000019856	OMA01567	No	No	No	No	No	No	Rep:0.69	No	No	NA	Fam184a family with sequence similarity 184, member A	PREDICTED: protein FAM184A	protein FAM184A	protein FAM184A isoform 1 [Homo sapiens]
ENSMUSG00000019857	OMA13716	No	No	Yes	No	No	NA	NA	No	No	No	Asf1a anti-silencing function 1A histone chaperone	histone chaperone asf1b	NA	anti-silencing protein, putative [Ixodes scapularis]
ENSMUSG00000019861	OMA04986	No	No	No	No	No	No	Rep:0.76	No	No	NA	Gopc golgi associated PDZ and coiled-coil motif containing	Golgi-associated PDZ and coiled-coil motif-containing protein	Golgi-associated PDZ and coiled-coil motif-containing protein isoform X2	Golgi-associated PDZ and coiled-coil motif-containing protein [Cuculus canorus]
ENSMUSG00000019864	OMA08926	Yes	No	No	No	NA	No	No	No	No	NA	Rtn4ip1 reticulon 4 interacting protein 1	reticulon-4-interacting protein 1, mitochondrial	reticulon-4-interacting protein 1, mitochondrial	reticulon-4-interacting protein 1 homolog, mitochondrial [Danio rerio]
ENSMUSG00000019866	OMA03911	Yes	No	No	No	NA	NA	NA	NA	NA	NA	Crybg1 crystallin beta-gamma domain containing 1	PREDICTED: absent in melanoma 1 protein isoform X1	NA	NA
ENSMUSG00000019867	OMA11954	No	No	No	Act:-1.88	NA	NA	NA	NA	NA	NA	Gje1 gap junction protein, epsilon 1	PREDICTED: gap junction epsilon-1 protein-like	NA	NA
ENSMUSG00000019872	OMA08877	Yes	No	No	No	NA	NA	NA	NA	NA	No	Smpdl3a sphingomyelin phosphodiesterase, acid-like 3A	acid sphingomyelinase-like phosphodiesterase 3a precursor	NA	NA
ENSMUSG00000019873	OMA11873	Yes	No	Yes	No	No	NA	NA	NA	NA	Yes	Reep3 receptor accessory protein 3	PREDICTED: receptor expression-enhancing protein 3	NA	NA
ENSMUSG00000019874	OMA17577	Yes	Act:-4.22	No	No	No	NA	NA	NA	NA	NA	Fabp7 fatty acid binding protein 7, brain	fatty acid-binding protein, brain	NA	NA
ENSMUSG00000019876	OMA26632	No	Act:-6.01	No	No	NA	NA	NA	NA	NA	NA	Pkib protein kinase inhibitor beta, cAMP dependent, testis specific	PREDICTED: cAMP-dependent protein kinase inhibitor beta	NA	NA
ENSMUSG00000019877	OMA04526	Yes	No	No	No	No	No	No	No	No	No	Serinc1 serine incorporator 1	serine incorporator 1 precursor	probable serine incorporator isoform X2	serine incorporator 1 precursor [Xenopus laevis]
ENSMUSG00000019880	OMA13021	Yes	Act:-2.59	Yes	No	No	NA	NA	NA	NA	NA	Rspo3 R-spondin 3	R-spondin-3 precursor	NA	NA
ENSMUSG00000019883	OMA14495	No	No	Yes	No	No	No	No	NA	NA	NA	Echdc1 enoyl Coenzyme A hydratase domain containing 1	ethylmalonyl-CoA decarboxylase	ethylmalonyl-CoA decarboxylase	NA
ENSMUSG00000019888	OMA05354	Yes	No	No	No	No	No	Rep:0.80	Yes	No	No	Mgat4c MGAT4 family, member C	PREDICTED: alpha-1,3-mannosyl-glycoprotein 4-beta-N-acetylglucosaminyltransferase C	alpha-1,3-mannosyl-glycoprotein 4-beta-N-acetylglucosaminyltransferase C	MGAT4C protein [Homo sapiens]
ENSMUSG00000019889	OMA00238	Yes	No	No	No	Yes	No	No	No	No	NA	Ptprk protein tyrosine phosphatase, receptor type, K	PREDICTED: receptor-type tyrosine-protein phosphatase kappa isoform X10	receptor-type tyrosine-protein phosphatase kappa	receptor-type tyrosine-protein phosphatase S isoform 2 precursor [Homo sapiens]
ENSMUSG00000019891	OMA12449	No	No	Yes	No	NA	NA	NA	NA	NA	NA	Dcbld1 discoidin, CUB and LCCL domain containing 1	discoidin, CUB and LCCL domain-containing protein 1 precursor	NA	NA
ENSMUSG00000019892	OMA08069	No	No	Yes	No	NA	NA	NA	NA	NA	NA	Lrriq1 leucine-rich repeats and IQ motif containing 1	PREDICTED: leucine-rich repeat and IQ domain-containing protein 1	NA	NA
ENSMUSG00000019893	OMA02215	No	Act:-8.63	No	Rep:1.69	NA	NA	NA	NA	NA	NA	Ros1 Ros1 proto-oncogene	PREDICTED: proto-oncogene tyrosine-protein kinase ROS	NA	NA
ENSMUSG00000019894++	OMA02001	Yes	No	No	No	Yes	NA	NA	Yes	No	NA	Slc6a15 solute carrier family 6 (neurotransmitter transporter), member 15	PREDICTED: sodium-dependent neutral amino acid transporter B(0)AT2	NA	GF21785 [Drosophila ananassae]
ENSMUSG00000019897	OMA19607	Yes	No	No	No	NA	No	No	NA	NA	NA	Ccdc59 coiled-coil domain containing 59	thyroid transcription factor 1-associated protein 26	thyroid transcription factor 1-associated protein 26 homolog	NA
ENSMUSG00000019899	OMA00123	Yes	No	No	No	Yes	Yes	No	NA	NA	NA	Lama2 laminin, alpha 2	PREDICTED: laminin subunit alpha-2 isoform X1	laminin subunit alpha-2	NA
ENSMUSG00000019900	OMA02199	Yes	No	No	No	NA	No	No	Yes	No	NA	Rfx6 regulatory factor X, 6	PREDICTED: DNA-binding protein RFX6	DNA-binding protein RFX6	RFX6
ENSMUSG00000019907	OMA01658	No	No	No	No	Yes	No	No	No	No	NA	Ppp1r12a protein phosphatase 1, regulatory (inhibitor) subunit 12A	PREDICTED: protein phosphatase 1 regulatory subunit 12A isoform X1	protein phosphatase 1 regulatory subunit 12B isoform X4	Protein phosphatase 1 regulatory subunit 12A;
ENSMUSG00000019913	OMA01595	No	Act:-3.52	Yes	Rep:1.66	NA	No	No	NA	NA	NA	Sim1 single-minded homolog 1 (Drosophila)	PREDICTED: single-minded homolog 1 isoform X1	single-minded homolog 1	NA
ENSMUSG00000019916	OMA03882	No	No	No	No	No	No	Rep:0.85	No	No	NA	P4ha1 procollagen-proline, 2-oxoglutarate 4-dioxygenase (proline 4-hydroxylase), alpha 1 polypeptide	PREDICTED: prolyl 4-hydroxylase subunit alpha-1 isoform X1	prolyl 4-hydroxylase subunit alpha-1 isoform X4	prolyl 4-hydroxylase subunit alpha-1-like isoform 2 [Cricetulus griseus]
ENSMUSG00000019917	OMA06495	No	No	Yes	No	NA	NA	NA	NA	NA	NA	Sept10 septin 10	septin-10	NA	NA
ENSMUSG00000019920	OMA04749	No	No	No	No	Yes	No	No	No	No	No	Lims1 LIM and senescent cell antigen-like domains 1	LIM and senescent cell antigen-like-containing domain protein 1	LIM and senescent cell antigen-like-containing domain protein 1	PINCH PINCH
ENSMUSG00000019932	OMA11703	No	No	No	Act:-4.62	NA	NA	NA	NA	NA	NA	Kera keratocan	PREDICTED: keratocan	NA	NA
ENSMUSG00000019935	OMA03152	No	No	No	No	NA	NA	NA	No	Rep:1.20	NA	Slc17a8 solute carrier family 17 (sodium-dependent inorganic phosphate cotransporter), member 8	PREDICTED: vesicular glutamate transporter 3	NA	sialin, putative [Pediculus humanus corporis]
ENSMUSG00000019943	OMA00438	No	No	No	No	No	Yes	No	Yes	No	No	Atp2b1 ATPase, Ca++ transporting, plasma membrane 1	plasma membrane calcium-transporting ATPase 1	sperm plasma membrane calcium transporting ATPase	plasma membrane calcium ATPase [Stylophora pistillata]
ENSMUSG00000019951	OMA01659	No	No	No	No	Yes	No	No	No	No	NA	Uhrf1bp1l UHRF1 (ICBP90) binding protein 1-like	UHRF1-binding protein 1-like	UHRF1-binding protein 1-like isoform X2	UHRF1-binding protein 1-like protein [Crassostrea gigas]
ENSMUSG00000019952	OMA11289	Yes	No	No	No	NA	NA	NA	NA	NA	NA	Poc1b POC1 centriolar protein B	POC1 centriolar protein homolog B	NA	NA
ENSMUSG00000019960	OMA05460	Yes	No	Yes	No	NA	No	No	NA	NA	NA	Dusp6 dual specificity phosphatase 6	dual specificity protein phosphatase 6	dual specificity protein phosphatase 6-like	NA
ENSMUSG00000019961	OMA17661	No	No	Yes	No	NA	NA	NA	NA	NA	NA	Tmpo thymopoietin	thymopoietin	NA	NA
ENSMUSG00000019966	OMA22784	Yes	No	No	No	NA	NA	NA	NA	NA	NA	Kitl kit ligand	kit ligand precursor	NA	NA
ENSMUSG00000019969	OMA05376	No	No	No	No	NA	No	Act:-0.56	NA	NA	No	Psen1 presenilin 1	presenilin-1	presenilin-1	NA
ENSMUSG00000019970	OMA04256	No	No	Yes	No	NA	No	Rep:0.89	No	No	No	Sgk1 serum/glucocorticoid regulated kinase 1	serine/threonine-protein kinase Sgk1	serine/threonine-protein kinase Sgk1	serine/threonine-protein kinase Sgk3 isoform 1 [Homo sapiens]
ENSMUSG00000019971	OMA01536	No	No	NA	NA	NA	No	Rep:0.65	No	No	NA	Cep290 centrosomal protein 290	NA	centrosomal protein of 290 kDa isoform X5	LOC100125168 protein [Xenopus (Silurana) tropicalis]
ENSMUSG00000019977++	OMA03297	Yes	No	No	No	No	No	No	Yes	No	No	Hbs1l Hbs1-like (S. cerevisiae)	HBS1-like protein	HBS1-like protein isoform X2	HBS1-like protein [Pongo abelii]
ENSMUSG00000019978	NA	Yes	No	NA	NA	NA	NA	NA	NA	NA	NA	Epb41l2 erythrocyte membrane protein band 4.1 like 2	NA	NA	NA
ENSMUSG00000019979	OMA01777	No	No	No	No	NA	No	Rep:1.19	No	No	NA	Apaf1 apoptotic peptidase activating factor 1	PREDICTED: apoptotic protease-activating factor 1	apoptotic protease-activating factor 1	APAF-1 [Hydra vulgaris]
ENSMUSG00000019984	OMA00279	Yes	No	No	No	No	No	No	No	No	NA	Med23 mediator complex subunit 23	PREDICTED: mediator of RNA polymerase II transcription subunit 23 isoform X1	mediator of RNA polymerase II transcription subunit 23	mediator complex subunit MED23 variant MED23_i8 [Homo sapiens]
ENSMUSG00000019986	OMA06412	No	No	No	No	No	No	Rep:0.60	No	No	NA	Ahi1 Abelson helper integration site 1	PREDICTED: jouberin isoform X1	jouberin isoform X3	Jouberin [Crassostrea gigas]
ENSMUSG00000019987	OMA10685	Yes	Act:-5.06	No	No	NA	No	No	NA	NA	No	Arg1 arginase, liver	arginase-1	arginase-1	NA
ENSMUSG00000019990	OMA04848	Yes	No	No	No	NA	No	No	NA	NA	NA	Pde7b phosphodiesterase 7B	cAMP-specific 3',5'-cyclic phosphodiesterase 7B	uncharacterized protein LOC100888624 isoform X2	NA
ENSMUSG00000019996	OMA09009	Yes	No	No	No	NA	NA	NA	NA	NA	NA	Map7 microtubule-associated protein 7	PREDICTED: ensconsin isoform X1	NA	NA
ENSMUSG00000019997	OMA10426	No	No	No	No	Yes	NA	NA	NA	NA	NA	Ctgf connective tissue growth factor	connective tissue growth factor precursor	NA	NA
ENSMUSG00000020003	OMA08906	No	No	No	No	NA	No	No	No	No	Yes	Pex7 peroxisomal biogenesis factor 7	peroxisomal biogenesis factor 7	peroxisomal targeting signal 2 receptor	peroxisomal biogenesis factor 7 [Xenopus (Silurana) tropicalis]
ENSMUSG00000020009	OMA24354	No	No	Yes	No	NA	NA	NA	NA	NA	NA	Ifngr1 interferon gamma receptor 1	interferon gamma receptor 1 precursor	NA	NA
ENSMUSG00000020010	OMA08777	No	No	No	Act:-1.98	NA	NA	NA	NA	NA	NA	Vnn3 vanin 3	PREDICTED: pantetheinase	NA	NA
ENSMUSG00000020014	OMA01058	Yes	No	No	No	NA	No	No	No	No	NA	Cfap54 cilia and flagella associated protein 54	PREDICTED: cilia- and flagella-associated protein 54 isoform X1	cilia- and flagella-associated protein 54-like	Uncharacterized protein C12orf55 [Crassostrea gigas]
ENSMUSG00000020017	OMA02229	No	No	No	No	No	No	Rep:0.77	No	No	No	Hal histidine ammonia lyase	histidine ammonia-lyase	histidine ammonia-lyase	Histidine ammonia-lyase [Chaetura pelagica]
ENSMUSG00000020018	OMA17222	Yes	No	No	No	NA	No	No	No	No	No	Snrpf small nuclear ribonucleoprotein polypeptide F	small nuclear ribonucleoprotein F	LOW QUALITY PROTEIN: small nuclear ribonucleoprotein F	Small nuclear ribonucleoprotein F [Pteropus alecto]
ENSMUSG00000020019	OMA04361	No	No	No	No	Yes	NA	NA	NA	NA	NA	Ntn4 netrin 4	PREDICTED: netrin-4	NA	NA
ENSMUSG00000020021	OMA02808	No	No	No	No	NA	Yes	No	No	No	NA	Fgd6 FYVE, RhoGEF and PH domain containing 6	PREDICTED: FYVE, RhoGEF and PH domain-containing protein 6 isoform X1	FYVE, RhoGEF and PH domain-containing protein 6 isoform X2	FGD6 protein [Homo sapiens]
ENSMUSG00000020023	OMA05187	No	No	Yes	No	NA	No	No	NA	NA	NA	Tmcc3 transmembrane and coiled coil domains 3	transmembrane and coiled-coil domains protein 3	transmembrane and coiled-coil domains protein 2 isoform X3	NA
ENSMUSG00000020024	OMA04898	No	No	No	No	No	No	Act:-1.00	No	No	NA	Cep83 centrosomal protein 83	centrosomal protein of 83 kDa	centrosomal protein of 83 kDa-like isoform X2	Coiled-coil domain-containing protein 41 [Crassostrea gigas]
ENSMUSG00000020027	OMA16521	No	No	No	No	Yes	NA	NA	NA	NA	NA	Socs2 suppressor of cytokine signaling 2	suppressor of cytokine signaling 2	NA	NA
ENSMUSG00000020029	OMA11740	No	No	No	No	No	No	Act:-1.65	No	No	NA	Nudt4 nudix (nucleoside diphosphate linked moiety X)-type motif 4	diphosphoinositol polyphosphate phosphohydrolase 2	diphosphoinositol polyphosphate phosphohydrolase 1-like	diphosphoinositol polyphosphate phosphohydrolase 2 [Danio rerio]
ENSMUSG00000020032	OMA03715	Yes	No	No	No	NA	No	No	NA	NA	NA	Nuak1 NUAK family, SNF1-like kinase, 1	PREDICTED: NUAK family SNF1-like kinase 1	NUAK family SNF1-like kinase 1	NA
ENSMUSG00000020037	OMA02504	Yes	No	No	Rep:1.09	NA	No	No	Yes	No	NA	Rfx4 regulatory factor X, 4 (influences HLA class II expression)	PREDICTED: transcription factor RFX4	transcription factor RFX4-like	RFX4-like
ENSMUSG00000020038	OMA02299	No	No	No	No	NA	No	Act:-0.92	No	No	No	Cry1 cryptochrome 1 (photolyase-like)	cryptochrome-1	cryptochrome-1	cryptochrome CRY1 [Acropora millepora]
ENSMUSG00000020048	OMA01402	No	No	No	No	NA	No	Act:-1.69	No	No	Yes	Hsp90b1 heat shock protein 90, beta (Grp94), member 1	endoplasmin precursor	endoplasmin-like	Endoplasmin [Zootermopsis nevadensis]
ENSMUSG00000020051	OMA05808	No	No	No	Act:-1.11	No	No	Act:-0.73	No	No	Yes	Pah phenylalanine hydroxylase	phenylalanine-4-hydroxylase	protein henna isoform X1	phenylalanine hydroxlase [Saccoglossus kowalevskii]
ENSMUSG00000020052++	OMA12412	Yes	No	No	No	Yes	Yes	Act:-2.03	NA	NA	NA	Ascl1 achaete-scute family bHLH transcription factor 1	PREDICTED: achaete-scute homolog 1	achaete-scute homolog 1	NA
ENSMUSG00000020053	OMA16651	Yes	No	No	No	NA	NA	NA	NA	NA	NA	Igf1 insulin-like growth factor 1	PREDICTED: insulin-like growth factor I	NA	NA
ENSMUSG00000020061	OMA01072	No	No	No	No	Yes	NA	NA	NA	NA	NA	Mybpc1 myosin binding protein C, slow-type	PREDICTED: myosin-binding protein C, slow-type isoform X1	NA	NA
ENSMUSG00000020062	OMA04295	No	No	No	Act:-1.20	No	No	Act:-1.01	No	Rep:1.44	NA	Slc5a8 solute carrier family 5 (iodide transporter), member 8	sodium-coupled monocarboxylate transporter 1	sodium-coupled monocarboxylate transporter 1	Sodium-coupled monocarboxylate transporter 1 [Crassostrea gigas]
ENSMUSG00000020063	OMA05172	No	No	No	No	NA	No	No	Yes	No	No	Sirt1 sirtuin 1	NAD-dependent protein deacetylase sirtuin-1	NAD-dependent protein deacetylase sirtuin-1 isoform X2	NAD-dependent deacetylase sirtuin-1 [Gallus gallus]
ENSMUSG00000020064	OMA00953	No	No	No	No	Yes	No	No	No	No	NA	Herc4 hect domain and RLD 4	probable E3 ubiquitin-protein ligase HERC4	probable E3 ubiquitin-protein ligase HERC4	Putative E3 ubiquitin-protein ligase HERC4 [Crassostrea gigas]
ENSMUSG00000020070	OMA07674	Yes	No	No	No	No	No	No	NA	NA	NA	Rufy2 RUN and FYVE domain-containing 2	RUN and FYVE domain-containing protein 2	RUN and FYVE domain-containing protein 2 isoform X1	NA
ENSMUSG00000020072	OMA24544	Yes	No	NA	NA	No	NA	NA	NA	NA	NA	Pbld2 phenazine biosynthesis-like protein domain containing 2	NA	NA	NA
ENSMUSG00000020079	OMA03149	No	No	No	No	NA	No	No	Yes	No	No	Supv3l1 suppressor of var1, 3-like 1 (S. cerevisiae)	PREDICTED: ATP-dependent RNA helicase SUPV3L1, mitochondrial	ATP-dependent RNA helicase SUPV3L1, mitochondrial	ATP-dependent RNA helicase SUPV3L1, mitochondrial precursor [Gallus gallus]
ENSMUSG00000020080	OMA01315	No	No	No	No	Yes	NA	NA	NA	NA	NA	Hkdc1 hexokinase domain containing 1	PREDICTED: putative hexokinase HKDC1	NA	NA
ENSMUSG00000020081	OMA23126	No	No	NA	NA	NA	No	No	Yes	No	NA	Tacr2 tachykinin receptor 2	NA	G-protein coupled receptor 54	galanin receptor type 2 [Bos taurus]
ENSMUSG00000020089	OMA11143	No	No	No	No	No	No	Act:-0.82	No	No	No	Ppa1 pyrophosphatase (inorganic) 1	inorganic pyrophosphatase	inorganic pyrophosphatase	inorganic pyrophosphatase [Aedes aegypti]
ENSMUSG00000020090	OMA08865	No	No	No	No	NA	No	No	Yes	No	NA	Npffr1 neuropeptide FF receptor 1	PREDICTED: neuropeptide FF receptor 1	prokineticin receptor 2-like	tachykinin NK-1 receptor B isoform [Rhinella marina]
ENSMUSG00000020091	OMA18626	No	No	No	No	Yes	No	No	NA	NA	NA	Eif4ebp2 eukaryotic translation initiation factor 4E binding protein 2	eukaryotic translation initiation factor 4E-binding protein 2	uncharacterized protein LOC752411	NA
ENSMUSG00000020092++	OMA03831	Yes	No	Yes	No	NA	No	No	Yes	No	Yes	Pald1 phosphatase domain containing, paladin 1	paladin	paladin	Paladin [Dicentrarchus labrax]
ENSMUSG00000020099++	OMA01304	Yes	No	No	No	NA	No	No	NA	NA	NA	Unc5b unc-5 netrin receptor B	PREDICTED: netrin receptor UNC5B isoform X1	netrin receptor UNC5C isoform X2	NA
ENSMUSG00000020100	OMA18158	No	No	Yes	No	NA	NA	NA	No	No	NA	Slc29a3 solute carrier family 29 (nucleoside transporters), member 3	equilibrative nucleoside transporter 3	NA	Equilibrative nucleoside transporter 1 [Pteropus alecto]
ENSMUSG00000020101	OMA18609	No	No	Yes	No	NA	NA	NA	NA	NA	NA	Vsir V-set immunoregulatory receptor	platelet receptor Gi24	NA	NA
ENSMUSG00000020102	OMA07330	No	No	No	No	NA	No	No	Yes	No	NA	Slc16a7 solute carrier family 16 (monocarboxylic acid transporters), member 7	monocarboxylate transporter 2	monocarboxylate transporter 6	monocarboxylate transporter 10 [Danio rerio]
ENSMUSG00000020105	OMA01670	Yes	No	Yes	No	NA	Yes	No	No	No	NA	Lrig3 leucine-rich repeats and immunoglobulin-like domains 3	PREDICTED: leucine-rich repeats and immunoglobulin-like domains protein 3	leucine-rich repeats and immunoglobulin-like domains protein 3	PREDICTED: leucine-rich repeats and immunoglobulin-like domains protein 3-like [Heterocephalus glaber]
ENSMUSG00000020107	OMA16049	Yes	No	No	No	NA	NA	NA	NA	NA	NA	Anapc16 anaphase promoting complex subunit 16	anaphase-promoting complex subunit 16	NA	NA
ENSMUSG00000020108++	OMA17774	Yes	No	Yes	No	NA	Yes	No	NA	NA	NA	Ddit4 DNA-damage-inducible transcript 4	DNA damage-inducible transcript 4 protein	DNA damage-inducible transcript 4-like protein isoform X1	NA
ENSMUSG00000020111	OMA04476	No	No	Yes	No	No	No	No	No	No	No	Micu1 mitochondrial calcium uptake 1	calcium uptake protein 1, mitochondrial	calcium uptake protein 1, mitochondrial	calcium binding atopy-related autoantigen [Schistosoma mansoni]
ENSMUSG00000020114	OMA00295	Yes	No	No	No	Yes	No	No	NA	NA	No	Cand1 cullin associated and neddylation disassociated 1	cullin-associated NEDD8-dissociated protein 1	cullin-associated NEDD8-dissociated protein 1 isoform X1	NA
ENSMUSG00000020115	OMA02576	No	No	No	No	NA	No	No	Yes	No	NA	Tbk1 TANK-binding kinase 1	serine/threonine-protein kinase TBK1	inhibitor of nuclear factor kappa-B kinase subunit epsilon isoform X3	PREDICTED: serine/threonine-protein kinase TBK1 [Tribolium castaneum]
ENSMUSG00000020120	OMA08206	No	No	No	No	NA	No	No	No	Act:-1.08	No	Plek pleckstrin	pleckstrin	pleckstrin-2	pleckstrin-2 [Gallus gallus]
ENSMUSG00000020122	OMA01438	No	No	No	No	No	No	Rep:0.51	NA	NA	NA	Egfr epidermal growth factor receptor	PREDICTED: epidermal growth factor receptor	receptor tyrosine-protein kinase erbB-4 isoform X2	NA
ENSMUSG00000020123	OMA08150	Yes	No	No	Act:-1.60	No	No	No	NA	NA	NA	Avpr1a arginine vasopressin receptor 1A	PREDICTED: vasopressin V1a receptor	oxytocin receptor	NA
ENSMUSG00000020130	OMA03431	No	No	No	No	NA	No	Rep:0.83	Yes	No	No	Tbc1d15 TBC1 domain family, member 15	TBC1 domain family member 15	TBC1 domain family member 15 isoform X1	TBC1 domain family member 15 [Crassostrea gigas]
ENSMUSG00000020132	OMA09466	No	No	No	No	No	No	Act:-1.30	No	No	No	Rab21 RAB21, member RAS oncogene family	ras-related protein Rab-21	ras-related protein Rab-21-like	Ras-related protein Rab-21 [Crassostrea gigas]
ENSMUSG00000020134	OMA03319	No	No	No	No	Yes	No	No	Yes	No	NA	Peli1 pellino 1	E3 ubiquitin-protein ligase pellino homolog 1	E3 ubiquitin-protein ligase pellino homolog 1 isoform X3	pellino E3 ubiquitin protein ligase 1 [Xenopus laevis]
ENSMUSG00000020142	OMA05065	Yes	No	No	No	NA	NA	NA	Yes	No	NA	Slc1a4 solute carrier family 1 (glutamate/neutral amino acid transporter), member 4	neutral amino acid transporter A	NA	solute carrier family 1 (glial high affinity glutamate transporter), member 3a [Danio rerio]
ENSMUSG00000020149	OMA09325	Yes	No	No	No	No	No	No	No	No	No	Rab1a RAB1A, member RAS oncogene family	ras-related protein Rab-1A	ras-related protein ORAB-1 isoform X3	Ras-related protein Rab-1A [Haliotis discus discus]
ENSMUSG00000020150	OMA12247	No	No	No	Act:-1.22	No	No	No	No	No	NA	Gamt guanidinoacetate methyltransferase	guanidinoacetate N-methyltransferase	guanidinoacetate N-methyltransferase-like	putative methyltransferase (ISS) [Ostreococcus tauri]
ENSMUSG00000020152	OMA03592	Yes	No	No	No	No	No	No	No	No	No	Actr2 ARP2 actin-related protein 2	actin-related protein 2	actin-related protein 2 isoform X1	Chain B, Crystal Structure Of Bovine Arp23 COMPLEX CO-Crystallized With Atp And Crosslinked With Glutaraldehyde
ENSMUSG00000020153	OMA12423	No	No	Yes	No	No	Yes	Act:-0.65	No	No	Yes	Ndufs7 NADH dehydrogenase (ubiquinone) Fe-S protein 7	NADH dehydrogenase	uncharacterized protein LOC574929	probable NADH-ubiquinone oxidoreductase 19.3 kDa subunit, mitochondrial precursor [Fusarium fujikuroi IMI 58289]
ENSMUSG00000020154	OMA00544	Yes	No	No	No	NA	NA	NA	NA	NA	NA	Ptprb protein tyrosine phosphatase, receptor type, B	receptor-type tyrosine-protein phosphatase beta precursor	NA	NA
ENSMUSG00000020160	OMA04449	No	No	Yes	No	Yes	No	No	NA	NA	NA	Meis1 Meis homeobox 1	PREDICTED: homeobox protein Meis1 isoform X1	homeobox protein Meis1-like	NA
ENSMUSG00000020167	OMA06803	No	No	Yes	No	NA	No	No	NA	NA	NA	Tcf3 transcription factor 3	transcription factor E2-alpha	transcription factor 12-like isoform X2	NA
ENSMUSG00000020173	OMA10304	Yes	No	No	Act:-1.30	NA	No	No	NA	NA	NA	Cobl cordon-bleu WH2 repeat	PREDICTED: protein cordon-bleu	protein cordon-bleu-like isoform X1	NA
ENSMUSG00000020176	OMA04623	No	No	No	No	NA	No	No	No	Act:-1.00	NA	Grb10 growth factor receptor bound protein 10	growth factor receptor-bound protein 10	growth factor receptor-bound protein 14	growth factor receptor-bound protein 10 [synthetic construct]
ENSMUSG00000020180	OMA13551	Yes	No	No	No	No	No	No	No	No	Yes	Snrpd3 small nuclear ribonucleoprotein D3	small nuclear ribonucleoprotein Sm D3	small nuclear ribonucleoprotein Sm D3	Small nuclear ribonucleoprotein Sm D3 [Fukomys damarensis]
ENSMUSG00000020181	OMA00152	Yes	No	No	No	NA	No	No	NA	NA	NA	Nav3 neuron navigator 3	PREDICTED: neuron navigator 3 isoform X1	neuron navigator 2 isoform X2	NA
ENSMUSG00000020182	OMA05267	Yes	No	No	No	Yes	No	No	Yes	No	No	Ddc dopa decarboxylase	aromatic-L-amino-acid decarboxylase	aromatic-L-amino-acid decarboxylase	PREDICTED: aromatic-L-amino-acid decarboxylase-like isoform X2 [Columba livia]
ENSMUSG00000020185	OMA14817	Yes	No	Yes	No	NA	No	No	No	No	NA	E2f7 E2F transcription factor 7	PREDICTED: transcription factor E2F8	transcription factor E2F8 isoform X1	transcription factor E2F7 [Rattus norvegicus]
ENSMUSG00000020186	OMA11547	No	No	No	No	NA	NA	NA	Yes	No	No	Csrp2 cysteine and glycine-rich protein 2	cysteine and glycine-rich protein 2	NA	cysteine and glycine-rich protein 1, isoform CRA_b [Rattus norvegicus]
ENSMUSG00000020190	OMA05163	No	No	Yes	No	Yes	No	No	No	No	No	Mknk2 MAP kinase-interacting serine/threonine kinase 2	MAP kinase-interacting serine/threonine-protein kinase 2	MAP kinase-interacting serine/threonine-protein kinase 1	MAP kinase-interacting serine/threonine-protein kinase 2 [Xenopus laevis]
ENSMUSG00000020191	OMA19469	Yes	No	No	No	NA	No	No	No	No	NA	4930415F15Rik RIKEN cDNA 4930415F15 gene	PREDICTED: uncharacterized protein C7orf72 homolog	spermatogenesis-associated protein 48-like	Putative protein C7orf72 [Chelonia mydas]
ENSMUSG00000020193	NA	No	No	NA	NA	NA	NA	NA	NA	NA	NA	Zpbp zona pellucida binding protein	NA	NA	NA
ENSMUSG00000020205	OMA15890	Yes	No	No	No	NA	NA	NA	NA	NA	NA	Phlda1 pleckstrin homology like domain, family A, member 1	pleckstrin homology-like domain family A member 1	NA	NA
ENSMUSG00000020213	OMA23072	Yes	No	NA	NA	NA	No	No	NA	NA	NA	Glipr1l1 GLI pathogenesis-related 1 like 1	NA	uncharacterized protein LOC100889316 isoform X1	NA
ENSMUSG00000020219	OMA18119	No	No	Yes	No	NA	No	No	No	No	No	Timm13 translocase of inner mitochondrial membrane 13	mitochondrial import inner membrane translocase subunit Tim13	mitochondrial import inner membrane translocase subunit Tim13-like	mitochondrial import inner membrane translocase subunit tim-13 [Gaeumannomyces graminis var. tritici R3-111a-1]
ENSMUSG00000020220	OMA00032	No	No	Yes	No	NA	No	No	No	No	NA	Vps13d vacuolar protein sorting 13D	PREDICTED: vacuolar protein sorting-associated protein 13D isoform X1	vacuolar protein sorting-associated protein 13D	Vacuolar protein sorting-associated protein 13D [Fukomys damarensis]
ENSMUSG00000020225	OMA13099	No	No	No	No	NA	No	Rep:0.65	No	No	NA	Tmbim4 transmembrane BAX inhibitor motif containing 4	protein lifeguard 4	protein lifeguard 4	transmembrane BAX inhibitor motif containing 4 [Callorhinchus milii]
ENSMUSG00000020226	NA	Yes	No	NA	NA	NA	NA	NA	NA	NA	NA	Slc5a4b solute carrier family 5 (neutral amino acid transporters, system A), member 4b	NA	NA	NA
ENSMUSG00000020235	OMA02517	No	No	Yes	No	No	No	Rep:0.83	No	No	No	Fzr1 fizzy/cell division cycle 20 related 1 (Drosophila)	fizzy-related protein homolog	fizzy-related protein homolog	fizzy-like protein [Saccoglossus kowalevskii]
ENSMUSG00000020241	OMA02688	No	No	No	No	Yes	No	No	NA	NA	NA	Col6a2 collagen, type VI, alpha 2	collagen alpha-2(VI) chain precursor	colmedin	NA
ENSMUSG00000020246	OMA04303	No	No	No	No	NA	No	Act:-0.88	No	No	NA	Hcfc2 host cell factor C2	PREDICTED: host cell factor 2 isoform X1	host cell factor 1 isoform X4	kelch repeat protein [Necator americanus]
ENSMUSG00000020248	OMA10459	No	No	No	No	No	No	Act:-0.76	No	No	No	Nfyb nuclear transcription factor-Y beta	PREDICTED: nuclear transcription factor Y subunit beta isoform X1	CCAAT-binding transcription factor subunit A isoform X1	RecName: Full=Nuclear transcription factor Y subunit beta; AltName: Full=CAAT box DNA-binding protein subunit B; AltName: Full=Nuclear transcription factor Y subunit B; Short=NF-YB [Petromyzon marinus]
ENSMUSG00000020251	OMA10062	No	No	No	Rep:1.53	NA	NA	NA	NA	NA	No	Glt8d2 glycosyltransferase 8 domain containing 2	PREDICTED: glycosyltransferase 8 domain-containing protein 2	NA	NA
ENSMUSG00000020261	OMA07052	No	No	No	No	No	No	Act:-0.98	No	No	Yes	Slc36a1 solute carrier family 36 (proton/amino acid symporter), member 1	PREDICTED: proton-coupled amino acid transporter 1 isoform X1	proton-coupled amino acid transporter 1 isoform X2	proton-coupled amino acid transporter 1 [Rattus norvegicus]
ENSMUSG00000020262	OMA02582	No	No	No	No	No	No	Rep:0.91	No	No	NA	Adarb1 adenosine deaminase, RNA-specific, B1	double-stranded RNA-specific editase 1	double-stranded RNA-specific editase 1	RNA transcript variant b adenosine deaminase [Doryteuthis opalescens]
ENSMUSG00000020264	OMA08561	No	No	No	No	No	No	Act:-0.98	NA	NA	NA	Slc36a2 solute carrier family 36 (proton/amino acid symporter), member 2	PREDICTED: proton-coupled amino acid transporter 1 isoform X1	proton-coupled amino acid transporter 1 isoform X2	NA
ENSMUSG00000020265	OMA16708	No	No	No	No	No	No	Rep:0.70	NA	NA	No	Sumo3 small ubiquitin-like modifier 3	small ubiquitin-related modifier 3	small ubiquitin-related modifier 3	NA
ENSMUSG00000020273	OMA02872	No	No	Yes	No	No	No	No	No	No	NA	Papolg poly(A) polymerase gamma	poly(A) polymerase gamma	poly(A) polymerase beta-like isoform X1	poly(A) polymerase alpha (pap) [Xenopus (Silurana) tropicalis]
ENSMUSG00000020275	OMA09149	No	No	No	Rep:1.24	No	No	No	NA	NA	NA	Rel reticuloendotheliosis oncogene	proto-oncogene c-Rel	NFkB protein	NA
ENSMUSG00000020282	OMA01349	No	No	No	No	NA	No	No	Yes	No	No	Rhbdf1 rhomboid 5 homolog 1	PREDICTED: inactive rhomboid protein 1 isoform X1	inactive rhomboid protein 1 isoform X5	inactive rhomboid protein 1-like isoform X1 [Exaiptasia pallida]
ENSMUSG00000020286	NA	Yes	No	NA	NA	NA	NA	NA	NA	NA	NA	1700093K21Rik RIKEN cDNA 1700093K21 gene	NA	NA	NA
ENSMUSG00000020290	OMA00408	No	No	Yes	No	No	No	Rep:0.94	No	No	No	Xpo1 exportin 1	PREDICTED: exportin-1	exportin-1	exportin 1 [Xenopus laevis]
ENSMUSG00000020300	OMA01303	Yes	No	No	No	NA	No	No	Yes	No	NA	Cpeb4 cytoplasmic polyadenylation element binding protein 4	PREDICTED: cytoplasmic polyadenylation element-binding protein 4 isoform X1	cytoplasmic polyadenylation element-binding protein 2 isoform X3	cytoplasmatic polyadenylation element binding protein 2A [Danio rerio]
ENSMUSG00000020308	OMA16271	No	No	No	No	Yes	No	No	No	No	NA	Tpgs1 tubulin polyglutamylase complex subunit 1	PREDICTED: tubulin polyglutamylase complex subunit 1	tubulin polyglutamylase complex subunit 1 isoform X1	Tubulin polyglutamylase complex subunit 1 [Crassostrea gigas]
ENSMUSG00000020312	OMA18129	No	No	NA	NA	NA	No	Act:-1.28	NA	NA	NA	Shc2 SHC (Src homology 2 domain containing) transforming protein 2	NA	SHC-transforming protein 1 isoform X1	NA
ENSMUSG00000020315	OMA00267	Yes	No	No	No	Yes	Yes	No	NA	NA	NA	Sptbn1 spectrin beta, non-erythrocytic 1	PREDICTED: spectrin beta chain, non-erythrocytic 2 isoform X1	spectrin beta chain, non-erythrocytic 1 isoform X2	NA
ENSMUSG00000020323	OMA19250	No	No	No	Rep:1.95	NA	NA	NA	NA	NA	NA	Prss57 protease, serine 57	PREDICTED: complement factor D	NA	NA
ENSMUSG00000020326	OMA10144	Yes	No	No	No	NA	NA	NA	No	No	NA	Ccng1 cyclin G1	cyclin-G1	NA	uncharacterized protein LOC100125081 [Xenopus (Silurana) tropicalis]
ENSMUSG00000020333	OMA02515	Yes	No	No	No	No	No	No	No	No	No	Acsl6 acyl-CoA synthetase long-chain family member 6	long-chain-fatty-acid--CoA ligase 6	long-chain-fatty-acid--CoA ligase 1 isoform X2	Long-chain-fatty-acid--CoA ligase 5 [Dicentrarchus labrax]
ENSMUSG00000020334	OMA05633	No	No	No	No	Yes	No	No	No	Act:-1.19	NA	Slc22a4 solute carrier family 22 (organic cation transporter), member 4	solute carrier family 22 member 4	organic cation transporter protein isoform X1	GK11736 [Drosophila willistoni]
ENSMUSG00000020340	OMA00255	No	No	No	No	No	No	Rep:1.13	NA	NA	No	Cyfip2 cytoplasmic FMR1 interacting protein 2	cytoplasmic FMR1-interacting protein 2	cytoplasmic FMR1-interacting protein 2 isoform X2	NA
ENSMUSG00000020349	OMA05117	No	No	No	No	No	No	Rep:0.76	No	No	No	Ppp2ca protein phosphatase 2 (formerly 2A), catalytic subunit, alpha isoform	serine/threonine-protein phosphatase 2A catalytic subunit alpha isoform	serine/threonine-protein phosphatase 2A catalytic subunit beta isoform	type 2A protein phosphatase catalytic subunit [Loa loa]
ENSMUSG00000020354	OMA13065	Yes	No	No	No	NA	No	Rep:0.75	NA	NA	No	Sgcd sarcoglycan, delta (dystrophin-associated glycoprotein)	PREDICTED: delta-sarcoglycan	zeta-sarcoglycan	NA
ENSMUSG00000020361	OMA01653	Yes	No	No	No	NA	NA	NA	NA	NA	Yes	Hspa4 heat shock protein 4	heat shock 70 kDa protein 4	NA	NA
ENSMUSG00000020362	OMA08459	No	No	NA	NA	Yes	NA	NA	NA	NA	NA	Cnot6 CCR4-NOT transcription complex, subunit 6	NA	NA	NA
ENSMUSG00000020363	OMA02062	No	No	No	No	NA	No	Act:-1.07	No	No	NA	Gfpt2 glutamine fructose-6-phosphate transaminase 2	glutamine--fructose-6-phosphate aminotransferase	glutamine--fructose-6-phosphate aminotransferase	TPA: glucosamine--fructose-6-phosphate aminotransferase [isomerizing] 1 [Bos taurus]
ENSMUSG00000020364	OMA13679	Yes	No	No	No	NA	No	No	NA	NA	NA	Zfp354a zinc finger protein 354A	PREDICTED: oocyte zinc finger protein XlCOF22-like	zinc finger protein 696 isoform X2	NA
ENSMUSG00000020372	OMA05333	No	No	No	No	No	No	Act:-1.02	No	No	Yes	Rack1 receptor for activated C kinase 1	receptor of activated protein C kinase 1	guanine nucleotide-binding protein subunit beta-2-like 1	protein kinase C receptor [Rattus norvegicus]
ENSMUSG00000020374	OMA07322	No	No	Yes	No	NA	No	Act:-0.60	NA	NA	NA	Rasgef1c RasGEF domain family, member 1C	ras-GEF domain-containing family member 1B	ras-GEF domain-containing family member 1B isoform X4	NA
ENSMUSG00000020387	OMA03770	Yes	No	No	No	NA	NA	NA	NA	NA	NA	Jade2 jade family PHD finger 2	protein Jade-2	NA	NA
ENSMUSG00000020397	OMA11267	Yes	No	No	No	No	No	No	No	No	No	Med7 mediator complex subunit 7	mediator of RNA polymerase II transcription subunit 7	LOW QUALITY PROTEIN: mediator of RNA polymerase II transcription subunit 7	Mediator of RNA polymerase II transcription subunit 7 [Crassostrea gigas]
ENSMUSG00000020400	OMA11001	No	No	No	No	Yes	NA	NA	NA	NA	NA	Tnip1 TNFAIP3 interacting protein 1	TNFAIP3-interacting protein 1	NA	NA
ENSMUSG00000020405	OMA20829	No	No	No	Act:-2.19	Yes	NA	NA	NA	NA	NA	Fabp6 fatty acid binding protein 6, ileal (gastrotropin)	PREDICTED: gastrotropin	NA	NA
ENSMUSG00000020407	OMA10492	Yes	No	No	No	NA	No	No	NA	NA	NA	Upp1 uridine phosphorylase 1	uridine phosphorylase 1	uridine phosphorylase 2	NA
ENSMUSG00000020413	OMA11765	Yes	No	No	No	No	No	No	No	No	No	Hus1 HUS1 checkpoint clamp component	checkpoint protein HUS1	checkpoint protein HUS1 isoform X4	Checkpoint protein HUS1 [Oncorhynchus mykiss]
ENSMUSG00000020422	OMA02209	Yes	No	No	No	NA	NA	NA	NA	NA	NA	Tns3 tensin 3	PREDICTED: tensin-3	NA	NA
ENSMUSG00000020423	OMA19125	No	No	Yes	No	NA	NA	NA	NA	NA	NA	Btg2 B cell translocation gene 2, anti-proliferative	uncharacterized protein LOC394487	NA	NA
ENSMUSG00000020424	OMA10468	No	No	No	No	NA	No	Rep:1.27	NA	NA	NA	Gatsl3 GATS protein-like 3	GATS-like protein 3	cytosolic arginine sensor for mTORC1 subunit 2	NA
ENSMUSG00000020428	OMA06698	No	No	No	No	NA	NA	NA	No	Rep:1.63	NA	Gabra6 gamma-aminobutyric acid (GABA) A receptor, subunit alpha 6	PREDICTED: gamma-aminobutyric acid receptor subunit alpha-6	NA	cys-loop ligand-gated ion channel subunit [Tribolium castaneum]
ENSMUSG00000020430	OMA04187	No	No	No	No	No	No	Act:-0.89	No	No	No	Pes1 pescadillo ribosomal biogenesis factor 1	pescadillo homolog	pescadillo	mCG114599 [Mus musculus]
ENSMUSG00000020432	OMA18081	Yes	No	No	No	No	No	No	NA	NA	NA	Tcn2 transcobalamin 2	transcobalamin-2 precursor	uncharacterized protein CG3556	NA
ENSMUSG00000020437	OMA03073	No	No	No	Act:-1.00	NA	NA	NA	NA	NA	No	Myo1g myosin IG	PREDICTED: unconventional myosin-Id isoform X1	NA	NA
ENSMUSG00000020447	OMA01940	No	No	No	Rep:1.04	No	No	No	NA	NA	NA	Npc1l1 NPC1-like 1	PREDICTED: Niemann-Pick C1-like protein 1	NPC intracellular cholesterol transporter 1-like	NA
ENSMUSG00000020458	OMA10336	Yes	No	No	Act:-1.12	NA	NA	NA	NA	NA	NA	Rtn4 reticulon 4	reticulon-4	NA	NA
ENSMUSG00000020460	OMA08450	No	No	No	No	No	NA	NA	Yes	No	No	Rps27a ribosomal protein S27A	PREDICTED: polyubiquitin-B-like isoform X1	NA	polyubiquitin [Salmo salar]
ENSMUSG00000020464	OMA02145	Yes	No	No	No	NA	No	No	No	No	NA	Pnpt1 polyribonucleotide nucleotidyltransferase 1	polyribonucleotide nucleotidyltransferase 1, mitochondrial	polyribonucleotide nucleotidyltransferase 1, mitochondrial	polyribonucleotide nucleotidyltransferase 1 [Xenopus (Silurana) tropicalis]
ENSMUSG00000020467	OMA06474	No	No	No	No	NA	No	Act:-1.13	No	Act:-1.42	NA	Efemp1 epidermal growth factor-containing fibulin-like extracellular matrix protein 1	PREDICTED: EGF-containing fibulin-like extracellular matrix protein 1	latent-transforming growth factor beta-binding protein 2-like isoform X5	EGF domain-containing protein [Myxococcus stipitatus]
ENSMUSG00000020469	OMA14656	Yes	No	No	No	Yes	NA	NA	NA	NA	NA	Myl7 myosin, light polypeptide 7, regulatory	myosin regulatory light chain 2, atrial isoform	NA	NA
ENSMUSG00000020475	OMA09768	Yes	No	No	No	No	NA	NA	NA	NA	NA	Pgam2 phosphoglycerate mutase 2	phosphoglycerate mutase 2	NA	NA
ENSMUSG00000020476	OMA09177	No	No	No	No	NA	No	Act:-0.67	No	No	NA	Dbnl drebrin-like	drebrin-like protein	drebrin-like protein A	Drebrin-like protein [Acromyrmex echinatior]
ENSMUSG00000020484	OMA16084	No	No	Yes	No	NA	NA	NA	No	No	NA	Xbp1 X-box binding protein 1	X-box-binding protein 1	NA	X-box-binding protein 1 isoform 2 [Cricetulus griseus]
ENSMUSG00000020524	OMA00914	Yes	No	No	No	NA	No	No	Yes	No	NA	Gria1 glutamate receptor, ionotropic, AMPA1 (alpha 1)	PREDICTED: glutamate receptor 1 isoform X1	glutamate receptor 4	Glutamate [NMDA] receptor subunit 3B [Heterocephalus glaber]
ENSMUSG00000020525	OMA07086	No	No	No	No	Yes	No	Rep:0.75	No	No	NA	Ppm1d protein phosphatase 1D magnesium-dependent, delta isoform	PREDICTED: protein phosphatase 1D	probable protein phosphatase 2C 64	GG18522 [Drosophila erecta]
ENSMUSG00000020527	OMA03850	No	No	No	No	NA	No	Rep:0.55	No	No	NA	Myo19 myosin XIX	unconventional myosin-XIX	unconventional myosin-XIX	Novel protein containing IQ calmodulin-binding motif [Xenopus (Silurana) tropicalis]
ENSMUSG00000020532	OMA00078	No	No	No	No	Yes	No	Act:-1.38	No	No	No	Acaca acetyl-Coenzyme A carboxylase alpha	PREDICTED: acetyl-CoA carboxylase 1 isoform X1	acetyl-CoA carboxylase isoform X3	acetyl-CoA carboxylase [Gallus gallus]
ENSMUSG00000020536	OMA01519	No	No	Yes	No	Yes	No	No	No	No	NA	Llgl1 lethal giant larvae homolog 1 (Drosophila)	PREDICTED: lethal(2) giant larvae protein homolog 1 isoform X1	lethal(2) giant larvae protein homolog 2 isoform X9	Lethal(2) giant larvae protein homolog 2;
ENSMUSG00000020537	OMA04562	Yes	No	No	No	NA	No	No	No	No	NA	Drg2 developmentally regulated GTP binding protein 2	developmentally-regulated GTP-binding protein 2	developmentally-regulated GTP-binding protein 2	Developmentally-regulated GTP-binding protein 2 [Acromyrmex echinatior]
ENSMUSG00000020542	OMA03866	Yes	No	No	No	NA	NA	NA	NA	NA	No	Myocd myocardin	PREDICTED: myocardin isoform X1	NA	NA
ENSMUSG00000020545	OMA19586	Yes	No	No	No	Yes	Yes	No	No	No	NA	Lrrc72 leucine rich repeat containing 72	PREDICTED: leucine-rich repeat-containing protein 72 isoform X1	leucine-rich repeat-containing protein 72	leucine-rich repeat-containing protein 72 [Homo sapiens]
ENSMUSG00000020547	OMA04314	Yes	No	No	No	NA	No	No	NA	NA	NA	Bzw2 basic leucine zipper and W2 domains 2	PREDICTED: basic leucine zipper and W2 domain-containing protein 2	basic leucine zipper and W2 domain-containing protein 1	NA
ENSMUSG00000020553	OMA17105	Yes	No	NA	NA	No	No	No	No	No	No	Pctp phosphatidylcholine transfer protein	NA	phosphatidylcholine transfer protein	phosphatidylcholine transfer protein [Branchiostoma belcheri tsingtauense]
ENSMUSG00000020564	OMA02584	Yes	No	No	No	NA	NA	NA	NA	NA	NA	Atxn7l1 ataxin 7-like 1	PREDICTED: ataxin-7-like protein 1 isoform X1	NA	NA
ENSMUSG00000020571	OMA04908	No	No	No	No	No	No	Act:-1.77	Yes	No	NA	Pdia6 protein disulfide isomerase associated 6	protein disulfide-isomerase A6 precursor	protein disulfide-isomerase A6 homolog	Protein disulfide-isomerase A6 [Zootermopsis nevadensis]
ENSMUSG00000020572	OMA03313	No	No	No	No	NA	No	Rep:1.01	No	No	No	Nampt nicotinamide phosphoribosyltransferase	nicotinamide phosphoribosyltransferase	nicotinamide phosphoribosyltransferase-like	Nicotinamide phosphoribosyltransferase [Crassostrea gigas]
ENSMUSG00000020573	OMA00846	Yes	No	No	No	NA	NA	NA	NA	NA	NA	Pik3cg phosphatidylinositol-4,5-bisphosphate 3-kinase catalytic subunit gamma	phosphatidylinositol 4,5-bisphosphate 3-kinase catalytic subunit gamma isoform	NA	NA
ENSMUSG00000020576	OMA00261	Yes	No	No	No	NA	No	No	No	No	No	Nbas neuroblastoma amplified sequence	PREDICTED: neuroblastoma-amplified sequence	neuroblastoma-amplified sequence	neuroblastoma-amplified protein, isoform CRA_a [Homo sapiens]
ENSMUSG00000020577	OMA12580	No	No	No	No	No	No	Rep:0.54	Yes	No	No	Tspan13 tetraspanin 13	tetraspanin-13	tetraspanin-31 isoform X1	GA19512, isoform B [Drosophila pseudoobscura pseudoobscura]
ENSMUSG00000020583	OMA12821	No	Rep:1.44	No	Act:-5.12	No	NA	NA	NA	NA	NA	Matn3 matrilin 3	PREDICTED: matrilin-3	NA	NA
ENSMUSG00000020585	OMA11849	No	No	No	No	NA	No	Act:-1.02	No	No	NA	Laptm4a lysosomal-associated protein transmembrane 4A	lysosomal-associated transmembrane protein 4A	lysosomal-associated transmembrane protein 4B	lysosomal-associated transmembrane protein 4a [Ictalurus punctatus]
ENSMUSG00000020591	OMA28841	No	No	NA	NA	Yes	NA	NA	NA	NA	NA	Ntsr2 neurotensin receptor 2	NA	NA	NA
ENSMUSG00000020593	OMA02259	No	No	No	No	Yes	No	No	NA	NA	NA	Lpin1 lipin 1	phosphatidate phosphatase LPIN1	phosphatidate phosphatase LPIN3 isoform X1	NA
ENSMUSG00000020594	OMA00799	No	No	No	No	No	No	Rep:0.66	NA	NA	NA	Pum2 pumilio RNA-binding family member 2	PREDICTED: pumilio homolog 2 isoform X1	pumilio homolog 2 isoform X1	NA
ENSMUSG00000020598++	OMA00943	Yes	No	No	No	Yes	No	No	No	No	NA	Nrcam neuronal cell adhesion molecule	neuronal cell adhesion molecule precursor	neuronal cell adhesion molecule-like isoform X1	Hemicentin-1 [Heterocephalus glaber]
ENSMUSG00000020600	OMA23176	Yes	No	NA	NA	NA	No	No	NA	NA	NA	Slc7a15 solute carrier family 7 (cationic amino acid transporter, y+ system), member 15	NA	cystine/glutamate transporter	NA
ENSMUSG00000020601	OMA05980	No	No	Yes	No	No	NA	NA	Yes	No	NA	Trib2 tribbles pseudokinase 2	tribbles homolog 2	NA	PREDICTED: tribbles homolog 2 [Chelonia mydas]
ENSMUSG00000020608	OMA02188	No	No	No	No	No	No	Rep:0.53	No	No	No	Smc6 structural maintenance of chromosomes 6	PREDICTED: structural maintenance of chromosomes protein 6	structural maintenance of chromosomes protein 6 isoform X1	structural maintenance of chromosomes protein 6 [Xenopus laevis]
ENSMUSG00000020609	OMA00270	Yes	No	No	No	NA	NA	NA	NA	NA	NA	Apob apolipoprotein B	PREDICTED: apolipoprotein B-100	NA	NA
ENSMUSG00000020611	OMA05168	Yes	No	No	No	No	No	No	NA	NA	NA	Gna13 guanine nucleotide binding protein, alpha 13	guanine nucleotide-binding protein subunit alpha-13	guanine nucleotide-binding protein G(12) alpha subunit	NA
ENSMUSG00000020620	OMA03032	Yes	Rep:1.66	No	No	NA	No	No	NA	NA	NA	Abca8b ATP-binding cassette, sub-family A (ABC1), member 8b	PREDICTED: ATP-binding cassette sub-family A member 8-like	ATP-binding cassette sub-family A member 5 isoform X2	NA
ENSMUSG00000020621	OMA09408	Yes	No	No	No	No	No	No	No	No	No	Rdh14 retinol dehydrogenase 14 (all-trans and 9-cis)	retinol dehydrogenase 14	retinol dehydrogenase 13	Retinol dehydrogenase 13 [Crassostrea gigas]
ENSMUSG00000020622	OMA08878	Yes	Act:-7.65	No	No	NA	NA	NA	NA	NA	NA	Nt5c1b 5'-nucleotidase, cytosolic IB	cytosolic 5'-nucleotidase 1B	NA	NA
ENSMUSG00000020623	OMA06867	No	No	Yes	No	NA	No	Rep:0.59	No	No	NA	Map2k6 mitogen-activated protein kinase kinase 6	dual specificity mitogen-activated protein kinase kinase 6	dual specificity mitogen-activated protein kinase kinase 6	mitogen-activated protein kinase kinase 6
ENSMUSG00000020624	NA	Yes	Act:-7.88	NA	NA	NA	NA	NA	NA	NA	NA	4933434M16Rik RIKEN cDNA 4933434M16 gene	NA	NA	NA
ENSMUSG00000020629	OMA14035	No	No	No	Act:-1.28	NA	No	No	NA	NA	NA	Adi1 acireductone dioxygenase 1	1,2-dihydroxy-3-keto-5-methylthiopentene dioxygenase	LOW QUALITY PROTEIN: 1,2-dihydroxy-3-keto-5-methylthiopentene dioxygenase	NA
ENSMUSG00000020636	OMA11418	No	No	No	No	NA	No	No	No	Rep:1.52	No	Allc allantoicase	allantoicase	allantoicase	Allantoicase [Crassostrea gigas]
ENSMUSG00000020640	OMA00460	No	No	No	No	Yes	No	No	NA	NA	NA	Itsn2 intersectin 2	PREDICTED: intersectin-2	intersectin-1 isoform X2	NA
ENSMUSG00000020641	OMA08711	No	No	No	No	NA	NA	NA	No	Act:-1.23	No	Rsad2 radical S-adenosyl methionine domain containing 2	PREDICTED: radical S-adenosyl methionine domain-containing protein 2	NA	rCG62278 [Rattus norvegicus]
ENSMUSG00000020644	OMA16712	Yes	No	No	No	NA	NA	NA	No	No	NA	Id2 inhibitor of DNA binding 2	DNA-binding protein inhibitor ID-2	NA	DNA-binding protein inhibitor ID-4 [Danio rerio]
ENSMUSG00000020647	OMA01201	Yes	No	Yes	No	NA	NA	NA	NA	NA	NA	Ncoa1 nuclear receptor coactivator 1	nuclear receptor coactivator 1	NA	NA
ENSMUSG00000020651	OMA03569	No	No	No	No	No	No	Act:-2.75	NA	NA	No	Slc26a4 solute carrier family 26, member 4	pendrin	prestin-like	NA
ENSMUSG00000020654	OMA00832	Yes	No	No	No	NA	No	No	NA	NA	NA	Adcy3 adenylate cyclase 3	adenylate cyclase type 3	adenylate cyclase type 3-like	NA
ENSMUSG00000020656	OMA02959	No	No	Yes	No	Yes	NA	NA	Yes	No	NA	Grhl1 grainyhead-like 1 (Drosophila)	PREDICTED: grainyhead-like protein 1 homolog isoform X10	NA	Grainyhead-like protein 2 homolog
ENSMUSG00000020657	OMA11383	No	No	No	No	No	No	No	Yes	No	NA	Dnajc27 DnaJ heat shock protein family (Hsp40) member C27	PREDICTED: dnaJ homolog subfamily C member 27, partial	dnaJ homolog subfamily C member 27 isoform X1	DnaJ-like protein subfamily C member 27 [Crassostrea gigas]
ENSMUSG00000020661	OMA01270	Yes	No	Yes	No	NA	No	No	No	No	NA	Dnmt3a DNA methyltransferase 3A	PREDICTED: DNA (cytosine-5)-methyltransferase 3A isoform X1	DNA (cytosine-5)-methyltransferase 3A isoform X3	PREDICTED: DNA (cytosine-5)-methyltransferase 3A isoform X2 [Rattus norvegicus]
ENSMUSG00000020671	OMA12597	No	No	No	No	Yes	No	No	No	No	NA	Rab10 RAB10, member RAS oncogene family	ras-related protein Rab-10	ras-related protein Rab-10 isoform X1	ras-related protein rab-10 [Ictalurus furcatus]
ENSMUSG00000020672	OMA05318	No	No	No	No	Yes	NA	NA	NA	NA	NA	Sntg2 syntrophin, gamma 2	PREDICTED: gamma-2-syntrophin	NA	NA
ENSMUSG00000020673	OMA04403	No	No	No	No	Yes	NA	NA	No	No	NA	Tpo thyroid peroxidase	PREDICTED: thyroid peroxidase	NA	Peroxidasin homolog;
ENSMUSG00000020674	OMA00417	No	No	Yes	No	Yes	No	No	No	No	NA	Pxdn peroxidasin	peroxidasin precursor	peroxidasin homolog, partial	peroxidasin homolog precursor [Rattus norvegicus]
ENSMUSG00000020681	OMA01179	No	No	No	No	NA	No	No	No	Rep:1.32	No	Ace angiotensin I converting enzyme (peptidyl-dipeptidase A) 1	angiotensin-converting enzyme precursor	angiotensin-converting enzyme	Angiotensin-converting enzyme [Crassostrea gigas]
ENSMUSG00000020682	OMA10536	No	No	No	No	NA	No	No	Yes	No	NA	Mmp28 matrix metallopeptidase 28 (epilysin)	PREDICTED: matrix metalloproteinase-28 isoform X1	stromelysin-3-like	Matrilysin;
ENSMUSG00000020690	OMA26914	Yes	No	NA	NA	No	NA	NA	NA	NA	NA	Efcab3 EF-hand calcium binding domain 3	NA	NA	NA
ENSMUSG00000020691	OMA10014	Yes	No	No	No	NA	No	No	No	Rep:1.55	No	Mettl2 methyltransferase like 2	methyltransferase-like protein 2	methyltransferase-like protein 2	RecName: Full=Methyltransferase-like protein 2-A [Danio rerio]
ENSMUSG00000020695	OMA01135	No	No	Yes	No	NA	No	No	Yes	No	NA	Mrc2 mannose receptor, C type 2	C-type mannose receptor 2 precursor	macrophage mannose receptor 1	Macrophage mannose receptor 1 [Crassostrea gigas]
ENSMUSG00000020696	OMA13277	Yes	No	No	No	NA	No	No	NA	NA	NA	Rffl ring finger and FYVE like domain containing protein	E3 ubiquitin-protein ligase rififylin	E3 ubiquitin-protein ligase RNF34	NA
ENSMUSG00000020697	OMA01925	No	No	No	No	NA	No	Rep:1.54	Yes	No	No	Lig3 ligase III, DNA, ATP-dependent	DNA ligase 3	DNA ligase 3	ligase III, DNA, ATP-dependent [Homo sapiens]
ENSMUSG00000020698	OMA04395	No	No	No	No	No	No	Act:-0.80	No	No	No	Cct6b chaperonin containing Tcp1, subunit 6b (zeta)	T-complex protein 1 subunit zeta	T-complex protein 1 subunit zeta	chaperonin containing T-complex polypeptide subunit zeta [Haliotis discus hannai]
ENSMUSG00000020704	OMA03983	Yes	No	No	No	No	No	Act:-1.08	No	No	NA	Asic2 acid-sensing (proton-gated) ion channel 2	PREDICTED: acid-sensing ion channel 2 isoform X1	acid-sensing ion channel 1A	Amiloride-sensitive cation channel 2-A, neuronal [Dicentrarchus labrax]
ENSMUSG00000020716	OMA00054	Yes	No	No	No	No	No	No	No	No	No	Nf1 neurofibromin 1	PREDICTED: neurofibromin isoform X1	neurofibromin	PREDICTED: neurofibromin isoform X2 [Microplitis demolitor]
ENSMUSG00000020720	OMA07457	No	No	NA	NA	Yes	No	No	No	No	No	Psmd12 proteasome (prosome, macropain) 26S subunit, non-ATPase, 12	NA	26S proteasome non-ATPase regulatory subunit 12	26S proteasome non-ATPase regulatory subunit 12 [Crassostrea gigas]
ENSMUSG00000020721	OMA00384	No	No	No	Rep:1.05	NA	No	No	No	No	NA	Helz helicase with zinc finger domain	probable helicase with zinc finger domain	probable helicase with zinc finger domain isoform X3	Putative helicase with zinc finger domain [Crassostrea gigas]
ENSMUSG00000020728	OMA07235	No	No	No	No	No	No	Rep:0.74	No	No	NA	Cep112 centrosomal protein 112	PREDICTED: axin-2 isoform X1	centrosomal protein of 112 kDa isoform X1	Coiled-coil domain-containing protein 46 [Crassostrea gigas]
ENSMUSG00000020734	OMA02328	No	Act:-8.20	No	No	NA	NA	NA	NA	NA	NA	Grin2c glutamate receptor, ionotropic, NMDA2C (epsilon 3)	PREDICTED: glutamate receptor ionotropic, NMDA 2C isoform X1	NA	NA
ENSMUSG00000020737	OMA27199	No	No	Yes	No	NA	NA	NA	NA	NA	NA	Jpt1 Jupiter microtubule associated homolog 1	hematological and neurological expressed 1-like protein	NA	NA
ENSMUSG00000020739	OMA03783	No	No	No	No	No	No	No	Yes	No	No	Nup85 nucleoporin 85	nuclear pore complex protein Nup85	nuclear pore complex protein Nup85	nuclear pore complex protein Nup85 [Danio rerio]
ENSMUSG00000020741	OMA00556	No	No	Yes	No	Yes	No	Act:-1.31	No	No	Yes	Cluh clustered mitochondria (cluA/CLU1) homolog	clustered mitochondria protein homolog	clustered mitochondria protein homolog	Putative eukaryotic translation initiation factor 3 subunit [Camponotus floridanus]
ENSMUSG00000020745	OMA03315	No	No	No	No	No	No	No	No	No	Yes	Pafah1b1 platelet-activating factor acetylhydrolase, isoform 1b, subunit 1	lissencephaly-1 homolog	lissencephaly-1 homolog isoform X2	lissencephaly-1-like protein A [Ictalurus punctatus]
ENSMUSG00000020747	OMA00897	No	No	No	No	No	No	No	Yes	No	No	Tmem94 transmembrane protein 94	PREDICTED: transmembrane protein 94	transmembrane protein 94 isoform X1	Putative protein KIAA0195 [Myotis brandtii]
ENSMUSG00000020752	OMA04596	No	No	No	No	NA	No	Rep:0.92	No	No	NA	Recql5 RecQ protein-like 5	ATP-dependent DNA helicase Q5	ATP-dependent DNA helicase Q5	ATP-dependent DNA helicase Q5 [Columba livia]
ENSMUSG00000020755	OMA08925	No	No	Yes	No	NA	No	No	Yes	No	No	Sap30bp SAP30 binding protein	PREDICTED: SAP30-binding protein	SAP30-binding protein-like	SAP30-binding protein;
ENSMUSG00000020758	OMA00700	No	No	No	No	Yes	NA	NA	NA	NA	NA	Itgb4 integrin beta 4	PREDICTED: integrin beta-4 isoform X1	NA	NA
ENSMUSG00000020770	OMA01965	No	No	No	No	NA	Yes	No	No	No	NA	Unk unkempt family zinc finger	RING finger protein unkempt homolog	putative E3 ubiquitin-protein ligase UNKL isoform X2	RING finger protein unkempt-like protein [Zootermopsis nevadensis]
ENSMUSG00000020774	OMA10655	No	Act:-8.24	No	No	No	NA	NA	NA	NA	NA	Aspa aspartoacylase	aspartoacylase	NA	NA
ENSMUSG00000020776	OMA05765	No	No	No	No	NA	No	Rep:0.53	No	No	NA	Fbf1 Fas (TNFRSF6) binding factor 1	PREDICTED: fas-binding factor 1 isoform X1	fas-binding factor 1 homolog	Fas-binding factor 1 homolog;
ENSMUSG00000020777	OMA03330	No	No	No	No	No	No	No	No	No	Yes	Acox1 acyl-Coenzyme A oxidase 1, palmitoyl	peroxisomal acyl-coenzyme A oxidase 1	peroxisomal acyl-coenzyme A oxidase 1 isoform X3	peroxisomal acyl-coenzyme A oxidase 1 [Danio rerio]
ENSMUSG00000020782	OMA01701	No	No	No	No	Yes	No	No	NA	NA	NA	Llgl2 lethal giant larvae homolog 2 (Drosophila)	lethal(2) giant larvae protein homolog 2	lethal(2) giant larvae protein homolog 2 isoform X9	NA
ENSMUSG00000020787	OMA09612	No	No	Yes	No	NA	NA	NA	NA	NA	NA	P2rx1 purinergic receptor P2X, ligand-gated ion channel, 1	PREDICTED: P2X purinoceptor 1	NA	NA
ENSMUSG00000020790	OMA00547	No	No	No	No	No	No	No	Yes	No	No	Ankfy1 ankyrin repeat and FYVE domain containing 1	rabankyrin-5	rabankyrin-5	Ankyrin repeat and FYVE domain-containing protein 1 [Fukomys damarensis]
ENSMUSG00000020792	OMA03137	Yes	No	Yes	No	No	No	No	No	Act:-1.14	No	Exoc7 exocyst complex component 7	exocyst complex component 7	exocyst complex component 7 isoform X1	exocyst complex component 7 [Rattus norvegicus]
ENSMUSG00000020793	OMA09673	No	No	No	Rep:1.15	NA	NA	NA	No	No	NA	Galr2 galanin receptor 2	PREDICTED: galanin receptor type 2	NA	tachykinin-like peptides receptor 86C [Tribolium castaneum]
ENSMUSG00000020794	OMA15109	No	No	No	No	Yes	No	No	No	No	Yes	Ube2g1 ubiquitin-conjugating enzyme E2G 1	ubiquitin-conjugating enzyme E2 G1	probable ubiquitin-conjugating enzyme E2 7 isoform X1	ubiquitin-conjugating enzyme E2, putative [Phytophthora infestans T30-4]
ENSMUSG00000020798	OMA19958	No	No	NA	NA	Yes	NA	NA	NA	NA	NA	Spns3 spinster homolog 3	NA	NA	NA
ENSMUSG00000020806	OMA02261	No	No	Yes	No	NA	NA	NA	NA	NA	NA	Rhbdf2 rhomboid 5 homolog 2	inactive rhomboid protein 2	NA	NA
ENSMUSG00000020818	OMA06719	No	No	No	No	No	No	No	No	No	Yes	Mfsd11 major facilitator superfamily domain containing 11	UNC93-like protein MFSD11	UNC93-like protein MFSD11	UNC93-like MFSD11 [Mesitornis unicolor]
ENSMUSG00000020823	OMA01791	Yes	No	No	No	No	No	Rep:0.57	Yes	No	No	Sec14l1 SEC14-like lipid binding 1	SEC14-like protein 1	SEC14-like protein 1 isoform X1	SEC14L1 protein [Homo sapiens]
ENSMUSG00000020826	OMA01832	No	No	No	No	NA	No	Rep:0.80	NA	NA	NA	Nos2 nitric oxide synthase 2, inducible	PREDICTED: nitric oxide synthase, inducible isoform X1	nitric oxide synthase, brain isoform X3	NA
ENSMUSG00000020834	OMA14954	No	No	No	No	NA	Yes	No	NA	NA	NA	Dhrs13 dehydrogenase/reductase (SDR family) member 13	dehydrogenase/reductase SDR family member 13	retinol dehydrogenase 12	NA
ENSMUSG00000020840	OMA05639	No	No	No	No	NA	No	Act:-0.75	No	No	No	Blmh bleomycin hydrolase	bleomycin hydrolase	bleomycin hydrolase-like	bleomycin hydrolase [Rattus norvegicus]
ENSMUSG00000020844++	OMA05656	Yes	No	No	No	NA	No	No	Yes	No	NA	Nxn nucleoredoxin	nucleoredoxin	nucleoredoxin	nucleoredoxin [Xenopus (Silurana) tropicalis]
ENSMUSG00000020850	OMA00053	No	No	No	No	NA	No	Rep:0.77	No	No	No	Prpf8 pre-mRNA processing factor 8	PREDICTED: pre-mRNA-processing-splicing factor 8	pre-mRNA-processing-splicing factor 8	PREDICTED: pre-mRNA-processing-splicing factor 8 [Calypte anna]
ENSMUSG00000020866	OMA00287	No	No	No	No	Yes	No	No	Yes	No	NA	Cacna1g calcium channel, voltage-dependent, T type, alpha 1G subunit	PREDICTED: voltage-dependent T-type calcium channel subunit alpha-1G isoform X1	voltage-dependent T-type calcium channel subunit alpha-1I isoform X6	NveCav3a
ENSMUSG00000020873	OMA07754	Yes	No	No	No	Yes	No	No	No	No	NA	Slc35b1 solute carrier family 35, member B1	solute carrier family 35 member B1	solute carrier family 35 member B1	Solute carrier family 35 member B1 [Crassostrea gigas]
ENSMUSG00000020882	OMA04086	No	No	No	Act:-1.02	NA	NA	NA	NA	NA	NA	Cacnb1 calcium channel, voltage-dependent, beta 1 subunit	voltage-dependent L-type calcium channel subunit beta-1	NA	NA
ENSMUSG00000020883	OMA03538	No	No	No	No	No	No	Act:-1.15	No	No	No	Fbxl20 F-box and leucine-rich repeat protein 20	PREDICTED: F-box/LRR-repeat protein 20 isoform X1	F-box/LRR-repeat protein 20	fbxl20, putative [Ixodes scapularis]
ENSMUSG00000020888	OMA02677	No	No	No	No	NA	NA	NA	Yes	No	NA	Dvl2 dishevelled segment polarity protein 2	segment polarity protein dishevelled homolog DVL-2	NA	Segment polarity protein dishevelled-like DVL-3 [Exaiptasia pallida]
ENSMUSG00000020889	OMA06584	Yes	No	No	No	NA	No	No	NA	NA	NA	Nr1d1 nuclear receptor subfamily 1, group D, member 1	nuclear receptor subfamily 1 group D member 1	nuclear receptor subfamily 1 group D member 1	NA
ENSMUSG00000020892	OMA08208	No	No	No	No	Yes	NA	NA	No	No	NA	Aloxe3 arachidonate lipoxygenase 3	PREDICTED: hydroperoxide isomerase ALOXE3-like	NA	11R-lipoxygenase [Gersemia fruticosa]
ENSMUSG00000020900	OMA00575	No	No	No	Rep:1.03	NA	No	Act:-0.60	NA	NA	NA	Myh10 myosin, heavy polypeptide 10, non-muscle	PREDICTED: LOW QUALITY PROTEIN: myosin-10	myosin-10 isoform X2	NA
ENSMUSG00000020902	OMA09411	No	No	NA	NA	Yes	No	No	Yes	No	NA	Ntn1 netrin 1	NA	netrin-1-like	Ntn1b protein [Danio rerio]
ENSMUSG00000020903	OMA14312	Yes	No	No	No	No	NA	NA	No	No	NA	Stx8 syntaxin 8	syntaxin-8	NA	syntaxin 8 [Xenopus (Silurana) tropicalis]
ENSMUSG00000020911	OMA08404	Yes	No	Yes	No	NA	NA	NA	NA	NA	NA	Krt19 keratin 19	keratin 19	NA	NA
ENSMUSG00000020917	OMA00519	No	No	No	No	No	No	Act:-1.85	Yes	No	Yes	Acly ATP citrate lyase	ATP-citrate synthase	ATP-citrate synthase isoform X1	ACLY variant protein [Homo sapiens]
ENSMUSG00000020919	OMA01403	No	No	No	No	Yes	No	No	No	No	No	Stat5b signal transducer and activator of transcription 5B	PREDICTED: signal transducer and activator of transcription 5B isoform X1	signal transducer and activator of transcription 5B isoform X3	signal transducer and activator of transcription [Fenneropenaeus chinensis]
ENSMUSG00000020923	OMA02701	No	No	No	No	No	No	Rep:0.58	No	No	NA	Ubtf upstream binding transcription factor, RNA polymerase I	PREDICTED: nucleolar transcription factor 1 isoform X1	nucleolar transcription factor 1-A isoform X2	Nucleolar transcription factor 1 [Salmo salar]
ENSMUSG00000020925	OMA16308	No	No	No	No	NA	No	Rep:0.61	No	No	No	Ccdc43 coiled-coil domain containing 43	coiled-coil domain-containing protein 43	coiled-coil domain-containing protein 43	GH13644 [Drosophila grimshawi]
ENSMUSG00000020929	OMA00601	No	No	No	No	No	No	Rep:0.49	No	No	No	Eftud2 elongation factor Tu GTP binding domain containing 2	116 kDa U5 small nuclear ribonucleoprotein component	116 kDa U5 small nuclear ribonucleoprotein component	116 kDa U5 small nuclear ribonucleoprotein component [Acanthisitta chloris]
ENSMUSG00000020936	OMA04168	No	No	No	No	NA	No	Act:-0.94	No	No	NA	Nmt1 N-myristoyltransferase 1	PREDICTED: glycylpeptide N-tetradecanoyltransferase 1	glycylpeptide N-tetradecanoyltransferase 2	Glycylpeptide N-tetradecanoyltransferase 2 [Myotis brandtii]
ENSMUSG00000020937	OMA04575	No	No	No	No	Yes	No	No	NA	NA	NA	Plcd3 phospholipase C, delta 3	PREDICTED: 1-phosphatidylinositol 4,5-bisphosphate phosphodiesterase delta-3	1-phosphatidylinositol 4,5-bisphosphate phosphodiesterase delta-4 isoform X6	NA
ENSMUSG00000020941	OMA09261	No	No	No	Rep:1.42	No	NA	NA	NA	NA	NA	Map3k14 mitogen-activated protein kinase kinase kinase 14	PREDICTED: mitogen-activated protein kinase kinase kinase 14 isoform X1	NA	NA
ENSMUSG00000020949	OMA12037	No	No	No	No	No	NA	NA	No	Rep:1.42	NA	Fkbp3 FK506 binding protein 3	peptidyl-prolyl cis-trans isomerase FKBP3	NA	peptidyl-prolyl cis-trans isomerase FKBP3 isoform 2 [Danio rerio]
ENSMUSG00000020953	OMA05653	No	No	No	Act:-1.94	NA	NA	NA	No	No	NA	Coch cochlin	PREDICTED: cochlin	NA	cochlin precursor [Cavia porcellus]
ENSMUSG00000020986	OMA01076	Yes	No	No	No	No	NA	NA	No	No	No	Sec23a SEC23 homolog A, COPII coat complex component	protein transport protein Sec23A	NA	Chain A, Crystal Structure Of The Human Sec23a24A HETERODIMER, Complexed With The Snare Protein Sec22b
ENSMUSG00000020990	OMA06666	Yes	No	No	No	No	No	Rep:0.85	No	No	NA	Cdkl1 cyclin-dependent kinase-like 1 (CDC2-related kinase)	PREDICTED: cyclin-dependent kinase-like 1	cyclin-dependent kinase-like 1	PREDICTED: cyclin-dependent kinase-like 4 [Cricetulus griseus]
ENSMUSG00000021003	OMA04613	Yes	No	No	No	No	No	No	NA	NA	NA	Galc galactosylceramidase	galactocerebrosidase precursor	galactocerebrosidase isoform X2	NA
ENSMUSG00000021009	OMA00804	No	No	Yes	No	No	No	No	NA	NA	NA	Ptpn21 protein tyrosine phosphatase, non-receptor type 21	tyrosine-protein phosphatase non-receptor type 21	tyrosine-protein phosphatase non-receptor type 21	NA
ENSMUSG00000021010	OMA01808	Yes	No	No	No	Yes	No	No	NA	NA	NA	Npas3 neuronal PAS domain protein 3	neuronal PAS domain-containing protein 3	neuronal PAS domain-containing protein 3	NA
ENSMUSG00000021013	OMA04353	No	No	Yes	No	No	No	No	No	Act:-1.34	NA	Ttc8 tetratricopeptide repeat domain 8	PREDICTED: tetratricopeptide repeat protein 8	tetratricopeptide repeat protein 8	Tetratricopeptide repeat protein 8;
ENSMUSG00000021022	OMA04308	No	No	No	No	No	No	Rep:0.65	No	No	NA	Ppp2r3c protein phosphatase 2, regulatory subunit B'', gamma	serine/threonine-protein phosphatase 2A regulatory subunit B'' subunit gamma	serine/threonine-protein phosphatase 2A regulatory subunit B'' subunit gamma	PREDICTED: serine/threonine-protein phosphatase 2A regulatory subunit B'' subunit gamma isoform X1 [Cricetulus griseus]
ENSMUSG00000021025	OMA13296	No	No	No	No	NA	No	Rep:0.90	No	No	NA	Nfkbia nuclear factor of kappa light polypeptide gene enhancer in B cells inhibitor, alpha	NF-kappa-B inhibitor alpha	NF-kappa-B inhibitor epsilon	nuclear factor kappa-B [Saccoglossus kowalevskii]
ENSMUSG00000021028	OMA14438	No	No	Yes	No	No	No	No	Yes	No	NA	Mbip MAP3K12 binding inhibitory protein 1	MAP3K12-binding inhibitory protein 1	MAP3K12-binding inhibitory protein 1 isoform X1	MAP3K12-binding inhibitory protein 1 [Pteropus alecto]
ENSMUSG00000021033	OMA14171	No	No	No	No	No	No	No	Yes	No	No	Gstz1 glutathione transferase zeta 1 (maleylacetoacetate isomerase)	PREDICTED: maleylacetoacetate isomerase isoform X1	maleylacetoacetate isomerase isoform X2	maleylacetoacetate isomerase [Capsaspora owczarzaki ATCC 30864]
ENSMUSG00000021036	OMA03307	No	No	Yes	No	NA	No	No	No	No	No	Sptlc2 serine palmitoyltransferase, long chain base subunit 2	PREDICTED: serine palmitoyltransferase 2	serine palmitoyltransferase 2	serine palmitoyltransferase 2 [Gallus gallus]
ENSMUSG00000021037	OMA09364	No	No	No	No	NA	No	No	No	Rep:1.09	No	Ahsa1 AHA1, activator of heat shock protein ATPase 1	activator of 90 kDa heat shock protein ATPase homolog 1	activator of 90 kDa heat shock protein ATPase homolog 1	activator of 90 kDa heat shock protein ATPase homolog 1 [Pongo abelii]
ENSMUSG00000021040	OMA24187	No	No	No	No	NA	No	Act:-0.75	NA	NA	NA	Slirp SRA stem-loop interacting RNA binding protein	PREDICTED: SRA stem-loop-interacting RNA-binding protein, mitochondrial	SRA stem-loop-interacting RNA-binding protein, mitochondrial-like	NA
ENSMUSG00000021047	OMA02654	Yes	No	Yes	No	NA	No	No	Yes	No	NA	Nova1 neuro-oncological ventral antigen 1	RNA-binding protein Nova-1	RNA-binding protein Nova-2-like, partial	putative KH-domain containing protein [Medicago truncatula]
ENSMUSG00000021051	OMA02566	No	No	No	No	No	No	Rep:0.73	No	No	NA	Ppp2r5e protein phosphatase 2, regulatory subunit B', epsilon	serine/threonine-protein phosphatase 2A 56 kDa regulatory subunit epsilon isoform	serine/threonine-protein phosphatase 2A 56 kDa regulatory subunit epsilon isoform isoform X1	serine threonine-protein phosphatase 2a 56 kda regulatory subunit epsilon isoform [Ascaris suum]
ENSMUSG00000021056	OMA19369	No	Act:-7.79	Yes	No	NA	NA	NA	NA	NA	NA	Tex21 testis expressed gene 21	PREDICTED: coiled-coil domain-containing protein 170-like	NA	NA
ENSMUSG00000021062	OMA10843	No	No	No	No	NA	No	No	No	No	NA	Rab15 RAB15, member RAS oncogene family	ras-related protein Rab-15	ras-related protein Rab-15	ras-related GTP binding protein possessing GTPase activity [Oryza sativa]
ENSMUSG00000021065	OMA02273	No	No	No	No	No	Yes	No	No	No	NA	Fut8 fucosyltransferase 8	alpha-(1,6)-fucosyltransferase	alpha-(1,6)-fucosyltransferase	Alpha-(1,6)-fucosyltransferase [Zootermopsis nevadensis]
ENSMUSG00000021067	OMA06425	No	No	No	No	No	No	Rep:0.79	No	No	NA	Sav1 salvador family WW domain containing 1	protein salvador homolog 1	mediator of RNA polymerase II transcription subunit 12 isoform X1	Protein salvador homolog 1;
ENSMUSG00000021068	OMA01769	Yes	No	Yes	Rep:1.01	NA	NA	NA	No	No	NA	Nin ninein	PREDICTED: ninein isoform X1	NA	Girdin;
ENSMUSG00000021087	OMA07534	No	No	No	No	Yes	No	Rep:0.51	No	No	NA	Rtn1 reticulon 1	reticulon-1	reticulon-1-A isoform X2	reticulon-like protein [Saccoglossus kowalevskii]
ENSMUSG00000021094	OMA12840	No	No	No	No	NA	No	No	NA	NA	Yes	Dhrs7 dehydrogenase/reductase (SDR family) member 7	dehydrogenase/reductase SDR family member 7	dehydrogenase/reductase SDR family member 7	NA
ENSMUSG00000021096	OMA04815	No	No	No	No	No	No	Rep:0.75	No	No	NA	Ppm1a protein phosphatase 1A, magnesium dependent, alpha isoform	protein phosphatase 1A	protein phosphatase 1B isoform X3	Protein phosphatase 1B [Zootermopsis nevadensis]
ENSMUSG00000021097	OMA08817	Yes	No	No	No	NA	NA	NA	NA	NA	NA	Clmn calmin	PREDICTED: calmin	NA	NA
ENSMUSG00000021101	NA	No	No	NA	NA	NA	NA	NA	NA	NA	NA	4930408O17Rik RIKEN cDNA 4930408O17 gene	NA	NA	NA
ENSMUSG00000021103	OMA11054	No	No	Yes	No	NA	No	No	No	No	No	Mnat1 menage a trois 1	CDK-activating kinase assembly factor MAT1	CDK-activating kinase assembly factor MAT1	CDK-activating kinase assembly factor p36/MAT1 [Mus musculus]
ENSMUSG00000021108	OMA02744	No	Act:-1.47	No	No	NA	NA	NA	NA	NA	NA	Prkch protein kinase C, eta	PREDICTED: protein kinase C eta type	NA	NA
ENSMUSG00000021109	OMA07257	Yes	No	No	No	Yes	No	No	No	No	NA	Hif1a hypoxia inducible factor 1, alpha subunit	hypoxia-inducible factor 1-alpha	hypoxia-inducible factor 1-alpha	hypoxia inducible factor [Aurelia sp. 1 GW-2014]
ENSMUSG00000021112	OMA02024	No	No	No	No	No	No	No	Yes	No	No	Mpp5 membrane protein, palmitoylated 5 (MAGUK p55 subfamily member 5)	PREDICTED: MAGUK p55 subfamily member 5	MAGUK p55 subfamily member 5 isoform X2	membrane protein, palmitoylated 5 (MAGUK p55 subfamily member 5) [Xenopus laevis]
ENSMUSG00000021114	OMA08981	No	No	No	No	NA	No	No	No	Act:-1.16	No	Atp6v1d ATPase, H+ transporting, lysosomal V1 subunit D	V-type proton ATPase subunit D	V-type proton ATPase subunit D	RecName: Full=V-type proton ATPase subunit D; Short=V-ATPase subunit D; AltName: Full=Vacuolar proton pump subunit D [Suberites domuncula]
ENSMUSG00000021115	OMA07865	No	No	Yes	No	No	No	No	No	No	NA	Vrk1 vaccinia related kinase 1	serine/threonine-protein kinase VRK1	serine/threonine-protein kinase VRK1	serine/threonine-protein kinase VRK1 isoform c [Mus musculus]
ENSMUSG00000021118	OMA24552	No	No	NA	NA	Yes	NA	NA	NA	NA	NA	Plek2 pleckstrin 2	NA	NA	NA
ENSMUSG00000021123	OMA15068	No	No	NA	NA	No	No	No	No	No	Yes	Rdh12 retinol dehydrogenase 12	NA	retinol dehydrogenase 11	Retinol dehydrogenase 13 [Crassostrea gigas]
ENSMUSG00000021127	OMA08532	No	No	Yes	No	NA	No	No	NA	NA	NA	Zfp36l1 zinc finger protein 36, C3H type-like 1	zinc finger protein 36, C3H1 type-like 1	mRNA decay activator protein ZFP36L1	NA
ENSMUSG00000021135	OMA16313	No	No	Yes	No	Yes	No	Act:-1.02	NA	NA	NA	Slc10a1 solute carrier family 10 (sodium/bile acid cotransporter family), member 1	PREDICTED: sodium/bile acid cotransporter	ileal sodium/bile acid cotransporter	NA
ENSMUSG00000021136	OMA04764	No	No	No	No	Yes	No	Rep:0.49	NA	NA	NA	Smoc1 SPARC related modular calcium binding 1	SPARC-related modular calcium-binding protein 1 precursor	SPARC-related modular calcium-binding protein 1 isoform X3	NA
ENSMUSG00000021139	OMA24708	Yes	No	NA	NA	No	NA	NA	NA	NA	NA	Gm20498 predicted gene 20498	NA	NA	NA
ENSMUSG00000021140	OMA00129	No	No	No	No	Yes	No	No	Yes	No	No	Pcnx pecanex homolog (Drosophila)	PREDICTED: pecanex-like protein 1 isoform X1	pecanex-like protein 1	Pecanex-like protein 1 [Zootermopsis nevadensis]
ENSMUSG00000021143	OMA01250	No	No	Yes	No	Yes	No	No	No	No	NA	Pacs2 phosphofurin acidic cluster sorting protein 2	PREDICTED: phosphofurin acidic cluster sorting protein 2 isoform X1	phosphofurin acidic cluster sorting protein 2 isoform X4	phosphofurin acidic cluster sorting protein 2 isoform 2 [Mus musculus]
ENSMUSG00000021144	OMA01735	Yes	No	No	No	Yes	No	No	NA	NA	NA	Mta1 metastasis associated 1	metastasis-associated protein MTA1	metastasis-associated protein MTA3 isoform X2	NA
ENSMUSG00000021176++	OMA19816	Yes	No	No	No	No	No	No	No	No	NA	Efcab11 EF-hand calcium binding domain 11	EF-hand calcium-binding domain-containing protein 11	EF-hand calcium-binding domain-containing protein 11-like	EF-hand calcium binding domain 11 [Xenopus (Silurana) tropicalis]
ENSMUSG00000021177	OMA05601	No	No	No	No	No	No	No	No	No	Yes	Tdp1 tyrosyl-DNA phosphodiesterase 1	tyrosyl-DNA phosphodiesterase 1	tyrosyl-DNA phosphodiesterase 1	Tyrosyl-DNA phosphodiesterase 1 [Crassostrea gigas]
ENSMUSG00000021180	OMA01547	Yes	No	No	No	No	No	No	No	No	NA	Rps6ka5 ribosomal protein S6 kinase, polypeptide 5	PREDICTED: ribosomal protein S6 kinase alpha-5	ribosomal protein S6 kinase alpha-5	ribosomal protein S6 kinase alpha-5 [Bos taurus]
ENSMUSG00000021182	OMA00885	Yes	No	Yes	No	Yes	No	Rep:0.51	NA	NA	NA	Ccdc88c coiled-coil domain containing 88C	PREDICTED: protein Daple isoform X1	girdin isoform X4	NA
ENSMUSG00000021185	OMA07462	No	No	No	No	Yes	No	No	No	Act:-1.34	NA	9030617O03Rik RIKEN cDNA 9030617O03 gene	D-glutamate cyclase, mitochondrial	D-glutamate cyclase, mitochondrial	UPF0317 protein C14orf159 homolog, mitochondrial;
ENSMUSG00000021200	OMA05471	No	No	No	No	Yes	No	No	NA	NA	NA	Asb2 ankyrin repeat and SOCS box-containing 2	PREDICTED: ankyrin repeat and SOCS box protein 2 isoform X1	ankyrin repeat domain-containing protein 50-like	NA
ENSMUSG00000021207	OMA12863	Yes	No	No	No	No	NA	NA	NA	NA	NA	Akr1c21 aldo-keto reductase family 1, member C21	aldo-keto reductase family 1, member C4	NA	NA
ENSMUSG00000021209	OMA02126	Yes	No	No	No	No	No	Rep:0.74	No	No	NA	Ppp4r4 protein phosphatase 4, regulatory subunit 4	PREDICTED: serine/threonine-protein phosphatase 4 regulatory subunit 4	serine/threonine-protein phosphatase 4 regulatory subunit 4 isoform X7	Serine/threonine-protein phosphatase 4 regulatory subunit 4 [Columba livia]
ENSMUSG00000021211	OMA12201	Yes	No	No	Act:-1.17	NA	NA	NA	NA	NA	NA	Akr1c12 aldo-keto reductase family 1, member C12	aldo-keto reductase family 1, member C2	NA	NA
ENSMUSG00000021213	OMA14319	Yes	No	No	Act:-1.17	NA	NA	NA	NA	NA	NA	Akr1c13 aldo-keto reductase family 1, member C13	aldo-keto reductase family 1, member C2	NA	NA
ENSMUSG00000021215	OMA04368	No	No	No	No	Yes	No	No	NA	NA	NA	Net1 neuroepithelial cell transforming gene 1	neuroepithelial cell-transforming gene 1 protein	rho guanine nucleotide exchange factor 3 isoform X1	NA
ENSMUSG00000021218	OMA04598	Yes	No	No	No	NA	No	Rep:1.40	No	No	NA	Gdi2 guanosine diphosphate (GDP) dissociation inhibitor 2	rab GDP dissociation inhibitor beta	rab GDP dissociation inhibitor alpha	rab GDP dissociation inhibitor alpha [Danio rerio]
ENSMUSG00000021219	OMA03709	Yes	No	No	No	No	No	No	No	No	NA	Rgs6 regulator of G-protein signaling 6	PREDICTED: regulator of G-protein signaling 6 isoform X1	regulator of G-protein signaling 7 isoform X2	Regulator of G-protein signaling 7 [Crassostrea gigas]
ENSMUSG00000021224	OMA04508	Yes	No	No	No	No	No	No	NA	NA	NA	Numb numb homolog (Drosophila)	protein numb homolog	protein numb isoform X3	NA
ENSMUSG00000021228	OMA10784	No	No	No	Act:-1.19	No	No	No	NA	NA	NA	Acot3 acyl-CoA thioesterase 3	acyl-coenzyme A thioesterase 2, mitochondrial	bile acid-CoA:amino acid N-acyltransferase isoform X2	NA
ENSMUSG00000021240	OMA05861	Yes	No	No	No	No	Yes	No	No	No	Yes	Abcd4 ATP-binding cassette, sub-family D (ALD), member 4	PREDICTED: ATP-binding cassette sub-family D member 4 isoform X1	ATP-binding cassette sub-family D member 4	ATP-binding cassette sub-family D member 4 [Bos mutus]
ENSMUSG00000021250	OMA10341	Yes	No	No	No	NA	NA	NA	NA	NA	NA	Fos FBJ osteosarcoma oncogene	proto-oncogene c-Fos	NA	NA
ENSMUSG00000021255	OMA20609	No	No	NA	NA	NA	NA	NA	Yes	No	NA	Esrrb estrogen related receptor, beta	NA	NA	retinoic acid receptor RXR-alpha-B-like [Exaiptasia pallida]
ENSMUSG00000021258	OMA03246	No	No	No	No	NA	No	Rep:0.46	No	No	No	Ccnk cyclin K	cyclin-K	cyclin-K	Cyclin-K;
ENSMUSG00000021262	OMA05900	No	No	No	No	NA	No	Act:-0.54	No	No	NA	Evl Ena-vasodilator stimulated phosphoprotein	ena/VASP-like protein	protein enabled homolog isoform X8	Vasodilator-stimulated phosphoprotein [Crassostrea gigas]
ENSMUSG00000021265	OMA10090	No	No	No	No	No	No	Rep:0.50	No	No	No	Slc25a29 solute carrier family 25 (mitochondrial carrier, palmitoylcarnitine transporter), member 29	mitochondrial basic amino acids transporter	mitochondrial basic amino acids transporter	Mitochondrial carnitine/acylcarnitine carrier protein CACL [Heterocephalus glaber]
ENSMUSG00000021268	NA	No	Act:-8.12	NA	NA	NA	NA	NA	NA	NA	NA	Meg3 maternally expressed 3	NA	NA	NA
ENSMUSG00000021270	OMA01298	No	No	No	No	Yes	NA	NA	NA	NA	NA	Hsp90aa1 heat shock protein 90, alpha (cytosolic), class A member 1	heat shock protein 90kDa alpha family class A member 1	NA	NA
ENSMUSG00000021271	OMA26326	No	No	NA	NA	NA	No	Rep:0.96	NA	NA	NA	Zfp839 zinc finger protein 839	NA	flocculation protein FLO11	NA
ENSMUSG00000021273	OMA07073	No	No	No	No	NA	No	No	NA	NA	Yes	Fdft1 farnesyl diphosphate farnesyl transferase 1	farnesyl-diphosphate farnesyltransferase 1	squalene synthase isoform X3	NA
ENSMUSG00000021276	OMA18861	Yes	No	No	No	No	No	No	No	No	NA	Cinp cyclin-dependent kinase 2 interacting protein	PREDICTED: cyclin-dependent kinase 2-interacting protein	cyclin-dependent kinase 2-interacting protein	cyclin-dependent kinase 2-interacting protein [Acyrthosiphon pisum]
ENSMUSG00000021278	OMA16673	No	Act:-7.59	No	No	NA	No	No	No	No	NA	Amn amnionless	PREDICTED: protein amnionless	protein amnionless	Im:7155895 protein [Danio rerio]
ENSMUSG00000021288	OMA02129	No	No	No	No	No	No	No	Yes	No	NA	Klc1 kinesin light chain 1	kinesin light chain 1	kinesin light chain isoform X10	GF10870 [Drosophila ananassae]
ENSMUSG00000021294	OMA01661	No	No	Yes	No	NA	NA	NA	NA	NA	NA	Kif26a kinesin family member 26A	PREDICTED: kinesin-like protein KIF26A isoform X1	NA	NA
ENSMUSG00000021301	OMA00416	No	No	No	No	Yes	Yes	Rep:0.77	Yes	No	NA	Hecw1 HECT, C2 and WW domain containing E3 ubiquitin protein ligase 1	E3 ubiquitin-protein ligase HECW1	E3 ubiquitin-protein ligase HECW2	E3 ubiquitin-protein ligase HECW1;
ENSMUSG00000021303	OMA19810	Yes	No	No	No	NA	NA	NA	NA	NA	NA	Gng4 guanine nucleotide binding protein (G protein), gamma 4	guanine nucleotide-binding protein G(I)/G(S)/G(O) subunit gamma-4	NA	NA
ENSMUSG00000021311	OMA00582	Yes	No	No	Rep:1.03	No	No	Act:-1.52	No	No	No	Mtr 5-methyltetrahydrofolate-homocysteine methyltransferase	PREDICTED: methionine synthase	methionine synthase	Methionine synthase [Crassostrea gigas]
ENSMUSG00000021313	NA	Yes	Act:-2.32	NA	NA	NA	NA	NA	NA	NA	NA	Ryr2 ryanodine receptor 2, cardiac	NA	NA	NA
ENSMUSG00000021314	OMA04556	Yes	Act:-1.55	No	No	Yes	No	Rep:0.50	NA	NA	Yes	Amph amphiphysin	amphiphysin	amphiphysin	NA
ENSMUSG00000021318	OMA00668	Yes	No	Yes	No	NA	NA	NA	NA	NA	NA	Gli3 GLI-Kruppel family member GLI3	PREDICTED: transcriptional activator GLI3 isoform X1	NA	NA
ENSMUSG00000021340	OMA09830	Yes	No	NA	NA	NA	No	No	No	No	Yes	Gpld1 glycosylphosphatidylinositol specific phospholipase D1	NA	phosphatidylinositol-glycan-specific phospholipase D	glycosylphosphatidylinositol specific phospholipase D1 [Capsaspora owczarzaki ATCC 30864]
ENSMUSG00000021359	OMA03748	No	No	Yes	No	No	NA	NA	NA	NA	NA	Tfap2a transcription factor AP-2, alpha	transcription factor AP-2-alpha	NA	NA
ENSMUSG00000021360	OMA09065	No	No	No	No	Yes	No	No	NA	NA	NA	Gcnt2 glucosaminyl (N-acetyl) transferase 2, I-branching enzyme	PREDICTED: N-acetyllactosaminide beta-1,6-N-acetylglucosaminyl-transferase	N-acetyllactosaminide beta-1,6-N-acetylglucosaminyl-transferase	NA
ENSMUSG00000021365	OMA05674	No	No	Yes	No	No	No	No	NA	NA	NA	Nedd9 neural precursor cell expressed, developmentally down-regulated gene 9	PREDICTED: enhancer of filamentation 1	breast cancer anti-estrogen resistance protein 1 isoform X1	NA
ENSMUSG00000021373	OMA06770	No	No	Yes	No	Yes	NA	NA	NA	NA	NA	Cap2 CAP, adenylate cyclase-associated protein, 2 (yeast)	PREDICTED: adenylyl cyclase-associated protein 2 isoform X1	NA	NA
ENSMUSG00000021375	OMA00323	No	No	Yes	No	NA	No	No	Yes	No	NA	Kif13a kinesin family member 13A	PREDICTED: kinesin-like protein KIF13A isoform X1	LOW QUALITY PROTEIN: kinesin-like protein KIF13A	kinesin-like protein KIF13A isoform d [Homo sapiens]
ENSMUSG00000021381	OMA12199	Yes	No	No	No	NA	No	No	NA	NA	NA	Barx1 BarH-like homeobox 1	PREDICTED: homeobox protein BarH-like 1 isoform X1	homeobox protein DLX-5	NA
ENSMUSG00000021388	OMA08042	No	No	No	No	No	NA	NA	NA	NA	Yes	Aspn asporin	PREDICTED: asporin	NA	NA
ENSMUSG00000021390	OMA13904	No	No	No	Act:-1.07	NA	NA	NA	NA	NA	NA	Ogn osteoglycin	PREDICTED: mimecan	NA	NA
ENSMUSG00000021400	OMA06456	No	No	No	No	NA	No	Rep:0.84	No	No	NA	Wrnip1 Werner helicase interacting protein 1	ATPase WRNIP1	ATPase WRNIP1	ATPase WRNIP1 [Myotis brandtii]
ENSMUSG00000021403	NA	Yes	No	NA	NA	NA	NA	NA	NA	NA	NA	Serpinb9b serine (or cysteine) peptidase inhibitor, clade B, member 9b	NA	NA	NA
ENSMUSG00000021411	OMA11260	Yes	No	No	No	NA	NA	NA	NA	NA	NA	Pxdc1 PX domain containing 1	PX domain-containing protein 1	NA	NA
ENSMUSG00000021413	OMA01052	Yes	No	No	No	No	No	No	No	No	NA	Prpf4b pre-mRNA processing factor 4B	PREDICTED: serine/threonine-protein kinase PRP4 homolog	serine/threonine-protein kinase PRP4 homolog	Serine/threonine-protein kinase PRP4 homolog;
ENSMUSG00000021416	OMA14794	Yes	No	No	Rep:1.78	NA	No	No	NA	NA	NA	Eci3 enoyl-Coenzyme A delta isomerase 3	enoyl-CoA delta isomerase 2, mitochondrial	enoyl-CoA delta isomerase 2, mitochondrial-like	NA
ENSMUSG00000021417	OMA10663	No	No	No	Rep:1.78	NA	No	No	No	No	No	Eci2 enoyl-Coenzyme A delta isomerase 2	enoyl-CoA delta isomerase 2, mitochondrial	enoyl-CoA delta isomerase 2, mitochondrial	Peroxisomal 3,2-trans-enoyl-CoA isomerase [Callorhinchus milii]
ENSMUSG00000021420	OMA07910	Yes	No	No	No	No	No	No	No	No	Yes	Fars2 phenylalanine-tRNA synthetase 2 (mitochondrial)	PREDICTED: phenylalanine--tRNA ligase, mitochondrial	phenylalanine--tRNA ligase, mitochondrial	Phenylalanyl-tRNA synthetase, mitochondrial [Macaca mulatta]
ENSMUSG00000021427	OMA09219	No	No	No	No	No	No	Act:-0.46	No	No	No	Ssr1 signal sequence receptor, alpha	translocon-associated protein subunit alpha precursor	translocon-associated protein subunit alpha isoform X2	translocon-associated protein subunit alpha precursor [Gallus gallus]
ENSMUSG00000021428	OMA05583	No	No	Yes	No	No	No	Rep:0.83	No	No	No	Riok1 RIO kinase 1 (yeast)	PREDICTED: serine/threonine-protein kinase RIO1 isoform X1	serine/threonine-protein kinase RIO1	RIO kinase 1 [Callorhinchus milii]
ENSMUSG00000021432	OMA06084	No	No	Yes	No	No	No	Act:-0.88	No	No	Yes	Slc35b3 solute carrier family 35, member B3	PREDICTED: adenosine 3'-phospho 5'-phosphosulfate transporter 2 isoform X1	adenosine 3'-phospho 5'-phosphosulfate transporter 2 isoform X2	UDP-galactose transporter [Anopheles darlingi]
ENSMUSG00000021448	OMA18164	No	No	NA	NA	NA	No	Act:-0.76	NA	NA	NA	Shc3 src homology 2 domain-containing transforming protein C3	NA	SHC-transforming protein 1 isoform X1	NA
ENSMUSG00000021451	OMA04262	No	Rep:1.27	Yes	No	NA	No	No	NA	NA	NA	Sema4d sema domain, immunoglobulin domain (Ig), transmembrane domain (TM) and short cytoplasmic domain, (semaphorin) 4D	semaphorin-4D precursor	semaphorin-1A isoform X3	NA
ENSMUSG00000021453	OMA15935	No	No	Yes	No	NA	No	Rep:1.42	NA	NA	NA	Gadd45g growth arrest and DNA-damage-inducible 45 gamma	growth arrest and DNA damage-inducible protein GADD45 gamma	growth arrest and DNA damage-inducible protein GADD45 alpha isoform X2	NA
ENSMUSG00000021456	OMA06868	No	No	No	Rep:2.38	NA	No	No	No	No	Yes	Fbp2 fructose bisphosphatase 2	fructose-1,6-bisphosphatase isozyme 2	fructose-1,6-bisphosphatase 1	Fructose-1,6-bisphosphatase 1 [Zootermopsis nevadensis]
ENSMUSG00000021464	OMA01299	Yes	No	Yes	No	NA	No	No	NA	NA	NA	Ror2 receptor tyrosine kinase-like orphan receptor 2	tyrosine-protein kinase transmembrane receptor ROR2 precursor	inactive tyrosine-protein kinase transmembrane receptor ROR1-like isoform X2	NA
ENSMUSG00000021466	OMA00481	Yes	No	Yes	No	NA	Yes	No	Yes	No	NA	Ptch1 patched 1	PREDICTED: protein patched homolog 1	protein patched homolog 1	Patched
ENSMUSG00000021469	OMA11951	No	No	Yes	No	NA	Yes	Act:-1.69	Yes	No	NA	Msx2 msh homeobox 2	PREDICTED: homeobox protein MSX-2	homeodomain protein isoform X1	Msx protein [Nematostella vectensis]
ENSMUSG00000021474	OMA06802	Yes	No	No	No	Yes	No	Rep:0.79	No	No	NA	Sfxn1 sideroflexin 1	sideroflexin-1	sideroflexin-1	Sideroflexin-1 [Crassostrea gigas]
ENSMUSG00000021477	OMA11093	Yes	No	No	No	Yes	No	No	No	No	NA	Ctsl cathepsin L	cathepsin L1 precursor	cathepsin L1	cathepsin L precursor [Hydra vulgaris]
ENSMUSG00000021478	OMA05540	Yes	No	No	No	NA	NA	NA	Yes	No	NA	Drd1 dopamine receptor D1	PREDICTED: D(1A) dopamine receptor	NA	RecName: Full=Beta-2 adrenergic receptor; AltName: Full=Beta-2 adrenoreceptor; Short=Beta-2 adrenoceptor [Tscherskia triton]
ENSMUSG00000021484	OMA07508	Yes	No	No	No	NA	No	No	NA	NA	No	Lman2 lectin, mannose-binding 2	vesicular integral-membrane protein VIP36 precursor	vesicular integral-membrane protein VIP36	NA
ENSMUSG00000021490	OMA06916	No	No	Yes	No	No	No	No	Yes	No	NA	Slc34a1 solute carrier family 34 (sodium phosphate), member 1	sodium-dependent phosphate transport protein 2B	sodium-dependent phosphate transport protein 2C isoform X1	Sodium-dependent phosphate transport protein 2B [Chelonia mydas]
ENSMUSG00000021493	OMA20873	No	No	Yes	Act:-1.40	NA	NA	NA	NA	NA	NA	Pdlim7 PDZ and LIM domain 7	PDZ and LIM domain protein 7	NA	NA
ENSMUSG00000021510	OMA06900	Yes	No	No	No	NA	NA	NA	NA	NA	NA	Zfp729a zinc finger protein 729a	PREDICTED: gastrula zinc finger protein XlCGF26.1 isoform X1	NA	NA
ENSMUSG00000021518	OMA03830	Yes	No	No	No	NA	No	No	NA	NA	No	Ptdss1 phosphatidylserine synthase 1	phosphatidylserine synthase 1	phosphatidylserine synthase 1 isoform X1	NA
ENSMUSG00000021519	OMA10811	Yes	No	No	No	NA	No	No	NA	NA	NA	Mterf3 mitochondrial transcription termination factor 3	PREDICTED: transcription termination factor 3, mitochondrial isoform X1	transcription termination factor 3, mitochondrial	NA
ENSMUSG00000021534	OMA22426	No	No	NA	NA	No	No	No	No	Rep:1.37	NA	1700001L19Rik RIKEN cDNA 1700001L19 gene	NA	uncharacterized protein LOC115923710	unnamed protein product [Oikopleura dioica]
ENSMUSG00000021536	OMA02760	No	No	Yes	No	NA	No	No	NA	NA	NA	Adcy2 adenylate cyclase 2	PREDICTED: adenylate cyclase type 4 isoform X1	adenylate cyclase type 2 isoform X1	NA
ENSMUSG00000021537	OMA12853	No	No	Yes	No	No	No	No	No	No	NA	Cetn3 centrin 3	centrin-3	centrin-3	centrin, EF-hand protein, 3 [Xenopus (Silurana) tropicalis]
ENSMUSG00000021540	OMA03488	Yes	No	Yes	No	No	No	Rep:0.74	Yes	No	NA	Smad5 SMAD family member 5	mothers against decapentaplegic homolog 1	mothers against decapentaplegic homolog 5	Smad1/5 [Nematostella vectensis]
ENSMUSG00000021546	OMA04847	No	No	No	No	No	No	Act:-0.72	NA	NA	NA	Hnrnpk heterogeneous nuclear ribonucleoprotein K	heterogeneous nuclear ribonucleoprotein K	heterogeneous nuclear ribonucleoprotein K isoform X2	NA
ENSMUSG00000021548	OMA09727	Yes	No	Yes	No	No	No	No	No	No	No	Ccnh cyclin H	cyclin-H	cyclin-H	Cyclin-H [Acromyrmex echinatior]
ENSMUSG00000021550	OMA11263	No	No	No	No	No	No	Rep:1.05	No	No	No	2210016F16Rik RIKEN cDNA 2210016F16 gene	UPF0553 protein C9orf64 homolog	queuosine salvage protein	upf0553 protein c9orf64 homolog [Lichtheimia corymbifera JMRC:FSU:9682]
ENSMUSG00000021553	OMA04490	Yes	No	No	No	No	No	No	No	No	NA	Slc28a3 solute carrier family 28 (sodium-coupled nucleoside transporter), member 3	PREDICTED: solute carrier family 28 member 3 isoform X1	solute carrier family 28 member 3	sodium/nucleoside cotransporter 1 [Oryctolagus cuniculus]
ENSMUSG00000021559	OMA00359	Yes	No	No	No	NA	NA	NA	NA	NA	NA	Dapk1 death associated protein kinase 1	death-associated protein kinase 1	NA	NA
ENSMUSG00000021565	OMA03094	No	No	No	No	Yes	NA	NA	NA	NA	NA	Slc6a19 solute carrier family 6 (neurotransmitter transporter), member 19	sodium-dependent neutral amino acid transporter B(0)AT1	NA	NA
ENSMUSG00000021567	OMA25266	No	Act:-1.37	NA	NA	NA	No	No	NA	NA	NA	Nkd2 naked cuticle 2 homolog (Drosophila)	NA	protein naked cuticle homolog 2	NA
ENSMUSG00000021572	OMA12842	No	No	NA	NA	No	No	Rep:0.94	No	No	NA	Cep72 centrosomal protein 72	NA	centrosomal protein of 72 kDa	Centrosomal protein of 72 kDa [Crassostrea gigas]
ENSMUSG00000021575	OMA11830	No	No	No	Rep:1.10	NA	NA	NA	NA	NA	NA	Ahrr aryl-hydrocarbon receptor repressor	PREDICTED: aryl hydrocarbon receptor repressor	NA	NA
ENSMUSG00000021576	OMA12487	No	No	No	No	NA	No	Rep:0.41	No	No	NA	Pdcd6 programmed cell death 6	programmed cell death protein 6	programmed cell death protein 6	Programmed cell death protein 6 [Crassostrea gigas]
ENSMUSG00000021589	OMA08199	Yes	No	No	No	NA	NA	NA	NA	NA	NA	Rhobtb3 Rho-related BTB domain containing 3	PREDICTED: rho-related BTB domain-containing protein 3	NA	NA
ENSMUSG00000021596	OMA02455	No	No	No	No	NA	No	Rep:0.70	No	No	Yes	Mctp1 multiple C2 domains, transmembrane 1	multiple C2 and transmembrane domain-containing protein 1	multiple C2 and transmembrane domain-containing protein 1 isoform X2	multiple c2 and transmembrane domain-containing protein 1 [Ascaris suum]
ENSMUSG00000021606	OMA19427	No	No	No	No	NA	No	Act:-0.65	No	No	No	Ndufs6 NADH dehydrogenase (ubiquinone) Fe-S protein 6	PREDICTED: NADH dehydrogenase	NADH dehydrogenase	NADH ubiquinone oxidoreductase subunit, putative [Ixodes scapularis]
ENSMUSG00000021610	OMA03028	No	No	No	No	NA	No	Rep:0.90	No	No	No	Clptm1l CLPTM1-like	cleft lip and palate transmembrane protein 1-like protein	cleft lip and palate transmembrane protein 1-like protein	cleft lip and palate transmembrane protein 1 [Cricetulus griseus]
ENSMUSG00000021613	OMA07002	Yes	No	No	No	NA	NA	NA	NA	NA	NA	Hapln1 hyaluronan and proteoglycan link protein 1	PREDICTED: hyaluronan and proteoglycan link protein 1	NA	NA
ENSMUSG00000021614	OMA06129	Yes	No	No	No	NA	NA	NA	NA	NA	NA	Vcan versican	PREDICTED: versican core protein	NA	NA
ENSMUSG00000021615	OMA18093	No	No	Yes	No	No	No	No	No	No	NA	Xrcc4 X-ray repair complementing defective repair in Chinese hamster cells 4	DNA repair protein XRCC4	DNA repair protein XRCC4 isoform X2	DNA repair protein XRCC4 [Crassostrea gigas]
ENSMUSG00000021660	OMA11863	No	No	No	No	NA	No	Act:-0.76	NA	NA	No	Btf3 basic transcription factor 3	transcription factor BTF3	transcription factor BTF3 homolog 4-like	NA
ENSMUSG00000021662	OMA01927	Yes	No	Yes	Rep:5.31	NA	No	Rep:0.94	NA	NA	NA	Arhgef28 Rho guanine nucleotide exchange factor (GEF) 28	PREDICTED: rho guanine nucleotide exchange factor 28 isoform X1	uncharacterized protein LOC574669 isoform X7	NA
ENSMUSG00000021666	OMA03328	No	No	No	No	Yes	No	No	NA	NA	No	Gfm2 G elongation factor, mitochondrial 2	PREDICTED: ribosome-releasing factor 2, mitochondrial isoform X1	ribosome-releasing factor 2, mitochondrial isoform X2	NA
ENSMUSG00000021670	OMA01393	No	No	No	No	No	Yes	No	No	No	No	Hmgcr 3-hydroxy-3-methylglutaryl-Coenzyme A reductase	PREDICTED: 3-hydroxy-3-methylglutaryl-Coenzyme A reductase	3-hydroxy-3-methylglutaryl-coenzyme A reductase	3-hydroxy-3-methylglutaryl-coenzyme A reductase [Harpegnathos saltator]
ENSMUSG00000021675	OMA15561	No	No	No	Rep:1.65	NA	NA	NA	No	Act:-1.74	NA	F2rl2 coagulation factor II (thrombin) receptor-like 2	proteinase-activated receptor 3 precursor	NA	AGAP001022-PB [Anopheles gambiae str. PEST]
ENSMUSG00000021676	OMA00674	Yes	No	Yes	No	Yes	NA	NA	NA	NA	NA	Iqgap2 IQ motif containing GTPase activating protein 2	PREDICTED: ras GTPase-activating-like protein IQGAP2	NA	NA
ENSMUSG00000021678	OMA09879	Yes	No	Yes	No	NA	NA	NA	No	No	NA	F2rl1 coagulation factor II (thrombin) receptor-like 1	PREDICTED: proteinase-activated receptor 2	NA	galanin receptor type 3 [Gallus gallus]
ENSMUSG00000021679	OMA19247	No	No	No	Act:-1.06	NA	NA	NA	NA	NA	NA	S100z S100 calcium binding protein, zeta	PREDICTED: protein S100-Z	NA	NA
ENSMUSG00000021680	OMA11314	No	No	No	No	Yes	No	Rep:1.76	NA	NA	NA	Crhbp corticotropin releasing hormone binding protein	PREDICTED: corticotropin-releasing factor-binding protein	corticotropin-releasing factor-binding protein	NA
ENSMUSG00000021681	OMA07207	No	No	No	No	NA	No	Rep:0.93	No	No	NA	Aggf1 angiogenic factor with G patch and FHA domains 1	PREDICTED: angiogenic factor with G patch and FHA domains 1 isoform X1	angiogenic factor with G patch and FHA domains 1 isoform X2	Angiogenic factor with G patch and FHA domains 1 [Acromyrmex echinatior]
ENSMUSG00000021684	OMA01868	No	No	No	No	Yes	No	No	No	No	NA	Pde8b phosphodiesterase 8B	PREDICTED: high affinity cAMP-specific and IBMX-insensitive 3',5'-cyclic phosphodiesterase 8B isoform X1	high affinity cAMP-specific and IBMX-insensitive 3',5'-cyclic phosphodiesterase 8B isoform X2	high affinity cAMP-specific and IBMX-insensitive 3',5'-cyclic phosphodiesterase 8A [Danio rerio]
ENSMUSG00000021685	OMA07112	No	No	Yes	No	NA	No	No	Yes	Rep:2.26	NA	Otp orthopedia homeobox	PREDICTED: homeobox protein orthopedia	homeobox protein orthopedia isoform X1	orthopedia [Nematostella vectensis]
ENSMUSG00000021686	OMA01367	No	No	Yes	No	NA	NA	NA	No	No	NA	Ap3b1 adaptor-related protein complex 3, beta 1 subunit	PREDICTED: AP-3 complex subunit beta-1 isoform X1	NA	AP-3 complex subunit beta-2;
ENSMUSG00000021693	OMA01439	No	No	No	No	NA	No	Rep:1.11	No	No	NA	Kif2a kinesin family member 2A	PREDICTED: kinesin-like protein KIF2A isoform X1	kinesin-like protein KIF2A isoform X2	Kinesin-like protein KIF2A [Crassostrea gigas]
ENSMUSG00000021694	OMA06930	Yes	No	No	No	Yes	No	No	No	No	No	Ercc8 excision repaiross-complementing rodent repair deficiency, complementation group 8	DNA excision repair protein ERCC-8	DNA excision repair protein ERCC-8	DNA excision repair protein ERCC-8 [Mus musculus]
ENSMUSG00000021696	OMA09440	No	No	No	No	No	No	No	NA	NA	NA	Elovl7 ELOVL family member 7, elongation of long chain fatty acids (yeast)	elongation of very long chain fatty acids protein 7	elongation of very long chain fatty acids protein 7	NA
ENSMUSG00000021697	OMA05815	Yes	No	No	No	No	No	Rep:0.51	NA	NA	NA	Depdc1b DEP domain containing 1B	DEP domain-containing protein 1B	DEP domain-containing protein 1B	NA
ENSMUSG00000021699	OMA02413	Yes	No	No	No	Yes	No	No	NA	NA	NA	Pde4d phosphodiesterase 4D, cAMP specific	PREDICTED: cAMP-specific 3',5'-cyclic phosphodiesterase 4D isoform X1	cAMP-specific 3',5'-cyclic phosphodiesterase 4C isoform X1	NA
ENSMUSG00000021700	OMA09258	Yes	Act:-4.48	No	No	No	No	Act:-0.91	NA	NA	NA	Rab3c RAB3C, member RAS oncogene family	PREDICTED: ras-related protein Rab-3C	rab3 GTPase	NA
ENSMUSG00000021702	OMA01420	No	No	No	No	Yes	No	No	NA	NA	NA	Thbs4 thrombospondin 4	thrombospondin-4 precursor	cartilage oligomeric matrix protein isoform X1	NA
ENSMUSG00000021728	OMA21258	Yes	No	No	No	NA	NA	NA	NA	NA	NA	Emb embigin	PREDICTED: embigin	NA	NA
ENSMUSG00000021730	OMA01540	Yes	No	No	No	No	No	No	No	No	NA	Hcn1 hyperpolarization-activated, cyclic nucleotide-gated K+ 1	PREDICTED: LOW QUALITY PROTEIN: potassium/sodium hyperpolarization-activated cyclic nucleotide-gated channel 1	hyperpolarization-activated (Ih) channel	I[[h]] channel, isoform I [Drosophila melanogaster]
ENSMUSG00000021733	OMA00635	Yes	No	No	No	Yes	No	No	NA	NA	NA	Slc4a7 solute carrier family 4, sodium bicarbonate cotransporter, member 7	PREDICTED: sodium bicarbonate cotransporter 3 isoform X1	LOW QUALITY PROTEIN: electrogenic sodium bicarbonate cotransporter 1	NA
ENSMUSG00000021738	OMA04451	Yes	No	No	No	NA	NA	NA	NA	NA	NA	Atxn7 ataxin 7	ataxin-7	NA	NA
ENSMUSG00000021743	OMA10838	No	No	Yes	No	NA	No	Act:-1.40	Yes	No	NA	Fezf2 Fez family zinc finger 2	fez family zinc finger protein 1	fez family zinc finger protein 2	fez family zinc finger protein 2-like isoform X2 [Orbicella faveolata]
ENSMUSG00000021745	OMA01963	Yes	No	No	No	No	NA	NA	NA	NA	NA	Ptprg protein tyrosine phosphatase, receptor type, G	PREDICTED: receptor-type tyrosine-protein phosphatase gamma	NA	NA
ENSMUSG00000021747	OMA09676	Yes	No	No	No	No	No	No	No	No	NA	4930452B06Rik RIKEN cDNA 4930452B06 gene	PREDICTED: uncharacterized protein C3orf67 homolog	uncharacterized protein LOC100893930 isoform X1	Uncharacterized protein C3orf67 homolog;
ENSMUSG00000021748	OMA06323	No	No	No	No	No	No	No	No	No	Yes	Pdhb pyruvate dehydrogenase (lipoamide) beta	pyruvate dehydrogenase E1 component subunit beta, mitochondrial	pyruvate dehydrogenase E1 component subunit beta, mitochondrial	pyruvate dehydrogenase E1 component subunit beta, mitochondrial precursor [Mus musculus]
ENSMUSG00000021750	OMA18632	Yes	No	No	No	NA	NA	NA	NA	NA	NA	Fam107a family with sequence similarity 107, member A	protein FAM107A	NA	NA
ENSMUSG00000021751	OMA07118	No	No	No	No	No	NA	NA	Yes	No	NA	Acox2 acyl-Coenzyme A oxidase 2, branched chain	peroxisomal acyl-coenzyme A oxidase 2	NA	peroxisomal acyl-coenzyme A oxidase 1 [Danio rerio]
ENSMUSG00000021752	OMA08167	No	No	No	No	Yes	No	No	No	No	NA	Kctd6 potassium channel tetramerisation domain containing 6	BTB/POZ domain-containing protein KCTD6	BTB/POZ domain-containing protein KCTD6	BTB/POZ domain-containing protein KCTD6 [Danio rerio]
ENSMUSG00000021754	OMA00587	No	No	No	No	NA	No	Rep:0.96	Yes	No	NA	Map3k1 mitogen-activated protein kinase kinase kinase 1	PREDICTED: mitogen-activated protein kinase kinase kinase 1	mitogen-activated protein kinase kinase kinase 1 isoform X2	PREDICTED: mitogen-activated protein kinase kinase kinase 1 isoform X1 [Rattus norvegicus]
ENSMUSG00000021756	OMA07759	No	No	Yes	Rep:1.51	NA	NA	NA	NA	NA	NA	Il6st interleukin 6 signal transducer	PREDICTED: interleukin-6 receptor subunit beta isoform X1	NA	NA
ENSMUSG00000021758	OMA06009	No	No	Yes	No	No	No	Act:-0.41	No	No	NA	Ddx4 DEAD (Asp-Glu-Ala-Asp) box polypeptide 4	probable ATP-dependent RNA helicase DDX4	vasa protein	Nvvasa2
ENSMUSG00000021759++	OMA12347	Yes	No	Yes	No	NA	No	No	NA	NA	NA	Plpp1 phospholipid phosphatase 1	phospholipid phosphatase 1	phospholipid phosphatase 1	NA
ENSMUSG00000021763	OMA00944	No	No	No	No	Yes	No	No	NA	NA	NA	BC067074 cDNA sequence BC067074	PREDICTED: chondroitin sulfate proteoglycan 4	chondroitin sulfate proteoglycan 4, partial	NA
ENSMUSG00000021764	OMA14930	Yes	No	Yes	No	NA	No	No	No	No	No	Ndufs4 NADH dehydrogenase (ubiquinone) Fe-S protein 4	PREDICTED: NADH dehydrogenase	NADH dehydrogenase	nadh dehydrogenase iron-sulfur protein [Ascaris suum]
ENSMUSG00000021765	OMA06872	No	No	Yes	No	NA	No	No	No	No	NA	Fst follistatin	follistatin	follistatin isoform X2	follistatin-like
ENSMUSG00000021768	OMA18144	No	No	No	No	NA	No	Rep:0.94	NA	NA	NA	Dusp13 dual specificity phosphatase 13	PREDICTED: dual specificity protein phosphatase 13	dual specificity protein phosphatase 3	NA
ENSMUSG00000021770	OMA05402	No	No	No	No	No	No	Rep:2.64	No	No	NA	Samd8 sterile alpha motif domain containing 8	sphingomyelin synthase-related protein 1	sphingomyelin synthase-related protein 1	sterile alpha motif domain containing 8 [Xenopus (Silurana) tropicalis]
ENSMUSG00000021779	OMA03908	Yes	No	No	No	NA	No	No	NA	NA	NA	Thrb thyroid hormone receptor beta	thyroid hormone receptor beta	thyroid hormone receptor beta isoform X1	NA
ENSMUSG00000021782	OMA00663	Yes	No	No	No	NA	No	Rep:0.60	No	No	NA	Dlg5 discs, large homolog 5 (Drosophila)	PREDICTED: disks large homolog 5 isoform X1	disks large homolog 5 isoform X1	disks large homolog 5-like [Exaiptasia pallida]
ENSMUSG00000021789	OMA17232	Yes	No	No	No	NA	NA	NA	No	No	NA	Sftpa1 surfactant associated protein A1	PREDICTED: pulmonary surfactant-associated protein A-like	NA	NA
ENSMUSG00000021794	OMA02922	Yes	No	No	No	NA	No	No	Yes	No	No	Glud1 glutamate dehydrogenase 1	glutamate dehydrogenase 1, mitochondrial	glutamate dehydrogenase, mitochondrial isoform X2	glutamate dehydrogenase 1a [Danio rerio]
ENSMUSG00000021796	OMA04067	No	No	Yes	No	NA	NA	NA	NA	NA	NA	Bmpr1a bone morphogenetic protein receptor, type 1A	PREDICTED: bone morphogenetic protein receptor type-1A	NA	NA
ENSMUSG00000021799	OMA08540	No	No	No	No	Yes	NA	NA	No	No	NA	Opn4 opsin 4 (melanopsin)	PREDICTED: melanopsin	NA	RecName: Full=Rhodopsin, GQ-coupled; AltName: Full=GQ-rhodopsin
ENSMUSG00000021803	OMA03173	No	Rep:2.05	Yes	No	NA	NA	NA	NA	NA	NA	Cdhr1 cadherin-related family member 1	PREDICTED: cadherin-related family member 1	NA	NA
ENSMUSG00000021806	OMA01724	No	No	Yes	No	Yes	No	No	NA	NA	NA	Nid2 nidogen 2	nidogen-2 precursor	nidogen-1	NA
ENSMUSG00000021807	OMA10141	No	No	No	No	NA	No	Act:-1.14	No	No	No	2700060E02Rik RIKEN cDNA 2700060E02 gene	PREDICTED: UPF0568 protein C14orf166 homolog	RNA transcription, translation and transport factor protein	putative homeobox prox 1 variant 3 [Taeniopygia guttata]
ENSMUSG00000021809	OMA13423	No	No	Yes	No	NA	No	No	NA	NA	NA	Nudt13 nudix (nucleoside diphosphate linked moiety X)-type motif 13	PREDICTED: nucleoside diphosphate-linked moiety X motif 13 isoform X1	nucleoside diphosphate-linked moiety X motif 13	NA
ENSMUSG00000021810	OMA06121	Yes	No	No	No	No	No	No	No	No	No	Ecd ecdysoneless homolog (Drosophila)	PREDICTED: protein ecdysoneless homolog	protein ecdysoneless homolog	Protein SGT1 [Fukomys damarensis]
ENSMUSG00000021820	OMA02211	No	No	No	No	No	No	Act:-0.77	No	No	No	Camk2g calcium/calmodulin-dependent protein kinase II gamma	calcium/calmodulin-dependent protein kinase type II subunit gamma	calcium/calmodulin-dependent protein kinase type II subunit alpha isoform X1	calcium/calmodulin-dependent protein kinase II isoform A [Periplaneta americana]
ENSMUSG00000021823	OMA00597	No	No	No	Act:-1.04	Yes	No	Act:-0.85	No	No	No	Vcl vinculin	vinculin	vinculin isoform X5	Vinculin [Cerapachys biroi]
ENSMUSG00000021835	OMA05737	No	No	Yes	Rep:1.06	Yes	Yes	No	NA	NA	NA	Bmp4 bone morphogenetic protein 4	bone morphogenetic protein 4 precursor	bone morphogenetic protein BMP2/4 isoform X2	NA
ENSMUSG00000021838	OMA03142	No	No	No	No	Yes	No	No	Yes	No	NA	Samd4 sterile alpha motif domain containing 4	protein Smaug homolog 1	protein Smaug homolog 1 isoform X1	Protein Smaug 1 [Cuculus canorus]
ENSMUSG00000021846	OMA04143	Yes	No	Yes	No	Yes	No	No	NA	NA	NA	Peli2 pellino 2	E3 ubiquitin-protein ligase pellino homolog 2	E3 ubiquitin-protein ligase pellino homolog 1 isoform X3	NA
ENSMUSG00000021848	OMA06221	No	No	Yes	No	Yes	Yes	Rep:0.56	NA	NA	NA	Otx2 orthodenticle homeobox 2	homeobox protein OTX2	homeobox protein OTX isoform alpha	NA
ENSMUSG00000021852	OMA12083	No	No	No	No	NA	No	Act:-0.66	NA	NA	NA	Slc35f4 solute carrier family 35, member F4	PREDICTED: solute carrier family 35 member F4 isoform X1	putative thiamine transporter SLC35F3 isoform X2	NA
ENSMUSG00000021870	OMA02398	Yes	No	No	No	NA	No	Rep:0.94	NA	NA	NA	Slmap sarcolemma associated protein	sarcolemmal membrane-associated protein	sarcolemmal membrane-associated protein isoform X4	NA
ENSMUSG00000021871	OMA13417	Yes	No	No	No	No	No	No	No	No	No	Pnp purine-nucleoside phosphorylase	purine nucleoside phosphorylase	purine nucleoside phosphorylase isoform X1	purine nucleoside phosphorylase 5a [Danio rerio]
ENSMUSG00000021874	NA	Yes	No	NA	NA	NA	NA	NA	NA	NA	NA	4933413J09Rik RIKEN cDNA 4933413J09 gene	NA	NA	NA
ENSMUSG00000021879	OMA00038	Yes	No	No	No	No	No	Rep:0.46	No	No	NA	Dnah12 dynein, axonemal, heavy chain 12	PREDICTED: dynein heavy chain 12, axonemal isoform X1	dynein heavy chain 12, axonemal-like isoform X2	Dynein heavy chain 7, axonemal [Crassostrea gigas]
ENSMUSG00000021884	OMA04635	No	No	No	No	No	No	No	Yes	No	No	Hacl1 2-hydroxyacyl-CoA lyase 1	2-hydroxyacyl-CoA lyase 1	2-hydroxyacyl-CoA lyase 1	2-hydroxyacyl-CoA lyase 1 [Gallus gallus]
ENSMUSG00000021891	OMA10795	No	No	No	No	No	No	Rep:1.54	No	No	No	Mettl6 methyltransferase like 6	methyltransferase-like protein 6	methyltransferase-like protein 6	methyltransferase, putative [Ixodes scapularis]
ENSMUSG00000021892	OMA06564	No	No	No	No	Yes	NA	NA	No	No	NA	Sh3bp5 SH3-domain binding protein 5 (BTK-associated)	SH3 domain-binding protein 5	NA	SH3 domain-binding protein 5;
ENSMUSG00000021895	OMA04204	No	No	Yes	No	Yes	No	No	Yes	No	No	Arhgef3 Rho guanine nucleotide exchange factor (GEF) 3	PREDICTED: rho guanine nucleotide exchange factor 3 isoform X1	rho guanine nucleotide exchange factor 3 isoform X1	neuroepithelial cell-transforming gene 1 protein [Pongo abelii]
ENSMUSG00000021903	OMA11365	No	No	No	Act:-1.57	NA	NA	NA	NA	NA	NA	Galnt15 UDP-N-acetyl-alpha-D-galactosamine:polypeptide N-acetylgalactosaminyltransferase 15	PREDICTED: polypeptide N-acetylgalactosaminyltransferase 15	NA	NA
ENSMUSG00000021905	OMA20673	No	No	No	No	NA	NA	NA	Yes	No	Yes	Dph3 diphthamine biosynthesis 3	DPH3 homolog	NA	Chain A, Solution Structure Of The Mouse Desr1
ENSMUSG00000021906	OMA12844	No	No	No	No	No	No	No	Yes	No	NA	Oxnad1 oxidoreductase NAD-binding domain containing 1	oxidoreductase NAD-binding domain-containing protein 1 precursor	oxidoreductase NAD-binding domain-containing protein 1 isoform X1	CDP-6-deoxy-delta-3,4-glucoseen reductase [Actinoplanes subtropicus]
ENSMUSG00000021907	OMA27365	No	No	No	Act:-3.61	NA	NA	NA	NA	NA	NA	Msmb beta-microseminoprotein	PREDICTED: beta-microseminoprotein-like	NA	NA
ENSMUSG00000021908	NA	No	No	NA	NA	NA	NA	NA	NA	NA	NA	Gm6768 predicted gene 6768	NA	NA	NA
ENSMUSG00000021911	OMA05244	No	No	No	Rep:2.10	No	No	No	No	No	No	Parg poly (ADP-ribose) glycohydrolase	poly(ADP-ribose) glycohydrolase	poly(ADP-ribose) glycohydrolase	TPA: poly(ADP-ribose) glycohydrolase [Bos taurus]
ENSMUSG00000021918	OMA07493	No	No	No	No	No	No	Rep:0.59	No	No	NA	Nek4 NIMA (never in mitosis gene a)-related expressed kinase 4	serine/threonine-protein kinase Nek4	serine/threonine-protein kinase Nek4 isoform X1	Serine/threonine-protein kinase Nek4;
ENSMUSG00000021919	OMA03688	No	No	No	No	No	No	Rep:3.77	No	No	NA	Chat choline acetyltransferase	PREDICTED: choline O-acetyltransferase	choline O-acetyltransferase	Carnitine O-acetyltransferase;
ENSMUSG00000021928	OMA14713	Yes	No	No	No	NA	NA	NA	No	No	No	Ebpl emopamil binding protein-like	PREDICTED: emopamil-binding protein-like	NA	ebpl protein [Capsaspora owczarzaki ATCC 30864]
ENSMUSG00000021929	OMA02366	No	No	No	No	No	No	Rep:1.08	No	No	No	Kpna3 karyopherin (importin) alpha 3	importin subunit alpha-4	importin subunit alpha-3	Importin subunit alpha-3 [Heterocephalus glaber]
ENSMUSG00000021932	OMA15411	No	No	Yes	No	No	No	No	No	No	No	Rnaseh2b ribonuclease H2, subunit B	ribonuclease H2 subunit B	ribonuclease H2 subunit B	ribonuclease H2 subunit B [Xenopus (Silurana) tropicalis]
ENSMUSG00000021939	OMA09223	No	No	No	No	NA	No	No	No	No	Yes	Ctsb cathepsin B	cathepsin B precursor	cathepsin B	cathepsin B [Crassostrea ariakensis]
ENSMUSG00000021940	OMA21394	Yes	No	NA	NA	NA	No	No	NA	NA	No	Ptpn20 protein tyrosine phosphatase, non-receptor type 20	NA	receptor-type tyrosine-protein phosphatase F	NA
ENSMUSG00000021943	OMA12574	No	Rep:2.56	No	Rep:1.28	NA	No	No	NA	NA	NA	Gdf10 growth differentiation factor 10	PREDICTED: growth/differentiation factor 10	bone morphogenetic protein 3	NA
ENSMUSG00000021944	OMA09353	No	No	Yes	No	NA	NA	NA	NA	NA	NA	Gata4 GATA binding protein 4	transcription factor GATA-4	NA	NA
ENSMUSG00000021951	OMA14681	Yes	No	No	No	NA	NA	NA	NA	NA	No	Eef1akmt1 eukaryotic translation elongation factor 1 alpha lysine methyltransferase 1	protein-lysine N-methyltransferase N6AMT2	NA	NA
ENSMUSG00000021957	OMA02956	No	No	No	No	No	No	No	No	No	Yes	Tkt transketolase	transketolase	transketolase isoform X1	Transketolase-like protein 2 [Acromyrmex echinatior]
ENSMUSG00000021959	OMA01765	No	No	No	No	No	No	Rep:0.52	NA	NA	NA	Lats2 large tumor suppressor 2	serine/threonine-protein kinase LATS2	serine/threonine-protein kinase LATS1 isoform X1	NA
ENSMUSG00000021963	OMA12786	No	No	No	No	No	No	Act:-1.74	No	No	No	Sap18 Sin3-associated polypeptide 18	histone deacetylase complex subunit SAP18	histone deacetylase complex subunit SAP18-like	Sin3A-associated protein, 18kDa [Callorhinchus milii]
ENSMUSG00000021972	OMA08297	Yes	No	Yes	No	Yes	NA	NA	NA	NA	NA	Hmbox1 homeobox containing 1	PREDICTED: homeobox-containing protein 1	NA	NA
ENSMUSG00000021978	OMA00878	Yes	No	Yes	No	No	No	No	Yes	No	NA	Extl3 exostoses (multiple)-like 3	exostosin-like 3	LOW QUALITY PROTEIN: exostosin-like 3	Exostosin-3 [Acromyrmex echinatior]
ENSMUSG00000021983	OMA00801	Yes	No	Yes	No	No	No	No	NA	NA	NA	Atp8a2 ATPase, aminophospholipid transporter-like, class I, type 8A, member 2	PREDICTED: phospholipid-transporting ATPase IB	probable phospholipid-transporting ATPase IA isoform X5	NA
ENSMUSG00000021990	OMA02581	No	No	Yes	No	Yes	NA	NA	Yes	No	NA	Spata13 spermatogenesis associated 13	PREDICTED: spermatogenesis-associated protein 13 isoform X1	NA	Rho guanine nucleotide exchange factor 4;
ENSMUSG00000021991	OMA00828	No	No	No	No	Yes	No	No	NA	NA	NA	Cacna2d3 calcium channel, voltage-dependent, alpha2/delta subunit 3	PREDICTED: LOW QUALITY PROTEIN: voltage-dependent calcium channel subunit alpha-2/delta-3, partial	voltage-dependent calcium channel subunit alpha-2/delta-3 isoform X2	NA
ENSMUSG00000021993	OMA03002	Yes	No	No	No	NA	No	No	No	No	No	Mipep mitochondrial intermediate peptidase	PREDICTED: mitochondrial intermediate peptidase isoform X1	mitochondrial intermediate peptidase-like	mitochondrial intermediate peptidase precursor [Pongo abelii]
ENSMUSG00000021994	OMA05503	No	No	No	No	Yes	No	No	No	No	NA	Wnt5a wingless-type MMTV integration site family, member 5A	PREDICTED: protein Wnt-5a	protein Wnt-5b	NvWnt5
ENSMUSG00000021996	OMA08912	No	No	No	No	No	No	No	Yes	Act:-1.01	No	Esd esterase D/formylglutathione hydrolase	S-formylglutathione hydrolase	S-formylglutathione hydrolase	GF17336 [Drosophila ananassae]
ENSMUSG00000021998	OMA02307	No	No	No	Rep:1.05	NA	No	Act:-0.53	No	No	NA	Lcp1 lymphocyte cytosolic protein 1	plastin-2	plastin-3	fimbrin [Capsaspora owczarzaki ATCC 30864]
ENSMUSG00000022010	OMA04584	Yes	No	No	No	NA	NA	NA	NA	NA	NA	Tsc22d1 TSC22 domain family, member 1	TSC22 domain family protein 1 isoform 1	NA	NA
ENSMUSG00000022012	OMA03138	No	No	Yes	No	NA	No	No	NA	NA	NA	Enox1 ecto-NOX disulfide-thiol exchanger 1	PREDICTED: ecto-NOX disulfide-thiol exchanger 1	ecto-NOX disulfide-thiol exchanger 2 isoform X1	NA
ENSMUSG00000022019	OMA07247	Yes	No	No	No	NA	No	No	NA	NA	NA	Tdrd3 tudor domain containing 3	tudor domain-containing protein 3	tudor domain-containing protein 3	NA
ENSMUSG00000022020	OMA01573	No	No	Yes	No	No	No	No	No	Rep:1.01	NA	Naa16 N(alpha)-acetyltransferase 16, NatA auxiliary subunit	PREDICTED: N-alpha-acetyltransferase 16, NatA auxiliary subunit isoform X1	N-alpha-acetyltransferase 15, NatA auxiliary subunit	N-alpha-acetyltransferase 15, NatA auxiliary subunit [Cuculus canorus]
ENSMUSG00000022024	OMA10991	No	No	No	No	No	No	Act:-0.49	No	No	No	Sugt1 SGT1, suppressor of G2 allele of SKP1 (S. cerevisiae)	protein SGT1 homolog	protein SGT1 homolog isoform X2	Suppressor of G2 allele of SKP1-like protein [Crassostrea gigas]
ENSMUSG00000022025	OMA09767	No	No	No	Act:-3.22	No	NA	NA	NA	NA	NA	Cnmd chondromodulin	leukocyte cell-derived chemotaxin 1	NA	NA
ENSMUSG00000022026	OMA11822	No	No	No	Rep:1.47	NA	NA	NA	NA	NA	NA	Olfm4 olfactomedin 4	olfactomedin 4 precursor	NA	NA
ENSMUSG00000022032	OMA08004	Yes	No	No	No	NA	NA	NA	NA	NA	NA	Scara5 scavenger receptor class A, member 5	PREDICTED: scavenger receptor class A member 5	NA	NA
ENSMUSG00000022040	OMA07690	No	No	No	Rep:1.04	No	No	No	No	No	No	Ephx2 epoxide hydrolase 2, cytoplasmic	bifunctional epoxide hydrolase 2	soluble epoxide hydrolase-like protein 1	epoxide hydrolase 2, cytoplasmic [Xenopus (Silurana) tropicalis]
ENSMUSG00000022041	OMA05120	No	No	No	No	NA	No	Act:-0.62	No	No	NA	Chrna2 cholinergic receptor, nicotinic, alpha polypeptide 2 (neuronal)	PREDICTED: neuronal acetylcholine receptor subunit alpha-2	neuronal acetylcholine receptor subunit alpha-3	nicotinic acetylcholine receptor alpha6 subunit [Apis mellifera]
ENSMUSG00000022044	OMA13902	No	No	No	Rep:1.50	NA	NA	NA	NA	NA	NA	Stmn4 stathmin-like 4	stathmin-4	NA	NA
ENSMUSG00000022053	OMA02095	No	No	No	Rep:1.13	NA	No	No	NA	NA	NA	Ebf2 early B cell factor 2	transcription factor coe2	transcription factor COE3 isoform X2	NA
ENSMUSG00000022061	OMA20960	No	No	Yes	No	NA	NA	NA	NA	NA	NA	Nkx3-1 NK-3 transcription factor, locus 1 (Drosophila)	PREDICTED: homeobox protein Nkx-3.1	NA	NA
ENSMUSG00000022064	OMA03285	No	No	Yes	No	No	No	No	No	No	NA	Pibf1 progesterone immunomodulatory binding factor 1	progesterone-induced-blocking factor 1	progesterone-induced-blocking factor 1 isoform X2	progesterone-induced-blocking factor 1 [Homo sapiens]
ENSMUSG00000022066	OMA03439	No	No	Yes	No	NA	No	No	NA	NA	NA	Entpd4b ectonucleoside triphosphate diphosphohydrolase 4B	ectonucleoside triphosphate diphosphohydrolase 4	ectonucleoside triphosphate diphosphohydrolase 4-like	NA
ENSMUSG00000022085	OMA25947	Yes	No	NA	NA	No	No	No	No	No	NA	Pebp4 phosphatidylethanolamine binding protein 4	NA	protein MOTHER of FT and TFL1-like	Phosphatidylethanolamine-binding protein 4 [Crassostrea gigas]
ENSMUSG00000022090	OMA21355	No	No	Yes	Act:-1.55	NA	NA	NA	NA	NA	NA	Pdlim2 PDZ and LIM domain 2	PREDICTED: PDZ and LIM domain protein 2	NA	NA
ENSMUSG00000022091	OMA19711	No	No	NA	NA	Yes	No	No	No	No	NA	Sorbs3 sorbin and SH3 domain containing 3	NA	vinexin-like isoform X5	Vinexin;
ENSMUSG00000022099	OMA12014	No	No	No	No	NA	No	Rep:0.97	NA	NA	NA	Dmtn dematin actin binding protein	dematin	actin-binding LIM protein 1 isoform X7	NA
ENSMUSG00000022100	OMA00504	No	No	No	No	Yes	No	No	No	No	No	Xpo7 exportin 7	PREDICTED: exportin-7	exportin-7	exportin-7 [Gallus gallus]
ENSMUSG00000022103	OMA10943	Yes	No	No	No	NA	NA	NA	NA	NA	NA	Gfra2 glial cell line derived neurotrophic factor family receptor alpha 2	GDNF family receptor alpha-2 precursor	NA	NA
ENSMUSG00000022105	OMA03469	No	No	Yes	No	NA	No	No	NA	NA	NA	Rb1 RB transcriptional corepressor 1	retinoblastoma-associated protein	retinoblastoma-associated protein	NA
ENSMUSG00000022106	OMA03821	Yes	No	Yes	No	No	No	No	No	No	NA	Rcbtb2 regulator of chromosome condensation (RCC1) and BTB (POZ) domain containing protein 2	RCC1 and BTB domain-containing protein 2	RCC1 and BTB domain-containing protein 1	PREDICTED: RCC1 and BTB domain-containing protein 1 [Gorilla gorilla gorilla]
ENSMUSG00000022111	OMA12173	No	No	No	Act:-1.35	NA	No	No	No	No	No	Uchl3 ubiquitin carboxyl-terminal esterase L3 (ubiquitin thiolesterase)	ubiquitin carboxyl-terminal hydrolase isozyme L3	ubiquitin carboxyl-terminal hydrolase isozyme L3 isoform X2	ubiquitin carboxyl-terminal esterase L3 (ubiquitin thiolesterase) [Xenopus laevis]
ENSMUSG00000022112	OMA19994	Yes	No	NA	NA	NA	No	No	NA	NA	NA	Gpc5 glypican 5	NA	glypican-5 precursor	NA
ENSMUSG00000022114	OMA09751	Yes	No	Yes	No	NA	NA	NA	NA	NA	NA	Spry2 sprouty homolog 2 (Drosophila)	protein sprouty homolog 2	NA	NA
ENSMUSG00000022116	NA	Yes	No	NA	NA	NA	NA	NA	NA	NA	NA	4930449E01Rik RIKEN cDNA 4930449E01 gene	NA	NA	NA
ENSMUSG00000022119	OMA07268	No	No	No	No	No	No	Rep:0.78	NA	NA	NA	Rbm26 RNA binding motif protein 26	RNA-binding protein 26	RNA-binding protein 26	NA
ENSMUSG00000022122	OMA08474	No	No	No	No	NA	NA	NA	Yes	No	NA	Ednrb endothelin receptor type B	endothelin B receptor precursor	NA	neuropeptide receptor A33 [Bombyx mori]
ENSMUSG00000022132	OMA13439	No	No	No	Act:-1.95	No	NA	NA	NA	NA	NA	Cldn10 claudin 10	PREDICTED: claudin-10-like	NA	NA
ENSMUSG00000022136	OMA04917	No	No	No	No	No	No	Act:-1.09	No	No	NA	Dnajc3 DnaJ heat shock protein family (Hsp40) member C3	dnaJ homolog subfamily C member 3 precursor	LOW QUALITY PROTEIN: dnaJ homolog subfamily C member 3	Prkri protein [Danio rerio]
ENSMUSG00000022139++	OMA04539	Yes	No	No	No	Yes	No	Act:-1.31	NA	NA	NA	Mbnl2 muscleblind like splicing factor 2	muscleblind-like protein 2	muscleblind-like protein 2 isoform X4	NA
ENSMUSG00000022141	OMA00085	No	No	No	No	No	No	Rep:0.60	No	No	No	Nipbl Nipped-B homolog (Drosophila)	PREDICTED: nipped-B-like protein isoform X1	nipped-B-like protein A	Nipped-B-like protein [Crassostrea gigas]
ENSMUSG00000022146	OMA13248	Yes	No	No	No	NA	NA	NA	NA	NA	NA	Osmr oncostatin M receptor	PREDICTED: oncostatin-M-specific receptor subunit beta	NA	NA
ENSMUSG00000022150	OMA05722	No	No	Yes	No	NA	NA	NA	NA	NA	NA	Dab2 disabled 2, mitogen-responsive phosphoprotein	PREDICTED: disabled homolog 2 isoform X1	NA	NA
ENSMUSG00000022151	OMA15604	Yes	No	No	No	NA	No	No	NA	NA	NA	Ttc33 tetratricopeptide repeat domain 33	tetratricopeptide repeat protein 33	tetratricopeptide repeat protein 33-like	NA
ENSMUSG00000022174	OMA16822	No	No	No	No	No	No	Act:-0.80	No	No	No	Dad1 defender against cell death 1	dolichyl-diphosphooligosaccharide--protein glycosyltransferase subunit DAD1	dolichyl-diphosphooligosaccharide--protein glycosyltransferase subunit dad1	defender against cell death 1 [Culex quinquefasciatus]
ENSMUSG00000022175	OMA10920	No	No	Yes	No	NA	NA	NA	NA	NA	NA	Lrp10 low-density lipoprotein receptor-related protein 10	PREDICTED: low-density lipoprotein receptor-related protein 10	NA	NA
ENSMUSG00000022180	OMA03107	No	No	Yes	No	No	No	No	No	No	NA	Slc7a8 solute carrier family 7 (cationic amino acid transporter, y+ system), member 8	large neutral amino acids transporter small subunit 2	Y+L amino acid transporter 2	B(0,+)-type amino acid transporter 1 [Mus musculus]
ENSMUSG00000022181	OMA04617	No	No	Yes	No	No	NA	NA	NA	NA	NA	C6 complement component 6	complement component 6, gene 2 precursor	NA	NA
ENSMUSG00000022184	OMA12295	Yes	No	No	No	No	No	No	NA	NA	NA	Fbxo4 F-box protein 4	F-box only protein 4	F-box only protein 4 isoform X1	NA
ENSMUSG00000022185	OMA05533	No	No	No	No	No	No	Rep:0.51	No	No	NA	Acin1 apoptotic chromatin condensation inducer 1	PREDICTED: apoptotic chromatin condensation inducer in the nucleus	apoptotic chromatin condensation inducer in the nucleus isoform X2	Apoptotic chromatin condensation inducer in the nucleus;
ENSMUSG00000022186	OMA04470	Yes	No	No	No	No	No	No	No	No	No	Oxct1 3-oxoacid CoA transferase 1	succinyl-CoA:3-ketoacid coenzyme A transferase 1, mitochondrial	succinyl-CoA:3-ketoacid coenzyme A transferase 1, mitochondrial	3-oxoacid CoA transferase 1 [synthetic construct]
ENSMUSG00000022193	OMA10475	No	No	No	No	No	No	No	No	No	Yes	Psmb5 proteasome (prosome, macropain) subunit, beta type 5	PREDICTED: proteasome subunit beta type-5	proteasome subunit beta type-5	LMP X [Swiftia exserta]
ENSMUSG00000022197	OMA04597	Yes	No	No	No	NA	NA	NA	NA	NA	NA	Pdzd2 PDZ domain containing 2	PREDICTED: PDZ domain-containing protein 2 isoform X1	NA	NA
ENSMUSG00000022200	OMA08572	No	No	No	No	No	Yes	Rep:0.78	No	No	No	Golph3 golgi phosphoprotein 3	Golgi phosphoprotein 3	Golgi phosphoprotein 3	Golgi phosphoprotein 3 [Crassostrea gigas]
ENSMUSG00000022204	OMA12033	No	No	No	No	No	Yes	No	Yes	No	NA	Ngdn neuroguidin, EIF4E binding protein	neuroguidin	neuroguidin	Neuroguidin [Heterocephalus glaber]
ENSMUSG00000022206	OMA05593	No	Act:-1.41	Yes	No	No	NA	NA	NA	NA	NA	Npr3 natriuretic peptide receptor 3	PREDICTED: atrial natriuretic peptide receptor 3 isoform X1	NA	NA
ENSMUSG00000022215	OMA16551	No	No	No	Act:-1.12	NA	NA	NA	NA	NA	NA	Fitm1 fat storage-inducing transmembrane protein 1	PREDICTED: fat storage-inducing transmembrane protein 1	NA	NA
ENSMUSG00000022220	OMA02408	No	No	Yes	No	NA	No	No	NA	NA	NA	Adcy4 adenylate cyclase 4	PREDICTED: adenylate cyclase type 4 isoform X1	adenylate cyclase type 2 isoform X1	NA
ENSMUSG00000022225	OMA24080	Yes	No	No	No	NA	NA	NA	NA	NA	NA	Cma1 chymase 1, mast cell	cathepsin G	NA	NA
ENSMUSG00000022228	OMA19438	Yes	No	Yes	No	NA	NA	NA	NA	NA	NA	Zscan26 zinc finger and SCAN domain containing 26	PREDICTED: oocyte zinc finger protein XlCOF7.1-like isoform X3	NA	NA
ENSMUSG00000022231	NA	Yes	No	NA	NA	NA	NA	NA	NA	NA	NA	Sema5a sema domain, seven thrombospondin repeats (type 1 and type 1-like), transmembrane domain (TM) and short cytoplasmic domain, (semaphorin) 5A	NA	NA	NA
ENSMUSG00000022235	OMA12958	No	No	No	Act:-1.57	NA	NA	NA	NA	NA	NA	Cmbl carboxymethylenebutenolidase-like (Pseudomonas)	carboxymethylenebutenolidase homolog	NA	NA
ENSMUSG00000022236	OMA15823	No	No	No	No	No	No	Act:-1.25	No	No	NA	Ropn1l ropporin 1-like	ropporin-1-like protein	ropporin-1-like protein	ropporin-1-like protein [Cerebratulus lacteus]
ENSMUSG00000022237	OMA11609	Yes	No	No	No	No	NA	NA	NA	NA	NA	Ankrd33b ankyrin repeat domain 33B	PREDICTED: ankyrin repeat domain-containing protein 33B	NA	NA
ENSMUSG00000022240	OMA00486	Yes	No	Yes	No	No	No	No	Yes	No	NA	Ctnnd2 catenin (cadherin associated protein), delta 2	PREDICTED: catenin delta-2	catenin delta-2 isoform X2	Catenin delta-2;
ENSMUSG00000022241	OMA01542	No	No	No	No	No	No	Act:-0.73	No	No	No	Tars threonyl-tRNA synthetase	threonine--tRNA ligase, cytoplasmic	threonine--tRNA ligase, cytoplasmic isoform X2	threonine--tRNA ligase, cytoplasmic [Xenopus (Silurana) tropicalis]
ENSMUSG00000022247	OMA08843	No	No	No	No	No	No	No	No	Rep:1.32	Yes	Brix1 BRX1, biogenesis of ribosomes	ribosome biogenesis protein BRX1 homolog	ribosome biogenesis protein BRX1 homolog	Bxdc2 protein [Danio rerio]
ENSMUSG00000022255	OMA11488	Yes	No	No	No	NA	NA	NA	NA	NA	NA	Mtdh metadherin	protein LYRIC	NA	NA
ENSMUSG00000022257	OMA11367	No	No	No	No	NA	No	Act:-0.94	NA	NA	NA	Laptm4b lysosomal-associated protein transmembrane 4B	PREDICTED: lysosomal-associated transmembrane protein 4B	lysosomal-associated transmembrane protein 4A	NA
ENSMUSG00000022261	OMA26408	Yes	No	NA	NA	No	NA	NA	NA	NA	NA	Sdc2 syndecan 2	NA	NA	NA
ENSMUSG00000022262	OMA00013	Yes	No	No	No	NA	No	No	No	No	NA	Dnah5 dynein, axonemal, heavy chain 5	PREDICTED: dynein heavy chain 5, axonemal	dynein heavy chain 5, axonemal isoform X2	Dynein heavy chain 5, axonemal [Crassostrea gigas]
ENSMUSG00000022263	OMA00042	Yes	No	No	No	NA	No	No	Yes	No	NA	Trio triple functional domain (PTPRF interacting)	triple functional domain protein	kalirin	kalirin [Bos taurus]
ENSMUSG00000022272	OMA00588	Yes	No	No	No	Yes	No	No	No	No	NA	Myo10 myosin X	PREDICTED: unconventional myosin-X	unconventional myosin-X isoform X1	myosin X, isoform CRA_a [Homo sapiens]
ENSMUSG00000022280	OMA01454	No	No	No	No	NA	No	Rep:0.59	NA	NA	NA	Rnf19a ring finger protein 19A	E3 ubiquitin-protein ligase RNF19A	E3 ubiquitin-protein ligase RNF19A	NA
ENSMUSG00000022283	OMA01612	No	No	No	No	No	NA	NA	No	No	No	Pabpc1 poly(A) binding protein, cytoplasmic 1	polyadenylate-binding protein 1	NA	Polyadenylate-binding protein 4 [Tyto alba]
ENSMUSG00000022285	OMA08739	Yes	No	No	No	NA	No	No	NA	NA	NA	Ywhaz tyrosine 3-monooxygenase/tryptophan 5-monooxygenase activation protein, zeta polypeptide	14-3-3 protein zeta	14-3-3-like protein	NA
ENSMUSG00000022286	OMA03077	No	No	No	No	NA	NA	NA	NA	NA	Yes	Grhl2 grainyhead-like 2 (Drosophila)	grainyhead-like protein 2 homolog	NA	NA
ENSMUSG00000022292	OMA06792	Yes	No	No	No	NA	NA	NA	No	No	NA	Rrm2b ribonucleotide reductase M2 B (TP53 inducible)	ribonucleoside-diphosphate reductase subunit M2 B	NA	ribonucleoside-diphosphate reductase subunit M2 [Danio rerio]
ENSMUSG00000022299	OMA09692	No	No	No	No	NA	No	No	Yes	No	No	Slc25a32 solute carrier family 25, member 32	mitochondrial folate transporter/carrier	mitochondrial folate transporter/carrier	slc25a32 protein [Xenopus (Silurana) tropicalis]
ENSMUSG00000022304	OMA04625	No	No	No	No	NA	No	No	Yes	No	No	Dpys dihydropyrimidinase	PREDICTED: dihydropyrimidinase	dihydropyrimidinase	Dihydropyrimidinase [Crassostrea gigas]
ENSMUSG00000022307	OMA02912	No	No	Yes	No	Yes	NA	NA	No	No	NA	Oxr1 oxidation resistance 1	oxidation resistance protein 1	NA	oxidation resistance protein 1 isoform 2 [Rattus norvegicus]
ENSMUSG00000022309	OMA03910	Yes	No	Yes	No	Yes	No	No	NA	NA	NA	Angpt1 angiopoietin 1	PREDICTED: angiopoietin-1 isoform X1	ficolin-2	NA
ENSMUSG00000022311	OMA00022	Yes	No	No	No	NA	NA	NA	NA	NA	NA	Csmd3 CUB and Sushi multiple domains 3	PREDICTED: CUB and sushi domain-containing protein 3	NA	NA
ENSMUSG00000022314	OMA02362	Yes	No	No	No	NA	No	Rep:0.67	No	No	NA	Rad21 RAD21 cohesin complex component	PREDICTED: double-strand-break repair protein rad21 homolog	double-strand-break repair protein rad21 homolog	PREDICTED: double-strand-break repair protein rad21 homolog [Danio rerio]
ENSMUSG00000022321	OMA01679	Yes	No	No	No	NA	NA	NA	No	No	NA	Cdh10 cadherin 10	PREDICTED: cadherin-10	NA	anchor protein [Homo sapiens]
ENSMUSG00000022322	OMA06541	Yes	No	No	No	NA	No	No	No	No	NA	Shcbp1 Shc SH2-domain binding protein 1	SHC SH2 domain-binding protein 1	SHC SH2 domain-binding protein 1 isoform X1	SHC SH2 domain-binding protein 1 [Chelonia mydas]
ENSMUSG00000022323	OMA17966	No	No	No	Act:-1.18	No	No	No	No	No	No	Rida reactive intermediate imine deaminase A homolog	ribonuclease UK114	2-iminobutanoate/2-iminopropanoate deaminase isoform X1	heat-responsive protein 12 [Callorhinchus milii]
ENSMUSG00000022324	OMA03268	No	No	No	No	Yes	NA	NA	NA	NA	NA	Matn2 matrilin 2	matrilin-2 precursor	NA	NA
ENSMUSG00000022330	OMA07154	No	No	Yes	No	Yes	No	Act:-2.51	NA	NA	NA	Osr2 odd-skipped related 2	PREDICTED: protein odd-skipped-related 2 isoform X1	protein odd-skipped-related 2 isoform X1	NA
ENSMUSG00000022336	OMA03072	No	No	Yes	No	No	No	No	No	No	No	Eif3e eukaryotic translation initiation factor 3, subunit E	eukaryotic translation initiation factor 3 subunit E	eukaryotic translation initiation factor 3 subunit E	eukaryotic translation initiation factor 3, subunit E [Callorhinchus milii]
ENSMUSG00000022342	OMA06694	Yes	No	No	No	NA	NA	NA	NA	NA	NA	Kcnv1 potassium channel, subfamily V, member 1	PREDICTED: potassium voltage-gated channel subfamily V member 1	NA	NA
ENSMUSG00000022364	OMA02228	No	No	No	No	Yes	No	Rep:1.01	No	No	NA	Tbc1d31 TBC1 domain family, member 31	TBC1 domain family member 31	TBC1 domain family member 31	WD repeat-containing protein 67 [Crassostrea gigas]
ENSMUSG00000022366	OMA21301	Yes	No	NA	NA	No	No	No	NA	NA	NA	Slc22a22 solute carrier family 22 (organic cation transporter), member 22	NA	organic cation transporter protein-like	NA
ENSMUSG00000022367	OMA02556	Yes	No	Yes	No	NA	NA	NA	NA	NA	NA	Has2 hyaluronan synthase 2	hyaluronan synthase 2	NA	NA
ENSMUSG00000022371	NA	Yes	No	NA	NA	NA	NA	NA	NA	NA	NA	Col14a1 collagen, type XIV, alpha 1	NA	NA	NA
ENSMUSG00000022375	OMA09027	Yes	No	No	No	No	No	No	No	No	NA	Lrrc6 leucine rich repeat containing 6 (testis)	protein tilB homolog	protein tilB homolog	leucine-rich repeat-containing protein 6 [Gallus gallus]
ENSMUSG00000022376	OMA03399	Yes	No	No	No	NA	NA	NA	NA	NA	NA	Adcy8 adenylate cyclase 8	PREDICTED: adenylate cyclase type 8	NA	NA
ENSMUSG00000022377	OMA00740	No	No	No	No	No	No	Rep:0.85	No	No	NA	Asap1 ArfGAP with SH3 domain, ankyrin repeat and PH domain1	arf-GAP with SH3 domain, ANK repeat and PH domain-containing protein 1	arf-GAP with SH3 domain, ANK repeat and PH domain-containing protein 2 isoform X6	ArfGAP with SH3 domain, ankyrin repeat and PH domain 2 [Zonotrichia albicollis]
ENSMUSG00000022382	OMA06958	No	No	No	No	Yes	Yes	No	NA	NA	NA	Wnt7b wingless-type MMTV integration site family, member 7B	protein Wnt-7b	protein Wnt-7b	NA
ENSMUSG00000022386	OMA06757	No	No	No	No	No	No	No	NA	NA	Yes	Trmu tRNA 5-methylaminomethyl-2-thiouridylate methyltransferase	PREDICTED: mitochondrial tRNA-specific 2-thiouridylase 1	mitochondrial tRNA-specific 2-thiouridylase 1-like isoform X1	NA
ENSMUSG00000022400	OMA15179	No	No	No	No	No	No	No	No	No	Yes	Rbx1 ring-box 1	PREDICTED: E3 ubiquitin-protein ligase RBX1	RING-box protein 1	Protein BM-RBX-1 [Brugia malayi]
ENSMUSG00000022407	OMA04227	No	No	No	No	NA	No	Act:-1.34	No	No	NA	Adsl adenylosuccinate lyase	adenylosuccinate lyase	adenylosuccinate lyase-like	adenylosuccinate lyase [Xenopus laevis]
ENSMUSG00000022415	OMA11797	No	No	No	No	No	No	No	NA	NA	Yes	Syngr1 synaptogyrin 1	synaptogyrin-1	synaptogyrin-3	NA
ENSMUSG00000022422	OMA08336	Yes	No	No	No	No	No	No	No	No	No	Dscc1 DNA replication and sister chromatid cohesion 1	sister chromatid cohesion protein DCC1	sister chromatid cohesion protein DCC1	sister chromatid cohesion protein DCC1 [Xenopus (Silurana) tropicalis]
ENSMUSG00000022425	OMA01776	No	No	Yes	No	Yes	No	No	No	No	No	Enpp2 ectonucleotide pyrophosphatase/phosphodiesterase 2	ectonucleotide pyrophosphatase/phosphodiesterase family member 2	venom phosphodiesterase 2	Ectonucleotide pyrophosphatase/phosphodiesterase family member 3 [Crassostrea gigas]
ENSMUSG00000022426	OMA11800	No	No	No	No	NA	No	No	Yes	No	NA	Josd1 Josephin domain containing 1	josephin-1	josephin-2	josephin-1 [Anopheles darlingi]
ENSMUSG00000022427	OMA18827	No	No	No	No	No	No	Act:-1.41	No	No	NA	Tomm22 translocase of outer mitochondrial membrane 22 homolog (yeast)	mitochondrial import receptor subunit TOM22 homolog	protein TsetseEP-like	GF10253 [Drosophila ananassae]
ENSMUSG00000022429	OMA05868	No	No	No	Rep:1.19	NA	No	Rep:3.36	No	No	No	Dmc1 DNA meiotic recombinase 1	PREDICTED: meiotic recombination protein DMC1/LIM15 homolog	meiotic recombination protein DMC1/LIM15 homolog	Meiotic recombination protein DMC1/LIM15 like protein [Pteropus alecto]
ENSMUSG00000022433	OMA05350	Yes	No	Yes	No	No	NA	NA	No	No	NA	Csnk1e casein kinase 1, epsilon	casein kinase I	NA	hCG2014051, isoform CRA_c [Homo sapiens]
ENSMUSG00000022443	OMA00147	Yes	No	No	No	Yes	No	Act:-0.60	No	No	No	Myh9 myosin, heavy polypeptide 9, non-muscle	PREDICTED: LOW QUALITY PROTEIN: myosin-9	myosin-10 isoform X2	nonmuscle myosin heavy chain [Gallus gallus]
ENSMUSG00000022449	OMA06432	Yes	No	NA	NA	Yes	NA	NA	NA	NA	NA	Adamts20 a disintegrin-like and metallopeptidase (reprolysin type) with thrombospondin type 1 motif, 20	NA	NA	NA
ENSMUSG00000022451	OMA06814	No	No	No	No	No	No	Act:-0.90	No	No	No	Twf1 twinfilin actin binding protein 1	twinfilin-1	twinfilin-1	twinfilin 1 isoform 1 [Gallus gallus]
ENSMUSG00000022452	OMA22127	No	No	No	No	NA	NA	NA	Yes	No	NA	Smdt1 single-pass membrane protein with aspartate rich tail 1	essential MCU regulator, mitochondrial precursor	NA	essential MCU regulator, mitochondrial precursor [Bos taurus]
ENSMUSG00000022456	OMA05411	No	No	No	No	No	No	Act:-0.88	No	No	No	Sept3 septin 3	PREDICTED: neuronal-specific septin-3 isoform X1	neuronal-specific septin-3 isoform X1	septin 9 [Capsaspora owczarzaki ATCC 30864]
ENSMUSG00000022464	OMA05286	Yes	No	No	No	Yes	No	Act:-0.84	No	No	NA	Slc38a4 solute carrier family 38, member 4	sodium-coupled neutral amino acid transporter 4	probable sodium-coupled neutral amino acid transporter 6 isoform X2	transmembrane amino acid transporter family protein [Medicago truncatula]
ENSMUSG00000022474	OMA10455	No	No	No	No	NA	No	Act:-0.84	No	No	No	Pmm1 phosphomannomutase 1	phosphomannomutase 1	phosphomannomutase-like	probable phosphomannomutase [Piriformospora indica DSM 11827]
ENSMUSG00000022479	OMA06565	No	No	No	No	Yes	NA	NA	NA	NA	NA	Vdr vitamin D (1,25-dihydroxyvitamin D3) receptor	PREDICTED: vitamin D3 receptor	NA	NA
ENSMUSG00000022483	OMA00318	No	Rep:1.93	No	No	Yes	No	No	NA	NA	NA	Col2a1 collagen, type II, alpha 1	collagen alpha-1(II) chain precursor	alpha-1 collagen isoform X1	NA
ENSMUSG00000022485	OMA13228	No	No	Yes	No	NA	NA	NA	No	No	NA	Hoxc5 homeobox C5	PREDICTED: homeobox protein Hox-C5	NA	HoxC/Anthox7
ENSMUSG00000022489	OMA03630	No	Rep:1.48	No	No	Yes	No	No	No	No	NA	Pde1b phosphodiesterase 1B, Ca2+-calmodulin dependent	calcium/calmodulin-dependent 3',5'-cyclic nucleotide phosphodiesterase 1B	phosphodiesterase 1	Calcium/calmodulin-dependent 3',5'-cyclic nucleotide phosphodiesterase 1C [Camponotus floridanus]
ENSMUSG00000022500	OMA19864	Yes	No	Yes	No	NA	No	No	No	No	NA	Litaf LPS-induced TN factor	lipopolysaccharide-induced tumor necrosis factor-alpha factor homolog	cell death-inducing p53-target protein 1	lipopolysaccharide-induced TNF factor 3 [Mytilus galloprovincialis]
ENSMUSG00000022504	OMA12273	Yes	No	No	No	NA	NA	NA	NA	NA	NA	Ciita class II transactivator	PREDICTED: MHC class II transactivator	NA	NA
ENSMUSG00000022507	OMA07826	Yes	No	No	No	No	No	No	No	No	NA	1810013L24Rik RIKEN cDNA 1810013L24 gene	UPF0472 protein C16orf72 homolog	UPF0472 protein C16orf72 homolog	UPF0472 protein C16orf72 homolog [Xenopus laevis]
ENSMUSG00000022508	OMA03872	Yes	No	No	No	NA	NA	NA	NA	NA	NA	Bcl6 B cell leukemia/lymphoma 6	B-cell lymphoma 6 protein	NA	NA
ENSMUSG00000022510	OMA02420	Yes	No	No	No	Yes	No	No	No	No	No	Trp63 transformation related protein 63	PREDICTED: tumor protein 63 isoform X1	cellular tumor antigen p53 isoform X1	p53 tumor suppressor-like protein [Mytilus trossulus]
ENSMUSG00000022518	OMA25267	No	No	NA	NA	NA	No	Rep:0.83	NA	NA	NA	4930562C15Rik RIKEN cDNA 4930562C15 gene	NA	uncharacterized protein LOC755388 isoform X2	NA
ENSMUSG00000022519	OMA03776	No	No	No	No	No	NA	NA	NA	NA	NA	Srl sarcalumenin	PREDICTED: sarcalumenin isoform X1	NA	NA
ENSMUSG00000022521	OMA00150	No	No	No	No	No	No	Rep:1.16	No	No	No	Crebbp CREB binding protein	CREB binding protein	CREB-binding protein isoform X8	Histone acetyltransferase p300 [Dicentrarchus labrax]
ENSMUSG00000022528	OMA11017	No	No	Yes	No	No	No	No	NA	NA	NA	Hes1 hairy and enhancer of split 1 (Drosophila)	transcription factor HES-1	hairy and enhancer of split	NA
ENSMUSG00000022533	OMA00851	No	No	No	No	No	No	Act:-0.99	Yes	No	No	Atp13a3 ATPase type 13A3	PREDICTED: probable cation-transporting ATPase 13A3 isoform X1	probable cation-transporting ATPase 13A3 isoform X2	putative cation-transporting ATPase 13A3 [Opisthocomus hoazin]
ENSMUSG00000022536	OMA03953	No	No	No	No	No	No	Rep:0.51	NA	NA	No	Glyr1 glyoxylate reductase 1 homolog (Arabidopsis)	putative oxidoreductase GLYR1	putative oxidoreductase GLYR1 isoform X1	NA
ENSMUSG00000022538	OMA04546	No	No	No	No	No	No	Rep:1.10	No	No	No	Lsg1 large 60S subunit nuclear export GTPase 1	PREDICTED: large subunit GTPase 1 homolog isoform X1	large subunit GTPase 1 homolog	LOC100145528 protein [Xenopus (Silurana) tropicalis]
ENSMUSG00000022542	OMA13307	No	No	Yes	No	NA	NA	NA	NA	NA	NA	Sept12 septin 12	septin-12	NA	NA
ENSMUSG00000022544	OMA15786	No	No	No	No	No	No	Rep:1.42	NA	NA	No	Eef2kmt eukaryotic elongation factor 2 lysine methyltransferase	PREDICTED: protein-lysine N-methyltransferase EEF2KMT	protein-lysine N-methyltransferase EEF2KMT	NA
ENSMUSG00000022545	OMA02013	Yes	No	Yes	No	No	No	No	No	No	No	Ercc4 excision repair cross-complementing rodent repair deficiency, complementation group 4	PREDICTED: DNA repair endonuclease XPF	DNA repair endonuclease XPF	DNA repair endonuclease XPF;
ENSMUSG00000022551	OMA09273	No	No	No	No	No	No	No	No	No	Yes	Cyc1 cytochrome c-1	cytochrome c-1	cytochrome c1, heme protein, mitochondrial	mitochondrial cytochrome c1 heme protein [Ictalurus furcatus]
ENSMUSG00000022561	OMA04771	No	No	No	No	No	No	Rep:0.71	No	No	No	Gpaa1 GPI anchor attachment protein 1	glycosylphosphatidylinositol anchor attachment 1 protein	glycosylphosphatidylinositol anchor attachment 1 protein-like	Glycosylphosphatidylinositol anchor attachment 1 protein [Crassostrea gigas]
ENSMUSG00000022564	OMA18021	No	No	NA	NA	NA	No	Act:-0.98	NA	NA	NA	Grina glutamate receptor, ionotropic, N-methyl D-aspartate-associated protein 1 (glutamate binding)	NA	protein lifeguard 1 isoform X3	NA
ENSMUSG00000022570	OMA09834	No	No	NA	NA	No	No	Act:-0.71	No	No	NA	Tsta3 tissue specific transplantation antigen P35B	NA	GDP-L-fucose synthase	GDP-L-fucose synthase [Tupaia chinensis]
ENSMUSG00000022574	OMA07851	Yes	No	No	No	No	No	Rep:0.69	No	No	NA	Naprt nicotinate phosphoribosyltransferase	nicotinate phosphoribosyltransferase	nicotinate phosphoribosyltransferase isoform X2	Nicotinate phosphoribosyltransferase [Crassostrea gigas]
ENSMUSG00000022587	NA	Yes	No	NA	NA	NA	NA	NA	NA	NA	NA	Ly6e lymphocyte antigen 6 complex, locus E	NA	NA	NA
ENSMUSG00000022607	OMA00583	No	No	Yes	No	Yes	No	No	No	No	NA	Ptk2 PTK2 protein tyrosine kinase 2	PREDICTED: focal adhesion kinase 1 isoform X10	focal adhesion kinase 1 isoform X2	FAK FAK
ENSMUSG00000022610	OMA07566	No	Rep:1.02	No	No	NA	NA	NA	NA	NA	NA	Mapk12 mitogen-activated protein kinase 12	mitogen-activated protein kinase 12	NA	NA
ENSMUSG00000022614	OMA06482	No	No	No	No	No	No	No	No	Rep:1.84	NA	Lmf2 lipase maturation factor 2	lipase maturation factor 2	LOW QUALITY PROTEIN: lipase maturation factor 2	lipase maturation factor 2 [Xenopus laevis]
ENSMUSG00000022615	OMA11324	No	No	No	Rep:1.27	NA	No	No	No	No	NA	Tymp thymidine phosphorylase	thymidine phosphorylase	thymidine phosphorylase	Thymidine phosphorylase [Crassostrea gigas]
ENSMUSG00000022620	OMA08599	Yes	No	No	No	NA	Yes	No	NA	NA	NA	Arsa arylsulfatase A	PREDICTED: arylsulfatase A	arylsulfatase A	NA
ENSMUSG00000022621	OMA12410	Yes	No	No	No	No	No	No	No	No	NA	Rabl2 RAB, member RAS oncogene family-like 2	rab-like protein 2B	rab-like protein 2A	rab-like protein 2B [Danio rerio]
ENSMUSG00000022629	OMA00368	No	No	No	No	No	No	No	Yes	No	NA	Kif21a kinesin family member 21A	kinesin-like protein KIF21A	kinesin-like protein KIF21A isoform X9	Kinesin-like protein KIF21B [Harpegnathos saltator]
ENSMUSG00000022636	OMA07801	Yes	No	No	No	No	NA	NA	NA	NA	NA	Alcam activated leukocyte cell adhesion molecule	CD166 antigen precursor	NA	NA
ENSMUSG00000022637	OMA01426	Yes	No	No	No	No	No	No	No	No	No	Cblb Casitas B-lineage lymphoma b	E3 ubiquitin-protein ligase CBL-B	E3 ubiquitin-protein ligase CBL isoform X2	E3 ubiquitin ligase, putative [Ixodes scapularis]
ENSMUSG00000022650	OMA26833	Yes	No	NA	NA	NA	NA	NA	No	No	NA	Retnlb resistin like beta	NA	NA	resistin-like gamma precursor [Mus musculus]
ENSMUSG00000022652	OMA10590	No	Act:-8.02	No	Rep:1.26	NA	NA	NA	NA	NA	NA	Morc1 microrchidia 1	PREDICTED: MORC family CW-type zinc finger protein 1	NA	NA
ENSMUSG00000022658	OMA16072	No	No	Yes	No	No	No	No	NA	NA	NA	Tagln3 transgelin 3	transgelin-2	transgelin-3-like isoform X2	NA
ENSMUSG00000022663	OMA07080	No	No	No	No	No	No	No	No	Rep:1.02	No	Atg3 autophagy related 3	ubiquitin-like-conjugating enzyme ATG3	ubiquitin-like-conjugating enzyme ATG3	autophagy-related protein 3 [Ictalurus furcatus]
ENSMUSG00000022673	OMA01257	No	No	No	No	No	No	Act:-0.69	Yes	No	No	Mcm4 minichromosome maintenance complex component 4	DNA replication licensing factor mcm4	DNA replication licensing factor mcm4-A	DNA replication licensing factor mcm4 [Xenopus (Silurana) tropicalis]
ENSMUSG00000022674	OMA13637	No	No	No	No	No	No	Act:-0.57	No	No	No	Ube2v2 ubiquitin-conjugating enzyme E2 variant 2	ubiquitin-conjugating enzyme E2 variant 2	ubiquitin-conjugating enzyme E2 variant 2-like	ubiquitin-conjugating enzyme E2 variant 2 [Danio rerio]
ENSMUSG00000022676	OMA07884	No	No	Yes	No	NA	No	No	No	Rep:1.65	NA	Snai2 snail family zinc finger 2	zinc finger protein SNAI2	zinc-finger transcription factor Snail	SnailA
ENSMUSG00000022678	OMA11061	No	No	No	No	NA	NA	NA	Yes	No	No	Nde1 nudE neurodevelopment protein 1	PREDICTED: nuclear distribution protein nudE homolog 1	NA	Nuclear distribution protein nudE-like 1 [Chlamydotis undulata macqueenii]
ENSMUSG00000022680	OMA03572	No	No	No	No	NA	No	Rep:0.49	No	No	No	Pdxdc1 pyridoxal-dependent decarboxylase domain containing 1	PREDICTED: pyridoxal-dependent decarboxylase domain-containing protein 1	putative pyridoxal-dependent decarboxylase domain-containing protein 2 isoform X1	Pyridoxal-dependent decarboxylase domain-containing protein 1 [Crassostrea gigas]
ENSMUSG00000022682	OMA04408	No	No	No	No	Yes	No	No	No	No	Yes	Rrn3 RRN3 RNA polymerase I transcription factor homolog (yeast)	PREDICTED: RNA polymerase I-specific transcription initiation factor RRN3	RNA polymerase I-specific transcription initiation factor RRN3	RNA polymerase I-specific transcription initiation factor RRN3 [Crassostrea gigas]
ENSMUSG00000022686	OMA10019	No	No	No	No	No	No	No	No	Rep:1.21	NA	B3gnt5 UDP-GlcNAc:betaGal beta-1,3-N-acetylglucosaminyltransferase 5	lactosylceramide 1,3-N-acetyl-beta-D-glucosaminyltransferase precursor	beta-1,3-galactosyltransferase 1	PREDICTED: beta-1,3-galactosyltransferase 1 [Calypte anna]
ENSMUSG00000022687	OMA02125	Yes	Rep:1.54	No	No	NA	NA	NA	No	No	NA	Boc biregional cell adhesion molecule-related/down-regulated by oncogenes (Cdon) binding protein	brother of CDO precursor	NA	Protein HIM-4, isoform a [Caenorhabditis elegans]
ENSMUSG00000022698	OMA11644	No	No	No	No	NA	No	Act:-0.90	No	No	No	Naa50 N(alpha)-acetyltransferase 50, NatE catalytic subunit	N-alpha-acetyltransferase 50	N-alpha-acetyltransferase 50	N-alpha-acetyltransferase 50 [Danio rerio]
ENSMUSG00000022702	OMA01152	No	No	No	No	No	No	No	No	Rep:1.80	NA	Hira histone cell cycle regulator	PREDICTED: protein HIRA	protein HIRA	HIRA protein [Homo sapiens]
ENSMUSG00000022707	OMA02913	No	No	No	No	No	No	Rep:0.99	No	No	No	Gbe1 glucan (1,4-alpha-), branching enzyme 1	PREDICTED: 1,4-alpha-glucan-branching enzyme	1,4-alpha-glucan-branching enzyme isoform X2	1,4-alpha-glucan branching enzyme [Homo sapiens]
ENSMUSG00000022708	OMA02490	Yes	No	No	No	NA	NA	NA	NA	NA	NA	Zbtb20 zinc finger and BTB domain containing 20	PREDICTED: zinc finger and BTB domain-containing protein 20	NA	NA
ENSMUSG00000022721	OMA06625	No	No	No	No	No	No	No	Yes	No	No	Trmt2a TRM2 tRNA methyltransferase 2A	tRNA (uracil-5-)-methyltransferase homolog A	tRNA (uracil-5-)-methyltransferase homolog A-like	tRNA methyltransferase 2 homolog A [Callorhinchus milii]
ENSMUSG00000022722	OMA11794	Yes	No	No	No	No	No	No	No	No	NA	Arl6 ADP-ribosylation factor-like 6	PREDICTED: ADP-ribosylation factor-like protein 6	ADP-ribosylation factor-like protein 6	ADP-ribosylation factor-like protein 6 [Saccoglossus kowalevskii]
ENSMUSG00000022724	OMA11124	No	No	No	No	Yes	No	No	Yes	No	NA	Riox2 ribosomal oxygenase 2	PREDICTED: bifunctional lysine-specific demethylase and histidyl-hydroxylase MINA isoform X1	ribosomal oxygenase 2 isoform X2	bifunctional lysine-specific demethylase and histidyl-hydroxylase MINA isoform a [Homo sapiens]
ENSMUSG00000022738	OMA23782	No	No	NA	NA	Yes	NA	NA	NA	NA	NA	Gsc2 goosecoid homebox 2	NA	NA	NA
ENSMUSG00000022742	OMA08089	No	No	Yes	No	NA	Yes	No	No	No	Yes	Cpox coproporphyrinogen oxidase	PREDICTED: oxygen-dependent coproporphyrinogen-III oxidase, mitochondrial	oxygen-dependent coproporphyrinogen-III oxidase	coproporphyrinogen iii oxidase [Aedes aegypti]
ENSMUSG00000022748	OMA14733	Yes	No	No	No	No	No	No	Yes	No	No	Cmss1 cms small ribosomal subunit 1	protein CMSS1	uncharacterized protein C3orf26 homolog	protein CMSS1 [Mus musculus]
ENSMUSG00000022753	OMA15382	No	No	No	Act:-1.92	NA	NA	NA	NA	NA	NA	Tmem30c transmembrane protein 30C	transmembrane protein 30C, pseudogene	NA	NA
ENSMUSG00000022765	OMA16467	No	No	No	No	No	No	Rep:0.53	NA	NA	NA	Snap29 synaptosomal-associated protein 29	synaptosomal-associated protein 29	synaptosomal-associated protein 29	NA
ENSMUSG00000022770	OMA01210	No	No	Yes	No	Yes	NA	NA	NA	NA	NA	Dlg1 discs, large homolog 1 (Drosophila)	disks large homolog 1	NA	NA
ENSMUSG00000022771	OMA04355	No	No	No	No	No	No	No	Yes	No	No	Ppil2 peptidylprolyl isomerase (cyclophilin)-like 2	peptidyl-prolyl cis-trans isomerase-like 2	RING-type E3 ubiquitin-protein ligase PPIL2	PREDICTED: peptidyl-prolyl cis-trans isomerase-like 2 [Myotis brandtii]
ENSMUSG00000022772	OMA08587	Yes	No	No	No	NA	NA	NA	NA	NA	NA	Senp5 SUMO/sentrin specific peptidase 5	PREDICTED: sentrin-specific protease 5	NA	NA
ENSMUSG00000022781	OMA03193	No	No	No	No	NA	No	Rep:0.60	NA	NA	NA	Pak2 p21 protein (Cdc42/Rac)-activated kinase 2	PREDICTED: serine/threonine-protein kinase PAK 2	serine/threonine-protein kinase PAK 3 isoform X1	NA
ENSMUSG00000022783	OMA02924	No	No	No	No	Yes	No	Act:-0.60	No	No	NA	Spag6l sperm associated antigen 6-like	sperm-associated antigen 6	sperm-associated antigen 6	Sperm-associated antigen 6 [Crassostrea gigas]
ENSMUSG00000022788	OMA04618	Yes	No	No	No	NA	No	No	NA	NA	NA	Fgd4 FYVE, RhoGEF and PH domain containing 4	PREDICTED: FYVE, RhoGEF and PH domain-containing protein 4	FYVE, RhoGEF and PH domain-containing protein 4 isoform X5	NA
ENSMUSG00000022789	OMA01601	No	No	No	No	No	No	Rep:0.59	No	No	No	Dnm1l dynamin 1-like	PREDICTED: dynamin-1-like protein isoform X1	dynamin-1-like protein isoform X2	Dynamin-1-like protein [Pteropus alecto]
ENSMUSG00000022791	OMA01820	No	No	Yes	No	NA	No	No	Yes	No	NA	Tnk2 tyrosine kinase, non-receptor, 2	activated CDC42 kinase 1	activated CDC42 kinase 1	Activated CDC42 kinase 1;
ENSMUSG00000022799	OMA05207	No	No	Yes	No	NA	NA	NA	NA	NA	NA	Arhgap31 Rho GTPase activating protein 31	PREDICTED: rho GTPase-activating protein 31, partial	NA	NA
ENSMUSG00000022805	OMA03940	No	Act:-8.43	No	No	No	No	No	No	No	NA	Maats1 MYCBP-associated, testis expressed 1	protein MAATS1	cilia- and flagella-associated protein 91	AMY-1-associating protein expressed in testis 1-like [Cricetulus griseus]
ENSMUSG00000022808	OMA11134	Yes	No	NA	NA	No	No	No	No	No	NA	Snx4 sorting nexin 4	NA	sorting nexin-4 isoform X3	sorting nexin-4 [Danio rerio]
ENSMUSG00000022809	OMA13271	No	No	No	No	Yes	NA	NA	NA	NA	NA	Nr1i2 nuclear receptor subfamily 1, group I, member 2	nuclear receptor subfamily 1 group I member 2	NA	NA
ENSMUSG00000022814	OMA08910	No	No	No	No	Yes	No	No	No	No	No	Umps uridine monophosphate synthetase	PREDICTED: uridine 5'-monophosphate synthase	uridine 5'-monophosphate synthase	orotidine 5'-phosphate decarboxylase [Helicosporidium sp. ATCC 50920]
ENSMUSG00000022821	OMA04971	No	No	No	No	No	No	No	No	No	Yes	Hgd homogentisate 1, 2-dioxygenase	homogentisate 1,2-dioxygenase	homogentisate 1,2-dioxygenase isoform X2	Homogentisate 1,2-dioxygenase [Zootermopsis nevadensis]
ENSMUSG00000022822	OMA00448	No	No	No	No	NA	No	No	No	No	NA	Abcc5 ATP-binding cassette, sub-family C (CFTR/MRP), member 5	multidrug resistance-associated protein 5	multidrug resistance-associated protein 5 isoform X1	multidrug resistance protein, putative [Pediculus humanus corporis]
ENSMUSG00000022836	OMA03440	No	No	No	Rep:1.11	NA	NA	NA	NA	NA	NA	Mylk myosin, light polypeptide kinase	PREDICTED: myosin light chain kinase, smooth muscle-like, partial	NA	NA
ENSMUSG00000022844	OMA06411	Yes	No	NA	NA	NA	Yes	Act:-0.39	No	No	NA	Pdia5 protein disulfide isomerase associated 5	NA	protein disulfide-isomerase A5	Protein disulfide-isomerase A5 [Crassostrea gigas]
ENSMUSG00000022848	OMA05436	Yes	No	No	No	No	No	No	No	Rep:1.13	NA	Dirc2 disrupted in renal carcinoma 2 (human)	disrupted in renal carcinoma protein 2 homolog	solute carrier family 49 member 4 homolog	Major Facilitator Superfamily protein [Tetrahymena thermophila]
ENSMUSG00000022849	OMA15225	No	No	No	Rep:1.43	No	No	No	NA	NA	NA	Hspbap1 Hspb associated protein 1	PREDICTED: HSPB1-associated protein 1	HSPB1-associated protein 1	NA
ENSMUSG00000022853	OMA06152	Yes	No	No	No	No	No	Act:-1.44	NA	NA	No	Ehhadh enoyl-Coenzyme A, hydratase/3-hydroxyacyl Coenzyme A dehydrogenase	PREDICTED: peroxisomal bifunctional enzyme	peroxisomal bifunctional enzyme isoform X1	NA
ENSMUSG00000022857	OMA04133	No	No	No	No	NA	No	Rep:5.99	NA	NA	NA	Tmprss15 transmembrane protease, serine 15	PREDICTED: enteropeptidase	uncharacterized protein LOC105442295	NA
ENSMUSG00000022860	OMA11788	No	Act:-4.48	No	No	NA	NA	NA	NA	NA	NA	Chodl chondrolectin	chondrolectin precursor	NA	NA
ENSMUSG00000022861	OMA19210	Yes	No	NA	NA	NA	NA	NA	NA	NA	No	Dgkg diacylglycerol kinase, gamma	NA	NA	NA
ENSMUSG00000022865	OMA11198	No	No	No	Rep:1.07	NA	NA	NA	NA	NA	NA	Cxadr coxsackie virus and adenovirus receptor	coxsackievirus and adenovirus receptor precursor	NA	NA
ENSMUSG00000022871	OMA21990	No	No	No	Act:-1.54	NA	NA	NA	NA	NA	NA	Fetub fetuin beta	PREDICTED: fetuin-B	NA	NA
ENSMUSG00000022878	OMA15082	Yes	No	No	No	NA	NA	NA	No	No	NA	Adipoq adiponectin, C1Q and collagen domain containing	adiponectin, C1Q and collagen domain containing precursor	NA	Collagen triple helix repeat containing 1
ENSMUSG00000022883	OMA00259	Yes	No	No	No	NA	Yes	No	No	No	NA	Robo1 roundabout guidance receptor 1	roundabout homolog 1 precursor	roundabout homolog 1 isoform X2	roundabout homolog 1-like isoform X3 [Exaiptasia pallida]
ENSMUSG00000022885	OMA14434	Yes	No	No	No	NA	NA	NA	NA	NA	NA	St6gal1 beta galactoside alpha 2,6 sialyltransferase 1	beta-galactoside alpha-2,6-sialyltransferase 1	NA	NA
ENSMUSG00000022892	OMA01772	Yes	No	Yes	No	NA	No	No	No	No	NA	App amyloid beta (A4) precursor protein	amyloid beta A4 protein precursor	amyloid-like protein 1 isoform X1	amyloid beta (A4) precursor-like protein 2, isoform CRA_d [Homo sapiens]
ENSMUSG00000022893	OMA01903	No	No	No	No	Yes	NA	NA	NA	NA	NA	Adamts1 a disintegrin-like and metallopeptidase (reprolysin type) with thrombospondin type 1 motif, 1	A disintegrin and metalloproteinase with thrombospondin motifs 1 precursor	NA	NA
ENSMUSG00000022894	OMA01727	No	No	Yes	Act:-1.25	NA	NA	NA	NA	NA	NA	Adamts5 a disintegrin-like and metallopeptidase (reprolysin type) with thrombospondin type 1 motif, 5 (aggrecanase-2)	PREDICTED: A disintegrin and metalloproteinase with thrombospondin motifs 5	NA	NA
ENSMUSG00000022895	OMA07281	Yes	Act:-1.13	Yes	No	NA	NA	NA	NA	NA	NA	Ets2 E26 avian leukemia oncogene 2, 3' domain	protein C-ets-2	NA	NA
ENSMUSG00000022897	OMA01175	Yes	No	No	No	Yes	No	No	No	No	No	Dyrk1a dual-specificity tyrosine-(Y)-phosphorylation regulated kinase 1a	dual specificity tyrosine-phosphorylation-regulated kinase 1A	dual specificity tyrosine-phosphorylation-regulated kinase 1A isoform X1	PREDICTED: dual specificity tyrosine-phosphorylation-regulated kinase 1A isoform X1 [Homo sapiens]
ENSMUSG00000022901	OMA26859	No	No	No	Rep:1.79	NA	NA	NA	NA	NA	NA	Cd86 CD86 antigen	PREDICTED: T-lymphocyte activation antigen CD86-like	NA	NA
ENSMUSG00000022911	OMA07583	No	No	No	No	NA	No	Rep:0.67	NA	NA	NA	Arl13b ADP-ribosylation factor-like 13B	ADP-ribosylation factor-like protein 13B	ADP-ribosylation factor-like protein 13B isoform X1	NA
ENSMUSG00000022935	OMA00836	Yes	No	No	No	NA	No	No	No	No	NA	Grik1 glutamate receptor, ionotropic, kainate 1	PREDICTED: glutamate receptor ionotropic, kainate 1 isoform X1	glutamate receptor ionotropic, kainate 2, partial	glutamate receptor subunit 4 isoform 4 precursor [Trachemys scripta elegans]
ENSMUSG00000022946	OMA00277	No	No	No	No	Yes	NA	NA	NA	NA	NA	Dopey2 dopey family member 2	PREDICTED: protein dopey-2	NA	NA
ENSMUSG00000022947	OMA18816	No	No	NA	NA	NA	No	Act:-1.56	NA	NA	NA	Cbr3 carbonyl reductase 3	NA	carbonyl reductase	NA
ENSMUSG00000022949	OMA10849	No	No	Yes	No	Yes	NA	NA	No	No	NA	Clic6 chloride intracellular channel 6	PREDICTED: chloride intracellular channel protein 6	NA	PREDICTED: chloride intracellular channel protein 3 [Cricetulus griseus]
ENSMUSG00000022952	OMA04191	No	No	Yes	No	NA	NA	NA	NA	NA	NA	Runx1 runt related transcription factor 1	PREDICTED: runt-related transcription factor 1 isoform X1	NA	NA
ENSMUSG00000022956	OMA15832	No	No	No	No	No	No	Act:-1.43	No	No	No	Atp5o ATP synthase, H+ transporting, mitochondrial F1 complex, O subunit	ATP synthase subunit O, mitochondrial	ATP synthase subunit O, mitochondrial-like	putative mitochondrial ATP synthase O subunit [Taeniopygia guttata]
ENSMUSG00000022957	OMA00210	No	No	No	No	Yes	No	No	No	No	No	Itsn1 intersectin 1 (SH3 domain protein 1A)	PREDICTED: intersectin-1 isoform X1	intersectin-1	Intersectin-1 [Acromyrmex echinatior]
ENSMUSG00000022973	OMA00598	No	No	No	No	NA	No	Rep:0.67	No	No	NA	Synj1 synaptojanin 1	PREDICTED: synaptojanin-1 isoform X1	synaptojanin-1	Synaptojanin-1 [Fukomys damarensis]
ENSMUSG00000022982	OMA18311	No	No	No	No	No	No	Act:-0.68	No	No	Yes	Sod1 superoxide dismutase 1, soluble	superoxide dismutase	superoxide dismutase	Cu/Zn-superoxide dismutase [Haliotis discus discus]
ENSMUSG00000022993	OMA27669	Yes	No	No	No	NA	NA	NA	NA	NA	NA	4930415O20Rik RIKEN cDNA 4930415O20 gene	PREDICTED: uncharacterized protein LOC100490937 isoform X1	NA	NA
ENSMUSG00000022995	OMA04606	No	No	No	No	No	No	Act:-0.54	NA	NA	NA	Enah enabled homolog (Drosophila)	protein enabled homolog	protein enabled homolog isoform X8	NA
ENSMUSG00000022997	OMA07995	No	No	No	Rep:1.25	NA	No	No	NA	NA	NA	Wnt1 wingless-type MMTV integration site family, member 1	PREDICTED: proto-oncogene Wnt-1	protein Wnt-1 precursor	NA
ENSMUSG00000023000	NA	No	Act:-7.69	NA	NA	NA	NA	NA	NA	NA	NA	Dhh desert hedgehog	NA	NA	NA
ENSMUSG00000023010	OMA11718	No	No	No	No	No	No	Act:-0.62	No	No	No	Tmbim6 transmembrane BAX inhibitor motif containing 6	bax inhibitor 1	probable Bax inhibitor 1	TPA_inf: Bax-mediated apoptosis inhibitor TEGT/BI-1 [Amblyomma variegatum]
ENSMUSG00000023011	OMA10898	No	No	No	No	No	No	Rep:0.57	No	No	NA	Faim2 Fas apoptotic inhibitory molecule 2	protein lifeguard 2	protein lifeguard 1-like isoform X1	Fas apoptotic inhibitory molecule 2 [Xenopus (Silurana) tropicalis]
ENSMUSG00000023013	OMA12822	No	No	No	No	NA	No	Act:-0.56	No	No	NA	Aqp2 aquaporin 2	aquaporin 2	lens fiber major intrinsic protein-like isoform X1	PREDICTED: aquaporin-4 isoform X1 [Mus musculus]
ENSMUSG00000023015	OMA04727	No	No	No	No	No	No	Rep:0.74	No	No	NA	Racgap1 Rac GTPase-activating protein 1	rac GTPase-activating protein 1	rac GTPase-activating protein 1-like isoform X1	Rac GTPase activating protein 1 [Xenopus (Silurana) tropicalis]
ENSMUSG00000023017	OMA03740	No	No	Yes	No	No	No	No	No	No	NA	Asic1 acid-sensing (proton-gated) ion channel 1	PREDICTED: acid-sensing ion channel 1	acid-sensing ion channel 1A-like	acid-sensing ion channel 2 isoform MDEG1 [Homo sapiens]
ENSMUSG00000023018	OMA02464	No	No	No	No	No	No	Act:-0.65	No	No	No	Smarcd1 SWI/SNF related, matrix associated, actin dependent regulator of chromatin, subfamily d, member 1	SWI/SNF-related matrix-associated actin-dependent regulator of chromatin subfamily D member 1	SWI/SNF-related matrix-associated actin-dependent regulator of chromatin subfamily D member 1-like	SWI/SNF-related matrix-associated actin-dependent regulator of chromatin subfamily D member 1 [Dicentrarchus labrax]
ENSMUSG00000023019	OMA07202	No	No	Yes	No	NA	NA	NA	NA	NA	NA	Gpd1 glycerol-3-phosphate dehydrogenase 1 (soluble)	glycerol-3-phosphate dehydrogenase	NA	NA
ENSMUSG00000023027	OMA12116	Yes	No	No	No	No	NA	NA	NA	NA	NA	Atf1 activating transcription factor 1	cyclic AMP-dependent transcription factor ATF-1	NA	NA
ENSMUSG00000023030	OMA03880	No	No	No	No	NA	No	No	Yes	Rep:1.93	Yes	Slc11a2 solute carrier family 11 (proton-coupled divalent metal ion transporters), member 2	natural resistance-associated macrophage protein 2	natural resistance-associated macrophage protein 2-like isoform X7	natural resistance-associated macrophage protein [Paralichthys olivaceus]
ENSMUSG00000023031	OMA12985	No	No	No	No	Yes	NA	NA	No	Act:-1.06	NA	Cela1 chymotrypsin-like elastase family, member 1	chymotrypsin like elastase family member 1 precursor	NA	PREDICTED: chymotrypsinogen B-like [Heterocephalus glaber]
ENSMUSG00000023032	OMA00712	No	No	Yes	No	Yes	No	No	NA	NA	NA	Slc4a8 solute carrier family 4 (anion exchanger), member 8	PREDICTED: electroneutral sodium bicarbonate exchanger 1	sodium bicarbonate cotransporter 3 isoform X5	NA
ENSMUSG00000023034	OMA05866	No	No	No	Rep:2.63	NA	NA	NA	NA	NA	NA	Nr4a1 nuclear receptor subfamily 4, group A, member 1	nuclear receptor subfamily 4 group A member 1	NA	NA
ENSMUSG00000023043++	OMA10793	Yes	No	Yes	No	NA	NA	NA	NA	NA	NA	Krt18 keratin 18	keratin, type I cytoskeletal 18	NA	NA
ENSMUSG00000023051	OMA09560	No	No	No	No	No	No	Rep:1.09	NA	NA	NA	Tarbp2 TARBP2, RISC loading complex RNA binding subunit	RISC-loading complex subunit tarbp2	interferon-inducible double-stranded RNA-dependent protein kinase activator A homolog A	NA
ENSMUSG00000023057	OMA18559	No	No	No	Act:-3.64	No	NA	NA	NA	NA	NA	Fabp2 fatty acid binding protein 2, intestinal	fatty acid-binding protein, intestinal	NA	NA
ENSMUSG00000023064	OMA19598	Yes	No	No	No	NA	NA	NA	NA	NA	NA	Sncg synuclein, gamma	gamma-synuclein	NA	NA
ENSMUSG00000023066	OMA00856	No	No	No	No	NA	No	No	Yes	No	NA	Rttn rotatin	PREDICTED: rotatin	rotatin	Rotatin [Pteropus alecto]
ENSMUSG00000023067	OMA26588	No	No	No	No	NA	NA	NA	Yes	No	NA	Cdkn1a cyclin-dependent kinase inhibitor 1A (P21)	PREDICTED: cyclin-dependent kinase inhibitor 1	NA	cyclin-dependent kinase inhibitor xic1 [Xenopus laevis]
ENSMUSG00000023072	OMA08068	Yes	No	No	No	NA	No	Rep:0.84	No	No	NA	Cep89 centrosomal protein 89	PREDICTED: centrosomal protein of 89 kDa isoform X1	centrosomal protein of 89 kDa	Centrosomal protein of 89 kDa [Nipponia nippon]
ENSMUSG00000023073	OMA09152	No	No	Yes	Rep:1.29	No	No	No	NA	NA	NA	Slc10a2 solute carrier family 10, member 2	PREDICTED: ileal sodium/bile acid cotransporter-like	ileal sodium/bile acid cotransporter-like	NA
ENSMUSG00000023074	OMA10961	No	No	No	No	No	No	Act:-1.15	NA	NA	NA	Mospd1 motile sperm domain containing 1	motile sperm domain-containing protein 1	motile sperm domain-containing protein 1	NA
ENSMUSG00000023079	OMA03662	Yes	No	No	No	NA	NA	NA	NA	NA	NA	Gtf2ird1 general transcription factor II I repeat domain-containing 1	PREDICTED: general transcription factor II-I repeat domain-containing protein 1 isoform X1	NA	NA
ENSMUSG00000023087	OMA07620	Yes	No	No	No	NA	No	No	No	No	No	Noct nocturnin	nocturnin	nocturnin isoform X1	Nocturnin [Cricetulus griseus]
ENSMUSG00000023088	OMA01888	Yes	No	NA	NA	NA	No	No	No	No	NA	Abcc1 ATP-binding cassette, sub-family C (CFTR/MRP), member 1	NA	ATP-binding cassette, sub-family C (CFTR/MRP), member 1 isoform X1	Multidrug resistance-associated protein 1 [Myotis davidii]
ENSMUSG00000023092	OMA11015	No	No	No	No	Yes	NA	NA	NA	NA	No	Fhl1 four and a half LIM domains 1	four and a half LIM domains protein 1	NA	NA
ENSMUSG00000023094	OMA17134	No	No	No	No	No	No	No	Yes	No	No	Msrb2 methionine sulfoxide reductase B2	methionine-R-sulfoxide reductase B2, mitochondrial	uncharacterized protein LOC105446639 isoform X1	methionine sulfoxide reductase B [Salinibacter ruber]
ENSMUSG00000023110	OMA02434	Yes	No	No	No	No	No	No	No	Rep:1.38	No	Prmt5 protein arginine N-methyltransferase 5	PREDICTED: protein arginine N-methyltransferase 5	protein arginine N-methyltransferase 5	Protein arginine N-methyltransferase 5;
ENSMUSG00000023143	OMA11498	No	No	No	No	No	No	No	Yes	No	No	Nagpa N-acetylglucosamine-1-phosphodiester alpha-N-acetylglucosaminidase	PREDICTED: N-acetylglucosamine-1-phosphodiester alpha-N-acetylglucosaminidase isoform X1	N-acetylglucosamine-1-phosphodiester alpha-N-acetylglucosaminidase	N-acetylglucosamine-1-phosphodiester alpha-N-acetylglucosaminidase precursor [Sus scrofa]
ENSMUSG00000023150	OMA02928	No	No	No	No	NA	No	Rep:0.50	NA	NA	NA	Ivns1abp influenza virus NS1A binding protein	PREDICTED: influenza virus NS1A-binding protein isoform X1	influenza virus NS1A-binding protein homolog	NA
ENSMUSG00000023175	OMA15017	No	No	No	No	NA	NA	NA	Yes	No	NA	Bsg basigin	basigin precursor	NA	cell adhesion molecule, putative [Ixodes scapularis]
ENSMUSG00000023176	OMA20559	No	No	NA	NA	NA	NA	NA	NA	NA	Yes	Cpn2 carboxypeptidase N, polypeptide 2	NA	NA	NA
ENSMUSG00000023206	NA	Yes	No	NA	NA	NA	NA	NA	NA	NA	NA	Il15ra interleukin 15 receptor, alpha chain	NA	NA	NA
ENSMUSG00000023224	NA	Yes	No	NA	NA	NA	NA	NA	NA	NA	NA	Serping1 serine (or cysteine) peptidase inhibitor, clade G, member 1	NA	NA	NA
ENSMUSG00000023236	OMA12981	Yes	No	No	No	NA	NA	NA	NA	NA	NA	Scg5 secretogranin V	neuroendocrine protein 7B2 precursor	NA	NA
ENSMUSG00000023243	OMA07790	No	No	No	No	NA	No	Rep:1.21	No	Rep:1.09	NA	Kcnk5 potassium channel, subfamily K, member 5	PREDICTED: potassium channel subfamily K member 5	potassium channel subfamily K member 16	CRE-TWK-20 protein [Caenorhabditis remanei]
ENSMUSG00000023249	OMA07830	No	No	No	No	NA	No	Rep:1.81	NA	NA	No	Parp3 poly (ADP-ribose) polymerase family, member 3	poly	protein mono-ADP-ribosyltransferase PARP3	NA
ENSMUSG00000023262	OMA09210	No	No	No	No	NA	No	No	NA	NA	Yes	Acy1 aminoacylase 1	PREDICTED: aminoacylase-1	aminoacylase-1	NA
ENSMUSG00000023272	OMA11958	No	No	No	No	Yes	No	Act:-0.83	NA	NA	NA	Creld2 cysteine-rich with EGF-like domains 2	PREDICTED: cysteine-rich with EGF-like domain protein 2	cysteine-rich with EGF-like domain protein 2 isoform X2	NA
ENSMUSG00000023284	OMA13039	Yes	No	No	No	NA	No	No	NA	NA	NA	Zfp605 zinc finger protein 605	PREDICTED: oocyte zinc finger protein XlCOF6-like	oocyte zinc finger protein XlCOF6 isoform X1	NA
ENSMUSG00000023333	OMA14719	No	No	No	No	NA	NA	NA	No	Rep:1.04	NA	Gcm1 glial cells missing homolog 1 (Drosophila)	chorion-specific transcription factor GCMa	NA	GE10457 [Drosophila yakuba]
ENSMUSG00000023348	OMA12661	No	No	No	No	Yes	No	No	NA	NA	NA	Trip6 thyroid hormone receptor interactor 6	lipoma-preferred partner	lipoma-preferred partner isoform X2	NA
ENSMUSG00000023387	OMA13311	No	No	No	No	No	No	Act:-3.43	No	No	NA	Kcnk16 potassium channel, subfamily K, member 16	PREDICTED: potassium channel subfamily K member 16	potassium channel subfamily K member 16 isoform X2	AGAP011924-PA [Anopheles gambiae str. PEST]
ENSMUSG00000023393	OMA09620	No	No	No	No	No	No	Act:-0.63	No	No	No	Slc17a9 solute carrier family 17, member 9	PREDICTED: solute carrier family 17 member 9	solute carrier family 17 member 9 isoform X3	solute carrier family 17 member 9 [Mus musculus]
ENSMUSG00000023403	OMA06199	No	No	No	No	NA	No	No	No	Rep:1.43	NA	Stk31 serine threonine kinase 31	PREDICTED: serine/threonine-protein kinase 31 isoform X1	serine/threonine-protein kinase 31	serine/threonine-protein kinase 31 [Rattus norvegicus]
ENSMUSG00000023411	OMA05987	No	No	Yes	No	NA	NA	NA	NA	NA	NA	Nfatc4 nuclear factor of activated T cells, cytoplasmic, calcineurin dependent 4	PREDICTED: nuclear factor of activated T-cells, cytoplasmic 4	NA	NA
ENSMUSG00000023452	OMA06922	No	No	No	No	No	No	Rep:0.44	NA	NA	Yes	Pisd phosphatidylserine decarboxylase	phosphatidylserine decarboxylase proenzyme, mitochondrial	phosphatidylserine decarboxylase proenzyme, mitochondrial isoform X1	NA
ENSMUSG00000023456	OMA10399	No	No	No	No	No	No	No	Yes	No	Yes	Tpi1 triosephosphate isomerase 1	triosephosphate isomerase	triosephosphate isomerase	triose-phosphate isomerase [Litopenaeus vannamei]
ENSMUSG00000023484	OMA07008	No	No	Yes	No	No	NA	NA	NA	NA	NA	Prph peripherin	peripherin	NA	NA
ENSMUSG00000023571	OMA14476	No	No	No	No	NA	Yes	No	Yes	No	NA	C1qtnf12 C1q and tumor necrosis factor related 12	adipolin precursor	adipolin	adipolin precursor [Danio rerio]
ENSMUSG00000023572	OMA18075	No	No	No	Act:-1.71	NA	No	No	No	No	NA	Ccndbp1 cyclin D-type binding-protein 1	PREDICTED: cyclin-D1-binding protein 1	cyclin-D1-binding protein 1 homolog isoform X1	Ccndbp1 protein [Xenopus laevis]
ENSMUSG00000023707	OMA13197	No	No	Yes	No	NA	No	No	No	No	No	Ogfod2 2-oxoglutarate and iron-dependent oxygenase domain containing 2	2-oxoglutarate and iron-dependent oxygenase domain-containing protein 2	2-oxoglutarate and iron-dependent oxygenase domain-containing protein 2	PREDICTED: 2-oxoglutarate and iron-dependent oxygenase domain-containing protein 2 isoform X1 [Danio rerio]
ENSMUSG00000023755	OMA19334	No	No	Yes	No	NA	NA	NA	NA	NA	NA	Rhebl1 Ras homolog enriched in brain like 1	GTPase RhebL1	NA	NA
ENSMUSG00000023764	OMA09064	Yes	No	No	No	No	NA	NA	No	No	NA	Sfi1 Sfi1 homolog, spindle assembly associated (yeast)	PREDICTED: protein SFI1 homolog isoform X1	NA	SFI1-like protein [Crassostrea gigas]
ENSMUSG00000023781	OMA24250	Yes	Act:-1.31	Yes	Act:-1.98	NA	NA	NA	NA	NA	NA	Hes7 hairy and enhancer of split 7 (Drosophila)	uncharacterized protein LOC100135364	NA	NA
ENSMUSG00000023800	OMA07677	Yes	No	NA	NA	NA	No	No	NA	NA	NA	Tiam2 T cell lymphoma invasion and metastasis 2	NA	protein still life, isoforms C/SIF type 2 isoform X1	NA
ENSMUSG00000023809	OMA01628	No	No	No	No	Yes	No	No	No	No	NA	Rps6ka2 ribosomal protein S6 kinase, polypeptide 2	PREDICTED: ribosomal protein S6 kinase alpha-2	ribosomal protein S6 kinase 2 beta isoform X1	ribosomal protein S6 kinase alpha-2 [Rattus norvegicus]
ENSMUSG00000023826	OMA12988	Yes	No	NA	NA	NA	No	No	No	No	NA	Park2 Parkinson disease (autosomal recessive, juvenile) 2, parkin	NA	E3 ubiquitin-protein ligase parkin	E3 ubiquitin-protein ligase parkin [Zootermopsis nevadensis]
ENSMUSG00000023827	OMA07482	No	No	No	No	NA	No	Rep:1.33	NA	NA	NA	Agpat4 1-acylglycerol-3-phosphate O-acyltransferase 4 (lysophosphatidic acid acyltransferase, delta)	1-acyl-sn-glycerol-3-phosphate acyltransferase delta	1-acyl-sn-glycerol-3-phosphate acyltransferase delta-like	NA
ENSMUSG00000023828	OMA16609	Yes	No	NA	NA	No	No	No	No	No	NA	Slc22a3 solute carrier family 22 (organic cation transporter), member 3	NA	organic cation transporter protein-like	Organic cation transporter protein [Crassostrea gigas]
ENSMUSG00000023832	OMA07280	No	No	No	No	NA	No	Act:-0.89	No	No	No	Acat2 acetyl-Coenzyme A acetyltransferase 2	acetyl-CoA acetyltransferase, cytosolic	acetyl-CoA acetyltransferase, cytosolic	Acetyl-CoA acetyltransferase [Crassostrea gigas]
ENSMUSG00000023868	OMA01527	No	No	Yes	No	NA	NA	NA	No	No	NA	Pde10a phosphodiesterase 10A	PREDICTED: cAMP and cAMP-inhibited cGMP 3',5'-cyclic phosphodiesterase 10A isoform X1	NA	putative 3',5'-cyclic phosphodiesterase pde-5 [Zootermopsis nevadensis]
ENSMUSG00000023883	OMA04397	No	No	No	No	No	No	No	Yes	No	NA	Phf10 PHD finger protein 10	PHD finger protein 10	transcription initiation factor TFIID subunit 3	PHD finger protein 10 [Fukomys damarensis]
ENSMUSG00000023885	OMA00857	No	No	No	No	NA	NA	NA	Yes	No	NA	Thbs2 thrombospondin 2	PREDICTED: thrombospondin-2	NA	thrombospondin-4-like protein [Cricetulus griseus]
ENSMUSG00000023886	OMA20899	Yes	No	NA	NA	NA	No	Rep:0.49	Yes	No	NA	Smoc2 SPARC related modular calcium binding 2	NA	SPARC-related modular calcium-binding protein 1 isoform X3	AGAP007489-PB [Anopheles gambiae str. PEST]
ENSMUSG00000023906	OMA14165	No	No	Yes	No	Yes	NA	NA	NA	NA	NA	Cldn6 claudin 6	claudin-6	NA	NA
ENSMUSG00000023908	OMA12168	No	No	No	No	Yes	No	No	No	No	No	Pkmyt1 protein kinase, membrane associated tyrosine/threonine 1	membrane-associated tyrosine- and threonine-specific cdc2-inhibitory kinase	LOW QUALITY PROTEIN: membrane-associated tyrosine- and threonine-specific cdc2-inhibitory kinase	Membrane-associated tyrosine- and threonine-specific cdc2-inhibitory kinase [Crassostrea gigas]
ENSMUSG00000023914	OMA05498	No	No	No	Rep:1.03	NA	NA	NA	NA	NA	NA	Mep1a meprin 1 alpha	meprin A subunit alpha precursor	NA	NA
ENSMUSG00000023944	OMA01295	No	No	No	No	Yes	No	No	No	No	No	Hsp90ab1 heat shock protein 90 alpha (cytosolic), class B member 1	heat shock protein HSP 90-beta	LOW QUALITY PROTEIN: heat shock protein HSP 90-beta-like, partial	Heat shock protein HSP 90-alpha [Harpegnathos saltator]
ENSMUSG00000023945	OMA03303	Yes	No	No	No	NA	No	Act:-0.71	No	No	NA	Slc5a7 solute carrier family 5 (choline transporter), member 7	PREDICTED: high affinity choline transporter 1	high-affinity choline transporter 1	High-affinity choline transporter 1 [Crassostrea gigas]
ENSMUSG00000023947	OMA15837	No	No	Yes	No	NA	NA	NA	No	Act:-1.16	NA	Nfkbie nuclear factor of kappa light polypeptide gene enhancer in B cells inhibitor, epsilon	NF-kappa-B inhibitor epsilon	NA	B-cell lymphoma 3 protein;
ENSMUSG00000023949	OMA10196	No	No	No	No	NA	No	No	Yes	No	No	Tcte1 t-complex-associated testis expressed 1	PREDICTED: T-complex-associated testis-expressed protein 1	dynein regulatory complex subunit 5 isoform X1	T-complex-associated testis-expressed protein 1 [Crassostrea gigas]
ENSMUSG00000023952	OMA03049	No	No	No	No	No	No	No	Yes	No	NA	Gtpbp2 GTP binding protein 2	GTP-binding protein 2	GTP-binding protein 2	GTP-binding protein 2;
ENSMUSG00000023953	OMA12058	No	No	No	No	No	No	No	No	No	Yes	Polh polymerase (DNA directed), eta (RAD 30 related)	PREDICTED: DNA polymerase eta	DNA polymerase eta	DNA polymerase eta [Danio rerio]
ENSMUSG00000023959	OMA09033	No	No	No	No	Yes	No	Act:-0.41	NA	NA	NA	Clic5 chloride intracellular channel 5	chloride intracellular channel protein 5	chloride intracellular channel protein 2-like	NA
ENSMUSG00000023965	OMA19444	Yes	No	NA	NA	NA	NA	NA	No	No	NA	Fbxl17 F-box and leucine-rich repeat protein 17	NA	NA	F-box and leucine-rich repeat protein 17 [Homo sapiens]
ENSMUSG00000023968	OMA14799	No	No	No	No	NA	NA	NA	Yes	No	Yes	Crip3 cysteine-rich protein 3	cysteine-rich protein 3	NA	cysteine-rich protein 1 [Callorhinchus milii]
ENSMUSG00000023977	OMA00268	No	No	No	No	NA	No	No	No	No	Yes	Ubr2 ubiquitin protein ligase E3 component n-recognin 2	PREDICTED: E3 ubiquitin-protein ligase UBR2 isoform X1	E3 ubiquitin-protein ligase UBR2 isoform X2	E3 ubiquitin-protein ligase UBR2 isoform 1 [Homo sapiens]
ENSMUSG00000023978	OMA08341	No	No	No	Act:-1.28	NA	No	No	NA	NA	NA	Prph2 peripherin 2	PREDICTED: peripherin-2	peripherin-2-like	NA
ENSMUSG00000023982	OMA14077	No	No	No	Rep:1.25	No	No	No	NA	NA	NA	Guca1a guanylate cyclase activator 1a (retina)	guanylyl cyclase-activating protein 1	neurocalcin homolog	NA
ENSMUSG00000023984	NA	No	No	NA	NA	NA	NA	NA	NA	NA	NA	Gm20517 predicted gene 20517	NA	NA	NA
ENSMUSG00000023987	OMA09857	No	No	No	No	NA	NA	NA	NA	NA	Yes	Pgc progastricsin (pepsinogen C)	pgc protein precursor	NA	NA
ENSMUSG00000023988	OMA06826	No	No	No	No	No	No	No	No	No	Yes	Bysl bystin-like	bystin	bystin	Bystin [Crassostrea gigas]
ENSMUSG00000023991	OMA04044	Yes	No	Yes	No	NA	No	No	NA	NA	NA	Foxp4 forkhead box P4	forkhead box protein P4	forkhead box protein P1 isoform X1	NA
ENSMUSG00000023999	OMA03579	Yes	No	No	No	No	No	Rep:0.66	No	No	NA	Kif6 kinesin family member 6	kinesin-like protein KIF6	kinesin-like protein KIF6	kinesin family member 6 [Mus musculus]
ENSMUSG00000024012	OMA19225	No	No	NA	NA	No	No	Act:-1.38	No	No	NA	Mtch1 mitochondrial carrier 1	NA	mitochondrial carrier homolog 2 isoform X1	Mitochondrial carrier homolog 2 [Rana catesbeiana]
ENSMUSG00000024014	OMA11145	No	No	Yes	No	NA	NA	NA	NA	NA	Yes	Pim1 proviral integration site 1	serine/threonine-protein kinase pim-1	NA	NA
ENSMUSG00000024026	OMA13485	Yes	No	No	No	No	No	No	No	No	NA	Glo1 glyoxalase 1	lactoylglutathione lyase	lactoylglutathione lyase	PREDICTED: lactoylglutathione lyase isoform X1 [Cricetulus griseus]
ENSMUSG00000024030	OMA02038	No	No	No	No	Yes	No	No	No	No	Yes	Abcg1 ATP-binding cassette, sub-family G (WHITE), member 1	PREDICTED: ATP-binding cassette sub-family G member 1	ATP-binding cassette sub-family G member 4	ATP-binding cassette sub-family G member 4 [Zootermopsis nevadensis]
ENSMUSG00000024034	OMA10966	No	No	No	No	Yes	No	Act:-1.40	No	No	NA	Tmprss3 transmembrane protease, serine 3	PREDICTED: transmembrane protease serine 3	enteropeptidase-like isoform X2	PREDICTED: transmembrane protease serine 6 isoform X1 [Mus musculus]
ENSMUSG00000024036	OMA10794	No	No	NA	NA	NA	No	Act:-1.76	NA	NA	NA	Slc37a1 solute carrier family 37 (glycerol-3-phosphate transporter), member 1	NA	glucose-6-phosphate exchanger SLC37A2 isoform X5	NA
ENSMUSG00000024039	OMA04301	No	No	No	No	No	No	Act:-0.95	No	No	No	Cbs cystathionine beta-synthase	cystathionine beta-synthase	cystathionine beta-synthase-like	cystathionine beta-synthase [Xenopus (Silurana) tropicalis]
ENSMUSG00000024041	OMA15310	No	No	No	Rep:4.35	No	No	No	No	No	NA	Cryaa crystallin, alpha A	PREDICTED: alpha-crystallin A chain-like	alpha-crystallin B chain isoform X1	small heat shock protein [uncultured cnidarian]
ENSMUSG00000024042	OMA10670	No	No	No	No	Yes	NA	NA	NA	NA	NA	Sik1 salt inducible kinase 1	PREDICTED: serine/threonine-protein kinase SIK1	NA	NA
ENSMUSG00000024043	OMA06545	Yes	No	No	No	NA	No	No	NA	NA	NA	Arhgap28 Rho GTPase activating protein 28	PREDICTED: rho GTPase-activating protein 28	rho GTPase-activating protein 18 isoform X1	NA
ENSMUSG00000024050	OMA08317	Yes	No	No	No	NA	NA	NA	NA	NA	NA	Wiz widely-interspaced zinc finger motifs	PREDICTED: protein Wiz isoform X1	NA	NA
ENSMUSG00000024052	OMA02189	No	No	No	No	Yes	No	No	NA	NA	Yes	Lpin2 lipin 2	phosphatidate phosphatase LPIN2	phosphatidate phosphatase LPIN3 isoform X1	NA
ENSMUSG00000024056	OMA06669	No	No	No	No	NA	No	Rep:0.49	No	No	No	Ndc80 NDC80 kinetochore complex component	kinetochore protein NDC80 homolog	kinetochore protein NDC80 homolog	kinetochore protein ndc80 [Schizosaccharomyces japonicus yFS275]
ENSMUSG00000024064	OMA05344	No	Rep:2.75	No	No	NA	NA	NA	NA	NA	NA	Galnt14 UDP-N-acetyl-alpha-D-galactosamine:polypeptide N-acetylgalactosaminyltransferase 14	polypeptide N-acetylgalactosaminyltransferase 14	NA	NA
ENSMUSG00000024065	OMA02486	No	No	Yes	Act:-1.01	Yes	No	No	No	No	No	Ehd3 EH-domain containing 3	EH domain-containing protein 3	EH domain-containing protein 1	EH domain-containing protein 1 [Acromyrmex echinatior]
ENSMUSG00000024067	OMA19179	No	No	No	No	No	No	Act:-0.97	No	No	No	Dpy30 dpy-30, histone methyltransferase complex regulatory subunit	protein dpy-30 homolog	protein dpy-30 homolog	GF15823 [Drosophila ananassae]
ENSMUSG00000024070	OMA04127	No	No	NA	NA	NA	No	Rep:0.63	NA	NA	NA	Prkd3 protein kinase D3	NA	serine/threonine-protein kinase D3 isoform X4	NA
ENSMUSG00000024073	OMA00007	No	No	No	No	NA	No	Rep:0.62	No	No	NA	Birc6 baculoviral IAP repeat-containing 6	PREDICTED: LOW QUALITY PROTEIN: baculoviral IAP repeat-containing protein 6	baculoviral IAP repeat-containing protein 6 isoform X6	TPA: baculoviral IAP repeat-containing 6 [Bos taurus]
ENSMUSG00000024074	OMA00835	Yes	No	Yes	No	Yes	No	Act:-0.96	NA	NA	NA	Crim1 cysteine rich transmembrane BMP regulator 1 (chordin like)	PREDICTED: cysteine-rich motor neuron 1 protein	cysteine-rich motor neuron 1 protein isoform X3	NA
ENSMUSG00000024076	OMA06037	No	No	No	No	NA	NA	NA	No	Act:-1.52	NA	Vit vitrin	PREDICTED: vitrin	NA	Collagen alpha-5(VI) chain [Crassostrea gigas]
ENSMUSG00000024077	OMA01907	No	No	No	Rep:1.45	No	NA	NA	NA	NA	No	Strn striatin, calmodulin binding protein	striatin	NA	NA
ENSMUSG00000024078	OMA03119	Yes	No	No	No	No	No	Rep:0.70	No	No	NA	Ttc27 tetratricopeptide repeat domain 27	PREDICTED: tetratricopeptide repeat protein 27	tetratricopeptide repeat protein 27	tetratricopeptide repeat protein 27 [Danio rerio]
ENSMUSG00000024079	OMA18939	No	No	No	Rep:1.21	No	NA	NA	NA	NA	NA	Eif2ak2 eukaryotic translation initiation factor 2-alpha kinase 2	PREDICTED: interferon-induced, double-stranded RNA-activated protein kinase	NA	NA
ENSMUSG00000024082	OMA09937	No	No	No	No	No	No	No	No	No	Yes	Ndufaf7 NADH dehydrogenase (ubiquinone) 1 alpha subcomplex assembly factor 7	protein arginine methyltransferase NDUFAF7, mitochondrial precursor	protein arginine methyltransferase NDUFAF7, mitochondrial isoform X1	PREDICTED: NADH dehydrogenase [ubiquinone] complex I, assembly factor 7 isoform X1 [Heterocephalus glaber]
ENSMUSG00000024085	OMA01448	Yes	No	No	No	NA	No	No	NA	NA	No	Man2a1 mannosidase 2, alpha 1	alpha-mannosidase 2	alpha-mannosidase 2x isoform X1	NA
ENSMUSG00000024087	OMA08688	No	No	No	No	Yes	No	Act:-0.76	Yes	No	NA	Cyp1b1 cytochrome P450, family 1, subfamily b, polypeptide 1	PREDICTED: cytochrome P450 1B1	steroid 17-alpha-hydroxylase/17,20 lyase	steroid 17-alpha-hydroxylase/17,20 lyase precursor [Danio rerio]
ENSMUSG00000024095	OMA03387	Yes	No	No	No	No	No	No	NA	NA	NA	Hnrnpll heterogeneous nuclear ribonucleoprotein L-like	heterogeneous nuclear ribonucleoprotein L-like	heterogeneous nuclear ribonucleoprotein L isoform X2	NA
ENSMUSG00000024097	OMA09716	No	No	No	No	NA	NA	NA	Yes	No	NA	Srsf7 serine/arginine-rich splicing factor 7	serine/arginine-rich splicing factor 7	NA	Serine/arginine-rich splicing factor 7;
ENSMUSG00000024098	OMA11734	No	No	Yes	No	No	No	No	NA	NA	NA	Twsg1 twisted gastrulation BMP signaling modulator 1	twisted gastrulation protein homolog 1 precursor	twisted gastrulation protein homolog 1-A	NA
ENSMUSG00000024109	OMA00260	Yes	No	No	No	No	No	No	NA	NA	NA	Nrxn1 neurexin I	PREDICTED: neurexin-1 isoform X1	neurexin-3 isoform X5	NA
ENSMUSG00000024112	OMA00306	No	No	Yes	No	NA	No	No	NA	NA	NA	Cacna1h calcium channel, voltage-dependent, T type, alpha 1H subunit	PREDICTED: voltage-dependent T-type calcium channel subunit alpha-1H	voltage-dependent T-type calcium channel subunit alpha-1I isoform X6	NA
ENSMUSG00000024121	OMA13262	No	No	Yes	No	NA	No	Rep:0.56	No	No	Yes	Atp6v0c ATPase, H+ transporting, lysosomal V0 subunit C	V-type proton ATPase 16 kDa proteolipid subunit	V-type proton ATPase 16 kDa proteolipid subunit	vacuolar ATP synthase 16 kDa proteolipid subunit-like protein [Callithrix jacchus]
ENSMUSG00000024130	OMA00769	No	No	Yes	No	NA	No	No	No	No	NA	Abca3 ATP-binding cassette, sub-family A (ABC1), member 3	PREDICTED: ATP-binding cassette sub-family A member 3 isoform X1	ATP-binding cassette sub-family A member 3	rCG33625, isoform CRA_a [Rattus norvegicus]
ENSMUSG00000024136	OMA15613	No	No	No	No	NA	No	No	Yes	No	NA	Dnase1l2 deoxyribonuclease 1-like 2	PREDICTED: deoxyribonuclease-1	uncharacterized protein LOC100891970 isoform X5	PREDICTED: deoxyribonuclease-1-like 2 [Columba livia]
ENSMUSG00000024142	OMA05860	No	No	No	No	Yes	No	No	No	No	No	Mlst8 MTOR associated protein, LST8 homolog (S. cerevisiae)	target of rapamycin complex subunit lst8	target of rapamycin complex subunit lst8-like	target of rapamycin complex subunit lst8 [Danio rerio]
ENSMUSG00000024145	OMA15428	No	No	No	No	No	Yes	No	No	No	NA	Pigf phosphatidylinositol glycan anchor biosynthesis, class F	phosphatidylinositol-glycan biosynthesis class F protein	phosphatidylinositol-glycan biosynthesis class F protein	Os03g0129000 [Oryza sativa Japonica Group]
ENSMUSG00000024146	OMA16836	No	No	No	No	No	No	No	NA	NA	Yes	Cript cysteine-rich PDZ-binding protein	cysteine-rich PDZ-binding protein	cysteine-rich PDZ-binding protein	NA
ENSMUSG00000024150	OMA19784	Yes	No	No	Act:-1.39	No	No	No	No	No	NA	Mcfd2 multiple coagulation factor deficiency 2	multiple coagulation factor deficiency protein 2 precursor	multiple coagulation factor deficiency protein 2 homolog isoform X1	NSCDNSF-like protein precursor [Saccoglossus kowalevskii]
ENSMUSG00000024160	OMA11391	No	No	No	No	NA	No	Act:-1.61	No	No	NA	Spsb3 splA/ryanodine receptor domain and SOCS box containing 3	SPRY domain-containing SOCS box protein 3	SPRY domain-containing SOCS box protein 3	PREDICTED: SPRY domain-containing SOCS box protein 3 isoform X2 [Callorhinchus milii]
ENSMUSG00000024165	OMA21205	No	No	Yes	No	NA	NA	NA	NA	NA	NA	Hn1l hematological and neurological expressed 1-like	hematological and neurological expressed 1-like protein	NA	NA
ENSMUSG00000024169	OMA00848	No	No	No	No	No	No	No	Yes	No	NA	Ift140 intraflagellar transport 140	intraflagellar transport protein 140 homolog	intraflagellar transport protein 140 homolog isoform X1	intraflagellar transport 140 [Mus musculus]
ENSMUSG00000024174	OMA11025	No	No	No	No	Yes	NA	NA	NA	NA	NA	Pot1b protection of telomeres 1B	protection of telomeres protein 1	NA	NA
ENSMUSG00000024175	OMA08670	No	No	No	No	No	No	Rep:0.66	NA	NA	NA	Tekt4 tektin 4	tektin-4	tektin A1	NA
ENSMUSG00000024181	OMA12619	No	No	No	Act:-1.02	NA	No	No	NA	NA	NA	Mrpl28 mitochondrial ribosomal protein L28	39S ribosomal protein L28, mitochondrial	39S ribosomal protein L28, mitochondrial	NA
ENSMUSG00000024188	OMA06233	Yes	No	No	No	No	No	No	NA	NA	NA	Luc7l Luc7-like	putative RNA-binding protein Luc7-like 1	putative RNA-binding protein Luc7-like 2	NA
ENSMUSG00000024190	OMA07408	No	No	No	No	Yes	NA	NA	NA	NA	NA	Dusp1 dual specificity phosphatase 1	dual specificity protein phosphatase 1	NA	NA
ENSMUSG00000024194	OMA19165	No	No	No	Rep:1.75	NA	No	No	No	No	NA	Cuta cutA divalent cation tolerance homolog	protein CutA	protein CutA homolog	CutA homolog precursor [Salmo salar]
ENSMUSG00000024197	OMA12706	No	No	No	No	NA	No	Rep:0.77	NA	NA	NA	Plin3 perilipin 3	PREDICTED: perilipin-3 isoform X1	perilipin-2 isoform X2	NA
ENSMUSG00000024206	OMA02840	Yes	No	No	No	NA	No	Rep:1.16	NA	NA	NA	Rfx2 regulatory factor X, 2 (influences HLA class II expression)	DNA-binding protein RFX2	transcription factor RFX3 isoform X9	NA
ENSMUSG00000024207	OMA06328	No	No	No	No	NA	NA	NA	No	No	Yes	Acsbg2 acyl-CoA synthetase bubblegum family member 2	long-chain-fatty-acid--CoA ligase ACSBG2	NA	long-chain-fatty-acid--CoA ligase ACSBG2 [Xenopus (Silurana) tropicalis]
ENSMUSG00000024211	OMA00858	Yes	No	No	No	No	No	No	No	No	NA	Grm8 glutamate receptor, metabotropic 8	PREDICTED: metabotropic glutamate receptor 8 isoform X1	metabotropic glutamate receptor 3 isoform X2	GG16401 [Drosophila erecta]
ENSMUSG00000024217	OMA12681	Yes	No	Yes	No	No	No	No	No	No	NA	Snrpc U1 small nuclear ribonucleoprotein C	U1 small nuclear ribonucleoprotein C	U1 small nuclear ribonucleoprotein C-like	U1 small nuclear ribonucleoprotein C {ECO:0000255|HAMAP-Rule:MF_03153};
ENSMUSG00000024219	OMA02595	Yes	No	No	No	NA	No	No	No	No	NA	Anks1 ankyrin repeat and SAM domain containing 1	ankyrin repeat and SAM domain-containing protein 1A	ankyrin repeat and sterile alpha motif domain-containing protein 1B	Ankyrin repeat and sterile alpha motif domain-containing protein 1B;
ENSMUSG00000024231	OMA01211	No	No	No	No	No	No	Rep:0.87	No	No	NA	Cul2 cullin 2	PREDICTED: cullin-2 isoform X1	cullin-2	cullin-2 [Bos taurus]
ENSMUSG00000024232	OMA09415	Yes	No	Yes	No	NA	NA	NA	NA	NA	NA	Bambi BMP and activin membrane-bound inhibitor	BMP and activin membrane-bound inhibitor homolog precursor	NA	NA
ENSMUSG00000024235	OMA06379	Yes	No	No	No	NA	NA	NA	NA	NA	NA	Map3k8 mitogen-activated protein kinase kinase kinase 8	PREDICTED: mitogen-activated protein kinase kinase kinase 8	NA	NA
ENSMUSG00000024236	OMA00592	No	No	No	No	Yes	No	No	No	No	NA	Svil supervillin	PREDICTED: supervillin isoform X1	supervillin isoform X1	Supervillin;
ENSMUSG00000024238	OMA01283	No	No	Yes	No	NA	NA	NA	NA	NA	NA	Zeb1 zinc finger E-box binding homeobox 1	zinc finger E-box-binding homeobox 1	NA	NA
ENSMUSG00000024240	OMA02768	Yes	No	No	No	NA	No	No	NA	NA	NA	Epc1 enhancer of polycomb homolog 1 (Drosophila)	enhancer of polycomb homolog 1	enhancer of polycomb homolog 1	NA
ENSMUSG00000024242	OMA00901	No	No	No	No	Yes	No	No	Yes	No	NA	Map4k3 mitogen-activated protein kinase kinase kinase kinase 3	mitogen-activated protein kinase kinase kinase kinase 3	mitogen-activated protein kinase kinase kinase kinase 5 isoform X6	PREDICTED: mitogen-activated protein kinase kinase kinase kinase 5 isoform X1 [Mus musculus]
ENSMUSG00000024247	OMA10122	Yes	No	Yes	No	NA	No	No	Yes	No	NA	Pkdcc protein kinase domain containing, cytoplasmic	extracellular tyrosine-protein kinase PKDCC	uncharacterized protein LOC580547	protein kinase domain-containing protein, cytoplasmic [Danio rerio]
ENSMUSG00000024251	OMA01238	No	No	Yes	No	No	No	No	No	No	NA	Thada thyroid adenoma associated	PREDICTED: thyroid adenoma-associated protein isoform X1	thyroid adenoma-associated protein homolog isoform X4	thyroid adenoma-associated protein homolog [Canis lupus familiaris]
ENSMUSG00000024254	OMA04900	No	No	No	Rep:1.05	NA	No	No	NA	NA	No	Abcg8 ATP-binding cassette, sub-family G (WHITE), member 8	PREDICTED: ATP-binding cassette sub-family G member 8	ABC transporter G family member 21	NA
ENSMUSG00000024256	OMA18904	Yes	No	No	No	NA	NA	NA	NA	NA	NA	Adcyap1 adenylate cyclase activating polypeptide 1	pituitary adenylate cyclase-activating polypeptide precursor	NA	NA
ENSMUSG00000024259	OMA07697	No	No	No	No	Yes	No	No	No	No	NA	Slc25a46 solute carrier family 25, member 46	solute carrier family 25 member 46	solute carrier family 25 member 46	solute carrier family 25 member 46-B [Xenopus laevis]
ENSMUSG00000024268	OMA03670	Yes	No	No	No	No	NA	NA	NA	NA	No	Celf4 CUGBP, Elav-like family member 4	CUGBP Elav-like family member 4	NA	NA
ENSMUSG00000024276	OMA14653	Yes	No	No	No	NA	NA	NA	NA	NA	NA	Zfp397 zinc finger protein 397	PREDICTED: zinc finger protein 572-like	NA	NA
ENSMUSG00000024277	OMA06437	Yes	No	No	No	No	NA	NA	No	No	NA	Mapre2 microtubule-associated protein, RP/EB family, member 2	microtubule-associated protein RP/EB family member 2	NA	PREDICTED: microtubule-associated protein RP/EB family member 1 isoform X1 [Acanthisitta chloris]
ENSMUSG00000024283	OMA02829	Yes	No	No	No	No	NA	NA	NA	NA	NA	Wac WW domain containing adaptor with coiled-coil	WW domain-containing adapter protein with coiled-coil	NA	NA
ENSMUSG00000024287	OMA02804	No	No	No	No	No	Yes	No	Yes	No	No	Thoc1 THO complex 1	PREDICTED: THO complex subunit 1	THO complex subunit 1	GI10383 [Drosophila mojavensis]
ENSMUSG00000024290	OMA00477	No	No	Yes	No	No	No	No	NA	NA	NA	Rock1 Rho-associated coiled-coil containing protein kinase 1	PREDICTED: rho-associated protein kinase 1	Rho kinase	NA
ENSMUSG00000024294	OMA00506	No	No	No	No	Yes	NA	NA	No	No	NA	Mib1 mindbomb E3 ubiquitin protein ligase 1	E3 ubiquitin-protein ligase MIB1	NA	E3 ubiquitin-protein ligase MIB1 [Bos taurus]
ENSMUSG00000024299	OMA01344	No	No	Yes	No	Yes	No	No	NA	NA	NA	Adamts10 a disintegrin-like and metallopeptidase (reprolysin type) with thrombospondin type 1 motif, 10	PREDICTED: A disintegrin and metalloproteinase with thrombospondin motifs 10 isoform X1	A disintegrin and metalloproteinase with thrombospondin motifs 7	NA
ENSMUSG00000024300	OMA00888	No	No	No	No	No	No	No	No	No	Yes	Myo1f myosin IF	PREDICTED: unconventional myosin-If	amoeboid myosin I isoform X1	TPA: Heavy chain, Unconventional Myosin family member (hum-1)-like [Bos taurus]
ENSMUSG00000024302	OMA01857	No	No	No	No	NA	No	No	No	No	Yes	Dtna dystrobrevin alpha	dystrobrevin alpha	dystrobrevin beta isoform X1	dystrobrevin B (mDTN-B) [Mus musculus]
ENSMUSG00000024304	OMA01568	Yes	No	Yes	No	NA	NA	NA	No	No	NA	Cdh2 cadherin 2	cadherin-2 precursor	NA	cadherin EGF LAG seven-pass G-type receptor 3 isoform X6 [Cavia porcellus]
ENSMUSG00000024306	NA	Yes	No	NA	NA	NA	NA	NA	NA	NA	NA	Ccdc178 coiled coil domain containing 178	NA	NA	NA
ENSMUSG00000024313	OMA04795	No	No	No	Rep:2.56	NA	NA	NA	No	No	NA	Mep1b meprin 1 beta	meprin A subunit beta precursor	NA	metalloproteinase 2 [Hydra vulgaris]
ENSMUSG00000024327	OMA10396	No	No	No	No	Yes	No	No	No	No	No	Slc39a7 solute carrier family 39 (zinc transporter), member 7	PREDICTED: zinc transporter SLC39A7	protein catecholamines up	solute carrier 39 (zinc transporter) member 7 [Salmo salar]
ENSMUSG00000024330	OMA00491	No	No	No	Act:-2.59	NA	NA	NA	NA	NA	NA	Col11a2 collagen, type XI, alpha 2	PREDICTED: collagen alpha-2(XI) chain	NA	NA
ENSMUSG00000024335	OMA02873	No	No	No	Rep:1.81	NA	No	Rep:0.49	NA	NA	NA	Brd2 bromodomain containing 2	bromodomain-containing protein 2	bromodomain-containing protein 3 isoform X3	NA
ENSMUSG00000024339	OMA10628	No	No	No	Rep:1.45	NA	NA	NA	NA	NA	NA	Tap2 transporter 2, ATP-binding cassette, sub-family B (MDR/TAP)	PREDICTED: LOW QUALITY PROTEIN: antigen peptide transporter 2	NA	NA
ENSMUSG00000024347	OMA14187	Yes	No	NA	NA	NA	No	No	NA	NA	NA	Psd2 pleckstrin and Sec7 domain containing 2	NA	PH and SEC7 domain-containing protein 1 isoform X2	NA
ENSMUSG00000024350	OMA18064	Yes	No	No	No	NA	NA	NA	NA	NA	NA	Dnajc18 DnaJ heat shock protein family (Hsp40) member C18	DnaJ heat shock protein family (Hsp40) member C18	NA	NA
ENSMUSG00000024353	OMA23106	No	No	NA	NA	No	No	Act:-1.62	No	No	NA	Mzb1 marginal zone B and B1 cell-specific protein 1	NA	marginal zone B- and B1-cell-specific protein-like	Plasma cell-induced resident endoplasmic reticulum protein [Chelonia mydas]
ENSMUSG00000024359	OMA01892	No	No	No	No	No	No	No	No	No	Yes	Hspa9 heat shock protein 9	stress-70 protein, mitochondrial	stress-70 protein, mitochondrial	heat shock 70kDa protein 9 (mortalin) [Xenopus laevis]
ENSMUSG00000024360	OMA03031	No	No	No	No	No	No	Rep:0.69	No	Rep:2.13	No	Etf1 eukaryotic translation termination factor 1	eukaryotic peptide chain release factor subunit 1	eukaryotic peptide chain release factor subunit 1	eukaryotic release factor 1, isoform H [Drosophila melanogaster]
ENSMUSG00000024365	OMA15282	Yes	No	No	No	NA	NA	NA	No	No	NA	Cyp21a1 cytochrome P450, family 21, subfamily a, polypeptide 1	PREDICTED: steroid 21-hydroxylase isoform X1	NA	cytochrome P450 17alpha-hydroxylase [Paramisgurnus dabryanus]
ENSMUSG00000024370	OMA02442	No	No	No	No	Yes	No	No	No	Act:-1.20	No	Cdc23 CDC23 cell division cycle 23	cell division cycle protein 23 homolog	cell division cycle protein 23 homolog	cell division cycle 23 [Xenopus (Silurana) tropicalis]
ENSMUSG00000024376	OMA02590	Yes	No	No	No	NA	No	No	NA	NA	No	Epb41l4a erythrocyte membrane protein band 4.1 like 4a	band 4.1-like protein 4A	band 4.1-like protein 4A isoform X2	NA
ENSMUSG00000024382	OMA01240	No	No	Yes	No	No	No	No	No	No	Yes	Ercc3 excision repair cross-complementing rodent repair deficiency, complementation group 3	TFIIH basal transcription factor complex helicase XPB subunit	general transcription and DNA repair factor IIH helicase subunit XPB	excision repair cross-complementing rodent repair deficiency, complementation group 3, isoform CRA_a [Mus musculus]
ENSMUSG00000024384	OMA04370	No	No	No	No	No	No	Rep:0.81	No	No	NA	Iws1 IWS1, SUPT6 interacting protein	protein IWS1 homolog	protein IWS1 homolog	Protein IWS1 homolog;
ENSMUSG00000024386	OMA12255	No	No	No	Act:-1.39	NA	No	No	No	No	NA	Proc protein C	vitamin K-dependent protein C precursor	trypsin-1	solute carrier family 12 member 4 [Cricetulus griseus]
ENSMUSG00000024388	OMA00738	No	No	No	Act:-1.06	NA	NA	NA	No	No	NA	Myo7b myosin VIIB	PREDICTED: unconventional myosin-VIIb	NA	myosin-XV-like protein [Camelus ferus]
ENSMUSG00000024399	OMA26152	No	No	No	Act:-1.86	NA	NA	NA	NA	NA	NA	Ltb lymphotoxin B	lymphotoxin-beta	NA	NA
ENSMUSG00000024404	OMA04642	Yes	No	No	Rep:1.95	NA	No	Rep:1.47	Yes	No	No	Riok3 RIO kinase 3	serine/threonine-protein kinase RIO3	serine/threonine-protein kinase RIO3	serine/threonine-protein kinase RIO3 [Xenopus (Silurana) tropicalis]
ENSMUSG00000024410	OMA02477	No	No	No	No	No	No	No	No	No	Yes	3110002H16Rik RIKEN cDNA 3110002H16 gene	uncharacterized protein C18orf8 homolog	regulator of MON1-CCZ1 complex isoform X1	uncharacterized protein C18orf8 isoform 1 [Homo sapiens]
ENSMUSG00000024411	OMA09783	Yes	No	No	No	No	No	No	No	No	NA	Aqp4 aquaporin 4	aquaporin-4 isoform 1	aquaporin AQPAe.a-like	Aquaporin AQPAe.a, putative [Pediculus humanus corporis]
ENSMUSG00000024420	OMA00326	Yes	No	Yes	No	NA	No	Act:-1.32	NA	NA	NA	Zfp521 zinc finger protein 521	PREDICTED: zinc finger protein 521 isoform X1	zinc finger protein 423 isoform X1	NA
ENSMUSG00000024421	OMA00276	No	No	No	No	No	No	Act:-0.67	NA	NA	NA	Lama3 laminin, alpha 3	PREDICTED: laminin subunit alpha-3	laminin subunit alpha isoform X1	NA
ENSMUSG00000024425	OMA10714	Yes	No	No	No	No	NA	NA	Yes	No	NA	Ndfip1 Nedd4 family interacting protein 1	NEDD4 family-interacting protein 1	NA	NDFIP2 protein [Bos taurus]
ENSMUSG00000024427	OMA09602	No	No	Yes	No	Yes	Yes	No	NA	NA	NA	Spry4 sprouty homolog 4 (Drosophila)	PREDICTED: protein sprouty homolog 4	protein sprouty homolog 3	NA
ENSMUSG00000024431	OMA03859	Yes	No	No	No	NA	No	No	NA	NA	NA	Nr3c1 nuclear receptor subfamily 3, group C, member 1	glucocorticoid receptor	retinoic acid receptor RXR-gamma	NA
ENSMUSG00000024448	NA	No	Act:-7.81	NA	NA	NA	NA	NA	NA	NA	NA	H2-M10.1 histocompatibility 2, M region locus 10.1	NA	NA	NA
ENSMUSG00000024456	OMA01034	No	No	No	No	No	No	No	No	No	Yes	Diaph1 diaphanous related formin 1	PREDICTED: protein diaphanous homolog 1 isoform X1	protein diaphanous homolog 2 isoform X3	Protein diaphanous like protein 1 [Fukomys damarensis]
ENSMUSG00000024474	OMA08207	No	No	NA	NA	No	No	Rep:0.46	No	No	No	Ik IK cytokine	NA	protein Red	protein Red [Bos taurus]
ENSMUSG00000024477	OMA06601	No	No	No	No	No	No	Act:-1.03	No	No	No	Pggt1b protein geranylgeranyltransferase type I, beta subunit	geranylgeranyl transferase type-1 subunit beta	geranylgeranyl transferase type-1 subunit beta	PREDICTED: geranylgeranyl transferase type-1 subunit beta [Pteropus alecto]
ENSMUSG00000024480	OMA09609	No	No	No	No	Yes	No	Rep:0.80	No	No	No	Ap3s1 adaptor-related protein complex 3, sigma 1 subunit	AP-3 complex subunit sigma-1	AP-3 complex subunit sigma-1	PREDICTED: AP-3 complex subunit sigma-2-like isoformX1 [Apis mellifera]
ENSMUSG00000024481	OMA07745	Yes	No	No	No	NA	NA	NA	NA	NA	NA	Lvrn laeverin	PREDICTED: aminopeptidase Q	NA	NA
ENSMUSG00000024483	OMA00199	No	No	No	No	Yes	NA	NA	No	No	NA	Ankhd1 ankyrin repeat and KH domain containing 1	ankyrin repeat and KH domain-containing protein 1	NA	ankyrin repeat and KH domain-containing protein 1 [Perca flavescens]
ENSMUSG00000024486	OMA20057	No	No	No	Act:-1.04	NA	NA	NA	NA	NA	NA	Hbegf heparin-binding EGF-like growth factor	PREDICTED: proheparin-binding EGF-like growth factor	NA	NA
ENSMUSG00000024491	OMA02342	No	No	No	No	NA	NA	NA	No	No	Yes	Rbm27 RNA binding motif protein 27	PREDICTED: RNA-binding protein 27	NA	RNA-binding protein 27 [Chelonia mydas]
ENSMUSG00000024493	OMA00611	No	No	No	No	No	No	No	No	No	Yes	Lars leucyl-tRNA synthetase	leucine--tRNA ligase, cytoplasmic	leucine--tRNA ligase, cytoplasmic isoform X1	leucyl tRNA synthetase [Homo sapiens]
ENSMUSG00000024497	OMA06333	No	No	No	Rep:1.10	NA	NA	NA	NA	NA	NA	Pou4f3 POU domain, class 4, transcription factor 3	PREDICTED: POU domain, class 4, transcription factor 3	NA	NA
ENSMUSG00000024498	OMA00985	Yes	No	No	No	NA	NA	NA	No	No	NA	Tcerg1 transcription elongation regulator 1 (CA150)	PREDICTED: transcription elongation regulator 1 isoform X1	NA	transcription elongation regulator 1 [Danio rerio]
ENSMUSG00000024500	OMA03097	Yes	No	No	No	No	No	Rep:0.93	No	No	No	Ppp2r2b protein phosphatase 2, regulatory subunit B, beta	serine/threonine-protein phosphatase 2A 55 kDa regulatory subunit B beta isoform	serine/threonine-protein phosphatase 2A 55 kDa regulatory subunit B alpha isoform	PREDICTED: protein phosphatase PP2A 55 kDa regulatory subunit isoform X2 [Microplitis demolitor]
ENSMUSG00000024501	OMA02214	No	No	No	No	Yes	NA	NA	NA	NA	NA	Dpysl3 dihydropyrimidinase-like 3	dihydropyrimidinase-related protein 3	NA	NA
ENSMUSG00000024505	OMA18269	Yes	No	No	No	No	No	No	No	No	NA	Dtwd2 DTW domain containing 2	DTW domain-containing protein 2	DTW domain-containing protein 2	DTW domain-containing protein 2 [Gallus gallus]
ENSMUSG00000024507	OMA03140	No	No	No	No	NA	No	No	Yes	No	Yes	Hsd17b4 hydroxysteroid (17-beta) dehydrogenase 4	peroxisomal multifunctional enzyme type 2	peroxisomal multifunctional enzyme type 2-like	hydroxysteroid (17-beta) dehydrogenase 4 [Xenopus (Silurana) tropicalis]
ENSMUSG00000024510	OMA18267	No	No	NA	NA	Yes	NA	NA	No	No	NA	Ftmt ferritin mitochondrial	NA	NA	ferritin protein [Phascolosoma esculenta]
ENSMUSG00000024511	OMA10239	Yes	No	No	No	No	NA	NA	No	No	NA	Rab27b RAB27B, member RAS oncogene family	ras-related protein Rab-27B	NA	Ras-related protein Rab-27A;
ENSMUSG00000024512	NA	No	No	NA	NA	NA	NA	NA	NA	NA	NA	Dynap dynactin associated protein	NA	NA	NA
ENSMUSG00000024513	OMA08543	Yes	No	No	No	NA	No	Act:-0.56	NA	NA	NA	Mbd2 methyl-CpG binding domain protein 2	methyl-CpG-binding domain protein 2	methyl-CpG-binding domain protein 2 isoform X2	NA
ENSMUSG00000024521	NA	No	Rep:1.07	NA	NA	NA	NA	NA	NA	NA	NA	Pmaip1 phorbol-12-myristate-13-acetate-induced protein 1	NA	NA	NA
ENSMUSG00000024524	OMA05358	Yes	No	No	No	Yes	No	No	No	No	No	Gnal guanine nucleotide binding protein, alpha stimulating, olfactory type	guanine nucleotide-binding protein G(olf) subunit alpha	guanine nucleotide-binding protein G(s) alpha subunit	guanine nucleotide binding protein, alpha stimulating activity polypeptide [Daphnia pulex]
ENSMUSG00000024526	OMA18948	No	No	Yes	No	NA	NA	NA	NA	NA	NA	Cidea cell death-inducing DNA fragmentation factor, alpha subunit-like effector A	cell death activator CIDE-A	NA	NA
ENSMUSG00000024529	OMA07894	No	No	No	Act:-3.91	NA	No	No	NA	NA	NA	Lox lysyl oxidase	protein-lysine 6-oxidase precursor	lysyl oxidase-like 2 isoform X1	NA
ENSMUSG00000024530	OMA13835	No	No	No	No	No	No	Rep:0.64	Yes	No	No	Prelid3a PRELI domain containing 3A	PRELI domain containing protein 3A	PRELI domain containing protein 3B-like	protein slowmo homolog 2 [Sus scrofa]
ENSMUSG00000024533	OMA04913	No	No	No	No	Yes	No	No	NA	NA	NA	Spire1 spire homolog 1 (Drosophila)	PREDICTED: protein spire homolog 1	LOW QUALITY PROTEIN: protein spire homolog 2	NA
ENSMUSG00000024535	OMA13492	Yes	No	No	No	NA	No	No	NA	NA	NA	Snx24 sorting nexing 24	sorting nexin-24	sorting nexin-24 isoform X2	NA
ENSMUSG00000024537	OMA14803	No	No	No	No	NA	No	Act:-0.80	NA	NA	No	Psmg2 proteasome (prosome, macropain) assembly chaperone 2	proteasome assembly chaperone 2	proteasome assembly chaperone 2	NA
ENSMUSG00000024539	OMA09391	No	No	No	No	No	No	Rep:0.47	NA	NA	NA	Ptpn2 protein tyrosine phosphatase, non-receptor type 2	PREDICTED: tyrosine-protein phosphatase non-receptor type 2 isoform X1	tyrosine-protein phosphatase non-receptor type 1 isoform X3	NA
ENSMUSG00000024544	OMA07873	Yes	No	No	No	NA	NA	NA	NA	NA	NA	Ldlrad4 low density lipoprotein receptor class A domain containing 4	PREDICTED: low-density lipoprotein receptor class A domain-containing protein 4 isoform X1	NA	NA
ENSMUSG00000024546	NA	Yes	No	NA	NA	NA	NA	NA	NA	NA	NA	4930546C10Rik RIKEN cDNA 4930546C10 gene	NA	NA	NA
ENSMUSG00000024553	OMA07289	No	No	No	No	Yes	No	No	No	No	NA	Galr1 galanin receptor 1	galanin receptor type 1	galanin receptor type 1-like	neuropeptide FF receptor 1 [Homo sapiens]
ENSMUSG00000024558	OMA03870	No	No	No	No	Yes	NA	NA	NA	NA	NA	Mapk4 mitogen-activated protein kinase 4	PREDICTED: mitogen-activated protein kinase 4	NA	NA
ENSMUSG00000024560	OMA03736	No	No	No	Rep:3.02	No	NA	NA	No	No	No	Cxxc1 CXXC finger 1 (PHD domain)	PREDICTED: CXXC-type zinc finger protein 1 isoform X1	NA	CpG-binding protein [Crassostrea gigas]
ENSMUSG00000024563	OMA02563	Yes	No	No	No	Yes	No	No	No	No	NA	Smad2 SMAD family member 2	mothers against decapentaplegic homolog 2	uncharacterized protein LOC577345 isoform X1	mothers against decapentaplegic homolog 3-like [Exaiptasia pallida]
ENSMUSG00000024565	OMA00908	Yes	No	Yes	No	Yes	NA	NA	NA	NA	NA	Sall3 sal-like 3 (Drosophila)	PREDICTED: sal-like protein 3 isoform X1	NA	NA
ENSMUSG00000024566	OMA00524	No	No	No	No	NA	No	No	No	No	Yes	Atp9b ATPase, class II, type 9B	PREDICTED: probable phospholipid-transporting ATPase IIB	probable phospholipid-transporting ATPase IIB isoform X2	putative phospholipid-transporting ATPase IIB [Zootermopsis nevadensis]
ENSMUSG00000024575	OMA01697	Yes	No	No	No	Yes	NA	NA	NA	NA	NA	Pde6a phosphodiesterase 6A, cGMP-specific, rod, alpha	PREDICTED: rod cGMP-specific 3',5'-cyclic phosphodiesterase subunit alpha	NA	NA
ENSMUSG00000024580	OMA19821	No	No	Yes	No	NA	NA	NA	NA	NA	NA	Grpel2 GrpE-like 2, mitochondrial	grpE protein homolog 2, mitochondrial	NA	NA
ENSMUSG00000024588	OMA06242	Yes	No	No	No	No	No	No	Yes	No	No	Fech ferrochelatase	PREDICTED: ferrochelatase, mitochondrial	ferrochelatase, mitochondrial	RecName: Full=Ferrochelatase, mitochondrial; AltName: Full=Heme synthase; AltName: Full=Protoheme ferro-lyase; Flags: Precursor
ENSMUSG00000024589	OMA00989	Yes	No	No	No	No	No	No	No	No	No	Nedd4l neural precursor cell expressed, developmentally down-regulated gene 4-like	E3 ubiquitin-protein ligase NEDD4-like	E3 ubiquitin-protein ligase NEDD4 isoform X2	neural precursor cell expressed, developmentally down-regulated 4-like [Saccoglossus kowalevskii]
ENSMUSG00000024592	OMA20993	No	No	No	Rep:1.29	No	No	No	No	No	No	C330018D20Rik RIKEN cDNA C330018D20 gene	PREDICTED: glutaredoxin-like protein C5orf63 homolog	glutaredoxin-like protein C5orf63 homolog	AAL086Wp [Ashbya gossypii ATCC 10895]
ENSMUSG00000024593	OMA00613	No	No	No	No	Yes	No	No	No	No	NA	Megf10 multiple EGF-like-domains 10	multiple epidermal growth factor-like domains protein 10 precursor	multiple epidermal growth factor-like domains protein 11	multiple EGF-like-domains 11 [Mus musculus]
ENSMUSG00000024594	OMA07628	No	No	Yes	No	Yes	No	No	No	No	NA	Prrc1 proline-rich coiled-coil 1	protein PRRC1	protein PRRC1	FLJ00410 protein [Homo sapiens]
ENSMUSG00000024597++	OMA00707	Yes	No	Yes	No	No	No	No	No	No	No	Slc12a2 solute carrier family 12, member 2	PREDICTED: solute carrier family 12 member 2 isoform X1	solute carrier family 12 (sodium/potassium/chloride transporters), member 2 isoform X1	solute carrier family 12 (sodium/potassium/chloride transporter), member 2 [Xenopus laevis]
ENSMUSG00000024598	OMA00057	No	No	No	No	NA	No	Rep:0.71	No	No	NA	Fbn2 fibrillin 2	PREDICTED: fibrillin-2	fibrillin-2 isoform X1	Fibrillin-2;
ENSMUSG00000024600	OMA05152	No	No	No	No	No	No	Rep:0.65	NA	NA	No	Slc27a6 solute carrier family 27 (fatty acid transporter), member 6	long-chain fatty acid transport protein 6	very long-chain acyl-CoA synthetase	NA
ENSMUSG00000024601	OMA07345	No	No	No	Rep:2.08	NA	No	No	No	No	Yes	Isoc1 isochorismatase domain containing 1	isochorismatase domain-containing protein 1	isochorismatase domain-containing protein 1-like	Isochorismatase domain-containing protein 2, mitochondrial [Crassostrea gigas]
ENSMUSG00000024608	OMA11834	No	No	No	No	No	No	Act:-1.57	No	No	Yes	Rps14 ribosomal protein S14	40S ribosomal protein S14	ribosomal protein S14 isoform X1	uncharacterized protein LOC100499665 [Glycine max]
ENSMUSG00000024614	OMA06385	No	No	No	No	NA	NA	NA	Yes	No	NA	Tmx3 thioredoxin-related transmembrane protein 3	PREDICTED: protein disulfide-isomerase TMX3	NA	Protein disulfide-isomerase TMX3;
ENSMUSG00000024617	OMA02671	No	No	No	No	NA	No	Act:-0.77	NA	NA	NA	Camk2a calcium/calmodulin-dependent protein kinase II alpha	calcium/calmodulin-dependent protein kinase type II subunit alpha	calcium/calmodulin-dependent protein kinase type II subunit alpha isoform X1	NA
ENSMUSG00000024619	OMA20817	Yes	No	Yes	No	NA	NA	NA	NA	NA	NA	Cdx1 caudal type homeobox 1	homeobox protein CDX-4	NA	NA
ENSMUSG00000024622	OMA02444	No	No	No	No	NA	NA	NA	No	No	NA	Hmgxb3 HMG box domain containing 3	HMG domain-containing protein 3	NA	HMG domain-containing protein 3-like [Exaiptasia pallida]
ENSMUSG00000024640	OMA06970	Yes	No	No	No	NA	No	No	No	No	Yes	Psat1 phosphoserine aminotransferase 1	phosphoserine aminotransferase	phosphoserine aminotransferase	phosphoserine aminotransferase 1 isoform 1 [Haliotis discus discus]
ENSMUSG00000024642	OMA00877	Yes	No	No	No	Yes	No	No	No	No	NA	Tle4 transducin-like enhancer of split 4	transducin-like enhancer protein 4	transducin-like enhancer protein 4 isoform X4	Transducin-like enhancer protein 4 [Cricetulus griseus]
ENSMUSG00000024644	OMA04479	No	No	No	No	NA	No	Act:-0.73	No	Rep:1.13	Yes	Cndp2 CNDP dipeptidase 2 (metallopeptidase M20 family)	cytosolic non-specific dipeptidase	cytosolic non-specific dipeptidase	cytosolic nonspecific dipeptidase [Oreochromis niloticus]
ENSMUSG00000024646	OMA17302	Yes	No	No	No	No	No	No	No	No	No	Cyb5a cytochrome b5 type A (microsomal)	cytochrome b5 type A (microsomal)	cytochrome b5	cytochrome b5 type A (microsomal) [Xenopus (Silurana) tropicalis]
ENSMUSG00000024650	OMA09765	No	No	No	No	No	No	Act:-2.49	No	No	NA	Slc22a6 solute carrier family 22 (organic anion transporter), member 6	PREDICTED: solute carrier family 22 member 6-B isoform X1	organic cation transporter protein isoform X2	sugar transporter [Aedes aegypti]
ENSMUSG00000024658	NA	Yes	No	NA	NA	NA	NA	NA	NA	NA	NA	Gm9750 predicted gene 9750	NA	NA	NA
ENSMUSG00000024661	OMA13195	No	No	No	No	Yes	No	No	No	No	NA	Fth1 ferritin heavy polypeptide 1	ferritin heavy chain	soma ferritin	ferritin [Galaxea astreata]
ENSMUSG00000024665	OMA06573	No	No	No	No	NA	No	No	Yes	No	NA	Fads2 fatty acid desaturase 2	fatty acid desaturase 2	acyl-CoA 6-desaturase	Delta-6-desaturase [Medicago truncatula]
ENSMUSG00000024691	NA	Yes	No	NA	NA	NA	NA	NA	NA	NA	NA	Fam111a family with sequence similarity 111, member A	NA	NA	NA
ENSMUSG00000024712	OMA16764	No	No	No	No	NA	No	Act:-0.95	No	No	No	Rfk riboflavin kinase	riboflavin kinase	riboflavin kinase	riboflavin kinase [Xenopus laevis]
ENSMUSG00000024713	OMA01829	No	No	No	No	NA	NA	NA	No	No	Yes	Pcsk5 proprotein convertase subtilisin/kexin type 5	PREDICTED: proprotein convertase subtilisin/kexin type 5	NA	Neuroendocrine convertase 1;
ENSMUSG00000024732	OMA21137	No	No	No	No	NA	No	No	No	No	Yes	Ccdc86 coiled-coil domain containing 86	PREDICTED: coiled-coil domain-containing protein 86 isoform X1	uncharacterized protein LOC100889012 isoform X1	Coiled-coil domain-containing protein 86 [Harpegnathos saltator]
ENSMUSG00000024749	OMA03603	Yes	No	No	No	NA	NA	NA	NA	NA	NA	Tmc1 transmembrane channel-like gene family 1	PREDICTED: transmembrane channel-like protein 1	NA	NA
ENSMUSG00000024766	OMA25626	Yes	No	NA	NA	NA	NA	NA	No	Act:-1.86	NA	Lipo3 lipase, member O3	NA	NA	Gastric triacylglycerol lipase [Myotis davidii]
ENSMUSG00000024768	OMA15104	No	No	NA	NA	No	No	No	Yes	Rep:1.22	NA	Lipf lipase, gastric	NA	gastric triacylglycerol lipase-like	lysosomal acid lipase/cholesteryl ester hydrolase precursor [Ovis aries]
ENSMUSG00000024771	OMA18126	No	No	NA	NA	NA	NA	NA	No	No	Yes	Lipk lipase, family member K	NA	NA	lysosomal acid lipase [Sparus aurata]
ENSMUSG00000024772	OMA02667	No	No	No	No	Yes	NA	NA	NA	NA	NA	Ehd1 EH-domain containing 1	EH domain-containing protein 1	NA	NA
ENSMUSG00000024781	OMA09611	No	No	No	No	No	No	No	No	No	Yes	Lipa lysosomal acid lipase A	lysosomal acid lipase/cholesteryl ester hydrolase precursor	gastric triacylglycerol lipase	Chain A, Crystal Structure Of Human Gastric Lipase
ENSMUSG00000024784	OMA20732	No	No	No	Rep:1.51	NA	No	No	NA	NA	NA	Gpha2 glycoprotein hormone alpha 2	PREDICTED: glycoprotein hormone alpha-2	glycoprotein hormone alpha-2 isoform X1	NA
ENSMUSG00000024787	OMA17563	No	No	No	Act:-1.18	NA	NA	NA	NA	NA	NA	Snx15 sorting nexin 15	sorting nexin-15	NA	NA
ENSMUSG00000024797	OMA03050	No	No	No	No	No	Yes	No	No	No	No	Vps51 VPS51 GARP complex subunit	vacuolar protein sorting-associated protein 51 homolog	vacuolar protein sorting-associated protein 51 homolog	Protein fat-free [Crassostrea gigas]
ENSMUSG00000024800	OMA12337	No	No	No	No	No	No	No	Yes	No	No	Rpp30 ribonuclease P/MRP 30 subunit	ribonuclease P protein subunit p30	ribonuclease P protein subunit p30-like	PREDICTED: ribonuclease P protein subunit p30 isoform X2 [Cricetulus griseus]
ENSMUSG00000024803	OMA11353	No	Act:-8.20	No	No	No	NA	NA	NA	NA	NA	Ankrd1 ankyrin repeat domain 1 (cardiac muscle)	ankyrin repeat domain-containing protein 1	NA	NA
ENSMUSG00000024805	OMA09576	No	No	No	No	NA	NA	NA	Yes	No	NA	Pcgf5 polycomb group ring finger 5	PREDICTED: polycomb group RING finger protein 5 isoform X1	NA	polycomb group RING finger protein 5-A [Danio rerio]
ENSMUSG00000024810	NA	Yes	No	NA	NA	NA	NA	NA	NA	NA	NA	Il33 interleukin 33	NA	NA	NA
ENSMUSG00000024812	OMA01544	No	No	No	No	Yes	No	No	NA	NA	NA	Tjp2 tight junction protein 2	PREDICTED: tight junction protein ZO-2 isoform X1	tight junction protein ZO-1 isoform X1	NA
ENSMUSG00000024817	OMA03071	Yes	No	No	No	No	NA	NA	NA	NA	NA	Uhrf2 ubiquitin-like, containing PHD and RING finger domains 2	E3 ubiquitin-protein ligase UHRF2	NA	NA
ENSMUSG00000024818	OMA17992	No	No	No	No	NA	NA	NA	NA	NA	Yes	Slc25a45 solute carrier family 25, member 45	solute carrier family 25 member 45 precursor	NA	NA
ENSMUSG00000024827	OMA00887	No	No	No	No	No	No	Rep:1.68	No	No	No	Gldc glycine decarboxylase	PREDICTED: glycine dehydrogenase (decarboxylating), mitochondrial isoform X1	glycine dehydrogenase (decarboxylating), mitochondrial isoform X1	glycine dehydrogenase (decarboxylating), mitochondrial precursor [Homo sapiens]
ENSMUSG00000024831	OMA02783	No	No	No	No	No	No	Rep:0.82	NA	NA	No	Ighmbp2 immunoglobulin mu binding protein 2	PREDICTED: DNA-binding protein SMUBP-2	DNA-binding protein SMUBP-2	NA
ENSMUSG00000024833	OMA05978	No	No	Yes	No	NA	No	No	No	No	No	Pola2 polymerase (DNA directed), alpha 2	DNA polymerase alpha subunit B	DNA polymerase alpha subunit B	DNA polymerase subunit alpha B [Salmo salar]
ENSMUSG00000024837	OMA11036	No	No	Yes	No	NA	NA	NA	NA	NA	NA	Dmrt1 doublesex and mab-3 related transcription factor 1	PREDICTED: doublesex- and mab-3-related transcription factor 1	NA	NA
ENSMUSG00000024841	OMA18175	No	No	No	No	No	No	No	No	No	Yes	Eif1ad eukaryotic translation initiation factor 1A domain containing	probable RNA-binding protein EIF1AD	probable RNA-binding protein EIF1AD	PREDICTED: probable RNA-binding protein EIF1AD [Chelonia mydas]
ENSMUSG00000024857	OMA16396	No	No	Yes	No	NA	NA	NA	NA	NA	NA	Cabp2 calcium binding protein 2	PREDICTED: calcium-binding protein 2	NA	NA
ENSMUSG00000024868++	OMA16527	Yes	Act:-3.25	Yes	No	NA	No	No	NA	NA	NA	Dkk1 dickkopf WNT signaling pathway inhibitor 1	dickkopf-related protein 1 precursor	dickkopf-1 precursor	NA
ENSMUSG00000024878	OMA08393	Yes	No	Yes	No	NA	No	Act:-2.52	Yes	No	No	Cbwd1 COBW domain containing 1	COBW domain containing 1, gene 2	COBW domain-containing protein 1-like	COBW domain-containing protein 1 [Rana catesbeiana]
ENSMUSG00000024883	OMA13052	Yes	No	No	Rep:1.18	No	NA	NA	NA	NA	NA	Rin1 Ras and Rab interactor 1	PREDICTED: ras and Rab interactor 1	NA	NA
ENSMUSG00000024887	OMA05250	No	No	No	Rep:1.27	No	No	No	NA	NA	No	Asah2 N-acylsphingosine amidohydrolase 2	N-acylsphingosine amidohydrolase (non-lysosomal ceramidase) 2	neutral ceramidase	NA
ENSMUSG00000024891	OMA09418	No	No	Yes	No	NA	No	No	NA	NA	NA	Slc29a2 solute carrier family 29 (nucleoside transporters), member 2	equilibrative nucleoside transporter 2	equilibrative nucleoside transporter 1 isoform X2	NA
ENSMUSG00000024892	OMA00590	Yes	No	No	No	No	No	Act:-1.22	No	No	No	Pcx pyruvate carboxylase	PREDICTED: pyruvate carboxylase, mitochondrial	pyruvate carboxylase, mitochondrial isoform X6	Pyruvate carboxylase, mitochondrial;
ENSMUSG00000024899	OMA02714	No	No	No	No	Yes	No	Act:-0.99	NA	NA	NA	Papss2 3'-phosphoadenosine 5'-phosphosulfate synthase 2	PREDICTED: bifunctional 3'-phosphoadenosine 5'-phosphosulfate synthase 2	bifunctional 3'-phosphoadenosine 5'-phosphosulfate synthase isoform X2	NA
ENSMUSG00000024900	OMA01784	No	No	No	No	No	No	Act:-0.50	No	No	Yes	Cpt1a carnitine palmitoyltransferase 1a, liver	PREDICTED: carnitine O-palmitoyltransferase 1, liver isoform isoform X1	carnitine O-palmitoyltransferase 1, liver isoform isoform X1	carnitine palmitoyltransferase I-like [Oncorhynchus mykiss]
ENSMUSG00000024902	OMA15983	No	No	No	No	No	No	Rep:0.73	No	No	No	Mrpl11 mitochondrial ribosomal protein L11	39S ribosomal protein L11, mitochondrial	39S ribosomal protein L11, mitochondrial	Mitochondrial ribosomal protein L11 [Bos taurus]
ENSMUSG00000024905	OMA12547	No	No	No	Rep:2.00	NA	No	Rep:0.92	NA	NA	NA	Tesmin testis expressed metallothionein like	protein lin-54 homolog	protein lin-54 homolog	NA
ENSMUSG00000024908	OMA01474	No	No	Yes	No	No	No	Rep:0.86	No	No	NA	Ppp6r3 protein phosphatase 6, regulatory subunit 3	serine/threonine-protein phosphatase 6 regulatory subunit 3	serine/threonine-protein phosphatase 6 regulatory subunit 3 isoform X3	Serine/threonine-protein phosphatase 6 regulatory subunit 3 [Crassostrea gigas]
ENSMUSG00000024909	OMA05971	No	No	Yes	Act:-1.06	NA	No	Act:-1.13	No	No	NA	Efemp2 epidermal growth factor-containing fibulin-like extracellular matrix protein 2	PREDICTED: EGF-containing fibulin-like extracellular matrix protein 2	latent-transforming growth factor beta-binding protein 2-like isoform X5	Ci-META1 precursor [Ciona intestinalis]
ENSMUSG00000024912	OMA17099	No	No	No	Rep:2.27	NA	NA	NA	No	No	NA	Fosl1 fos-like antigen 1	PREDICTED: fos-related antigen 1	NA	NA
ENSMUSG00000024921	OMA00245	Yes	No	No	No	NA	No	Rep:0.41	NA	NA	NA	Smarca2 SWI/SNF related, matrix associated, actin dependent regulator of chromatin, subfamily a, member 2	PREDICTED: probable global transcription activator SNF2L2 isoform X1	transcription activator BRG1 isoform X1	NA
ENSMUSG00000024924	OMA01783	No	No	No	No	Yes	No	No	No	No	NA	Vldlr very low density lipoprotein receptor	PREDICTED: very low-density lipoprotein receptor isoform X1	low-density lipoprotein receptor-related protein 8 isoform X1	vitellogenin receptor, putative [Ixodes scapularis]
ENSMUSG00000024926	OMA03625	No	No	No	No	Yes	No	No	No	No	NA	Kat5 K(lysine) acetyltransferase 5	histone acetyltransferase KAT5	histone acetyltransferase KAT5 isoform X2	histone acetyltransferase KAT5 isoform beta [Mus musculus]
ENSMUSG00000024942	OMA02716	No	No	No	No	NA	No	Act:-1.13	No	Act:-1.35	NA	Capn1 calpain 1	calpain-1 catalytic subunit	calpain-9-like isoform X1	SJCHGC01809 protein [Schistosoma japonicum]
ENSMUSG00000024943	OMA01764	No	No	No	No	Yes	No	No	No	No	Yes	Smc5 structural maintenance of chromosomes 5	PREDICTED: structural maintenance of chromosomes protein 5 isoform X1	structural maintenance of chromosomes protein 5 isoform X2	Structural maintenance of chromosomes protein 5 [Heterocephalus glaber]
ENSMUSG00000024944	OMA12225	No	No	No	No	NA	No	Act:-1.09	No	No	No	Arl2 ADP-ribosylation factor-like 2	ADP-ribosylation factor-like protein 2	ADP-ribosylation factor-like protein 2	ADP-ribosylation factor-like protein 2 [Crassostrea gigas]
ENSMUSG00000024957	OMA13064	No	No	No	No	NA	No	Rep:1.21	No	No	NA	Kcnk4 potassium channel, subfamily K, member 4	PREDICTED: potassium channel subfamily K member 4	potassium channel subfamily K member 16	Two pore potassium channel protein sup-9 [Trichinella spiralis]
ENSMUSG00000024960	OMA01313	No	No	Yes	No	No	No	No	No	No	NA	Plcb3 phospholipase C, beta 3	PREDICTED: 1-phosphatidylinositol 4,5-bisphosphate phosphodiesterase beta-3 isoform X1	1-phosphatidylinositol 4,5-bisphosphate phosphodiesterase beta-1 isoform X6	phospholipase C beta [Chaetopterus variopedatus]
ENSMUSG00000024963	OMA21357	No	No	Yes	No	No	NA	NA	NA	NA	NA	Dnajc4 DnaJ heat shock protein family (Hsp40) member C4	dnaJ homolog subfamily C member 4	NA	NA
ENSMUSG00000024966	OMA02884	No	No	No	No	No	No	Act:-0.87	No	No	No	Stip1 stress-induced phosphoprotein 1	stress-induced-phosphoprotein 1	stress-induced-phosphoprotein 1	stress-induced phosphoprotein 1 [Xenopus (Silurana) tropicalis]
ENSMUSG00000024969	OMA01792	No	No	No	No	NA	No	Rep:0.58	NA	NA	Yes	Mark2 MAP/microtubule affinity regulating kinase 2	serine/threonine-protein kinase MARK2	MAP/microtubule affinity-regulating kinase 3 isoform X5	NA
ENSMUSG00000024974	OMA00344	No	No	No	No	NA	No	Rep:0.37	No	No	No	Smc3 structural maintenance of chromosomes 3	PREDICTED: structural maintenance of chromosomes protein 3	structural maintenance of chromosomes protein 3	Structural maintenance of chromosomes protein 3 [Crassostrea gigas]
ENSMUSG00000024976	OMA02555	No	No	No	No	No	No	Rep:0.75	No	No	No	Shoc2 soc-2 (suppressor of clear) homolog (C. elegans)	PREDICTED: leucine-rich repeat protein SHOC-2	leucine-rich repeat protein SHOC-2	leucine-rich repeat protein SHOC-2 [Xenopus laevis]
ENSMUSG00000024978	OMA02828	Yes	No	No	No	No	No	Rep:0.64	No	No	NA	Gpam glycerol-3-phosphate acyltransferase, mitochondrial	glycerol-3-phosphate acyltransferase 1, mitochondrial	glycerol-3-phosphate acyltransferase 1, mitochondrial isoform X3	PREDICTED: glycerol-3-phosphate acyltransferase 1, mitochondrial isoform X1 [Microplitis demolitor]
ENSMUSG00000024979	OMA12431	No	No	No	Act:-1.36	NA	NA	NA	NA	NA	NA	Tectb tectorin beta	PREDICTED: beta-tectorin	NA	NA
ENSMUSG00000024981	OMA03996	No	No	No	No	No	No	No	No	No	NA	Acsl5 acyl-CoA synthetase long-chain family member 5	long-chain-fatty-acid--CoA ligase 5	long-chain-fatty-acid--CoA ligase 1	Long-chain-fatty-acid--CoA ligase 1;
ENSMUSG00000024982	OMA06070	Yes	No	No	No	NA	No	No	Yes	No	No	Zdhhc6 zinc finger, DHHC domain containing 6	palmitoyltransferase ZDHHC6	palmitoyltransferase ZDHHC6	zinc finger protein, putative [Ixodes scapularis]
ENSMUSG00000024983	OMA12258	Yes	No	No	No	No	No	No	No	No	Yes	Vti1a vesicle transport through interaction with t-SNAREs 1A	vesicle transport through interaction with t-SNAREs homolog 1A	vesicle transport through interaction with t-SNAREs homolog 1A isoform X2	vesicle transport through interaction with t-SNAREs homolog 1A isoform 2 [Gallus gallus]
ENSMUSG00000024985	OMA03457	Yes	No	Yes	No	NA	No	No	NA	NA	NA	Tcf7l2 transcription factor 7 like 2, T cell specific, HMG box	transcription factor 7-like 2	HMG protein Tcf/Lef	NA
ENSMUSG00000024986	OMA11425	No	No	No	No	NA	No	No	Yes	No	NA	Hhex hematopoietically expressed homeobox	hematopoietically-expressed homeobox protein hhex	hematopoietically-expressed homeobox protein HHEX homolog	Hex homeobox transcription factor
ENSMUSG00000024987	OMA06132	No	Act:-2.74	Yes	No	NA	NA	NA	No	No	NA	Cyp26a1 cytochrome P450, family 26, subfamily a, polypeptide 1	cytochrome P450 family 26 subfamily A member 1	NA	cytochrome P450, family 46, subfamily A, polypeptide 1 [Xenopus (Silurana) tropicalis]
ENSMUSG00000024993	OMA13299	No	No	NA	NA	Yes	No	No	No	No	No	Fam45a family with sequence similarity 45, member A	NA	LOW QUALITY PROTEIN: protein FAM45A	PREDICTED: protein FAM45A [Danio rerio]
ENSMUSG00000024998	OMA00365	No	Rep:1.10	No	No	Yes	NA	NA	NA	NA	NA	Plce1 phospholipase C, epsilon 1	PREDICTED: 1-phosphatidylinositol 4,5-bisphosphate phosphodiesterase epsilon-1	NA	NA
ENSMUSG00000024999	OMA03230	No	No	No	No	Yes	No	No	No	No	No	Noc3l NOC3 like DNA replication regulator	PREDICTED: LOW QUALITY PROTEIN: nucleolar complex protein 3 homolog	nucleolar complex protein 3 homolog	nucleolar complex protein 3 homolog [Xenopus laevis]
ENSMUSG00000025001	OMA02333	No	No	No	No	NA	No	Act:-0.57	No	No	No	Hells helicase, lymphoid specific	lymphoid-specific helicase	lymphocyte-specific helicase	helicase, lymphoid-specific [Xenopus (Silurana) tropicalis]
ENSMUSG00000025010	OMA07361	No	No	Yes	No	No	No	No	No	No	NA	Ccnj cyclin J	cyclin-J	cyclin-J	Cyclin-J [Columba livia]
ENSMUSG00000025013	OMA01467	No	Act:-3.87	No	No	NA	NA	NA	NA	NA	NA	Tll2 tolloid-like 2	PREDICTED: tolloid-like protein 2	NA	NA
ENSMUSG00000025017	OMA06567	Yes	No	No	No	NA	No	No	No	No	NA	Pik3ap1 phosphoinositide-3-kinase adaptor protein 1	PREDICTED: phosphoinositide 3-kinase adapter protein 1 isoform X1	phosphoinositide 3-kinase adapter protein 1 isoform X17	stump [Drosophila virilis]
ENSMUSG00000025019	NA	No	No	NA	NA	NA	NA	NA	NA	NA	NA	Lcor ligand dependent nuclear receptor corepressor	NA	NA	NA
ENSMUSG00000025020	OMA00404	No	No	No	No	NA	No	Act:-0.71	NA	NA	No	Slit1 slit homolog 1 (Drosophila)	slit homolog 1 protein precursor	slit homolog 1 protein isoform X2	NA
ENSMUSG00000025024	OMA09554	No	No	Yes	No	No	No	No	No	No	No	Smndc1 survival motor neuron domain containing 1	survival of motor neuron-related-splicing factor 30	survival of motor neuron-related-splicing factor 30-like	Survival of motor neuron-related-splicing factor 30 [Osmerus mordax]
ENSMUSG00000025025	OMA15113	No	No	Yes	No	NA	NA	NA	NA	NA	NA	Mxi1 MAX interactor 1, dimerization protein	max-interacting protein 1	NA	NA
ENSMUSG00000025026	OMA03992	No	No	No	No	NA	No	Rep:0.65	NA	NA	NA	Add3 adducin 3 (gamma)	gamma-adducin	gamma-adducin isoform X2	NA
ENSMUSG00000025035	OMA10564	No	No	No	No	No	No	Rep:0.72	No	No	NA	Arl3 ADP-ribosylation factor-like 3	PREDICTED: ADP-ribosylation factor-like protein 3	ADP-ribosylation factor-like protein 3	RecName: Full=ADP-ribosylation factor-like protein 3 [Taeniopygia guttata]
ENSMUSG00000025038	OMA04803	Yes	No	No	No	No	No	No	No	No	NA	Efhc2 EF-hand domain (C-terminal) containing 2	EF-hand domain-containing family member C2	EF-hand domain-containing family member C2	EFHC2 protein [Ciona intestinalis]
ENSMUSG00000025040	OMA14776	Yes	No	No	No	No	NA	NA	Yes	No	Yes	Fundc1 FUN14 domain containing 1	FUN14 domain-containing protein 1	NA	FUN14 domain-containing protein 1 [Salmo salar]
ENSMUSG00000025041	OMA02201	No	No	No	No	Yes	No	Rep:0.73	Yes	No	NA	Nt5c2 5'-nucleotidase, cytosolic II	cytosolic purine 5'-nucleotidase	cytosolic purine 5'-nucleotidase isoform X2	cytosolic purine 5'-nucleotidase [Xenopus (Silurana) tropicalis]
ENSMUSG00000025051	NA	Yes	No	NA	NA	NA	NA	NA	NA	NA	NA	Samt4 spermatogenesis associated multipass transmembrane protein 4	NA	NA	NA
ENSMUSG00000025058	OMA19169	No	No	No	Rep:1.99	NA	NA	NA	NA	NA	NA	5430427O19Rik RIKEN cDNA 5430427O19 gene	PREDICTED: uncharacterized protein CXorf21 homolog	NA	NA
ENSMUSG00000025068	OMA17852	No	No	No	No	Yes	No	No	NA	NA	NA	Gsto1 glutathione S-transferase omega 1	glutathione S-transferase omega 2	glutathione S-transferase omega-1 isoform X2	NA
ENSMUSG00000025085	OMA02949	Yes	Rep:1.13	No	No	NA	NA	NA	Yes	No	NA	Ablim1 actin-binding LIM protein 1	PREDICTED: actin-binding LIM protein 1 isoform X10	NA	actin-binding LIM protein 1 [Cricetulus griseus]
ENSMUSG00000025086	OMA16418	No	No	No	No	NA	No	No	NA	NA	Yes	Trub1 TruB pseudouridine (psi) synthase family member 1	PREDICTED: probable tRNA pseudouridine synthase 1	probable tRNA pseudouridine synthase 1	NA
ENSMUSG00000025091	OMA08091	No	No	No	No	Yes	No	No	No	No	NA	Pnliprp2 pancreatic lipase-related protein 2	inactive pancreatic lipase-related protein 1	pancreatic triacylglycerol lipase	Inactive pancreatic lipase-related protein 1;
ENSMUSG00000025104	OMA11898	Yes	No	No	No	NA	NA	NA	NA	NA	NA	Hdgfl3 HDGF like 3	hepatoma-derived growth factor-related protein 3	NA	NA
ENSMUSG00000025128	OMA22539	No	No	Yes	No	NA	NA	NA	NA	NA	NA	Bhlhe22 basic helix-loop-helix family, member e22	PREDICTED: oligodendrocyte transcription factor 2	NA	NA
ENSMUSG00000025129	OMA17679	No	No	No	Act:-1.08	NA	NA	NA	No	No	NA	Ppp1r27 protein phosphatase 1, regulatory subunit 27	PREDICTED: protein phosphatase 1 regulatory subunit 27	NA	protein phosphatase 1, regulatory (inhibitor) subunit 12B, isoform CRA_g [Homo sapiens]
ENSMUSG00000025130	OMA05040	No	No	No	No	Yes	No	Act:-1.19	No	No	No	P4hb prolyl 4-hydroxylase, beta polypeptide	protein disulfide-isomerase precursor	ER calcistorin precursor	protein disulfide isomerase [Haliotis discus discus]
ENSMUSG00000025132	OMA12952	No	No	No	No	No	No	Act:-1.87	No	No	No	Arhgdia Rho GDP dissociation inhibitor (GDI) alpha	rho GDP-dissociation inhibitor 1	Rho GDP dissociation inhibitor (GDI)	Rho GDP dissociation inhibitor (GDI) [Strongylocentrotus purpuratus]
ENSMUSG00000025133	OMA01061	No	No	No	No	NA	No	Act:-1.00	No	No	No	Ints4 integrator complex subunit 4	PREDICTED: integrator complex subunit 4 isoform X1	integrator complex subunit 4-like	integrator complex subunit 4 [Homo sapiens]
ENSMUSG00000025134	OMA10954	No	No	No	No	No	No	Rep:0.71	No	No	NA	Alyref Aly/REF export factor	THO complex subunit 4	THO complex subunit 4-A-like	THO complex subunit 4-B [Zootermopsis nevadensis]
ENSMUSG00000025140	OMA18313	No	No	NA	NA	Yes	No	No	NA	NA	NA	Pycr1 pyrroline-5-carboxylate reductase 1	NA	LOW QUALITY PROTEIN: pyrroline-5-carboxylate reductase 1, mitochondrial-like	NA
ENSMUSG00000025142	OMA11866	No	No	Yes	No	No	NA	NA	No	No	Yes	Aspscr1 alveolar soft part sarcoma chromosome region, candidate 1 (human)	tether containing UBX domain for GLUT4	NA	SJCHGC09548 protein [Schistosoma japonicum]
ENSMUSG00000025145	OMA06893	No	No	No	No	No	No	No	Yes	No	NA	Lrrc45 leucine rich repeat containing 45	leucine-rich repeat-containing protein 45 isoform 1	leucine-rich repeat-containing protein 45	leucine-rich repeat-containing protein 45 [Homo sapiens]
ENSMUSG00000025147	OMA15982	No	No	Yes	No	Yes	No	No	Yes	No	NA	Mob2 MOB kinase activator 2	MOB kinase activator 2	MOB kinase activator 2 isoform X2	Mps one binder kinase activator-like protein [Cerapachys biroi]
ENSMUSG00000025156	OMA02929	No	No	No	No	No	No	No	No	No	No	Gps1 G protein pathway suppressor 1	COP9 signalosome complex subunit 1	COP9 signalosome complex subunit 1-like isoform X1	COP9 signalosome complex subunit 1 [Crassostrea gigas]
ENSMUSG00000025159	OMA02467	No	No	Yes	No	No	No	No	No	No	Yes	Mms19 MMS19 (MET18 S. cerevisiae)	MMS19 nucleotide excision repair protein homolog	MMS19 nucleotide excision repair protein homolog	MMS19 nucleotide excision repair protein homolog;
ENSMUSG00000025162	OMA03450	Yes	No	No	No	No	No	No	NA	NA	NA	Csnk1d casein kinase 1, delta	casein kinase I isoform delta	LOW QUALITY PROTEIN: casein kinase I	NA
ENSMUSG00000025170	OMA08076	Yes	No	No	No	NA	NA	NA	NA	NA	NA	Rab40b Rab40B, member RAS oncogene family	ras-related protein Rab-40B	NA	NA
ENSMUSG00000025171	OMA11928	No	No	Yes	No	Yes	NA	NA	NA	NA	NA	Ubtd1 ubiquitin domain containing 1	ubiquitin domain-containing protein 1	NA	NA
ENSMUSG00000025172	OMA12134	No	No	No	Act:-1.40	No	NA	NA	No	No	NA	Ankrd2 ankyrin repeat domain 2 (stretch responsive muscle)	ankyrin repeat domain-containing protein 2	NA	ankyrin repeat domain-containing protein [Salpingoeca rosetta]
ENSMUSG00000025173	OMA04706	No	No	No	No	NA	No	No	No	No	Yes	Wdr45b WD repeat domain 45B	WD repeat domain phosphoinositide-interacting protein 3	WD repeat domain phosphoinositide-interacting protein 3	WD repeat domain phosphoinositide-interacting protein 3 [Crassostrea gigas]
ENSMUSG00000025185	OMA03598	Yes	No	No	No	NA	No	No	NA	NA	NA	Loxl4 lysyl oxidase-like 4	PREDICTED: lysyl oxidase homolog 4	deleted in malignant brain tumors 1 protein-like isoform X1	NA
ENSMUSG00000025190	OMA05524	No	No	No	Act:-1.20	No	No	No	No	No	No	Got1 glutamic-oxaloacetic transaminase 1, soluble	aspartate aminotransferase, cytoplasmic	aspartate aminotransferase, cytoplasmic	aspartate aminotransferase, cytoplasmic [Gallus gallus]
ENSMUSG00000025193	OMA11332	Yes	No	No	No	NA	No	No	Yes	No	No	Cutc cutC copper transporter	copper homeostasis protein cutC homolog	copper homeostasis protein cutC homolog isoform X1	copper homeostasis protein cutC homolog [Danio rerio]
ENSMUSG00000025194	OMA01090	Yes	No	No	No	NA	NA	NA	Yes	No	NA	Abcc2 ATP-binding cassette, sub-family C (CFTR/MRP), member 2	PREDICTED: canalicular multispecific organic anion transporter 1	NA	multidrug resistance-associated protein 3 [Squalus acanthias]
ENSMUSG00000025199	OMA02762	No	No	Yes	No	No	NA	NA	No	Act:-1.55	NA	Chuk conserved helix-loop-helix ubiquitous kinase	inhibitor of nuclear factor kappa-B kinase subunit alpha	NA	inhibitor of nuclear factor kappa-B kinase subunit alpha-like [Exaiptasia pallida]
ENSMUSG00000025200	OMA05518	Yes	No	No	No	No	No	No	NA	NA	No	Cwf19l1 CWF19-like 1, cell cycle control (S. pombe)	PREDICTED: CWF19-like protein 1	CWF19-like protein 1	NA
ENSMUSG00000025208	OMA17987	No	No	No	No	No	No	No	Yes	No	No	Mrpl43 mitochondrial ribosomal protein L43	39S ribosomal protein L43, mitochondrial	39S ribosomal protein L43, mitochondrial	39S ribosomal protein L43, mitochondrial precursor [Rana catesbeiana]
ENSMUSG00000025212	OMA08168	No	No	Yes	No	Yes	NA	NA	NA	NA	No	Sfxn3 sideroflexin 3	sideroflexin-3	NA	NA
ENSMUSG00000025213	OMA12152	No	No	No	Act:-1.90	No	No	No	NA	NA	NA	Kazald1 Kazal-type serine peptidase inhibitor domain 1	kazal-type serine protease inhibitor domain-containing protein 1 precursor	insulin-like growth factor-binding protein 7	NA
ENSMUSG00000025217	OMA01968	Yes	No	No	No	No	No	No	No	No	NA	Btrc beta-transducin repeat containing protein	F-box/WD repeat-containing protein 1A	F-box/WD repeat-containing protein 11	F-box/WD repeat-containing protein 11 [Salmo salar]
ENSMUSG00000025218	OMA07189	No	No	Yes	No	NA	NA	NA	No	No	No	Poll polymerase (DNA directed), lambda	DNA polymerase lambda	NA	DNA polymerase lambda [Corvus brachyrhynchos]
ENSMUSG00000025219	OMA13055	Yes	Act:-1.24	Yes	No	Yes	No	No	Yes	No	NA	Fgf8 fibroblast growth factor 8	fibroblast growth factor 8 precursor	fibroblast growth factor 18 isoform X2	FGF8A
ENSMUSG00000025220	OMA01260	No	No	No	No	No	No	Rep:0.56	No	No	NA	Mgea5 meningioma expressed antigen 5 (hyaluronidase)	protein O-GlcNAcase	protein O-GlcNAcase isoform X3	hyaluronoglucosaminidase, putative [Ixodes scapularis]
ENSMUSG00000025221	OMA10154	No	No	No	No	Yes	No	No	NA	NA	NA	Kcnip2 Kv channel-interacting protein 2	PREDICTED: Kv channel-interacting protein 2	Kv channel-interacting protein 4	NA
ENSMUSG00000025223	OMA03756	No	No	Yes	No	NA	NA	NA	No	No	No	Ldb1 LIM domain binding 1	LIM domain-binding protein 1	NA	LIM domain binding protein isoform 2 [Nematostella vectensis]
ENSMUSG00000025231	OMA03533	No	No	No	No	Yes	No	No	No	No	NA	Sufu suppressor of fused homolog (Drosophila)	suppressor of fused homolog	suppressor of fused homolog	suppressor of fused-like protein [Saccoglossus kowalevskii]
ENSMUSG00000025235	OMA06222	No	No	No	No	No	No	No	No	Act:-1.13	NA	Bbs4 Bardet-Biedl syndrome 4 (human)	Bardet-Biedl syndrome 4 protein homolog	Bardet-Biedl syndrome 4 protein isoform X2	Bardet-Biedl syndrome 4 protein-like [Stylophora pistillata]
ENSMUSG00000025236	OMA07553	Yes	No	No	No	Yes	No	No	NA	NA	NA	Adpgk ADP-dependent glucokinase	PREDICTED: ADP-dependent glucokinase-like isoform X1	ADP-dependent glucokinase	NA
ENSMUSG00000025240	OMA02880	Yes	No	No	No	NA	No	No	No	No	No	Sacm1l SAC1 suppressor of actin mutations 1-like (yeast)	PREDICTED: phosphatidylinositide phosphatase SAC1	phosphatidylinositide phosphatase SAC1-B	phosphatidylinositide phosphatase SAC1 [Xenopus laevis]
ENSMUSG00000025255	OMA00055	Yes	No	Yes	No	NA	No	Act:-0.80	NA	NA	NA	Zfhx4 zinc finger homeodomain 4	PREDICTED: zinc finger homeobox protein 4 isoform X1	zinc finger homeobox protein 4-like isoform X2	NA
ENSMUSG00000025261	OMA00028	No	No	No	No	No	No	No	Yes	No	NA	Huwe1 HECT, UBA and WWE domain containing 1	PREDICTED: E3 ubiquitin-protein ligase HUWE1	E3 ubiquitin-protein ligase HUWE1	E3 ubiquitin-protein ligase HUWE1 [Macaca mulatta]
ENSMUSG00000025265	OMA02965	No	No	Yes	No	NA	No	No	Yes	No	NA	Fgd1 FYVE, RhoGEF and PH domain containing 1	PREDICTED: FYVE, RhoGEF and PH domain-containing protein 1 isoform X1	FYVE, RhoGEF and PH domain-containing protein 4 isoform X5	FYVE, RhoGEF and PH domain-containing protein 4;
ENSMUSG00000025268	OMA18040	No	No	No	No	NA	No	No	NA	NA	NA	Maged2 melanoma antigen, family D, 2	NSE3 homolog, SMC5-SMC6 complex component	non-structural maintenance of chromosomes element 3 homolog	NA
ENSMUSG00000025269	OMA09925	No	No	No	No	NA	No	No	No	No	Yes	Apex2 apurinic/apyrimidinic endonuclease 2	DNA-(apurinic or apyrimidinic site) lyase 2	DNA-(apurinic or apyrimidinic site) lyase 2 isoform X2	DNA-(apurinic or apyrimidinic site) lyase 2 [Xenopus (Silurana) tropicalis]
ENSMUSG00000025271	OMA04252	No	No	Yes	No	No	No	No	NA	NA	NA	Pfkfb1 6-phosphofructo-2-kinase/fructose-2,6-biphosphatase 1	PREDICTED: 6-phosphofructo-2-kinase/fructose-2,6-bisphosphatase 1 isoform X1	6-phosphofructo-2-kinase/fructose-2,6-bisphosphatase 1 isoform X3	NA
ENSMUSG00000025278	OMA00095	Yes	No	Yes	No	NA	No	No	NA	NA	NA	Flnb filamin, beta	PREDICTED: filamin-B isoform X1	filamin-A isoform X3	NA
ENSMUSG00000025290	OMA13238	No	No	No	No	No	No	Act:-0.98	No	No	No	Rps24 ribosomal protein S24	40S ribosomal protein S24	40S ribosomal protein S24	40S ribosomal protein S24;
ENSMUSG00000025314	NA	Yes	No	NA	NA	NA	NA	NA	NA	NA	NA	Ptprj protein tyrosine phosphatase, receptor type, J	NA	NA	NA
ENSMUSG00000025318	OMA02284	No	No	No	No	Yes	NA	NA	Yes	No	NA	Jph3 junctophilin 3	PREDICTED: junctophilin-3	NA	Junctophilin-2;
ENSMUSG00000025321	OMA05009	Yes	Act:-1.84	No	No	NA	NA	NA	NA	NA	NA	Itgb8 integrin beta 8	PREDICTED: integrin beta-8	NA	NA
ENSMUSG00000025323	OMA01901	Yes	No	No	No	NA	NA	NA	NA	NA	NA	Sp4 trans-acting transcription factor 4	PREDICTED: transcription factor Sp4	NA	NA
ENSMUSG00000025324	OMA00889	Yes	Rep:1.91	No	No	Yes	NA	NA	Yes	No	No	Atp10a ATPase, class V, type 10A	PREDICTED: probable phospholipid-transporting ATPase VA isoform X1	NA	putative phospholipid-transporting ATPase VD [Tupaia chinensis]
ENSMUSG00000025337	OMA09338	No	No	No	No	No	No	Rep:2.18	No	No	No	Sbds SBDS ribosome assembly guanine nucleotide exchange factor	ribosome maturation protein SBDS	LOW QUALITY PROTEIN: ribosome maturation protein SBDS	PREDICTED: ribosome maturation protein SBDS [Pteropus alecto]
ENSMUSG00000025348	OMA02603	No	No	No	No	No	No	Rep:0.81	NA	NA	NA	Itga7 integrin alpha 7	PREDICTED: integrin alpha-7 isoform X1	integrin alpha-6 isoform X2	NA
ENSMUSG00000025351	OMA17651	No	No	No	No	Yes	No	Rep:3.37	NA	NA	NA	Cd63 CD63 antigen	CD63 antigen	CD63 antigen isoform X2	NA
ENSMUSG00000025355	OMA08753	No	No	No	No	NA	NA	NA	No	No	NA	Mmp19 matrix metallopeptidase 19	PREDICTED: matrix metalloproteinase-19	NA	matrix metalloproteinase 14 precursor [Strongylocentrotus purpuratus]
ENSMUSG00000025358	OMA07483	No	No	No	No	NA	No	Act:-1.06	No	No	No	Cdk2 cyclin-dependent kinase 2	cyclin-dependent kinase 2	cyclin-dependent kinase 2	Cell division protein kinase 2 [Crassostrea gigas]
ENSMUSG00000025362	OMA15427	No	No	No	No	No	No	Act:-1.09	No	No	Yes	Rps26 ribosomal protein S26	40S ribosomal protein S26	40S ribosomal protein S26 isoform X2	ribosomal protein S26 [Acyrthosiphon pisum]
ENSMUSG00000025364	OMA04779	No	No	No	No	No	No	Act:-0.90	No	No	No	Pa2g4 proliferation-associated 2G4	proliferation-associated protein 2G4	proliferation-associated protein 2G4	proliferation-associated 2G4 [Xenopus (Silurana) tropicalis]
ENSMUSG00000025371	OMA14052	No	No	No	Act:-1.11	NA	No	No	Yes	No	No	Chmp6 charged multivesicular body protein 6	charged multivesicular body protein 6	charged multivesicular body protein 6	Charged multivesicular body protein 6 [Osmerus mordax]
ENSMUSG00000025372	OMA04402	No	No	No	No	NA	No	Act:-0.79	Yes	No	NA	Baiap2 brain-specific angiogenesis inhibitor 1-associated protein 2	brain-specific angiogenesis inhibitor 1-associated protein 2	brain-specific angiogenesis inhibitor 1-associated protein 2	brain-specific angiogenesis inhibitor 1-associated protein 2 [Danio rerio]
ENSMUSG00000025381	OMA15748	No	No	No	No	NA	No	Act:-1.10	No	No	NA	Cnpy2 canopy FGF signaling regulator 2	protein canopy homolog 2 precursor	protein canopy homolog 2	protein canopy homolog 2 precursor [Danio rerio]
ENSMUSG00000025384	OMA14488	No	No	Yes	No	NA	No	No	No	No	NA	Faap100 Fanconi anemia core complex associated protein 100	PREDICTED: Fanconi anemia core complex-associated protein 100 isoform X1	Fanconi anemia core complex-associated protein 100 isoform X2	Fanconi anemia-associated protein of 100 kDa [Macaca mulatta]
ENSMUSG00000025389	OMA10192	No	No	No	No	NA	No	Rep:0.61	Yes	No	No	Mip major intrinsic protein of lens fiber	lens fiber major intrinsic protein	lens fiber major intrinsic protein	aquaporin 1 [Penaeus monodon]
ENSMUSG00000025393	OMA02966	No	No	No	No	No	No	Act:-0.78	No	No	No	Atp5b ATP synthase, H+ transporting mitochondrial F1 complex, beta subunit	ATP synthase subunit beta, mitochondrial	ATP synthase subunit beta, mitochondrial	ATP synthase, H+ transporting, mitochondrial F1 complex, beta polypeptide [Saccoglossus kowalevskii]
ENSMUSG00000025396	OMA13125	No	Act:-7.54	No	No	NA	Yes	No	No	No	NA	Hsd17b6 hydroxysteroid (17-beta) dehydrogenase 6	retinol dehydrogenase 7, gene 2 precursor	retinol dehydrogenase 16-like	retinol dehydrogenase 2 [Danio rerio]
ENSMUSG00000025401	OMA02558	No	No	Yes	No	NA	NA	NA	NA	NA	NA	Myo1a myosin IA	unconventional myosin-Ia	NA	NA
ENSMUSG00000025403	OMA04322	No	No	Yes	Act:-1.14	No	No	No	No	No	No	Shmt2 serine hydroxymethyltransferase 2 (mitochondrial)	serine hydroxymethyltransferase, mitochondrial	serine hydroxymethyltransferase, mitochondrial	Serine hydroxymethyltransferase, mitochondrial;
ENSMUSG00000025404	OMA01379	Yes	No	Yes	No	NA	NA	NA	NA	NA	NA	R3hdm2 R3H domain containing 2	R3H domain-containing protein 2	NA	NA
ENSMUSG00000025405	OMA28842	No	No	NA	NA	NA	No	Rep:2.05	NA	NA	NA	Inhbc inhibin beta-C	NA	growth/differentiation factor 8-like	NA
ENSMUSG00000025407	OMA06596	No	No	Yes	No	NA	NA	NA	NA	NA	NA	Gli1 GLI-Kruppel family member GLI1	PREDICTED: zinc finger protein GLI1 isoform X1	NA	NA
ENSMUSG00000025420	OMA05204	No	No	No	No	No	No	Rep:0.70	No	No	NA	Katnal2 katanin p60 subunit A-like 2	katanin p60 ATPase-containing subunit A-like 2	katanin p60 ATPase-containing subunit A-like 2 isoform X5	katanin p60 ATPase-containing subunit A-like 2 [Xenopus (Silurana) tropicalis]
ENSMUSG00000025421	OMA10921	No	No	No	No	No	No	No	Yes	No	NA	Hdhd2 haloacid dehalogenase-like hydrolase domain containing 2	haloacid dehalogenase-like hydrolase domain-containing protein 2	haloacid dehalogenase-like hydrolase domain-containing protein 2	haloacid dehalogenase-like hydrolase domain-containing protein 2 [Ictalurus punctatus]
ENSMUSG00000025427	OMA17728	Yes	No	Yes	No	NA	NA	NA	NA	NA	NA	Rnf165 ring finger protein 165	PREDICTED: RING finger protein 165	NA	NA
ENSMUSG00000025432	OMA02542	No	No	No	No	Yes	No	No	No	No	Yes	Avil advillin	PREDICTED: advillin	advillin isoform X4	villin [Capsaspora owczarzaki ATCC 30864]
ENSMUSG00000025437	OMA01734	No	No	No	No	NA	NA	NA	NA	NA	Yes	Usp33 ubiquitin specific peptidase 33	ubiquitin carboxyl-terminal hydrolase 33	NA	NA
ENSMUSG00000025468	NA	Yes	No	NA	NA	NA	NA	NA	NA	NA	NA	Caly calcyon neuron-specific vesicular protein	NA	NA	NA
ENSMUSG00000025473	OMA12203	No	No	No	Rep:1.74	NA	NA	NA	NA	NA	NA	Adam8 a disintegrin and metallopeptidase domain 8	ADAM metallopeptidase domain 28 precursor	NA	NA
ENSMUSG00000025477	OMA05124	No	No	Yes	No	No	No	No	No	No	No	Inpp5a inositol polyphosphate-5-phosphatase A	type I inositol 1,4,5-trisphosphate 5-phosphatase	inositol polyphosphate-5-phosphatase A isoform X1	type I inositol 1,4,5-trisphosphate 5-phosphatase [Apis mellifera]
ENSMUSG00000025479	OMA13655	No	No	No	No	NA	No	No	No	Act:-1.05	NA	Cyp2e1 cytochrome P450, family 2, subfamily e, polypeptide 1	uncharacterized protein LOC100036663	cytochrome P450 2J2-like	Putative cytochrome P450 CYP44 [Crassostrea gigas]
ENSMUSG00000025482	OMA15864	No	No	No	No	NA	No	No	Yes	No	NA	Odf3 outer dense fiber of sperm tails 3	outer dense fiber protein 3	outer dense fiber protein 3	outer dense fiber protein 3 [Saccoglossus kowalevskii]
ENSMUSG00000025486	OMA14758	No	No	No	No	NA	NA	NA	Yes	No	NA	Sirt3 sirtuin 3	PREDICTED: NAD-dependent protein deacetylase sirtuin-3, mitochondrial	NA	NAD-dependent protein deacetylase sirtuin-3, mitochondrial;
ENSMUSG00000025487	OMA05758	No	No	No	Act:-1.44	No	No	No	No	No	No	Psmd13 proteasome (prosome, macropain) 26S subunit, non-ATPase, 13	26S proteasome non-ATPase regulatory subunit 13	26S proteasome non-ATPase regulatory subunit 13 isoform X3	26S proteasome non-ATPase regulatory subunit 13 [Fukomys damarensis]
ENSMUSG00000025492	OMA23832	No	No	No	Rep:1.72	NA	NA	NA	NA	NA	NA	Ifitm3 interferon induced transmembrane protein 3	PREDICTED: dispanin subfamily A member 2b-like	NA	NA
ENSMUSG00000025494	OMA14273	No	No	No	No	Yes	NA	NA	NA	NA	NA	Sigirr single immunoglobulin and toll-interleukin 1 receptor (TIR) domain	PREDICTED: single Ig IL-1-related receptor	NA	NA
ENSMUSG00000025503	OMA07507	No	No	No	No	No	No	Act:-0.71	No	Act:-1.07	Yes	Taldo1 transaldolase 1	transaldolase	transaldolase	transaldolase 1 [Salpingoeca rosetta]
ENSMUSG00000025519	OMA03473	Yes	No	No	No	NA	No	No	No	No	NA	Tktl2 transketolase-like 2	transketolase-like protein 1	transketolase isoform X1	Transketolase [Zootermopsis nevadensis]
ENSMUSG00000025521	OMA19102	No	No	Yes	No	NA	No	No	No	Act:-1.03	NA	Tmem192 transmembrane protein 192	transmembrane protein 192	transmembrane protein 192	transmembrane protein 192 [Rattus norvegicus]
ENSMUSG00000025527	OMA19432	No	No	No	Rep:1.10	NA	No	No	NA	NA	NA	Satl1 spermidine/spermine N1-acetyl transferase-like 1	PREDICTED: spermidine/spermine N(1)-acetyltransferase-like protein 1	diamine acetyltransferase 2-like	NA
ENSMUSG00000025528	OMA23562	No	No	No	Rep:1.13	NA	NA	NA	NA	NA	NA	2010106E10Rik RIKEN cDNA 2010106E10 gene	PREDICTED: uncharacterized protein LOC496784	NA	NA
ENSMUSG00000025533	OMA05906	No	No	No	No	No	No	Rep:0.70	No	No	No	Asl argininosuccinate lyase	argininosuccinate lyase	argininosuccinate lyase isoform X2	RecName: Full=Argininosuccinate lyase; Short=ASAL; AltName: Full=Arginosuccinase [Rana catesbeiana]
ENSMUSG00000025544	OMA02012	No	No	No	No	NA	No	Act:-0.50	No	Rep:1.05	No	Tm9sf2 transmembrane 9 superfamily member 2	PREDICTED: transmembrane 9 superfamily member 2	transmembrane 9 superfamily member 2	PREDICTED: transmembrane 9 superfamily member 2-like [Columba livia]
ENSMUSG00000025545	OMA09963	Yes	No	Yes	No	NA	No	No	No	Act:-1.42	No	Clybl citrate lyase beta like	PREDICTED: citrate lyase subunit beta-like protein, mitochondrial isoform X1	citramalyl-CoA lyase, mitochondrial	citrate lyase beta-like [Danio rerio]
[truncated: 6,001 more rows]

## Sheet: XTR
GENE	OMA	MMU_CHIP	MMU_DE	XTR_CHIP	XTR_DE	CIONA	SPU_CHIP	SPU_DE	NVE_CHIP	NVE_DE	COW	MMU	XTR	SPU	NVE
[truncated: 7,187 more rows]

## Sheet: CIN
GENE	OMA	MMU_CHIP	MMU_DE	XTR_CHIP	XTR_DE	CIONA	SPU_CHIP	SPU_DE	NVE_CHIP	NVE_DE	COW	MMU	XTR	SPU	NVE
[truncated: 3,260 more rows]

## Sheet: SPU
GENE	OMA	MMU_CHIP	MMU_DE	XTR_CHIP	XTR_DE	CIONA	SPU_CHIP	SPU_DE	NVE_CHIP	NVE_DE	COW	MMU	XTR	SPU	NVE
[truncated: 7,054 more rows]

[truncated: 3 more sheets: NVE, COW, ++Marked]
