# Supplementary material for: An ancestral Wnt-Brachyury feedback loop and recruitment of mesoderm-determining target genes revealed by comparative Brachyury target screens
Source: Research Square preprint supplement (doi:10.21203/rs.3.rs-753399/v1), 2021-08-10
Supplement: Supplementary file 2 [file 72e8a87d6a782249c9cb10cd.xlsx]

## Sheet: Sheet1
Quantitative data of Nematostella Bra knockdown experiments (Fig. 4)					Quantitative data of Strongylocentrotus Bra knockdown experiments (Fig. 5)
Up regulated genes upon Nvbrachyury knockdown	STDMO	ATGMO	SpliceMO
Nvbrachyury	45/52	77/86	36/38
NvWnt2	93/97	116/122	96/106
NvAshA	15/16	11/19	17/23
Nvrfx4-like	21/23	15/19	21/23
Nvlhx1	20/20	15/20	18/22
Nvngn-1	15/19	21/28	17/22
Nvtbx2/3	17/21	14/18	19/24
Nvmbnl1	25/28	14/33	9/16
NvIsl-1	19/21	31/41	27/32
Nvnoc	12/23	21/27	18/18
Down regulated genes upon Nvbrachyury knockdown	STDMO	ATGMO	SpliceMO
NvfoxA	75/84	96/107	33/39
NvfoxB	52/63	51/57	28/37
Nvfgf8a	114/124	83/90	40/48
NvWnt1	47/67	56/58	49/50
NvWnt3	62/88	84/84	46/48
NvsoxB1	20/27	44/53	12/25
Nvgpc5	13/22	32/38	46/56
Nvmyc2	30/38	17/21	13/21
Nvefnb2	25/33	27/39	24/27
Nvnotum	15/19	13/26	19/20
Nvrab18	18/23	9/14	31/38
No change in regulation upon Nvbrachyury knockdown	STDMO	ATGMO	SpliceMO
NvRgmb	23/27	19/20	33/33
Nvplp2	43/46	16/22	21/28
NvSema3a	31/35	42/44	18/20
NvCAM2	28/28	25/29	32/35
NvNkx2.2D	17/21	22/23	14/14
NvZicA	27/29	25/32	37/39
Nvgrin3a	12/28	17/30	10/22
No change in regulation upon NvsoxB1knockdown	Control sh	NvsoxB1 sh1	NvsoxB1 sh2
NvAshA	95/115	42/61	38/61
Nvlhx1	43/58	45/70	54/61
Nvrfx4-like	63/80	82/106	53/63
NvsoxB2	104/119	31/52	45/63
NvIsl-1	65/77	71/97	43/95
Nvtbx2/3	56/59	93/103	56/97
Nvngn-1	52/70	43/62	82/123
NvsoxB1	56/76	34/42	52/66
