# Supplementary material for: An ancestral Wnt-Brachyury feedback loop and recruitment of mesoderm-determining target genes revealed by comparative Brachyury target screens
Source: Research Square preprint supplement (doi:10.21203/rs.3.rs-753399/v1), 2021-08-10
Supplement: Supplementary file 3 [file e541d4a2d031769405b2d268.xlsx]

## Sheet: ancestral target table
ancestral homolog	mouse ortholog	Biological function in Mus musculus or Xenopus according to https://www.uniprot.org
Node I		Caspaspora + (Metazoa)
bra	bra	mesoderm, pioneering chromatin modifying factor
Rnf	Rnf113a1	tumor suppressors, DNA repair genes and cytokine receptor-associated molecules, and is probably involved in mediating protein-protein interactions.
zic	zic1	Acts as a transcriptional activator. Involved in neurogenesis. Plays important roles in the early stage of organogenesis of the CNS, as well as during dorsal spinal cord development and maturation of the cerebellum.
Rfx1/2/3	Rfx3	ciliogenesis
Node II		Nematostella + (Deuterostomes)
Atonal	ATOH7	Transcription factor that positively regulates the determination of retinal ganglion cell fate and formation of the optic nerve and retino-hypothalamic tract
Arid2	Arid2	embryonic patterning, cell lineage gene regulation, cell cycle control, transcriptional regulation and chromatin structure modification, hepatocellular carcinomas
Dach	Dach2	eye and limb development, carcinogenesis
Depdc1a	Depdc1a	transcriptional corepressor.
Dmbx	Dmbx1	transcriptional repressor. May repress OTX2-mediated transactivation by forming a heterodimer with OTX2 on the P3C (5'-TAATCCGATTA-3') sequence. Required for brain development
Ebf3	Ebf3	transcriptional activator
Elmsan1	Elmsan1	transcriptional regulation
Emx2	Emx2	Transcription factor, which in cooperation with EMX2, acts to generate the boundary between the roof and archipallium in the developing brain. May function in combinations with OTX1/2 to specify cell fates in the developing central nervous system
fezf2	fezf2	zinc finger, Transcription repressor. Required for the specification of corticospinal motor neurons and other subcerebral projection neurons. May play a role in layer and neuronal subtype-specific patterning of subcortical projections and axonal fasciculation. Controls the development of dendritic arborization and spines of large layer V pyramidal neurons.
FoxA	FoxA1	In embryonic development is required for notochord formation. Involved in the development of multiple endoderm-derived organ systems such as the liver, pancreas and lungs
FoxB	FoxB1	brain development, cell migration
FoxN	FoxN2	skeletal muscle differentiation
FoxP	FoxP2	transcriptional repressor. Plays a role in synapse formation by regulating SRPX2 levels. Involved in neural mechanisms mediating the development of speech and languageelopment
Gm29106	Gm29106	DNA binding
Hes	Hes1	May act as a negative regulator of myogenesis by inhibiting the functions of MYOD1 and ASH1.
Hhex	Hhex	Transcriptional repressor (By similarity). Activator of WNT-mediated transcription in conjunction with CTNNB1 (PubMed:20028982). Establishes anterior identity at two levels; acts early to enhance canonical WNT-signaling by repressing expression of TLE4, and acts later to inhibit NODAL-signaling by directly targeting NODAL (By similarity). May play a role in hematopoietic differentiation
Hmg20a	Hmg20a	Plays a role in neuronal differentiation as chromatin-associated protein. Acts as inhibitor of HMG20B. Overcomes the repressive effects of the neuronal silencer REST and induces the activation of neuronal-specific genes.
Islet	Isl1	Plays a fundamental role in the gene regulatory network essential for retinal ganglion cell (RGC) differentiation. Involved in the specification of motor neurons in cooperation with LHX3 and LDB1. Binds to insulin gene enhancer sequences. Essential for heart development.
Lhx	Lhx1	early mesoderm formation and later in lateral mesoderm differentiation and neurogenesis
Mbnl	Mbnl1	in cooperation with a PBX protein (such as PBX2) is proposed to be involved in the transcriptional activation of EPHA8 in the developing midbrain.
Meis	Meis1	Acts as a transcriptional regulator of PAX6. Required for hematopoiesis, megakaryocyte lineage development and vascular patterning.
Msx	Msx2	Acts as a transcriptional regulator in bone development.
mycN	mycN	Positively regulates the transcription of MYCNOS in neuroblastoma cells
Nr2f1	Nr2f1	binds to the ovalbumin promoter
Otp	Otp	Probably involved in the differentiation of hypothalamic neuroendocrine cells
Pax	Pax3	Transcription factor that may regulate cell proliferation, migration and apoptosis. Involved in neural development and myogenesis. Transcriptional activator of MITF, acting synergistically with SOX10
Pbx	Pbx3	dorsal spinal cord development, neuron development
Rere	Rere	Plays a role as a transcriptional repressor during development. May play a role in the control of cell survival. Overexpression of RERE recruits BAX to the nucleus particularly to POD and triggers caspase-3 activation, leading to cell death.
Rfx4-like	Rfx4	Transcription factor that plays a role in early brain development.
Rfx6	Rfx6	Transcription factor required to direct islet cell differentiation during endocrine pancreas development. Specifically required for the differentiation of 4 of the 5 islet cell types and for the production of insulin.
Six3	Six3	During forebrain development represses WNT1 expression allowing zona limitans intrathalamica formation and thereby ensuring proper anterio-posterior patterning of the diencephalon and formation of the rostral diencephalon, Six3 activity is required for the formation of the telencephalon
SoxB1	Sox1	Transcriptional activator. May function as a switch in neuronal development. Keeps neural cells undifferentiated by counteracting the activity of proneural proteins and suppresses neuronal differentiation
Sox11	Sox11	Plays a redundant role with SOX4 and SOX12 in cell survival of developing tissues such as the neural tube, branchial arches and somites
Tbx2/3	Tbx3	Probably plays a role in limb pattern formation
Tfap2	Tfap2b	involved in a large spectrum of important biological functions including proper eye, face, body wall, limb and neural tube development.
Tfap4	Tfap4	unreviewed
Tgif	Tgif1	Binds to a retinoid X receptor (RXR) responsive element from the cellular retinol-binding protein II promoter
Zc3h12	Zc3h12a	Endoribonuclease involved in various biological functions such as cellular inflammatory response and immune homeostasis, glial differentiation of neuroprogenitor cells, cell death of cardiomyocytes, adipogenesis and angiogenesis.
Zfp503	Zfp503	May function as a transcriptional repressor.
Node III		Sea urchin + (Chordates)
Achaete-scute	Ascl1	Transcription factor that plays a key role in neuronal differentiation
E2F	E2F7	Atypical E2F transcription factor that participates in various processes such as angiogenesis, polyploidization of specialized cells and DNA damage response.
Ets	Ets1	May also regulate angiogenesis through regulation of expression of genes controlling endothelial cell migration and invasion
Evx	Evx1	May play a role in the specification of neuronal cell types.
FoxC	Foxc1	Stimulates Indian hedgehog (Ihh)-induced target gene expression mediated by the transcription factor GLI2, and hence regulates endochondral ossification
FoxD	Foxd2	Promotes development of neural crest cells from neural tube progenitors.
Gata4/5/6	Gata4	In cooperation with TBX5, it binds to cardiac super-enhancers and promotes cardiomyocyte gene expression, while it downregulates endocardial and endothelial gene expression
Hox11/13	Hox11/13	Sequence-specific transcription factor which is part of a developmental regulatory system that provides cells with specific positional identities on the anterior-posterior axis.
Hox6	Hox6	Sequence-specific transcription factor which is part of a developmental regulatory system that provides cells with specific positional identities on the anterior-posterior axis.
Hox8	Hox8	Sequence-specific transcription factor which is part of a developmental regulatory system that provides cells with specific positional identities on the anterior-posterior axis.
Irf6	Irf6	Key determinant of the keratinocyte proliferation-differentiation switch involved in appropriate epidermal development. Plays a role in regulating mammary epithelial cell proliferation.
Irx	Irx	Transcription factor involved in SHH-dependent neural patterning
Mnx	Mnx1	Putative transcription factor involved in pancreas development and function.
Msx	Msx	Acts as a transcriptional regulator in bone development.
Nhlh	Nhlh2	May serve as DNA-binding protein and may be involved in the control of cell-type determination, possibly within the developing nervous system.
Otx	Otx2	Transcription factor probably involved in the development of the brain and the sense organs.
Pou3F	Pou3F1	Acts as a transcriptional repressor of myelin-specific genes
Sox17	Sox17A-A	All of the sox17 proteins are required for embryonic endoderm development and gastrulation movements, and show some redundancy in function. In addition, the sox17 proteins have distinct but overlapping roles in later gut development. Acts downstream of vegt-signaling in endoderm differentiation to induce a range of endodermal genes both directly (including endodermin and dhh/chh) and indirectly. …
Sox-10	Sox-10	Transcription factor that plays a central role in developing and mature glia
Tlx3	Tlx3	central nervous system development, neuron differentiation
Node IV		Chordates (Ciona + Vertebrates)
Cdx	Cdx-1	Could play a role in the terminal differentiation of the intestine
FoxI	Foxi2	Transcription factor in cell differentiation
Hif1	Hif1A	Functions as a master transcriptional regulator of the adaptive response to hypoxia.
Hmbox1	Hmbox1	Important for TERT binding to chromatin, indicating a role in recruitment of the telomerase complex to telomeres
Hox13	Hoxb13	part of a developmental regulatory system that provides cells with specific positional identities on the anterior-posterior axis
Lmx1	Lmx1A	Required for development of the roof plate and, in turn, for specification of dorsal cell fates in the CNS and developing vertebrae.
Nfia	Nfia	These proteins are individually capable of activating transcription and replication.
Nkx6-1	Nkx6-1	Together with NKX2-2 and IRX3, restricts the generation of motor neurons to the appropriate region of the neural tube.
Npas3	Npas3	May play a broad role in neurogenesis.
Npas4	Npas4	Transcription factor expressed in neurons of the brain that regulates the excitatory-inhibitory balance within neural circuits and is required for contextual memory in the hyppocampus
Nr1H4	Nr1H4	Ligand-activated transcription factor. Receptor for bile acids (BAs)
Pax3	Pax3	Involved in neural development and myogenesis.
Pax9	Pax9	Transcription factor required for normal development of thymus, parathyroid glands, ultimobranchial bodies, teeth, skeletal elements of skull and larynx as well as distal limbs.
Pbx	Pbx1	Probably in complex with MEIS2, is involved in transcriptional regulation by KLF4.
Six1/2	Six1	Plays an important role in the development of several organs, including kidney, muscle and inner ear
Skil	Skil	May have regulatory role in cell division or differentiation in response to extracellular signals
Smad2/3	Smad2	Binds the TRE element in the promoter region of many genes that are regulated by TGF-beta and, on formation of the SMAD2/SMAD4 complex, activates transcription.
Tbx18	Tbx18	involved in developmental processes of a variety of tissues and organs, including the heart, the coronary vessels, the ureter, and the vertebral column.
Tbx6	Tbx6	T-box transcription factor that plays an essential role in the determination of the fate of axial stem cells: neural vs mesodermal. Acts in part by down-regulating, a specific enhancer (N1) of SOX2, to inhibit neural development.
Trp63	Trp63	Involved in Notch signaling by probably inducing JAG1 and JAG2
Node V		Vertebrates (Mouse + Xenopus)
Ahr		Ligand-activated transcriptional activator. Mediates biochemical and toxic effects of halogenated aromatic hydrocarbons. Involved in cell-cycle regulation.
Antxr2		Necessary for cellular interactions with laminin and the extracellular matrix.
Ar		Receptor for the chemotactic and inflammatory peptide anaphylatoxin C5a.
Atf1		Binds the cAMP response element (CRE) (consensus: 5'-GTGACGT[AC][AG]-3'), a sequence present in many viral and cellular promoters. Binds to the Tax-responsive element (TRE) of HTLV-I. Mediates PKA-induced stimulation of CRE-reporter genes. Represses the expression of FTH1 and other antioxidant detoxification genes.
Atf5		Important regulator of the cerebral cortex formation, functions in cerebral cortical neuroprogenitor cells to maintain proliferation and to block differentiation into neurons.
Bach1		Plays important roles in coordinating transcription activation and repression by MAFK
Barx1		Plays a role in suppressing endodermal Wnt activity.
Batf3		AP-1 family transcription factor that controls the differentiation of CD8+ thymic conventional dendritic cells in the immune system.
Baz2B		Chromatin remodeling
Bhlhe22		Forms with PRDM8 a transcriptional repressor complex controlling genes involved in neural development and neuronal differentiation
Bola1		Acts as a mitochondrial iron-sulfur (Fe-S) cluster assembly factor
Camta1		Transcriptional activator
Cers4		Ceramide synthase that catalyzes formation of ceramide from sphinganine and acyl-CoA substrates
Cic		Transcriptional repressor which plays a role in development of the central nervous system
Creb3L2		Plays a critical role in chondrogenesis by activating the transcription of SEC23A, which promotes the transport and secretion of cartilage matrix proteins, and possibly that of ER biogenesis-related genes
Ctbp1		orepressor targeting diverse transcription regulators such as GLIS2 or BCL6. Functions in brown adipose tissue (BAT) differentiation.
Cux1		Transcription factor involved in the control of neuronal differentiation in the brain.
Dbx1		Could have a role in patterning the central nervous system during embryogenesis.
Deaf1		Regulates epithelial cell proliferation and side-branching in the mammary gland. Required for neural tube closure and skeletal patterning.
Dmap1		Involved in transcription repression and activation. Its interaction with HDAC2 may provide a mechanism for histone deacetylation in heterochromatin following replication of DNA at late firing origins
Dmrt1		Transcription factor that plays a key role in male sex determination and differentiation by controlling testis development and male germ cell proliferation.
Dmrt2		Transcriptional activator that directly regulates early activation of the myogenic determination gene MYF5. Involved in somitogenesis during embryogenesis and somite development and differentiation into sclerotome and dermomyotome.
Dnajc1		Chaperone function
E2f7		Directly represses transcription of classical E2F transcription factors such as E2F1
Ebf1		Transcriptional activator which recognizes variations of the palindromic sequenc. Multicellular organism development
etx1		May control the differentiation, survival and proliferation of lymphoid cells. May also regulate angiogenesis through regulation of expression of genes controlling endothelial cell migration and invasion
Etx2		Protein-lysine methyltransferase that selectively trimethylates the flavoprotein ETFB in mitochondria.
Fos		Has a critical function in regulating the development of cells destined to form and maintain the skeleton. It is thought to have an important role in signal transduction, cell proliferation and differentiation.
Foxe3		Transcription factor that controls lens epithelial cell growth through regulation of proliferation, apoptosis and cell cycle
Foxh1		Transcriptional activator. Recognizes and binds to the DNA sequence 5'-TGT[GT][GT]ATT-3'. Required for induction of the goosecoid (GSC) promoter by TGF-beta or activin signaling. Forms a transcriptionally active complex containing FOXH1/SMAD2/SMAD4 on a site on the GSC promoter called TARE (TGF-beta/activin response element)
Foxl1		Transcription factor required for proper proliferation and differentiation in the gastrointestinal epithelium. Target gene of the hedgehog (Hh) signaling pathway via GLI2 AND GLI3 transcription factors.
Foxo6		Transcriptional activator
Gata2		Transcriptional activator which regulates endothelin-1 gene expression in endothelial cells.
Gm4881		unreviewed
Hoxa1		Regulates multiple developmental processes including brainstem, inner and outer ear, abducens nerve and cardiovascular development and morphogenesis as well as cognition and behavior
Hoxb1		provides cells with specific positional identities on the anterior-posterior axis. Acts on the anterior body structures.
Hoxa11		Sequence-specific transcription factor which is part of a developmental regulatory system that provides cells with specific positional identities on the anterior-posterior axis.
Hoxa5		Sequence-specific transcription factor which is part of a developmental regulatory system that provides cells with specific positional identities on the anterior-posterior axis.
Hoxa6		Sequence-specific transcription factor which is part of a developmental regulatory system that provides cells with specific positional identities on the anterior-posterior axis.
Hoxb1		Sequence-specific transcription factor which is part of a developmental regulatory system that provides cells with specific positional identities on the anterior-posterior axis.
Hoxb8		Sequence-specific transcription factor which is part of a developmental regulatory system that provides cells with specific positional identities on the anterior-posterior axis.
Hoxc10		Sequence-specific transcription factor which is part of a developmental regulatory system that provides cells with specific positional identities on the anterior-posterior axis.
Hoxc12		Sequence-specific transcription factor which is part of a developmental regulatory system that provides cells with specific positional identities on the anterior-posterior axis.
Hoxc5		Sequence-specific transcription factor which is part of a developmental regulatory system that provides cells with specific positional identities on the anterior-posterior axis.
Hoxc8		Sequence-specific transcription factor which is part of a developmental regulatory system that provides cells with specific positional identities on the anterior-posterior axis.
Hoxd10		Sequence-specific transcription factor which is part of a developmental regulatory system that provides cells with specific positional identities on the anterior-posterior axis.
Hoxd8		Sequence-specific transcription factor which is part of a developmental regulatory system that provides cells with specific positional identities on the anterior-posterior axis.
Id2		Inhibits skeletal muscle and cardiac myocyte differentiation. Transcriptional regulator (lacking a basic DNA binding domain) which negatively regulates the basic helix-loop-helix (bHLH) transcription factors by forming heterodimers and inhibiting their DNA binding and transcriptional activity.
Id3		Involved in myogenesis by inhibiting skeletal muscle and cardiac myocyte differentiation and promoting muscle precursor cells proliferation.
Lef1		Participates in the Wnt signaling pathway, in various differentiation and patterning processes
Lin28A		Essential for skeletal muscle differentiation program through the translational up-regulation of IGF2 expression (PubMed:17473174).
Max		Forms a sequence-specific DNA-binding protein complex with MYC or MAD which recognizes the core sequence 5'-CAC[GA]TG-3'. The MYC:MAX complex is a transcriptional activator, whereas the MAD:MAX complex is a repressor.
Mbd2		Binds CpG islands in promoters where the DNA is methylated at position 5 of cytosine within CpG dinucleotides.
Mbd5		Binds to heterochromatin. Does not interact with either methylated or unmethylated DNA
Mef2C		Controls cardiac morphogenesis and myogenesis, and is also involved in vascular development.
Mesp1		epithelialization of somitic mesoderm and in the development of cardiac mesoderm. Defines the rostrocaudal patterning of the somites by participating in distinct Notch pathways.
Mesp2		important role in somitogenesis. Specifies the rostral half of the somites. Together with MESP1 is involved in the epithelialization of somitic mesoderm and in the development of cardiac mesoderm. May play a role with Tcf15 in the differentiation of myotomal and sclerotomal cells by regulating Pax family genes.
Met		During embryonic development, MET signaling plays a role in gastrulation, development and migration of muscles and neuronal precursors, angiogenesis and kidney formation.
Mga		Functions as a dual-specificity transcription factor, regulating the expression of both MAX-network and T-box family target genes. Functions as a repressor or an activator.
Mitf		Transcription factor that regulates the expression of genes with essential roles in cell differentiation, proliferation and survival. Plays a critical role in the differentiation of various cell types, such as neural crest-derived melanocytes, mast cells, osteoclasts and optic cup-derived retinal pigment epithelium.
Mkx		May act as a morphogenetic regulator of cell adhesion. Participates in the early events that lead to differentiation.
Msgn1		Involved in specifying the paraxial, but not dorsal, mesoderm. May regulate the expression of T-box transcription factors required for mesoderm formation and differentiation.
Mxi1		Transcriptional repressor. MXI1 binds with MAX to form a sequence-specific DNA-binding protein complex which recognizes the core sequence 5'-CAC[GA]TG-3'. MXI1 thus antagonizes MYC transcriptional activity by competing for MAX.
Myf5		Induces fibroblasts to differentiate into myoblasts.
Myf6		Involved in muscle differentiation (myogenic factor). Induces fibroblasts to differentiate into myoblasts.
Myod1		Acts as a transcriptional activator that promotes transcription of muscle-specific target genes and plays a role in muscle differentiation
Mypop		Transcriptional repressor;
Myrfl		transcription regulator
Ncoa1		binds nuclear receptors and stimulates the transcriptional activities in a hormone-dependent fashion. Required with NCOA2 to control energy balance between white and brown adipose tissues.
Ncor2		Mediates the transcriptional repression activity of some nuclear receptors by promoting chromatin condensation, thus preventing access of the basal transcription.
Nedd4L		E3 ubiquitin-protein ligase which accepts ubiquitin from an E2 ubiquitin-conjugating enzyme in the form of a thioester and then directly transfers the ubiquitin to targeted substrates.
Neurod4		Mediates neuronal differentiation. Required for the regulation of amacrine cell fate specification in the retina.
Neurog3		Involved in neurogenesis. Also required for the specification of a common precursor of the 4 pancreatic endocrine cell types.
Nfatc4		involved in several processes, including the development and function of the immune, cardiovascular, musculoskeletal, and nervous systems. Along with NFATC3, involved in embryonic heart development
Nfe2		Endoplasmic reticulum membrane sensor that translocates into the nucleus in response to various stresses to act as a transcription factor
Nfic		These proteins are individually capable of activating transcription and replication.
Nkx2-1		Transcription factor that binds and activates the promoter of thyroid specific genes
Nkx3-1		Plays an important role in normal prostate development, regulating proliferation of glandular epithelium and in the formation of ducts in prostate.
Noto		Acts downstream of both FOXA2 and Brachyury (T) during notochord development
Nr1D1		Transcriptional repressor which coordinates circadian rhythm and metabolic pathways in a heme-dependent manner.
Nr2F6		Transcription factor predominantly involved in transcriptional repression.
Nr3C2		Receptor for both mineralocorticoids (MC) such as aldosterone and glucocorticoids (GC) such as corticosterone or cortisol.
Nr4A3		Plays a role in the regulation of proliferation, survival and differentiation of many different cell types and also in metabolism and inflammation. Mediates proliferation of vascular smooth muscle.During gastrulation plays a crucial role in the formation of anterior mesoderm by controlling cell migration
Nr6a1		Orphan nuclear receptor. Binds to a response element containing the sequence 5'-TCAAGGTCA-3'. May be involved in the regulation of gene expression in germ cell development during gametogenesis.
Olig3		May determine the distinct specification program of class A neurons in the dorsal part of the spinal cord and suppress specification of class B neurons.
Pan3		Regulatory subunit of the poly(A)-nuclease (PAN) deadenylation complex, one of two cytoplasmic mRNA deadenylases involved in general and miRNA-mediated mRNA turnover.
Pax2		Transcription factor that may have a role in kidney cell differentiation.
Pgr		activating or repressing steroid receptor
Phox2B		involved in neurogenesis and neuronal differentiation
Pitx2		Controls cell proliferation in a tissue-specific manner and is involved in morphogenesis. During embryonic development, exerts a role in the expansion of muscle progenitors.
Pknox2		regulation of transcription
Plxna2		Coreceptor for SEMA3A and SEMA6A. Necessary for signaling by SEMA6A and class 3 semaphorins and subsequent remodeling of the cytoskeleton. Plays a role in axon guidance, invasive growth and cell migration.
Plxnb1		Plays a role in GABAergic synapse development
Prdm5		Regulates hematopoiesis-associated protein-coding and microRNA
Rara		In concert with RARG, required for skeletal growth, matrix homeostasis and growth plate function
Rarg		In concert with RARA or RARB, required for skeletal growth, matrix homeostasis and growth plate function.
Rcor1		Essential component of the BHC complex, a corepressor complex that represses transcription of neuron-specific genes in non-neuronal cells.
Rfx2		Transcription factor that acts as a key regulator of spermatogenesis
Rora		Regulates genes involved in photoreceptor development including OPN1SW, OPN1SM and ARR3 and skeletal muscle development with MYOD1.
Runx1		Essential for the development of normal hematopoiesis.
Runx2		Transcription factor involved in osteoblastic differentiation and skeletal morphogenesis. Essential for the maturation of osteoblasts and both intramembranous and endochondral ossification.
Satb2		Required for the initiation of the upper-layer neurons (UL1) specific genetic program and for the inactivation of deep-layer neurons (DL) and UL2 specific genes. Acts as a molecular node in a transcriptional network regulating skeletal development and osteoblast differentiation.
Sebox		Probable transcription factor involved in the control of specification of mesoderm and endoderm.
Sim1		Transcriptional factor that may have pleiotropic effects during embryogenesis and in the adult.
Ski		May play a role in terminal differentiation of skeletal muscle cells but not in the determination of cells to the myogenic lineage. Functions as a repressor of TGF-beta signaling.
Skida1		not reviewed
Smad5		SMAD5 is a receptor-regulated SMAD (R-SMAD) (By similarity). Required for angiogenesis, bone, cartilage, cardiac development
Smad6		May block the BMP-SMAD1 signaling pathway by competing with SMAD4 for receptor-activated SMAD1-binding. Involved in aorta development, cardica valve smooth muscle development
Tcf21		Involved in epithelial-mesenchymal interactions in kidney and lung morphogenesis that include epithelial differentiation and branching morphogenesis. May be involved in the organogenesis of the spleen and heart and in cardiac and coronary artery development. May function in the development and sex differentiation of gonad via transcriptional regulation of AD4BP/SF-1.
Tcf7l1		Unreviewed
Tcfl2		unreviewed
Twist1		Inhibits myogenesis by sequestrating E proteins, inhibiting trans-activation by MEF2, and inhibiting DNA-binding by MYOD1 through physical interaction.
Uncx		Transcription factor involved in somitogenesis and neurogenesis. Required for the maintenance and differentiation of particular elements of the axial skeleton. May act upstream of PAX9. Plays a role in controlling the development of connections of hypothalamic neurons to pituitary elements, allowing central neurons to reach the peripheral blood circulation and to deliver hormones for control of p…
Vegt		Transcription factor required for both mesoderm and endoderm formation in the embryo; signaling determinants and concentration levels may determine which germ layer is formed. Acts together with beta-catenin to activate genes that are responsible for mesoderm induction including wnt-8, eomes t/bra, siamois, mix1 and sox17.
Xbp1		Required for cardiac myogenesis and hepatogenesis during embryonic development and the development of secretory tissues such as exocrine pancreas and salivary gland
Zbed4		Transcriptional regulator that binds to poly-guanine tracts in gene promoters and activates transcription
Zc2Hc1A		unreviewed
Zeb1		Positively regulates neuronal differentiation. Represses RCOR1 transcription activation during neurogenesis.
Zeb2		Represses transcription of E-cadherin. Central nervous system development
Zfhx3		Regulates the circadian locomotor rhythms via transcriptional activation of neuropeptidergic genes which are essential for intercellular synchrony and rhythm amplitude in the suprachiasmatic nucleus (SCN) of the brain. Involved in myogenesis. Regulator of myoblasts differentiation through the binding to the AT-rich sequence of MYF6 promoter and promoter repression.
Zfhx4		May play a role in neural and muscle differentiation.
Zhx2		May play a role in retinal development where it regulates the composition of bipolar cell populations, by promoting differentiation of bipolar OFF-type cells. In the brain, may promote maintenance and suppress differentiation of neural progenitor cells in the developing cortex

## Sheet: ancestral target graph
	total ancestral TFs	% neuronal	% mesodermal	% neuro/mesodermal
Node I	4	25	25	0
Node II	38	40	12.8	10
Node III	19	42	10.5	0
Node IV	19	26	15.7	0
Node V	121	12.4	24	2.5
